# Supplementary material
Source: HighWire-hosted journal article supplement (https://jitc.bmj.com/content/8/2/e001020)
Supplement: inline-supplementary-material-2 [file inline-supplementary-material-2.xlsx]

## Sheet: Index
Supplementary Tables
Supplementary Table 1. List of 34 tumor types used in this study (33 consist of primary tumors and one consisting of metastatic samples).
Supplementary Table 2. Sample metadata of 34 tumor types used in this study (33 consist of primary tumors and one consisting of metastatic samples).
Supplementary Table 3. List of data resouces, bioinformatics tools, and software.
Supplementary Table 4. Two-way ANOVA results of clinical factors comparing ACE2 and TMPRSS2 gene expression between groups. Tumor type and clinical group were included as variables.
Supplementary Table 5. Turkey's HSD results of clinical factors comparing ACE2 and TMPRSS2 gene expression between groups. Only used when more than two clinical groups exist.
Supplementary Table 6. Clinical correlates of ACE2 and TMPRSS2 gene expression in tumor or matched normal tissues within each type of cancer across 34 tumor types.
Supplementary Table 7. Welch Two Sample t-test or Tukey's HSD results of clinical correlates of ACE2 and TMPRSS2 gene expression in tumor or matched normal tissues within each type of cancer across 34 tumor types.
Supplementary Table 8. List of immune signatures and genes involved in each signature.
Supplementary Table 9. Correlation metrics between 5 immune signatures and ACE2 or TMPRSS2 gene expression in tumor or matched normal tissues per tumor type.
Supplementary Table 10. Correlation metrics between 64 immune and stroma cell subsets and ACE2 or TMPRSS2 gene expression per tumor type.
Supplementary Table 11. Correlation metrics between 75 commensal microbiota and ACE2 or TMPRSS2 gene expression per tumor type.
Supplementary Table 12. Variable importance of the clinical, immune, and microbiota features in contribution to ACE2 or TMPRSS2 expression in tumor or normal tissues across 34 tumor types.

## Sheet: TableS1
Index	Cancer	Disease Name	Tissue Type	Sample.total	Normal.sample.total	Tumor.sample.total	Normal.sample.paired.total	Tumor.sample.paired.total	Normal.ACE2.expr.is.NA	Tumor.ACE2.expr.is.NA.	Normal.ACE2.expr.is.NA.pct	Tumor.ACE2.expr.is.NA.pct	Normal.TMPRSS2.expr.is.NA	Tumor.TMPRSS2.expr.is.NA.	Normal.TMPRSS2.expr.is.NA.pct	Tumor.TMPRSS2.expr.is.NA.pct
1	ACC	Adrenocortical carcinoma	Endocrine tissues	79	0	79	0	0	0	0	NA	0	0	0	NA	0
2	BLCA	Bladder urothelial carcinoma	Kidney & urinary bladder	427	19	408	19	19	0	0	0	0	0	0	0	0
3	BRCA	Breast invasive carcinoma	Female	1197	113	1084	111	111	0	0	0	0	0	0	0	0
4	CESC	Cervical and endocervical cancers	Female	307	3	304	3	3	0	0	0	0	0	0	0	0
5	CHOL	Cholangiocarcinoma	Liver & gallbladder	45	9	36	9	9	0	0	0	0	0	0	0	0
6	COAD	Colon adenocarcinoma	Gastrointestinal tract	488	41	447	40	40	0	0	0	0	0	0	0	0
7	DLBC	Lymphoid Neoplasm Diffuse Large B-cell Lymphoma	Lymphoid tissues	48	0	48	0	0	0	0	NA	0	0	0	NA	0
8	ESCA	Esophageal carcinoma	Proximal digestive tract	170	9	161	6	6	0	0	0	0	0	0	0	0
9	GBM	Glioblastoma multiforme	Brain	152	0	152	0	0	0	0	NA	0	0	0	NA	0
10	HNSC	Head and Neck squamous cell carcinoma	Proximal digestive tract	544	44	500	43	43	0	0	0	0	0	0	0	0
11	KICH	Kidney Chromophobe	Kidney & urinary bladder	89	24	65	23	23	0	0	0	0	0	0	0	0
12	KIRC	Kidney renal clear cell carcinoma	Kidney & urinary bladder	602	72	530	72	72	0	0	0	0	0	0	0	0
13	KIRP	Kidney renal papillary cell carcinoma	Kidney & urinary bladder	320	32	288	31	31	0	0	0	0	0	0	0	0
14	LAML	Acute Myeloid Leukemia	Blood	145	0	145	0	0	0	0	NA	0	0	145	NA	1
15	LGG	Brain Lower Grade Glioma	Brain	510	0	510	0	0	0	0	NA	0	0	0	NA	0
16	LIHC	Liver hepatocellular carcinoma	Liver & gallbladder	421	50	371	50	50	0	0	0	0	0	0	0	0
17	LUAD	Lung adenocarcinoma	Lung	571	59	512	57	57	0	0	0	0	0	0	0	0
18	LUSC	Lung squamous cell carcinoma	Lung	550	49	501	49	49	0	0	0	0	0	0	0	0
19	MESO	Mesothelioma	Lung	86	0	86	0	0	0	0	NA	0	0	0	NA	0
20	OV	Ovarian serous cystadenocarcinoma	Female	264	0	264	0	0	0	0	NA	0	0	0	NA	0
21	PAAD	Pancreatic adenocarcinoma	Pancreas	181	4	177	4	4	0	0	0	0	0	0	0	0
22	PCPG	Pheochromocytoma and Paraganglioma	Endocrine tissues	181	3	178	3	3	0	0	0	0	0	0	0	0
23	PRAD	Prostate adenocarcinoma	Male	547	52	495	52	52	0	0	0	0	0	0	0	0
24	READ	Rectum adenocarcinoma	Gastrointestinal tract	169	10	159	9	9	0	0	0	0	0	0	0	0
25	SARC	Sarcoma	Soft & muscle tissues	261	2	259	2	2	0	0	0	0	0	0	0	0
26	SKCMmets	Skin Cutaneous Melanoma (Metastatic)	Skin	368	1	367	1	1	0	0	0	0	0	0	0	0
27	SKCMprimary	Skin Cutaneous Melanoma (Primary)	Skin	103	0	103	0	0	0	0	NA	0	0	0	NA	0
28	STAD	Stomach adenocarcinoma	Gastrointestinal tract	404	30	374	26	26	0	0	0	0	0	33	0	0.0882353
29	TGCT	Testicular Germ Cell Tumors	Male	134	0	134	0	0	0	0	NA	0	0	0	NA	0
30	THCA	Thyroid carcinoma	Endocrine tissues	560	58	502	58	58	0	0	0	0	0	0	0	0
31	THYM	Thymoma	Lymphoid tissues	121	2	119	2	2	0	0	0	0	0	0	0	0
32	UCEC	Uterine Corpus Endometrial Carcinoma	Female	552	22	530	22	22	0	0	0	0	0	0	0	0
33	UCS	Uterine Carcinosarcoma	Female	56	0	56	0	0	0	0	NA	0	0	0	NA	0
34	UVM	Uveal Melanoma	Eye	80	0	80	0	0	0	0	NA	0	0	0	NA	0
		TOTAL		10732	708	10024	692	692	0	0	-	-	0	178	-	-

## Sheet: TableS2
Index	Cancer	Tissue.Type	patient	Aliquot	Sample	shortLetterCode	definition	Plate	RNAseq.legacy.flag	Sampletype.flag	Aliquot.flag	Exclude.mets.flag	Clinical.flag	Include.in.final.cohort
1	ACC	Endocrine_tissues	TCGA-OR-A5LN	TCGA-OR-A5LN-01A-11R-A29S-07	TCGA-OR-A5LN-01A	TP	Primary solid Tumor	A29S	1	1	1	0	1	Yes
2	ACC	Endocrine_tissues	TCGA-OR-A5LO	TCGA-OR-A5LO-01A-11R-A29S-07	TCGA-OR-A5LO-01A	TP	Primary solid Tumor	A29S	1	1	1	0	1	Yes
3	ACC	Endocrine_tissues	TCGA-OR-A5JV	TCGA-OR-A5JV-01A-11R-A29S-07	TCGA-OR-A5JV-01A	TP	Primary solid Tumor	A29S	1	1	1	0	1	Yes
4	ACC	Endocrine_tissues	TCGA-OR-A5JW	TCGA-OR-A5JW-01A-11R-A29S-07	TCGA-OR-A5JW-01A	TP	Primary solid Tumor	A29S	1	1	1	0	1	Yes
5	ACC	Endocrine_tissues	TCGA-OR-A5LA	TCGA-OR-A5LA-01A-11R-A29S-07	TCGA-OR-A5LA-01A	TP	Primary solid Tumor	A29S	1	1	1	0	1	Yes
6	ACC	Endocrine_tissues	TCGA-OR-A5LP	TCGA-OR-A5LP-01A-11R-A29S-07	TCGA-OR-A5LP-01A	TP	Primary solid Tumor	A29S	1	1	1	0	1	Yes
7	ACC	Endocrine_tissues	TCGA-OR-A5JX	TCGA-OR-A5JX-01A-11R-A29S-07	TCGA-OR-A5JX-01A	TP	Primary solid Tumor	A29S	1	1	1	0	1	Yes
8	ACC	Endocrine_tissues	TCGA-OR-A5JS	TCGA-OR-A5JS-01A-11R-A29S-07	TCGA-OR-A5JS-01A	TP	Primary solid Tumor	A29S	1	1	1	0	1	Yes
9	ACC	Endocrine_tissues	TCGA-OR-A5LM	TCGA-OR-A5LM-01A-11R-A29S-07	TCGA-OR-A5LM-01A	TP	Primary solid Tumor	A29S	1	1	1	0	1	Yes
10	ACC	Endocrine_tissues	TCGA-OR-A5JT	TCGA-OR-A5JT-01A-11R-A29S-07	TCGA-OR-A5JT-01A	TP	Primary solid Tumor	A29S	1	1	1	0	1	Yes
11	ACC	Endocrine_tissues	TCGA-OR-A5LL	TCGA-OR-A5LL-01A-11R-A29S-07	TCGA-OR-A5LL-01A	TP	Primary solid Tumor	A29S	1	1	1	0	1	Yes
12	ACC	Endocrine_tissues	TCGA-OR-A5K8	TCGA-OR-A5K8-01A-11R-A29S-07	TCGA-OR-A5K8-01A	TP	Primary solid Tumor	A29S	1	1	1	0	1	Yes
13	ACC	Endocrine_tissues	TCGA-OR-A5JF	TCGA-OR-A5JF-01A-11R-A29S-07	TCGA-OR-A5JF-01A	TP	Primary solid Tumor	A29S	1	1	1	0	1	Yes
14	ACC	Endocrine_tissues	TCGA-OR-A5L6	TCGA-OR-A5L6-01A-11R-A29S-07	TCGA-OR-A5L6-01A	TP	Primary solid Tumor	A29S	1	1	1	0	1	Yes
15	ACC	Endocrine_tissues	TCGA-OR-A5L9	TCGA-OR-A5L9-01A-11R-A29S-07	TCGA-OR-A5L9-01A	TP	Primary solid Tumor	A29S	1	1	1	0	1	Yes
16	ACC	Endocrine_tissues	TCGA-OR-A5LT	TCGA-OR-A5LT-01A-11R-A29S-07	TCGA-OR-A5LT-01A	TP	Primary solid Tumor	A29S	1	1	1	0	1	Yes
17	ACC	Endocrine_tissues	TCGA-OR-A5LD	TCGA-OR-A5LD-01A-11R-A29S-07	TCGA-OR-A5LD-01A	TP	Primary solid Tumor	A29S	1	1	1	0	1	Yes
18	ACC	Endocrine_tissues	TCGA-OR-A5LS	TCGA-OR-A5LS-01A-11R-A29S-07	TCGA-OR-A5LS-01A	TP	Primary solid Tumor	A29S	1	1	1	0	1	Yes
19	ACC	Endocrine_tissues	TCGA-OR-A5L8	TCGA-OR-A5L8-01A-11R-A29S-07	TCGA-OR-A5L8-01A	TP	Primary solid Tumor	A29S	1	1	1	0	1	Yes
20	ACC	Endocrine_tissues	TCGA-OR-A5L4	TCGA-OR-A5L4-01A-11R-A29S-07	TCGA-OR-A5L4-01A	TP	Primary solid Tumor	A29S	1	1	1	0	1	Yes
21	ACC	Endocrine_tissues	TCGA-OR-A5JB	TCGA-OR-A5JB-01A-11R-A29S-07	TCGA-OR-A5JB-01A	TP	Primary solid Tumor	A29S	1	1	1	0	1	Yes
22	ACC	Endocrine_tissues	TCGA-OR-A5L5	TCGA-OR-A5L5-01A-11R-A29S-07	TCGA-OR-A5L5-01A	TP	Primary solid Tumor	A29S	1	1	1	0	1	Yes
23	ACC	Endocrine_tissues	TCGA-OR-A5K5	TCGA-OR-A5K5-01A-11R-A29S-07	TCGA-OR-A5K5-01A	TP	Primary solid Tumor	A29S	1	1	1	0	1	Yes
24	ACC	Endocrine_tissues	TCGA-OR-A5K6	TCGA-OR-A5K6-01A-11R-A29S-07	TCGA-OR-A5K6-01A	TP	Primary solid Tumor	A29S	1	1	1	0	1	Yes
25	ACC	Endocrine_tissues	TCGA-OR-A5JC	TCGA-OR-A5JC-01A-11R-A29S-07	TCGA-OR-A5JC-01A	TP	Primary solid Tumor	A29S	1	1	1	0	1	Yes
26	ACC	Endocrine_tissues	TCGA-OR-A5JD	TCGA-OR-A5JD-01A-11R-A29S-07	TCGA-OR-A5JD-01A	TP	Primary solid Tumor	A29S	1	1	1	0	1	Yes
27	ACC	Endocrine_tissues	TCGA-OR-A5LB	TCGA-OR-A5LB-01A-11R-A29S-07	TCGA-OR-A5LB-01A	TP	Primary solid Tumor	A29S	1	1	1	0	1	Yes
28	ACC	Endocrine_tissues	TCGA-OR-A5LR	TCGA-OR-A5LR-01A-11R-A29S-07	TCGA-OR-A5LR-01A	TP	Primary solid Tumor	A29S	1	1	1	0	1	Yes
29	ACC	Endocrine_tissues	TCGA-OR-A5LC	TCGA-OR-A5LC-01A-11R-A29S-07	TCGA-OR-A5LC-01A	TP	Primary solid Tumor	A29S	1	1	1	0	1	Yes
30	ACC	Endocrine_tissues	TCGA-OR-A5JY	TCGA-OR-A5JY-01A-31R-A29S-07	TCGA-OR-A5JY-01A	TP	Primary solid Tumor	A29S	1	1	1	0	1	Yes
31	ACC	Endocrine_tissues	TCGA-OR-A5JZ	TCGA-OR-A5JZ-01A-11R-A29S-07	TCGA-OR-A5JZ-01A	TP	Primary solid Tumor	A29S	1	1	1	0	1	Yes
32	ACC	Endocrine_tissues	TCGA-OR-A5L3	TCGA-OR-A5L3-01A-11R-A29S-07	TCGA-OR-A5L3-01A	TP	Primary solid Tumor	A29S	1	1	1	0	1	Yes
33	ACC	Endocrine_tissues	TCGA-OR-A5JA	TCGA-OR-A5JA-01A-11R-A29S-07	TCGA-OR-A5JA-01A	TP	Primary solid Tumor	A29S	1	1	1	0	1	Yes
34	ACC	Endocrine_tissues	TCGA-OR-A5JR	TCGA-OR-A5JR-01A-11R-A29S-07	TCGA-OR-A5JR-01A	TP	Primary solid Tumor	A29S	1	1	1	0	1	Yes
35	ACC	Endocrine_tissues	TCGA-OR-A5LK	TCGA-OR-A5LK-01A-11R-A29S-07	TCGA-OR-A5LK-01A	TP	Primary solid Tumor	A29S	1	1	1	0	1	Yes
36	ACC	Endocrine_tissues	TCGA-P6-A5OG	TCGA-P6-A5OG-01A-22R-A29S-07	TCGA-P6-A5OG-01A	TP	Primary solid Tumor	A29S	1	1	1	0	1	Yes
37	ACC	Endocrine_tissues	TCGA-OR-A5K4	TCGA-OR-A5K4-01A-11R-A29S-07	TCGA-OR-A5K4-01A	TP	Primary solid Tumor	A29S	1	1	1	0	1	Yes
38	ACC	Endocrine_tissues	TCGA-PK-A5H8	TCGA-PK-A5H8-01A-11R-A29S-07	TCGA-PK-A5H8-01A	TP	Primary solid Tumor	A29S	1	1	1	0	1	Yes
39	ACC	Endocrine_tissues	TCGA-PK-A5H9	TCGA-PK-A5H9-01A-11R-A29S-07	TCGA-PK-A5H9-01A	TP	Primary solid Tumor	A29S	1	1	1	0	1	Yes
40	ACC	Endocrine_tissues	TCGA-OR-A5JE	TCGA-OR-A5JE-01A-11R-A29S-07	TCGA-OR-A5JE-01A	TP	Primary solid Tumor	A29S	1	1	1	0	1	Yes
41	ACC	Endocrine_tissues	TCGA-OR-A5JI	TCGA-OR-A5JI-01A-11R-A29S-07	TCGA-OR-A5JI-01A	TP	Primary solid Tumor	A29S	1	1	1	0	1	Yes
42	ACC	Endocrine_tissues	TCGA-OR-A5KW	TCGA-OR-A5KW-01A-11R-A29S-07	TCGA-OR-A5KW-01A	TP	Primary solid Tumor	A29S	1	1	1	0	1	Yes
43	ACC	Endocrine_tissues	TCGA-OR-A5KX	TCGA-OR-A5KX-01A-11R-A29S-07	TCGA-OR-A5KX-01A	TP	Primary solid Tumor	A29S	1	1	1	0	1	Yes
44	ACC	Endocrine_tissues	TCGA-OR-A5KY	TCGA-OR-A5KY-01A-11R-A29S-07	TCGA-OR-A5KY-01A	TP	Primary solid Tumor	A29S	1	1	1	0	1	Yes
45	ACC	Endocrine_tissues	TCGA-OR-A5K0	TCGA-OR-A5K0-01A-11R-A29S-07	TCGA-OR-A5K0-01A	TP	Primary solid Tumor	A29S	1	1	1	0	1	Yes
46	ACC	Endocrine_tissues	TCGA-OR-A5JQ	TCGA-OR-A5JQ-01A-11R-A29S-07	TCGA-OR-A5JQ-01A	TP	Primary solid Tumor	A29S	1	1	1	0	1	Yes
47	ACC	Endocrine_tissues	TCGA-OR-A5J7	TCGA-OR-A5J7-01A-11R-A29S-07	TCGA-OR-A5J7-01A	TP	Primary solid Tumor	A29S	1	1	1	0	1	Yes
48	ACC	Endocrine_tissues	TCGA-OR-A5J9	TCGA-OR-A5J9-01A-11R-A29S-07	TCGA-OR-A5J9-01A	TP	Primary solid Tumor	A29S	1	1	1	0	1	Yes
49	ACC	Endocrine_tissues	TCGA-OR-A5LJ	TCGA-OR-A5LJ-01A-11R-A29S-07	TCGA-OR-A5LJ-01A	TP	Primary solid Tumor	A29S	1	1	1	0	1	Yes
50	ACC	Endocrine_tissues	TCGA-P6-A5OF	TCGA-P6-A5OF-01A-11R-A29S-07	TCGA-P6-A5OF-01A	TP	Primary solid Tumor	A29S	1	1	1	0	1	Yes
51	ACC	Endocrine_tissues	TCGA-OR-A5K2	TCGA-OR-A5K2-01A-11R-A29S-07	TCGA-OR-A5K2-01A	TP	Primary solid Tumor	A29S	1	1	1	0	1	Yes
52	ACC	Endocrine_tissues	TCGA-OR-A5JJ	TCGA-OR-A5JJ-01A-11R-A29S-07	TCGA-OR-A5JJ-01A	TP	Primary solid Tumor	A29S	1	1	1	0	1	Yes
53	ACC	Endocrine_tissues	TCGA-OR-A5K9	TCGA-OR-A5K9-01A-11R-A29S-07	TCGA-OR-A5K9-01A	TP	Primary solid Tumor	A29S	1	1	1	0	1	Yes
54	ACC	Endocrine_tissues	TCGA-OR-A5JG	TCGA-OR-A5JG-01A-11R-A29S-07	TCGA-OR-A5JG-01A	TP	Primary solid Tumor	A29S	1	1	1	0	1	Yes
55	ACC	Endocrine_tissues	TCGA-PK-A5HB	TCGA-PK-A5HB-01A-11R-A29S-07	TCGA-PK-A5HB-01A	TP	Primary solid Tumor	A29S	1	1	1	0	1	Yes
56	ACC	Endocrine_tissues	TCGA-OR-A5JO	TCGA-OR-A5JO-01A-11R-A29S-07	TCGA-OR-A5JO-01A	TP	Primary solid Tumor	A29S	1	1	1	0	1	Yes
57	ACC	Endocrine_tissues	TCGA-OR-A5JK	TCGA-OR-A5JK-01A-11R-A29S-07	TCGA-OR-A5JK-01A	TP	Primary solid Tumor	A29S	1	1	1	0	1	Yes
58	ACC	Endocrine_tissues	TCGA-OR-A5JL	TCGA-OR-A5JL-01A-11R-A29S-07	TCGA-OR-A5JL-01A	TP	Primary solid Tumor	A29S	1	1	1	0	1	Yes
59	ACC	Endocrine_tissues	TCGA-OR-A5KZ	TCGA-OR-A5KZ-01A-11R-A29S-07	TCGA-OR-A5KZ-01A	TP	Primary solid Tumor	A29S	1	1	1	0	1	Yes
60	ACC	Endocrine_tissues	TCGA-OU-A5PI	TCGA-OU-A5PI-01A-12R-A29S-07	TCGA-OU-A5PI-01A	TP	Primary solid Tumor	A29S	1	1	1	0	1	Yes
61	ACC	Endocrine_tissues	TCGA-OR-A5JP	TCGA-OR-A5JP-01A-11R-A29S-07	TCGA-OR-A5JP-01A	TP	Primary solid Tumor	A29S	1	1	1	0	1	Yes
62	ACC	Endocrine_tissues	TCGA-OR-A5J8	TCGA-OR-A5J8-01A-11R-A29S-07	TCGA-OR-A5J8-01A	TP	Primary solid Tumor	A29S	1	1	1	0	1	Yes
63	ACC	Endocrine_tissues	TCGA-OR-A5K3	TCGA-OR-A5K3-01A-11R-A29S-07	TCGA-OR-A5K3-01A	TP	Primary solid Tumor	A29S	1	1	1	0	1	Yes
64	ACC	Endocrine_tissues	TCGA-OR-A5J2	TCGA-OR-A5J2-01A-11R-A29S-07	TCGA-OR-A5J2-01A	TP	Primary solid Tumor	A29S	1	1	1	0	1	Yes
65	ACC	Endocrine_tissues	TCGA-OR-A5KU	TCGA-OR-A5KU-01A-11R-A29S-07	TCGA-OR-A5KU-01A	TP	Primary solid Tumor	A29S	1	1	1	0	1	Yes
66	ACC	Endocrine_tissues	TCGA-OR-A5KV	TCGA-OR-A5KV-01A-11R-A29S-07	TCGA-OR-A5KV-01A	TP	Primary solid Tumor	A29S	1	1	1	0	1	Yes
67	ACC	Endocrine_tissues	TCGA-PK-A5HA	TCGA-PK-A5HA-01A-11R-A29S-07	TCGA-PK-A5HA-01A	TP	Primary solid Tumor	A29S	1	1	1	0	1	Yes
68	ACC	Endocrine_tissues	TCGA-OR-A5JM	TCGA-OR-A5JM-01A-11R-A29S-07	TCGA-OR-A5JM-01A	TP	Primary solid Tumor	A29S	1	1	1	0	1	Yes
69	ACC	Endocrine_tissues	TCGA-OR-A5K1	TCGA-OR-A5K1-01A-11R-A29S-07	TCGA-OR-A5K1-01A	TP	Primary solid Tumor	A29S	1	1	1	0	1	Yes
70	ACC	Endocrine_tissues	TCGA-OR-A5LG	TCGA-OR-A5LG-01A-11R-A29S-07	TCGA-OR-A5LG-01A	TP	Primary solid Tumor	A29S	1	1	1	0	1	Yes
71	ACC	Endocrine_tissues	TCGA-OR-A5J3	TCGA-OR-A5J3-01A-11R-A29S-07	TCGA-OR-A5J3-01A	TP	Primary solid Tumor	A29S	1	1	1	0	1	Yes
72	ACC	Endocrine_tissues	TCGA-OR-A5KO	TCGA-OR-A5KO-01A-11R-A29S-07	TCGA-OR-A5KO-01A	TP	Primary solid Tumor	A29S	1	1	1	0	1	Yes
73	ACC	Endocrine_tissues	TCGA-OR-A5J5	TCGA-OR-A5J5-01A-11R-A29S-07	TCGA-OR-A5J5-01A	TP	Primary solid Tumor	A29S	1	1	1	0	1	Yes
74	ACC	Endocrine_tissues	TCGA-OR-A5KT	TCGA-OR-A5KT-01A-11R-A29S-07	TCGA-OR-A5KT-01A	TP	Primary solid Tumor	A29S	1	1	1	0	1	Yes
75	ACC	Endocrine_tissues	TCGA-OR-A5LH	TCGA-OR-A5LH-01A-11R-A29S-07	TCGA-OR-A5LH-01A	TP	Primary solid Tumor	A29S	1	1	1	0	1	Yes
76	ACC	Endocrine_tissues	TCGA-OR-A5J6	TCGA-OR-A5J6-01A-31R-A29S-07	TCGA-OR-A5J6-01A	TP	Primary solid Tumor	A29S	1	1	1	0	1	Yes
77	ACC	Endocrine_tissues	TCGA-OR-A5J1	TCGA-OR-A5J1-01A-11R-A29S-07	TCGA-OR-A5J1-01A	TP	Primary solid Tumor	A29S	1	1	1	0	1	Yes
78	ACC	Endocrine_tissues	TCGA-PA-A5YG	TCGA-PA-A5YG-01A-11R-A29S-07	TCGA-PA-A5YG-01A	TP	Primary solid Tumor	A29S	1	1	1	0	1	Yes
79	ACC	Endocrine_tissues	TCGA-OR-A5LE	TCGA-OR-A5LE-01A-11R-A29S-07	TCGA-OR-A5LE-01A	TP	Primary solid Tumor	A29S	1	1	1	0	1	Yes
80	BLCA	Kidney_urinary_bladder	TCGA-H4-A2HO	TCGA-H4-A2HO-01A-11R-A180-07	TCGA-H4-A2HO-01A	TP	Primary solid Tumor	A180	1	1	1	0	1	Yes
81	BLCA	Kidney_urinary_bladder	TCGA-K4-A5RJ	TCGA-K4-A5RJ-01A-11R-A28M-07	TCGA-K4-A5RJ-01A	TP	Primary solid Tumor	A28M	1	1	1	0	1	Yes
82	BLCA	Kidney_urinary_bladder	TCGA-DK-A1AA	TCGA-DK-A1AA-01A-11R-A13Y-07	TCGA-DK-A1AA-01A	TP	Primary solid Tumor	A13Y	1	1	1	0	1	Yes
83	BLCA	Kidney_urinary_bladder	TCGA-4Z-AA89	TCGA-4Z-AA89-01A-11R-A39I-07	TCGA-4Z-AA89-01A	TP	Primary solid Tumor	A39I	1	1	1	0	1	Yes
84	BLCA	Kidney_urinary_bladder	TCGA-MV-A51V	TCGA-MV-A51V-01A-11R-A26T-07	TCGA-MV-A51V-01A	TP	Primary solid Tumor	A26T	1	1	1	0	1	Yes
85	BLCA	Kidney_urinary_bladder	TCGA-4Z-AA86	TCGA-4Z-AA86-01A-11R-A39I-07	TCGA-4Z-AA86-01A	TP	Primary solid Tumor	A39I	1	1	1	0	1	Yes
86	BLCA	Kidney_urinary_bladder	TCGA-FD-A5C1	TCGA-FD-A5C1-01A-11R-A28M-07	TCGA-FD-A5C1-01A	TP	Primary solid Tumor	A28M	1	1	1	0	1	Yes
87	BLCA	Kidney_urinary_bladder	TCGA-SY-A9G5	TCGA-SY-A9G5-01A-11R-A38B-07	TCGA-SY-A9G5-01A	TP	Primary solid Tumor	A38B	1	1	1	0	1	Yes
88	BLCA	Kidney_urinary_bladder	TCGA-FD-A62S	TCGA-FD-A62S-01A-11R-A30C-07	TCGA-FD-A62S-01A	TP	Primary solid Tumor	A30C	1	1	1	0	1	Yes
89	BLCA	Kidney_urinary_bladder	TCGA-FD-A3B3	TCGA-FD-A3B3-01A-12R-A206-07	TCGA-FD-A3B3-01A	TP	Primary solid Tumor	A206	1	1	1	0	1	Yes
90	BLCA	Kidney_urinary_bladder	TCGA-K4-A6FZ	TCGA-K4-A6FZ-01A-11R-A31N-07	TCGA-K4-A6FZ-01A	TP	Primary solid Tumor	A31N	1	1	1	0	1	Yes
91	BLCA	Kidney_urinary_bladder	TCGA-FD-A62O	TCGA-FD-A62O-01A-11R-A30C-07	TCGA-FD-A62O-01A	TP	Primary solid Tumor	A30C	1	1	1	0	1	Yes
92	BLCA	Kidney_urinary_bladder	TCGA-H4-A2HQ	TCGA-H4-A2HQ-01A-11R-A180-07	TCGA-H4-A2HQ-01A	TP	Primary solid Tumor	A180	1	1	1	0	1	Yes
93	BLCA	Kidney_urinary_bladder	TCGA-4Z-AA82	TCGA-4Z-AA82-01A-11R-A39I-07	TCGA-4Z-AA82-01A	TP	Primary solid Tumor	A39I	1	1	1	0	1	Yes
94	BLCA	Kidney_urinary_bladder	TCGA-KQ-A41O	TCGA-KQ-A41O-01A-12R-A352-07	TCGA-KQ-A41O-01A	TP	Primary solid Tumor	A352	1	1	1	0	1	Yes
95	BLCA	Kidney_urinary_bladder	TCGA-4Z-AA80	TCGA-4Z-AA80-01A-11R-A39I-07	TCGA-4Z-AA80-01A	TP	Primary solid Tumor	A39I	1	1	1	0	1	Yes
96	BLCA	Kidney_urinary_bladder	TCGA-4Z-AA84	TCGA-4Z-AA84-01A-11R-A39I-07	TCGA-4Z-AA84-01A	TP	Primary solid Tumor	A39I	1	1	1	0	1	Yes
97	BLCA	Kidney_urinary_bladder	TCGA-4Z-AA83	TCGA-4Z-AA83-01A-11R-A39I-07	TCGA-4Z-AA83-01A	TP	Primary solid Tumor	A39I	1	1	1	0	1	Yes
98	BLCA	Kidney_urinary_bladder	TCGA-DK-A1AB	TCGA-DK-A1AB-01A-11R-A13Y-07	TCGA-DK-A1AB-01A	TP	Primary solid Tumor	A13Y	1	1	1	0	1	Yes
99	BLCA	Kidney_urinary_bladder	TCGA-K4-A5RI	TCGA-K4-A5RI-11A-11R-A28M-07	TCGA-K4-A5RI-11A	NT	Solid Tissue Normal	A28M	1	1	1	0	1	Yes
100	BLCA	Kidney_urinary_bladder	TCGA-4Z-AA7S	TCGA-4Z-AA7S-01A-11R-A39I-07	TCGA-4Z-AA7S-01A	TP	Primary solid Tumor	A39I	1	1	1	0	1	Yes
101	BLCA	Kidney_urinary_bladder	TCGA-CF-A47T	TCGA-CF-A47T-01A-11R-A23W-07	TCGA-CF-A47T-01A	TP	Primary solid Tumor	A23W	1	1	1	0	1	Yes
102	BLCA	Kidney_urinary_bladder	TCGA-DK-A1AF	TCGA-DK-A1AF-01A-11R-A13Y-07	TCGA-DK-A1AF-01A	TP	Primary solid Tumor	A13Y	1	1	1	0	1	Yes
103	BLCA	Kidney_urinary_bladder	TCGA-FD-A6TC	TCGA-FD-A6TC-01A-21R-A33J-07	TCGA-FD-A6TC-01A	TP	Primary solid Tumor	A33J	1	1	1	0	1	Yes
104	BLCA	Kidney_urinary_bladder	TCGA-FD-A62N	TCGA-FD-A62N-01A-11R-A30C-07	TCGA-FD-A62N-01A	TP	Primary solid Tumor	A30C	1	1	1	0	1	Yes
105	BLCA	Kidney_urinary_bladder	TCGA-FD-A3B4	TCGA-FD-A3B4-01A-12R-A206-07	TCGA-FD-A3B4-01A	TP	Primary solid Tumor	A206	1	1	1	0	1	Yes
106	BLCA	Kidney_urinary_bladder	TCGA-4Z-AA81	TCGA-4Z-AA81-01A-11R-A39I-07	TCGA-4Z-AA81-01A	TP	Primary solid Tumor	A39I	1	1	1	0	1	Yes
107	BLCA	Kidney_urinary_bladder	TCGA-FD-A5C0	TCGA-FD-A5C0-01A-11R-A28M-07	TCGA-FD-A5C0-01A	TP	Primary solid Tumor	A28M	1	1	1	0	1	Yes
108	BLCA	Kidney_urinary_bladder	TCGA-4Z-AA7Y	TCGA-4Z-AA7Y-01A-11R-A39I-07	TCGA-4Z-AA7Y-01A	TP	Primary solid Tumor	A39I	1	1	1	0	1	Yes
109	BLCA	Kidney_urinary_bladder	TCGA-BT-A0YX	TCGA-BT-A0YX-01A-11R-A10U-07	TCGA-BT-A0YX-01A	TP	Primary solid Tumor	A10U	1	1	1	0	1	Yes
110	BLCA	Kidney_urinary_bladder	TCGA-XF-AAMH	TCGA-XF-AAMH-01A-11R-A42T-07	TCGA-XF-AAMH-01A	TP	Primary solid Tumor	A42T	1	1	1	0	1	Yes
111	BLCA	Kidney_urinary_bladder	TCGA-K4-A5RI	TCGA-K4-A5RI-01A-11R-A28M-07	TCGA-K4-A5RI-01A	TP	Primary solid Tumor	A28M	1	1	1	0	1	Yes
112	BLCA	Kidney_urinary_bladder	TCGA-GU-A42Q	TCGA-GU-A42Q-01A-11R-A23W-07	TCGA-GU-A42Q-01A	TP	Primary solid Tumor	A23W	1	1	1	0	1	Yes
113	BLCA	Kidney_urinary_bladder	TCGA-XF-A8HE	TCGA-XF-A8HE-01A-11R-A36F-07	TCGA-XF-A8HE-01A	TP	Primary solid Tumor	A36F	1	1	1	0	1	Yes
114	BLCA	Kidney_urinary_bladder	TCGA-5N-A9KI	TCGA-5N-A9KI-01A-31R-A42T-07	TCGA-5N-A9KI-01A	TP	Primary solid Tumor	A42T	1	1	1	0	1	Yes
115	BLCA	Kidney_urinary_bladder	TCGA-FD-A62P	TCGA-FD-A62P-01A-32R-A30C-07	TCGA-FD-A62P-01A	TP	Primary solid Tumor	A30C	1	1	1	0	1	Yes
116	BLCA	Kidney_urinary_bladder	TCGA-FD-A6TA	TCGA-FD-A6TA-01A-12R-A33J-07	TCGA-FD-A6TA-01A	TP	Primary solid Tumor	A33J	1	1	1	0	1	Yes
117	BLCA	Kidney_urinary_bladder	TCGA-K4-AAQO	TCGA-K4-AAQO-01A-11R-A38B-07	TCGA-K4-AAQO-01A	TP	Primary solid Tumor	A38B	1	1	1	0	1	Yes
118	BLCA	Kidney_urinary_bladder	TCGA-XF-AAMW	TCGA-XF-AAMW-01A-11R-A42T-07	TCGA-XF-AAMW-01A	TP	Primary solid Tumor	A42T	1	1	1	0	1	Yes
119	BLCA	Kidney_urinary_bladder	TCGA-FD-A6TD	TCGA-FD-A6TD-01A-51R-A33J-07	TCGA-FD-A6TD-01A	TP	Primary solid Tumor	A33J	1	1	1	0	1	Yes
120	BLCA	Kidney_urinary_bladder	TCGA-YF-AA3L	TCGA-YF-AA3L-01A-11R-A38B-07	TCGA-YF-AA3L-01A	TP	Primary solid Tumor	A38B	1	1	1	0	1	Yes
121	BLCA	Kidney_urinary_bladder	TCGA-FD-A3B7	TCGA-FD-A3B7-01A-31R-A20F-07	TCGA-FD-A3B7-01A	TP	Primary solid Tumor	A20F	1	1	1	0	1	Yes
122	BLCA	Kidney_urinary_bladder	TCGA-G2-AA3D	TCGA-G2-AA3D-01A-11R-A39I-07	TCGA-G2-AA3D-01A	TP	Primary solid Tumor	A39I	1	1	1	0	1	Yes
123	BLCA	Kidney_urinary_bladder	TCGA-XF-AAMG	TCGA-XF-AAMG-01A-11R-A42T-07	TCGA-XF-AAMG-01A	TP	Primary solid Tumor	A42T	1	1	1	0	1	Yes
124	BLCA	Kidney_urinary_bladder	TCGA-DK-A1A7	TCGA-DK-A1A7-01A-11R-A13Y-07	TCGA-DK-A1A7-01A	TP	Primary solid Tumor	A13Y	1	1	1	0	1	Yes
125	BLCA	Kidney_urinary_bladder	TCGA-FD-A5BZ	TCGA-FD-A5BZ-01A-11R-A28M-07	TCGA-FD-A5BZ-01A	TP	Primary solid Tumor	A28M	1	1	1	0	1	Yes
126	BLCA	Kidney_urinary_bladder	TCGA-DK-A1A6	TCGA-DK-A1A6-01A-11R-A13Y-07	TCGA-DK-A1A6-01A	TP	Primary solid Tumor	A13Y	1	1	1	0	1	Yes
127	BLCA	Kidney_urinary_bladder	TCGA-DK-AA6W	TCGA-DK-AA6W-01A-12R-A39I-07	TCGA-DK-AA6W-01A	TP	Primary solid Tumor	A39I	1	1	1	0	1	Yes
128	BLCA	Kidney_urinary_bladder	TCGA-ZF-AA4U	TCGA-ZF-AA4U-01A-11R-A38B-07	TCGA-ZF-AA4U-01A	TP	Primary solid Tumor	A38B	1	1	1	0	1	Yes
129	BLCA	Kidney_urinary_bladder	TCGA-GU-A766	TCGA-GU-A766-01A-11R-A32O-07	TCGA-GU-A766-01A	TP	Primary solid Tumor	A32O	1	1	1	0	1	Yes
130	BLCA	Kidney_urinary_bladder	TCGA-DK-A1AG	TCGA-DK-A1AG-01A-11R-A13Y-07	TCGA-DK-A1AG-01A	TP	Primary solid Tumor	A13Y	1	1	1	0	1	Yes
131	BLCA	Kidney_urinary_bladder	TCGA-DK-A1A3	TCGA-DK-A1A3-01A-11R-A13Y-07	TCGA-DK-A1A3-01A	TP	Primary solid Tumor	A13Y	1	1	1	0	1	Yes
132	BLCA	Kidney_urinary_bladder	TCGA-E5-A4TZ	TCGA-E5-A4TZ-01A-11R-A31N-07	TCGA-E5-A4TZ-01A	TP	Primary solid Tumor	A31N	1	1	1	0	1	Yes
133	BLCA	Kidney_urinary_bladder	TCGA-E5-A4U1	TCGA-E5-A4U1-01A-11R-A31N-07	TCGA-E5-A4U1-01A	TP	Primary solid Tumor	A31N	1	1	1	0	1	Yes
134	BLCA	Kidney_urinary_bladder	TCGA-YF-AA3M	TCGA-YF-AA3M-01A-11R-A42T-07	TCGA-YF-AA3M-01A	TP	Primary solid Tumor	A42T	1	1	1	0	1	Yes
135	BLCA	Kidney_urinary_bladder	TCGA-FD-A3B6	TCGA-FD-A3B6-01A-21R-A20F-07	TCGA-FD-A3B6-01A	TP	Primary solid Tumor	A20F	1	1	1	0	1	Yes
136	BLCA	Kidney_urinary_bladder	TCGA-4Z-AA7R	TCGA-4Z-AA7R-01A-11R-A39I-07	TCGA-4Z-AA7R-01A	TP	Primary solid Tumor	A39I	1	1	1	0	1	Yes
137	BLCA	Kidney_urinary_bladder	TCGA-BL-A0C8	TCGA-BL-A0C8-01B-04R-A277-07	TCGA-BL-A0C8-01B	TP	Primary solid Tumor	A277	0	1	0	0	1	No
138	BLCA	Kidney_urinary_bladder	TCGA-FD-A3NA	TCGA-FD-A3NA-01A-11R-A21D-07	TCGA-FD-A3NA-01A	TP	Primary solid Tumor	A21D	1	1	1	0	1	Yes
139	BLCA	Kidney_urinary_bladder	TCGA-GU-A42P	TCGA-GU-A42P-01A-11R-A23W-07	TCGA-GU-A42P-01A	TP	Primary solid Tumor	A23W	1	1	1	0	1	Yes
140	BLCA	Kidney_urinary_bladder	TCGA-E7-A3X6	TCGA-E7-A3X6-01A-12R-A22U-07	TCGA-E7-A3X6-01A	TP	Primary solid Tumor	A22U	1	1	1	0	1	Yes
141	BLCA	Kidney_urinary_bladder	TCGA-E7-A3Y1	TCGA-E7-A3Y1-01A-11R-A22U-07	TCGA-E7-A3Y1-01A	TP	Primary solid Tumor	A22U	1	1	1	0	1	Yes
142	BLCA	Kidney_urinary_bladder	TCGA-GD-A3OP	TCGA-GD-A3OP-01A-21R-A220-07	TCGA-GD-A3OP-01A	TP	Primary solid Tumor	A220	1	1	1	0	1	Yes
143	BLCA	Kidney_urinary_bladder	TCGA-GD-A3OQ	TCGA-GD-A3OQ-11A-21R-A220-07	TCGA-GD-A3OQ-11A	NT	Solid Tissue Normal	A220	1	1	1	0	1	Yes
144	BLCA	Kidney_urinary_bladder	TCGA-XF-AAMT	TCGA-XF-AAMT-01A-11R-A42T-07	TCGA-XF-AAMT-01A	TP	Primary solid Tumor	A42T	1	1	1	0	1	Yes
145	BLCA	Kidney_urinary_bladder	TCGA-GV-A40E	TCGA-GV-A40E-01A-12R-A23N-07	TCGA-GV-A40E-01A	TP	Primary solid Tumor	A23N	1	1	1	0	1	Yes
146	BLCA	Kidney_urinary_bladder	TCGA-DK-A1A5	TCGA-DK-A1A5-01A-11R-A13Y-07	TCGA-DK-A1A5-01A	TP	Primary solid Tumor	A13Y	1	1	1	0	1	Yes
147	BLCA	Kidney_urinary_bladder	TCGA-KQ-A41N	TCGA-KQ-A41N-01A-11R-A33J-07	TCGA-KQ-A41N-01A	TP	Primary solid Tumor	A33J	1	1	1	0	1	Yes
148	BLCA	Kidney_urinary_bladder	TCGA-YC-A8S6	TCGA-YC-A8S6-01A-31R-A38B-07	TCGA-YC-A8S6-01A	TP	Primary solid Tumor	A38B	1	1	1	0	1	Yes
149	BLCA	Kidney_urinary_bladder	TCGA-KQ-A41S	TCGA-KQ-A41S-01A-12R-A33J-07	TCGA-KQ-A41S-01A	TP	Primary solid Tumor	A33J	1	1	1	0	1	Yes
150	BLCA	Kidney_urinary_bladder	TCGA-SY-A9G0	TCGA-SY-A9G0-01A-12R-A38B-07	TCGA-SY-A9G0-01A	TP	Primary solid Tumor	A38B	1	1	1	0	1	Yes
151	BLCA	Kidney_urinary_bladder	TCGA-CF-A47S	TCGA-CF-A47S-01A-11R-A23W-07	TCGA-CF-A47S-01A	TP	Primary solid Tumor	A23W	1	1	1	0	1	Yes
152	BLCA	Kidney_urinary_bladder	TCGA-FD-A5BY	TCGA-FD-A5BY-01A-31R-A28M-07	TCGA-FD-A5BY-01A	TP	Primary solid Tumor	A28M	1	1	1	0	1	Yes
153	BLCA	Kidney_urinary_bladder	TCGA-DK-AA6U	TCGA-DK-AA6U-01A-11R-A39I-07	TCGA-DK-AA6U-01A	TP	Primary solid Tumor	A39I	1	1	1	0	1	Yes
154	BLCA	Kidney_urinary_bladder	TCGA-ZF-AA4N	TCGA-ZF-AA4N-01A-11R-A38B-07	TCGA-ZF-AA4N-01A	TP	Primary solid Tumor	A38B	1	1	1	0	1	Yes
155	BLCA	Kidney_urinary_bladder	TCGA-E7-A4IJ	TCGA-E7-A4IJ-01A-31R-A26T-07	TCGA-E7-A4IJ-01A	TP	Primary solid Tumor	A26T	1	1	1	0	1	Yes
156	BLCA	Kidney_urinary_bladder	TCGA-GU-A764	TCGA-GU-A764-01A-11R-A352-07	TCGA-GU-A764-01A	TP	Primary solid Tumor	A352	1	1	1	0	1	Yes
157	BLCA	Kidney_urinary_bladder	TCGA-E7-A541	TCGA-E7-A541-01A-11R-A26T-07	TCGA-E7-A541-01A	TP	Primary solid Tumor	A26T	1	1	1	0	1	Yes
158	BLCA	Kidney_urinary_bladder	TCGA-E5-A2PC	TCGA-E5-A2PC-01A-11R-A206-07	TCGA-E5-A2PC-01A	TP	Primary solid Tumor	A206	1	1	1	0	1	Yes
159	BLCA	Kidney_urinary_bladder	TCGA-K4-A83P	TCGA-K4-A83P-01A-11R-A352-07	TCGA-K4-A83P-01A	TP	Primary solid Tumor	A352	1	1	1	0	1	Yes
160	BLCA	Kidney_urinary_bladder	TCGA-G2-AA3F	TCGA-G2-AA3F-01A-12R-A42T-07	TCGA-G2-AA3F-01A	TP	Primary solid Tumor	A42T	1	1	1	0	1	Yes
161	BLCA	Kidney_urinary_bladder	TCGA-CF-A5U8	TCGA-CF-A5U8-01A-11R-A28M-07	TCGA-CF-A5U8-01A	TP	Primary solid Tumor	A28M	1	1	1	0	1	Yes
162	BLCA	Kidney_urinary_bladder	TCGA-YC-A9TC	TCGA-YC-A9TC-01A-22R-A39I-07	TCGA-YC-A9TC-01A	TP	Primary solid Tumor	A39I	1	1	1	0	1	Yes
163	BLCA	Kidney_urinary_bladder	TCGA-CF-A27C	TCGA-CF-A27C-01A-11R-A16R-07	TCGA-CF-A27C-01A	TP	Primary solid Tumor	A16R	1	1	1	0	1	Yes
164	BLCA	Kidney_urinary_bladder	TCGA-XF-AAN2	TCGA-XF-AAN2-01A-11R-A42T-07	TCGA-XF-AAN2-01A	TP	Primary solid Tumor	A42T	1	1	1	0	1	Yes
165	BLCA	Kidney_urinary_bladder	TCGA-XF-A8HB	TCGA-XF-A8HB-01A-11R-A36F-07	TCGA-XF-A8HB-01A	TP	Primary solid Tumor	A36F	1	1	1	0	1	Yes
166	BLCA	Kidney_urinary_bladder	TCGA-FD-A3N6	TCGA-FD-A3N6-01A-11R-A21D-07	TCGA-FD-A3N6-01A	TP	Primary solid Tumor	A21D	1	1	1	0	1	Yes
167	BLCA	Kidney_urinary_bladder	TCGA-XF-A8HD	TCGA-XF-A8HD-01A-11R-A36F-07	TCGA-XF-A8HD-01A	TP	Primary solid Tumor	A36F	1	1	1	0	1	Yes
168	BLCA	Kidney_urinary_bladder	TCGA-K4-A5RH	TCGA-K4-A5RH-01A-11R-A30C-07	TCGA-K4-A5RH-01A	TP	Primary solid Tumor	A30C	1	1	1	0	1	Yes
169	BLCA	Kidney_urinary_bladder	TCGA-ZF-AA4V	TCGA-ZF-AA4V-01A-11R-A38B-07	TCGA-ZF-AA4V-01A	TP	Primary solid Tumor	A38B	1	1	1	0	1	Yes
170	BLCA	Kidney_urinary_bladder	TCGA-ZF-AA4W	TCGA-ZF-AA4W-01A-12R-A38B-07	TCGA-ZF-AA4W-01A	TP	Primary solid Tumor	A38B	1	1	1	0	1	Yes
171	BLCA	Kidney_urinary_bladder	TCGA-GU-A763	TCGA-GU-A763-01A-11R-A32O-07	TCGA-GU-A763-01A	TP	Primary solid Tumor	A32O	1	1	1	0	1	Yes
172	BLCA	Kidney_urinary_bladder	TCGA-GU-AATP	TCGA-GU-AATP-01A-11R-A39I-07	TCGA-GU-AATP-01A	TP	Primary solid Tumor	A39I	1	1	1	0	1	Yes
173	BLCA	Kidney_urinary_bladder	TCGA-DK-AA77	TCGA-DK-AA77-01A-11R-A39I-07	TCGA-DK-AA77-01A	TP	Primary solid Tumor	A39I	1	1	1	0	1	Yes
174	BLCA	Kidney_urinary_bladder	TCGA-FT-A61P	TCGA-FT-A61P-01A-11R-A30C-07	TCGA-FT-A61P-01A	TP	Primary solid Tumor	A30C	1	1	1	0	1	Yes
175	BLCA	Kidney_urinary_bladder	TCGA-DK-A2I2	TCGA-DK-A2I2-01A-11R-A180-07	TCGA-DK-A2I2-01A	TP	Primary solid Tumor	A180	1	1	1	0	1	Yes
176	BLCA	Kidney_urinary_bladder	TCGA-BT-A0S7	TCGA-BT-A0S7-01A-11R-A10U-07	TCGA-BT-A0S7-01A	TP	Primary solid Tumor	A10U	1	1	1	0	1	Yes
177	BLCA	Kidney_urinary_bladder	TCGA-4Z-AA7W	TCGA-4Z-AA7W-01A-11R-A39I-07	TCGA-4Z-AA7W-01A	TP	Primary solid Tumor	A39I	1	1	1	0	1	Yes
178	BLCA	Kidney_urinary_bladder	TCGA-XF-A9T8	TCGA-XF-A9T8-01A-11R-A39I-07	TCGA-XF-A9T8-01A	TP	Primary solid Tumor	A39I	1	1	1	0	1	Yes
179	BLCA	Kidney_urinary_bladder	TCGA-GV-A3QH	TCGA-GV-A3QH-01A-11R-A220-07	TCGA-GV-A3QH-01A	TP	Primary solid Tumor	A220	1	1	1	0	1	Yes
180	BLCA	Kidney_urinary_bladder	TCGA-BT-A42F	TCGA-BT-A42F-01A-11R-A23W-07	TCGA-BT-A42F-01A	TP	Primary solid Tumor	A23W	1	1	1	0	1	Yes
181	BLCA	Kidney_urinary_bladder	TCGA-CF-A9FL	TCGA-CF-A9FL-01A-11R-A38B-07	TCGA-CF-A9FL-01A	TP	Primary solid Tumor	A38B	1	1	1	0	1	Yes
182	BLCA	Kidney_urinary_bladder	TCGA-BL-A0C8	TCGA-BL-A0C8-01A-11R-A10U-07	TCGA-BL-A0C8-01A	TP	Primary solid Tumor	A10U	1	1	1	0	1	Yes
183	BLCA	Kidney_urinary_bladder	TCGA-GU-A42R	TCGA-GU-A42R-01A-11R-A23N-07	TCGA-GU-A42R-01A	TP	Primary solid Tumor	A23N	1	1	1	0	1	Yes
184	BLCA	Kidney_urinary_bladder	TCGA-CF-A47V	TCGA-CF-A47V-01A-11R-A23W-07	TCGA-CF-A47V-01A	TP	Primary solid Tumor	A23W	1	1	1	0	1	Yes
185	BLCA	Kidney_urinary_bladder	TCGA-G2-A3VY	TCGA-G2-A3VY-01A-11R-A22U-07	TCGA-G2-A3VY-01A	TP	Primary solid Tumor	A22U	1	1	1	0	1	Yes
186	BLCA	Kidney_urinary_bladder	TCGA-FT-A3EE	TCGA-FT-A3EE-01A-11R-A206-07	TCGA-FT-A3EE-01A	TP	Primary solid Tumor	A206	1	1	1	0	1	Yes
187	BLCA	Kidney_urinary_bladder	TCGA-ZF-AA53	TCGA-ZF-AA53-01A-11R-A39I-07	TCGA-ZF-AA53-01A	TP	Primary solid Tumor	A39I	1	1	1	0	1	Yes
188	BLCA	Kidney_urinary_bladder	TCGA-DK-AA6Q	TCGA-DK-AA6Q-01A-11R-A39I-07	TCGA-DK-AA6Q-01A	TP	Primary solid Tumor	A39I	1	1	1	0	1	Yes
189	BLCA	Kidney_urinary_bladder	TCGA-GV-A6ZA	TCGA-GV-A6ZA-01A-12R-A33J-07	TCGA-GV-A6ZA-01A	TP	Primary solid Tumor	A33J	1	1	1	0	1	Yes
190	BLCA	Kidney_urinary_bladder	TCGA-CF-A8HX	TCGA-CF-A8HX-01A-11R-A36F-07	TCGA-CF-A8HX-01A	TP	Primary solid Tumor	A36F	1	1	1	0	1	Yes
191	BLCA	Kidney_urinary_bladder	TCGA-KQ-A41P	TCGA-KQ-A41P-01A-12R-A33J-07	TCGA-KQ-A41P-01A	TP	Primary solid Tumor	A33J	1	1	1	0	1	Yes
192	BLCA	Kidney_urinary_bladder	TCGA-XF-AAME	TCGA-XF-AAME-01A-12R-A42T-07	TCGA-XF-AAME-01A	TP	Primary solid Tumor	A42T	1	1	1	0	1	Yes
193	BLCA	Kidney_urinary_bladder	TCGA-XF-A8HC	TCGA-XF-A8HC-01A-11R-A36F-07	TCGA-XF-A8HC-01A	TP	Primary solid Tumor	A36F	1	1	1	0	1	Yes
194	BLCA	Kidney_urinary_bladder	TCGA-K4-A54R	TCGA-K4-A54R-01A-11R-A26T-07	TCGA-K4-A54R-01A	TP	Primary solid Tumor	A26T	1	1	1	0	1	Yes
195	BLCA	Kidney_urinary_bladder	TCGA-ZF-A9RN	TCGA-ZF-A9RN-01A-11R-A42T-07	TCGA-ZF-A9RN-01A	TP	Primary solid Tumor	A42T	1	1	1	0	1	Yes
196	BLCA	Kidney_urinary_bladder	TCGA-GD-A2C5	TCGA-GD-A2C5-01A-12R-A180-07	TCGA-GD-A2C5-01A	TP	Primary solid Tumor	A180	1	1	1	0	1	Yes
197	BLCA	Kidney_urinary_bladder	TCGA-5N-A9KM	TCGA-5N-A9KM-01A-11R-A42T-07	TCGA-5N-A9KM-01A	TP	Primary solid Tumor	A42T	1	1	1	0	1	Yes
198	BLCA	Kidney_urinary_bladder	TCGA-XF-AAMR	TCGA-XF-AAMR-01A-31R-A42T-07	TCGA-XF-AAMR-01A	TP	Primary solid Tumor	A42T	1	1	1	0	1	Yes
199	BLCA	Kidney_urinary_bladder	TCGA-ZF-AA52	TCGA-ZF-AA52-01A-12R-A39I-07	TCGA-ZF-AA52-01A	TP	Primary solid Tumor	A39I	1	1	1	0	1	Yes
200	BLCA	Kidney_urinary_bladder	TCGA-GU-AATQ	TCGA-GU-AATQ-01A-11R-A39I-07	TCGA-GU-AATQ-01A	TP	Primary solid Tumor	A39I	1	1	1	0	1	Yes
201	BLCA	Kidney_urinary_bladder	TCGA-XF-AAMX	TCGA-XF-AAMX-01A-11R-A42T-07	TCGA-XF-AAMX-01A	TP	Primary solid Tumor	A42T	1	1	1	0	1	Yes
202	BLCA	Kidney_urinary_bladder	TCGA-FD-A6TE	TCGA-FD-A6TE-01A-12R-A33J-07	TCGA-FD-A6TE-01A	TP	Primary solid Tumor	A33J	1	1	1	0	1	Yes
203	BLCA	Kidney_urinary_bladder	TCGA-4Z-AA7Q	TCGA-4Z-AA7Q-01A-11R-A39I-07	TCGA-4Z-AA7Q-01A	TP	Primary solid Tumor	A39I	1	1	1	0	1	Yes
204	BLCA	Kidney_urinary_bladder	TCGA-GV-A3QF	TCGA-GV-A3QF-01A-31R-A22U-07	TCGA-GV-A3QF-01A	TP	Primary solid Tumor	A22U	1	1	1	0	1	Yes
205	BLCA	Kidney_urinary_bladder	TCGA-KQ-A41R	TCGA-KQ-A41R-01A-21R-A352-07	TCGA-KQ-A41R-01A	TP	Primary solid Tumor	A352	1	1	1	0	1	Yes
206	BLCA	Kidney_urinary_bladder	TCGA-DK-A6B2	TCGA-DK-A6B2-01A-11R-A30C-07	TCGA-DK-A6B2-01A	TP	Primary solid Tumor	A30C	1	1	1	0	1	Yes
207	BLCA	Kidney_urinary_bladder	TCGA-XF-AAN3	TCGA-XF-AAN3-01A-11R-A42T-07	TCGA-XF-AAN3-01A	TP	Primary solid Tumor	A42T	1	1	1	0	1	Yes
208	BLCA	Kidney_urinary_bladder	TCGA-XF-AAN4	TCGA-XF-AAN4-01A-11R-A42T-07	TCGA-XF-AAN4-01A	TP	Primary solid Tumor	A42T	1	1	1	0	1	Yes
209	BLCA	Kidney_urinary_bladder	TCGA-XF-AAN5	TCGA-XF-AAN5-01A-11R-A42T-07	TCGA-XF-AAN5-01A	TP	Primary solid Tumor	A42T	1	1	1	0	1	Yes
210	BLCA	Kidney_urinary_bladder	TCGA-G2-AA3C	TCGA-G2-AA3C-01A-21R-A39I-07	TCGA-G2-AA3C-01A	TP	Primary solid Tumor	A39I	1	1	1	0	1	Yes
211	BLCA	Kidney_urinary_bladder	TCGA-FD-A6TK	TCGA-FD-A6TK-01A-42R-A33J-07	TCGA-FD-A6TK-01A	TP	Primary solid Tumor	A33J	1	1	1	0	1	Yes
212	BLCA	Kidney_urinary_bladder	TCGA-E7-A5KE	TCGA-E7-A5KE-01A-11R-A28M-07	TCGA-E7-A5KE-01A	TP	Primary solid Tumor	A28M	1	1	1	0	1	Yes
213	BLCA	Kidney_urinary_bladder	TCGA-G2-A3IE	TCGA-G2-A3IE-01A-11R-A20F-07	TCGA-G2-A3IE-01A	TP	Primary solid Tumor	A20F	1	1	1	0	1	Yes
214	BLCA	Kidney_urinary_bladder	TCGA-DK-AA6P	TCGA-DK-AA6P-01A-11R-A39I-07	TCGA-DK-AA6P-01A	TP	Primary solid Tumor	A39I	1	1	1	0	1	Yes
215	BLCA	Kidney_urinary_bladder	TCGA-XF-A9T3	TCGA-XF-A9T3-01A-11R-A42T-07	TCGA-XF-A9T3-01A	TP	Primary solid Tumor	A42T	1	1	1	0	1	Yes
216	BLCA	Kidney_urinary_bladder	TCGA-XF-AAMZ	TCGA-XF-AAMZ-01A-11R-A42T-07	TCGA-XF-AAMZ-01A	TP	Primary solid Tumor	A42T	1	1	1	0	1	Yes
217	BLCA	Kidney_urinary_bladder	TCGA-GV-A40G	TCGA-GV-A40G-01A-11R-A23N-07	TCGA-GV-A40G-01A	TP	Primary solid Tumor	A23N	1	1	1	0	1	Yes
218	BLCA	Kidney_urinary_bladder	TCGA-LC-A66R	TCGA-LC-A66R-01A-41R-A30C-07	TCGA-LC-A66R-01A	TP	Primary solid Tumor	A30C	1	1	1	0	1	Yes
219	BLCA	Kidney_urinary_bladder	TCGA-HQ-A5ND	TCGA-HQ-A5ND-01A-11R-A26T-07	TCGA-HQ-A5ND-01A	TP	Primary solid Tumor	A26T	1	1	1	0	1	Yes
220	BLCA	Kidney_urinary_bladder	TCGA-HQ-A5NE	TCGA-HQ-A5NE-01A-12R-A28M-07	TCGA-HQ-A5NE-01A	TP	Primary solid Tumor	A28M	1	1	1	0	1	Yes
221	BLCA	Kidney_urinary_bladder	TCGA-FD-A5BX	TCGA-FD-A5BX-01A-11R-A26T-07	TCGA-FD-A5BX-01A	TP	Primary solid Tumor	A26T	1	1	1	0	1	Yes
222	BLCA	Kidney_urinary_bladder	TCGA-CF-A3MH	TCGA-CF-A3MH-01A-11R-A20F-07	TCGA-CF-A3MH-01A	TP	Primary solid Tumor	A20F	1	1	1	0	1	Yes
223	BLCA	Kidney_urinary_bladder	TCGA-ZF-AA4R	TCGA-ZF-AA4R-01A-11R-A38B-07	TCGA-ZF-AA4R-01A	TP	Primary solid Tumor	A38B	1	1	1	0	1	Yes
224	BLCA	Kidney_urinary_bladder	TCGA-XF-AAMJ	TCGA-XF-AAMJ-01A-11R-A42T-07	TCGA-XF-AAMJ-01A	TP	Primary solid Tumor	A42T	1	1	1	0	1	Yes
225	BLCA	Kidney_urinary_bladder	TCGA-K4-A3WS	TCGA-K4-A3WS-01A-11R-A22U-07	TCGA-K4-A3WS-01A	TP	Primary solid Tumor	A22U	1	1	1	0	1	Yes
226	BLCA	Kidney_urinary_bladder	TCGA-DK-A1AC	TCGA-DK-A1AC-01A-11R-A13Y-07	TCGA-DK-A1AC-01A	TP	Primary solid Tumor	A13Y	1	1	1	0	1	Yes
227	BLCA	Kidney_urinary_bladder	TCGA-DK-A1AD	TCGA-DK-A1AD-01A-11R-A13Y-07	TCGA-DK-A1AD-01A	TP	Primary solid Tumor	A13Y	1	1	1	0	1	Yes
228	BLCA	Kidney_urinary_bladder	TCGA-DK-A1AE	TCGA-DK-A1AE-01A-11R-A13Y-07	TCGA-DK-A1AE-01A	TP	Primary solid Tumor	A13Y	1	1	1	0	1	Yes
229	BLCA	Kidney_urinary_bladder	TCGA-XF-A9T4	TCGA-XF-A9T4-01A-11R-A39I-07	TCGA-XF-A9T4-01A	TP	Primary solid Tumor	A39I	1	1	1	0	1	Yes
230	BLCA	Kidney_urinary_bladder	TCGA-DK-A2I1	TCGA-DK-A2I1-01A-11R-A180-07	TCGA-DK-A2I1-01A	TP	Primary solid Tumor	A180	1	1	1	0	1	Yes
231	BLCA	Kidney_urinary_bladder	TCGA-DK-A2I4	TCGA-DK-A2I4-01A-11R-A21D-07	TCGA-DK-A2I4-01A	TP	Primary solid Tumor	A21D	1	1	1	0	1	Yes
232	BLCA	Kidney_urinary_bladder	TCGA-DK-A2I6	TCGA-DK-A2I6-01A-12R-A18C-07	TCGA-DK-A2I6-01A	TP	Primary solid Tumor	A18C	1	1	1	0	1	Yes
233	BLCA	Kidney_urinary_bladder	TCGA-FD-A6TF	TCGA-FD-A6TF-01A-52R-A32O-07	TCGA-FD-A6TF-01A	TP	Primary solid Tumor	A32O	1	1	1	0	1	Yes
234	BLCA	Kidney_urinary_bladder	TCGA-DK-A3IL	TCGA-DK-A3IL-01A-11R-A20F-07	TCGA-DK-A3IL-01A	TP	Primary solid Tumor	A20F	1	1	1	0	1	Yes
235	BLCA	Kidney_urinary_bladder	TCGA-UY-A78K	TCGA-UY-A78K-01A-11R-A33J-07	TCGA-UY-A78K-01A	TP	Primary solid Tumor	A33J	1	1	1	0	1	Yes
236	BLCA	Kidney_urinary_bladder	TCGA-UY-A78L	TCGA-UY-A78L-01A-12R-A33J-07	TCGA-UY-A78L-01A	TP	Primary solid Tumor	A33J	1	1	1	0	1	Yes
237	BLCA	Kidney_urinary_bladder	TCGA-UY-A78M	TCGA-UY-A78M-01A-21R-A352-07	TCGA-UY-A78M-01A	TP	Primary solid Tumor	A352	1	1	1	0	1	Yes
238	BLCA	Kidney_urinary_bladder	TCGA-CF-A47W	TCGA-CF-A47W-01A-11R-A23W-07	TCGA-CF-A47W-01A	TP	Primary solid Tumor	A23W	1	1	1	0	1	Yes
239	BLCA	Kidney_urinary_bladder	TCGA-UY-A78P	TCGA-UY-A78P-01A-12R-A36F-07	TCGA-UY-A78P-01A	TP	Primary solid Tumor	A36F	1	1	1	0	1	Yes
240	BLCA	Kidney_urinary_bladder	TCGA-GU-A767	TCGA-GU-A767-01A-11R-A32O-07	TCGA-GU-A767-01A	TP	Primary solid Tumor	A32O	1	1	1	0	1	Yes
241	BLCA	Kidney_urinary_bladder	TCGA-GU-AATO	TCGA-GU-AATO-01A-11R-A39I-07	TCGA-GU-AATO-01A	TP	Primary solid Tumor	A39I	1	1	1	0	1	Yes
242	BLCA	Kidney_urinary_bladder	TCGA-DK-A2HX	TCGA-DK-A2HX-01A-12R-A18C-07	TCGA-DK-A2HX-01A	TP	Primary solid Tumor	A18C	1	1	1	0	1	Yes
243	BLCA	Kidney_urinary_bladder	TCGA-GV-A3JZ	TCGA-GV-A3JZ-01A-11R-A21D-07	TCGA-GV-A3JZ-01A	TP	Primary solid Tumor	A21D	1	1	1	0	1	Yes
244	BLCA	Kidney_urinary_bladder	TCGA-DK-A6B0	TCGA-DK-A6B0-01A-11R-A31N-07	TCGA-DK-A6B0-01A	TP	Primary solid Tumor	A31N	1	1	1	0	1	Yes
245	BLCA	Kidney_urinary_bladder	TCGA-GV-A3QG	TCGA-GV-A3QG-01A-11R-A220-07	TCGA-GV-A3QG-01A	TP	Primary solid Tumor	A220	1	1	1	0	1	Yes
246	BLCA	Kidney_urinary_bladder	TCGA-E7-A6MF	TCGA-E7-A6MF-01A-12R-A32O-07	TCGA-E7-A6MF-01A	TP	Primary solid Tumor	A32O	1	1	1	0	1	Yes
247	BLCA	Kidney_urinary_bladder	TCGA-DK-A6B5	TCGA-DK-A6B5-01A-11R-A31N-07	TCGA-DK-A6B5-01A	TP	Primary solid Tumor	A31N	1	1	1	0	1	Yes
248	BLCA	Kidney_urinary_bladder	TCGA-E7-A7DV	TCGA-E7-A7DV-01A-11R-A33J-07	TCGA-E7-A7DV-01A	TP	Primary solid Tumor	A33J	1	1	1	0	1	Yes
249	BLCA	Kidney_urinary_bladder	TCGA-DK-A6B6	TCGA-DK-A6B6-01A-11R-A30C-07	TCGA-DK-A6B6-01A	TP	Primary solid Tumor	A30C	1	1	1	0	1	Yes
250	BLCA	Kidney_urinary_bladder	TCGA-GV-A3QK	TCGA-GV-A3QK-01B-11R-A23N-07	TCGA-GV-A3QK-01B	TP	Primary solid Tumor	A23N	1	1	1	0	1	Yes
251	BLCA	Kidney_urinary_bladder	TCGA-E7-A4XJ	TCGA-E7-A4XJ-01A-11R-A26T-07	TCGA-E7-A4XJ-01A	TP	Primary solid Tumor	A26T	1	1	1	0	1	Yes
252	BLCA	Kidney_urinary_bladder	TCGA-G2-A3IB	TCGA-G2-A3IB-01A-11R-A20F-07	TCGA-G2-A3IB-01A	TP	Primary solid Tumor	A20F	1	1	1	0	1	Yes
253	BLCA	Kidney_urinary_bladder	TCGA-E7-A7XN	TCGA-E7-A7XN-01A-11R-A352-07	TCGA-E7-A7XN-01A	TP	Primary solid Tumor	A352	1	1	1	0	1	Yes
254	BLCA	Kidney_urinary_bladder	TCGA-GC-A3RB	TCGA-GC-A3RB-01A-12R-A220-07	TCGA-GC-A3RB-01A	TP	Primary solid Tumor	A220	1	1	1	0	1	Yes
255	BLCA	Kidney_urinary_bladder	TCGA-LT-A8JT	TCGA-LT-A8JT-01A-11R-A36F-07	TCGA-LT-A8JT-01A	TP	Primary solid Tumor	A36F	1	1	1	0	1	Yes
256	BLCA	Kidney_urinary_bladder	TCGA-CF-A1HR	TCGA-CF-A1HR-01A-11R-A13Y-07	TCGA-CF-A1HR-01A	TP	Primary solid Tumor	A13Y	1	1	1	0	1	Yes
257	BLCA	Kidney_urinary_bladder	TCGA-YC-A89H	TCGA-YC-A89H-01A-11R-A36F-07	TCGA-YC-A89H-01A	TP	Primary solid Tumor	A36F	1	1	1	0	1	Yes
258	BLCA	Kidney_urinary_bladder	TCGA-K4-A3WV	TCGA-K4-A3WV-01A-11R-A22U-07	TCGA-K4-A3WV-01A	TP	Primary solid Tumor	A22U	1	1	1	0	1	Yes
259	BLCA	Kidney_urinary_bladder	TCGA-CF-A3MF	TCGA-CF-A3MF-01A-12R-A21D-07	TCGA-CF-A3MF-01A	TP	Primary solid Tumor	A21D	1	1	1	0	1	Yes
260	BLCA	Kidney_urinary_bladder	TCGA-CF-A3MG	TCGA-CF-A3MG-01A-11R-A20F-07	TCGA-CF-A3MG-01A	TP	Primary solid Tumor	A20F	1	1	1	0	1	Yes
261	BLCA	Kidney_urinary_bladder	TCGA-CF-A3MI	TCGA-CF-A3MI-01A-11R-A20F-07	TCGA-CF-A3MI-01A	TP	Primary solid Tumor	A20F	1	1	1	0	1	Yes
262	BLCA	Kidney_urinary_bladder	TCGA-BT-A42C	TCGA-BT-A42C-01A-11R-A23N-07	TCGA-BT-A42C-01A	TP	Primary solid Tumor	A23N	1	1	1	0	1	Yes
263	BLCA	Kidney_urinary_bladder	TCGA-DK-AA6T	TCGA-DK-AA6T-01A-11R-A39I-07	TCGA-DK-AA6T-01A	TP	Primary solid Tumor	A39I	1	1	1	0	1	Yes
264	BLCA	Kidney_urinary_bladder	TCGA-GC-A6I3	TCGA-GC-A6I3-11A-11R-A31N-07	TCGA-GC-A6I3-11A	NT	Solid Tissue Normal	A31N	1	1	1	0	1	Yes
265	BLCA	Kidney_urinary_bladder	TCGA-XF-AAML	TCGA-XF-AAML-01A-11R-A42T-07	TCGA-XF-AAML-01A	TP	Primary solid Tumor	A42T	1	1	1	0	1	Yes
266	BLCA	Kidney_urinary_bladder	TCGA-K4-A6MB	TCGA-K4-A6MB-01A-11R-A31N-07	TCGA-K4-A6MB-01A	TP	Primary solid Tumor	A31N	1	1	1	0	1	Yes
267	BLCA	Kidney_urinary_bladder	TCGA-CF-A47X	TCGA-CF-A47X-01A-31R-A23W-07	TCGA-CF-A47X-01A	TP	Primary solid Tumor	A23W	1	1	1	0	1	Yes
268	BLCA	Kidney_urinary_bladder	TCGA-GD-A3OQ	TCGA-GD-A3OQ-01A-32R-A220-07	TCGA-GD-A3OQ-01A	TP	Primary solid Tumor	A220	1	1	1	0	1	Yes
269	BLCA	Kidney_urinary_bladder	TCGA-GD-A3OS	TCGA-GD-A3OS-01A-12R-A220-07	TCGA-GD-A3OS-01A	TP	Primary solid Tumor	A220	1	1	1	0	1	Yes
270	BLCA	Kidney_urinary_bladder	TCGA-CF-A5UA	TCGA-CF-A5UA-01A-11R-A28M-07	TCGA-CF-A5UA-01A	TP	Primary solid Tumor	A28M	1	1	1	0	1	Yes
271	BLCA	Kidney_urinary_bladder	TCGA-CF-A7I0	TCGA-CF-A7I0-01A-22R-A352-07	TCGA-CF-A7I0-01A	TP	Primary solid Tumor	A352	1	1	1	0	1	Yes
272	BLCA	Kidney_urinary_bladder	TCGA-GD-A76B	TCGA-GD-A76B-01A-11R-A32O-07	TCGA-GD-A76B-01A	TP	Primary solid Tumor	A32O	1	1	1	0	1	Yes
273	BLCA	Kidney_urinary_bladder	TCGA-CF-A8HY	TCGA-CF-A8HY-01A-11R-A36F-07	TCGA-CF-A8HY-01A	TP	Primary solid Tumor	A36F	1	1	1	0	1	Yes
274	BLCA	Kidney_urinary_bladder	TCGA-CF-A9FF	TCGA-CF-A9FF-01A-11R-A38B-07	TCGA-CF-A9FF-01A	TP	Primary solid Tumor	A38B	1	1	1	0	1	Yes
275	BLCA	Kidney_urinary_bladder	TCGA-BT-A20N	TCGA-BT-A20N-01A-11R-A14Y-07	TCGA-BT-A20N-01A	TP	Primary solid Tumor	A14Y	1	1	1	0	1	Yes
276	BLCA	Kidney_urinary_bladder	TCGA-BT-A20N	TCGA-BT-A20N-11A-11R-A14Y-07	TCGA-BT-A20N-11A	NT	Solid Tissue Normal	A14Y	1	1	1	0	1	Yes
277	BLCA	Kidney_urinary_bladder	TCGA-CF-A9FM	TCGA-CF-A9FM-01A-11R-A38B-07	TCGA-CF-A9FM-01A	TP	Primary solid Tumor	A38B	1	1	1	0	1	Yes
278	BLCA	Kidney_urinary_bladder	TCGA-XF-A8HF	TCGA-XF-A8HF-01A-11R-A36F-07	TCGA-XF-A8HF-01A	TP	Primary solid Tumor	A36F	1	1	1	0	1	Yes
279	BLCA	Kidney_urinary_bladder	TCGA-GU-A762	TCGA-GU-A762-01A-11R-A33J-07	TCGA-GU-A762-01A	TP	Primary solid Tumor	A33J	1	1	1	0	1	Yes
280	BLCA	Kidney_urinary_bladder	TCGA-UY-A8OB	TCGA-UY-A8OB-01A-12R-A42T-07	TCGA-UY-A8OB-01A	TP	Primary solid Tumor	A42T	1	1	1	0	1	Yes
281	BLCA	Kidney_urinary_bladder	TCGA-E7-A5KF	TCGA-E7-A5KF-01A-11R-A28M-07	TCGA-E7-A5KF-01A	TP	Primary solid Tumor	A28M	1	1	1	0	1	Yes
282	BLCA	Kidney_urinary_bladder	TCGA-GV-A3JV	TCGA-GV-A3JV-01A-11R-A220-07	TCGA-GV-A3JV-01A	TP	Primary solid Tumor	A220	1	1	1	0	1	Yes
283	BLCA	Kidney_urinary_bladder	TCGA-BL-A5ZZ	TCGA-BL-A5ZZ-01A-31R-A30C-07	TCGA-BL-A5ZZ-01A	TP	Primary solid Tumor	A30C	1	1	1	0	1	Yes
284	BLCA	Kidney_urinary_bladder	TCGA-GV-A3JX	TCGA-GV-A3JX-01A-11R-A20F-07	TCGA-GV-A3JX-01A	TP	Primary solid Tumor	A20F	1	1	1	0	1	Yes
285	BLCA	Kidney_urinary_bladder	TCGA-DK-A6B1	TCGA-DK-A6B1-01A-12R-A30C-07	TCGA-DK-A6B1-01A	TP	Primary solid Tumor	A30C	1	1	1	0	1	Yes
286	BLCA	Kidney_urinary_bladder	TCGA-UY-A9PE	TCGA-UY-A9PE-01A-11R-A38B-07	TCGA-UY-A9PE-01A	TP	Primary solid Tumor	A38B	1	1	1	0	1	Yes
287	BLCA	Kidney_urinary_bladder	TCGA-E7-A7DU	TCGA-E7-A7DU-01A-11R-A32O-07	TCGA-E7-A7DU-01A	TP	Primary solid Tumor	A32O	1	1	1	0	1	Yes
288	BLCA	Kidney_urinary_bladder	TCGA-UY-A9PH	TCGA-UY-A9PH-01A-11R-A38B-07	TCGA-UY-A9PH-01A	TP	Primary solid Tumor	A38B	1	1	1	0	1	Yes
289	BLCA	Kidney_urinary_bladder	TCGA-GC-A3I6	TCGA-GC-A3I6-01A-11R-A20F-07	TCGA-GC-A3I6-01A	TP	Primary solid Tumor	A20F	1	1	1	0	1	Yes
290	BLCA	Kidney_urinary_bladder	TCGA-GV-A3QI	TCGA-GV-A3QI-01A-11R-A220-07	TCGA-GV-A3QI-01A	TP	Primary solid Tumor	A220	1	1	1	0	1	Yes
291	BLCA	Kidney_urinary_bladder	TCGA-G2-AA3B	TCGA-G2-AA3B-01A-11R-A39I-07	TCGA-G2-AA3B-01A	TP	Primary solid Tumor	A39I	1	1	1	0	1	Yes
292	BLCA	Kidney_urinary_bladder	TCGA-E7-A7PW	TCGA-E7-A7PW-01A-11R-A352-07	TCGA-E7-A7PW-01A	TP	Primary solid Tumor	A352	1	1	1	0	1	Yes
293	BLCA	Kidney_urinary_bladder	TCGA-R3-A69X	TCGA-R3-A69X-01A-22R-A30C-07	TCGA-R3-A69X-01A	TP	Primary solid Tumor	A30C	1	1	1	0	1	Yes
294	BLCA	Kidney_urinary_bladder	TCGA-XF-A9T0	TCGA-XF-A9T0-01A-11R-A39I-07	TCGA-XF-A9T0-01A	TP	Primary solid Tumor	A39I	1	1	1	0	1	Yes
295	BLCA	Kidney_urinary_bladder	TCGA-XF-A9T2	TCGA-XF-A9T2-01A-11R-A42T-07	TCGA-XF-A9T2-01A	TP	Primary solid Tumor	A42T	1	1	1	0	1	Yes
296	BLCA	Kidney_urinary_bladder	TCGA-4Z-AA7M	TCGA-4Z-AA7M-01A-11R-A39I-07	TCGA-4Z-AA7M-01A	TP	Primary solid Tumor	A39I	1	1	1	0	1	Yes
297	BLCA	Kidney_urinary_bladder	TCGA-K4-A3WU	TCGA-K4-A3WU-01B-11R-A23N-07	TCGA-K4-A3WU-01B	TP	Primary solid Tumor	A23N	1	1	1	0	1	Yes
298	BLCA	Kidney_urinary_bladder	TCGA-4Z-AA7O	TCGA-4Z-AA7O-01A-31R-A39I-07	TCGA-4Z-AA7O-01A	TP	Primary solid Tumor	A39I	1	1	1	0	1	Yes
299	BLCA	Kidney_urinary_bladder	TCGA-XF-A9T5	TCGA-XF-A9T5-01A-11R-A42T-07	TCGA-XF-A9T5-01A	TP	Primary solid Tumor	A42T	1	1	1	0	1	Yes
300	BLCA	Kidney_urinary_bladder	TCGA-XF-A9T6	TCGA-XF-A9T6-01A-11R-A42T-07	TCGA-XF-A9T6-01A	TP	Primary solid Tumor	A42T	1	1	1	0	1	Yes
301	BLCA	Kidney_urinary_bladder	TCGA-BT-A42E	TCGA-BT-A42E-01A-11R-A23W-07	TCGA-BT-A42E-01A	TP	Primary solid Tumor	A23W	1	1	1	0	1	Yes
302	BLCA	Kidney_urinary_bladder	TCGA-DK-AA6S	TCGA-DK-AA6S-01A-21R-A39I-07	TCGA-DK-AA6S-01A	TP	Primary solid Tumor	A39I	1	1	1	0	1	Yes
303	BLCA	Kidney_urinary_bladder	TCGA-K4-A54R	TCGA-K4-A54R-11A-11R-A26T-07	TCGA-K4-A54R-11A	NT	Solid Tissue Normal	A26T	1	1	1	0	1	Yes
304	BLCA	Kidney_urinary_bladder	TCGA-GC-A6I3	TCGA-GC-A6I3-01A-11R-A31N-07	TCGA-GC-A6I3-01A	TP	Primary solid Tumor	A31N	1	1	1	0	1	Yes
305	BLCA	Kidney_urinary_bladder	TCGA-GD-A3OP	TCGA-GD-A3OP-11A-11R-A220-07	TCGA-GD-A3OP-11A	NT	Solid Tissue Normal	A220	1	1	1	0	1	Yes
306	BLCA	Kidney_urinary_bladder	TCGA-ZF-AA4X	TCGA-ZF-AA4X-01A-11R-A38B-07	TCGA-ZF-AA4X-01A	TP	Primary solid Tumor	A38B	1	1	1	0	1	Yes
307	BLCA	Kidney_urinary_bladder	TCGA-C4-A0F1	TCGA-C4-A0F1-01A-11R-A034-07	TCGA-C4-A0F1-01A	TP	Primary solid Tumor	A034	1	1	1	0	1	Yes
308	BLCA	Kidney_urinary_bladder	TCGA-C4-A0F6	TCGA-C4-A0F6-01A-11R-A10U-07	TCGA-C4-A0F6-01A	TP	Primary solid Tumor	A10U	1	1	1	0	1	Yes
309	BLCA	Kidney_urinary_bladder	TCGA-4Z-AA87	TCGA-4Z-AA87-01A-11R-A39I-07	TCGA-4Z-AA87-01A	TP	Primary solid Tumor	A39I	1	1	1	0	1	Yes
310	BLCA	Kidney_urinary_bladder	TCGA-XF-AAMY	TCGA-XF-AAMY-01A-11R-A42T-07	TCGA-XF-AAMY-01A	TP	Primary solid Tumor	A42T	1	1	1	0	1	Yes
311	BLCA	Kidney_urinary_bladder	TCGA-ZF-AA58	TCGA-ZF-AA58-01A-12R-A42T-07	TCGA-ZF-AA58-01A	TP	Primary solid Tumor	A42T	1	1	1	0	1	Yes
312	BLCA	Kidney_urinary_bladder	TCGA-XF-AAN0	TCGA-XF-AAN0-01A-11R-A42T-07	TCGA-XF-AAN0-01A	TP	Primary solid Tumor	A42T	1	1	1	0	1	Yes
313	BLCA	Kidney_urinary_bladder	TCGA-KQ-A41Q	TCGA-KQ-A41Q-01A-11R-A33J-07	TCGA-KQ-A41Q-01A	TP	Primary solid Tumor	A33J	1	1	1	0	1	Yes
314	BLCA	Kidney_urinary_bladder	TCGA-FD-A3B5	TCGA-FD-A3B5-01A-11R-A20F-07	TCGA-FD-A3B5-01A	TP	Primary solid Tumor	A20F	1	1	1	0	1	Yes
315	BLCA	Kidney_urinary_bladder	TCGA-ZF-AA5P	TCGA-ZF-AA5P-01A-11R-A39I-07	TCGA-ZF-AA5P-01A	TP	Primary solid Tumor	A39I	1	1	1	0	1	Yes
316	BLCA	Kidney_urinary_bladder	TCGA-FD-A6TG	TCGA-FD-A6TG-01A-11R-A32O-07	TCGA-FD-A6TG-01A	TP	Primary solid Tumor	A32O	1	1	1	0	1	Yes
317	BLCA	Kidney_urinary_bladder	TCGA-FD-A6TH	TCGA-FD-A6TH-01A-11R-A32O-07	TCGA-FD-A6TH-01A	TP	Primary solid Tumor	A32O	1	1	1	0	1	Yes
318	BLCA	Kidney_urinary_bladder	TCGA-FD-A6TI	TCGA-FD-A6TI-01A-11R-A32O-07	TCGA-FD-A6TI-01A	TP	Primary solid Tumor	A32O	1	1	1	0	1	Yes
319	BLCA	Kidney_urinary_bladder	TCGA-CU-A3KJ	TCGA-CU-A3KJ-01A-11R-A21D-07	TCGA-CU-A3KJ-01A	TP	Primary solid Tumor	A21D	1	1	1	0	1	Yes
320	BLCA	Kidney_urinary_bladder	TCGA-UY-A78O	TCGA-UY-A78O-01A-12R-A33J-07	TCGA-UY-A78O-01A	TP	Primary solid Tumor	A33J	1	1	1	0	1	Yes
321	BLCA	Kidney_urinary_bladder	TCGA-DK-A3IU	TCGA-DK-A3IU-01A-11R-A20F-07	TCGA-DK-A3IU-01A	TP	Primary solid Tumor	A20F	1	1	1	0	1	Yes
322	BLCA	Kidney_urinary_bladder	TCGA-BL-A13J	TCGA-BL-A13J-01A-11R-A277-07	TCGA-BL-A13J-01A	TP	Primary solid Tumor	A277	0	1	0	0	1	No
323	BLCA	Kidney_urinary_bladder	TCGA-UY-A9PA	TCGA-UY-A9PA-01A-11R-A38B-07	TCGA-UY-A9PA-01A	TP	Primary solid Tumor	A38B	1	1	1	0	1	Yes
324	BLCA	Kidney_urinary_bladder	TCGA-GV-A3JW	TCGA-GV-A3JW-01A-11R-A20F-07	TCGA-GV-A3JW-01A	TP	Primary solid Tumor	A20F	1	1	1	0	1	Yes
325	BLCA	Kidney_urinary_bladder	TCGA-E7-A6ME	TCGA-E7-A6ME-01A-22R-A32O-07	TCGA-E7-A6ME-01A	TP	Primary solid Tumor	A32O	1	1	1	0	1	Yes
326	BLCA	Kidney_urinary_bladder	TCGA-E7-A678	TCGA-E7-A678-01A-11R-A30C-07	TCGA-E7-A678-01A	TP	Primary solid Tumor	A30C	1	1	1	0	1	Yes
327	BLCA	Kidney_urinary_bladder	TCGA-UY-A9PF	TCGA-UY-A9PF-01A-11R-A38B-07	TCGA-UY-A9PF-01A	TP	Primary solid Tumor	A38B	1	1	1	0	1	Yes
328	BLCA	Kidney_urinary_bladder	TCGA-XF-A9SY	TCGA-XF-A9SY-01A-21R-A42T-07	TCGA-XF-A9SY-01A	TP	Primary solid Tumor	A42T	1	1	1	0	1	Yes
329	BLCA	Kidney_urinary_bladder	TCGA-XF-A9SZ	TCGA-XF-A9SZ-01A-11R-A39I-07	TCGA-XF-A9SZ-01A	TP	Primary solid Tumor	A39I	1	1	1	0	1	Yes
330	BLCA	Kidney_urinary_bladder	TCGA-GC-A3OO	TCGA-GC-A3OO-01A-11R-A22U-07	TCGA-GC-A3OO-01A	TP	Primary solid Tumor	A22U	1	1	1	0	1	Yes
331	BLCA	Kidney_urinary_bladder	TCGA-DK-AA6M	TCGA-DK-AA6M-01A-11R-A39I-07	TCGA-DK-AA6M-01A	TP	Primary solid Tumor	A39I	1	1	1	0	1	Yes
332	BLCA	Kidney_urinary_bladder	TCGA-G2-A2ES	TCGA-G2-A2ES-01A-11R-A180-07	TCGA-G2-A2ES-01A	TP	Primary solid Tumor	A180	1	1	1	0	1	Yes
333	BLCA	Kidney_urinary_bladder	TCGA-G2-A2EO	TCGA-G2-A2EO-01A-11R-A180-07	TCGA-G2-A2EO-01A	TP	Primary solid Tumor	A180	1	1	1	0	1	Yes
334	BLCA	Kidney_urinary_bladder	TCGA-BT-A2LA	TCGA-BT-A2LA-11A-11R-A18C-07	TCGA-BT-A2LA-11A	NT	Solid Tissue Normal	A18C	1	1	1	0	1	Yes
335	BLCA	Kidney_urinary_bladder	TCGA-ZF-A9R7	TCGA-ZF-A9R7-01A-11R-A38B-07	TCGA-ZF-A9R7-01A	TP	Primary solid Tumor	A38B	1	1	1	0	1	Yes
336	BLCA	Kidney_urinary_bladder	TCGA-LT-A5Z6	TCGA-LT-A5Z6-01A-11R-A28M-07	TCGA-LT-A5Z6-01A	TP	Primary solid Tumor	A28M	1	1	1	0	1	Yes
337	BLCA	Kidney_urinary_bladder	TCGA-FD-A5BS	TCGA-FD-A5BS-01A-21R-A26T-07	TCGA-FD-A5BS-01A	TP	Primary solid Tumor	A26T	1	1	1	0	1	Yes
338	BLCA	Kidney_urinary_bladder	TCGA-CF-A1HS	TCGA-CF-A1HS-01A-11R-A13Y-07	TCGA-CF-A1HS-01A	TP	Primary solid Tumor	A13Y	1	1	1	0	1	Yes
339	BLCA	Kidney_urinary_bladder	TCGA-GC-A3RD	TCGA-GC-A3RD-01A-12R-A22U-07	TCGA-GC-A3RD-01A	TP	Primary solid Tumor	A22U	1	1	1	0	1	Yes
340	BLCA	Kidney_urinary_bladder	TCGA-K4-A3WV	TCGA-K4-A3WV-11A-21R-A22U-07	TCGA-K4-A3WV-11A	NT	Solid Tissue Normal	A22U	1	1	1	0	1	Yes
341	BLCA	Kidney_urinary_bladder	TCGA-DK-AA6R	TCGA-DK-AA6R-01A-11R-A42T-07	TCGA-DK-AA6R-01A	TP	Primary solid Tumor	A42T	1	1	1	0	1	Yes
342	BLCA	Kidney_urinary_bladder	TCGA-FD-A5BV	TCGA-FD-A5BV-01A-11R-A26T-07	TCGA-FD-A5BV-01A	TP	Primary solid Tumor	A26T	1	1	1	0	1	Yes
343	BLCA	Kidney_urinary_bladder	TCGA-ZF-A9RM	TCGA-ZF-A9RM-01A-11R-A38B-07	TCGA-ZF-A9RM-01A	TP	Primary solid Tumor	A38B	1	1	1	0	1	Yes
344	BLCA	Kidney_urinary_bladder	TCGA-K4-A4AC	TCGA-K4-A4AC-01A-21R-A26T-07	TCGA-K4-A4AC-01A	TP	Primary solid Tumor	A26T	1	1	1	0	1	Yes
345	BLCA	Kidney_urinary_bladder	TCGA-ZF-AA4T	TCGA-ZF-AA4T-01A-11R-A38B-07	TCGA-ZF-AA4T-01A	TP	Primary solid Tumor	A38B	1	1	1	0	1	Yes
346	BLCA	Kidney_urinary_bladder	TCGA-DK-AA71	TCGA-DK-AA71-01A-31R-A39I-07	TCGA-DK-AA71-01A	TP	Primary solid Tumor	A39I	1	1	1	0	1	Yes
347	BLCA	Kidney_urinary_bladder	TCGA-DK-AA74	TCGA-DK-AA74-01A-11R-A39I-07	TCGA-DK-AA74-01A	TP	Primary solid Tumor	A39I	1	1	1	0	1	Yes
348	BLCA	Kidney_urinary_bladder	TCGA-C4-A0F0	TCGA-C4-A0F0-01A-12R-A10U-07	TCGA-C4-A0F0-01A	TP	Primary solid Tumor	A10U	1	1	1	0	1	Yes
349	BLCA	Kidney_urinary_bladder	TCGA-DK-AA76	TCGA-DK-AA76-01A-11R-A39I-07	TCGA-DK-AA76-01A	TP	Primary solid Tumor	A39I	1	1	1	0	1	Yes
350	BLCA	Kidney_urinary_bladder	TCGA-CF-A47Y	TCGA-CF-A47Y-01A-11R-A23W-07	TCGA-CF-A47Y-01A	TP	Primary solid Tumor	A23W	1	1	1	0	1	Yes
351	BLCA	Kidney_urinary_bladder	TCGA-GD-A6C6	TCGA-GD-A6C6-01A-21R-A31N-07	TCGA-GD-A6C6-01A	TP	Primary solid Tumor	A31N	1	1	1	0	1	Yes
352	BLCA	Kidney_urinary_bladder	TCGA-FD-A6TB	TCGA-FD-A6TB-01A-12R-A33J-07	TCGA-FD-A6TB-01A	TP	Primary solid Tumor	A33J	1	1	1	0	1	Yes
353	BLCA	Kidney_urinary_bladder	TCGA-ZF-AA5H	TCGA-ZF-AA5H-01A-11R-A39I-07	TCGA-ZF-AA5H-01A	TP	Primary solid Tumor	A39I	1	1	1	0	1	Yes
354	BLCA	Kidney_urinary_bladder	TCGA-XF-AAN1	TCGA-XF-AAN1-01A-31R-A42T-07	TCGA-XF-AAN1-01A	TP	Primary solid Tumor	A42T	1	1	1	0	1	Yes
355	BLCA	Kidney_urinary_bladder	TCGA-DK-A3IK	TCGA-DK-A3IK-01A-32R-A21D-07	TCGA-DK-A3IK-01A	TP	Primary solid Tumor	A21D	1	1	1	0	1	Yes
356	BLCA	Kidney_urinary_bladder	TCGA-CU-A0YN	TCGA-CU-A0YN-11A-11R-A10U-07	TCGA-CU-A0YN-11A	NT	Solid Tissue Normal	A10U	1	1	1	0	1	Yes
357	BLCA	Kidney_urinary_bladder	TCGA-DK-A3IM	TCGA-DK-A3IM-01A-11R-A20F-07	TCGA-DK-A3IM-01A	TP	Primary solid Tumor	A20F	1	1	1	0	1	Yes
358	BLCA	Kidney_urinary_bladder	TCGA-DK-A3IN	TCGA-DK-A3IN-01A-11R-A20F-07	TCGA-DK-A3IN-01A	TP	Primary solid Tumor	A20F	1	1	1	0	1	Yes
359	BLCA	Kidney_urinary_bladder	TCGA-UY-A78N	TCGA-UY-A78N-01A-12R-A33J-07	TCGA-UY-A78N-01A	TP	Primary solid Tumor	A33J	1	1	1	0	1	Yes
360	BLCA	Kidney_urinary_bladder	TCGA-XF-AAN7	TCGA-XF-AAN7-01A-11R-A42T-07	TCGA-XF-AAN7-01A	TP	Primary solid Tumor	A42T	1	1	1	0	1	Yes
361	BLCA	Kidney_urinary_bladder	TCGA-BL-A0C8	TCGA-BL-A0C8-01A-11R-A277-07	TCGA-BL-A0C8-01A	TP	Primary solid Tumor	A277	0	1	0	0	1	No
362	BLCA	Kidney_urinary_bladder	TCGA-E7-A677	TCGA-E7-A677-01A-11R-A30C-07	TCGA-E7-A677-01A	TP	Primary solid Tumor	A30C	1	1	1	0	1	Yes
363	BLCA	Kidney_urinary_bladder	TCGA-BL-A13J	TCGA-BL-A13J-01A-11R-A10U-07	TCGA-BL-A13J-01A	TP	Primary solid Tumor	A10U	1	1	1	0	1	Yes
364	BLCA	Kidney_urinary_bladder	TCGA-BL-A3JM	TCGA-BL-A3JM-01A-12R-A21D-07	TCGA-BL-A3JM-01A	TP	Primary solid Tumor	A21D	1	1	1	0	1	Yes
365	BLCA	Kidney_urinary_bladder	TCGA-UY-A9PD	TCGA-UY-A9PD-01A-11R-A38B-07	TCGA-UY-A9PD-01A	TP	Primary solid Tumor	A38B	1	1	1	0	1	Yes
366	BLCA	Kidney_urinary_bladder	TCGA-XF-A9SP	TCGA-XF-A9SP-01A-11R-A39I-07	TCGA-XF-A9SP-01A	TP	Primary solid Tumor	A39I	1	1	1	0	1	Yes
367	BLCA	Kidney_urinary_bladder	TCGA-E7-A6MD	TCGA-E7-A6MD-01A-41R-A352-07	TCGA-E7-A6MD-01A	TP	Primary solid Tumor	A352	1	1	1	0	1	Yes
368	BLCA	Kidney_urinary_bladder	TCGA-GC-A3BM	TCGA-GC-A3BM-11A-11R-A22U-07	TCGA-GC-A3BM-11A	NT	Solid Tissue Normal	A22U	1	1	1	0	1	Yes
369	BLCA	Kidney_urinary_bladder	TCGA-GC-A3BM	TCGA-GC-A3BM-01A-11R-A22U-07	TCGA-GC-A3BM-01A	TP	Primary solid Tumor	A22U	1	1	1	0	1	Yes
370	BLCA	Kidney_urinary_bladder	TCGA-BT-A2LD	TCGA-BT-A2LD-01A-12R-A20F-07	TCGA-BT-A2LD-01A	TP	Primary solid Tumor	A20F	1	1	1	0	1	Yes
371	BLCA	Kidney_urinary_bladder	TCGA-DK-AA6L	TCGA-DK-AA6L-01A-11R-A39I-07	TCGA-DK-AA6L-01A	TP	Primary solid Tumor	A39I	1	1	1	0	1	Yes
372	BLCA	Kidney_urinary_bladder	TCGA-FJ-A871	TCGA-FJ-A871-01A-11R-A352-07	TCGA-FJ-A871-01A	TP	Primary solid Tumor	A352	1	1	1	0	1	Yes
373	BLCA	Kidney_urinary_bladder	TCGA-FD-A43U	TCGA-FD-A43U-01A-11R-A23W-07	TCGA-FD-A43U-01A	TP	Primary solid Tumor	A23W	1	1	1	0	1	Yes
374	BLCA	Kidney_urinary_bladder	TCGA-FJ-A3ZF	TCGA-FJ-A3ZF-01A-11R-A23N-07	TCGA-FJ-A3ZF-01A	TP	Primary solid Tumor	A23N	1	1	1	0	1	Yes
375	BLCA	Kidney_urinary_bladder	TCGA-ZF-A9R5	TCGA-ZF-A9R5-01A-12R-A42T-07	TCGA-ZF-A9R5-01A	TP	Primary solid Tumor	A42T	1	1	1	0	1	Yes
376	BLCA	Kidney_urinary_bladder	TCGA-FD-A5BR	TCGA-FD-A5BR-01A-11R-A26T-07	TCGA-FD-A5BR-01A	TP	Primary solid Tumor	A26T	1	1	1	0	1	Yes
377	BLCA	Kidney_urinary_bladder	TCGA-FD-A43Y	TCGA-FD-A43Y-01A-21R-A26T-07	TCGA-FD-A43Y-01A	TP	Primary solid Tumor	A26T	1	1	1	0	1	Yes
378	BLCA	Kidney_urinary_bladder	TCGA-4Z-AA7N	TCGA-4Z-AA7N-01A-11R-A39I-07	TCGA-4Z-AA7N-01A	TP	Primary solid Tumor	A39I	1	1	1	0	1	Yes
379	BLCA	Kidney_urinary_bladder	TCGA-BT-A3PK	TCGA-BT-A3PK-01A-21R-A220-07	TCGA-BT-A3PK-01A	TP	Primary solid Tumor	A220	1	1	1	0	1	Yes
380	BLCA	Kidney_urinary_bladder	TCGA-HQ-A2OE	TCGA-HQ-A2OE-01A-11R-A206-07	TCGA-HQ-A2OE-01A	TP	Primary solid Tumor	A206	1	1	1	0	1	Yes
381	BLCA	Kidney_urinary_bladder	TCGA-HQ-A2OF	TCGA-HQ-A2OF-01A-11R-A26T-07	TCGA-HQ-A2OF-01A	TP	Primary solid Tumor	A26T	1	1	1	0	1	Yes
382	BLCA	Kidney_urinary_bladder	TCGA-K4-A4AB	TCGA-K4-A4AB-01B-12R-A28M-07	TCGA-K4-A4AB-01B	TP	Primary solid Tumor	A28M	1	1	1	0	1	Yes
383	BLCA	Kidney_urinary_bladder	TCGA-E7-A97P	TCGA-E7-A97P-01A-11R-A38B-07	TCGA-E7-A97P-01A	TP	Primary solid Tumor	A38B	1	1	1	0	1	Yes
384	BLCA	Kidney_urinary_bladder	TCGA-GC-A3WC	TCGA-GC-A3WC-11A-11R-A22U-07	TCGA-GC-A3WC-11A	NT	Solid Tissue Normal	A22U	1	1	1	0	1	Yes
385	BLCA	Kidney_urinary_bladder	TCGA-GC-A4ZW	TCGA-GC-A4ZW-01A-11R-A26T-07	TCGA-GC-A4ZW-01A	TP	Primary solid Tumor	A26T	1	1	1	0	1	Yes
386	BLCA	Kidney_urinary_bladder	TCGA-DK-AA6X	TCGA-DK-AA6X-01A-12R-A42T-07	TCGA-DK-AA6X-01A	TP	Primary solid Tumor	A42T	1	1	1	0	1	Yes
387	BLCA	Kidney_urinary_bladder	TCGA-XF-AAMQ	TCGA-XF-AAMQ-01A-11R-A42T-07	TCGA-XF-AAMQ-01A	TP	Primary solid Tumor	A42T	1	1	1	0	1	Yes
388	BLCA	Kidney_urinary_bladder	TCGA-C4-A0EZ	TCGA-C4-A0EZ-01A-21R-A24X-07	TCGA-C4-A0EZ-01A	TP	Primary solid Tumor	A24X	1	1	1	0	1	Yes
389	BLCA	Kidney_urinary_bladder	TCGA-ZF-AA51	TCGA-ZF-AA51-01A-21R-A39I-07	TCGA-ZF-AA51-01A	TP	Primary solid Tumor	A39I	1	1	1	0	1	Yes
390	BLCA	Kidney_urinary_bladder	TCGA-C4-A0F7	TCGA-C4-A0F7-01A-11R-A084-07	TCGA-C4-A0F7-01A	TP	Primary solid Tumor	A084	1	1	1	0	1	Yes
391	BLCA	Kidney_urinary_bladder	TCGA-ZF-AA56	TCGA-ZF-AA56-01A-31R-A39I-07	TCGA-ZF-AA56-01A	TP	Primary solid Tumor	A39I	1	1	1	0	1	Yes
392	BLCA	Kidney_urinary_bladder	TCGA-DK-A3WY	TCGA-DK-A3WY-01A-11R-A22U-07	TCGA-DK-A3WY-01A	TP	Primary solid Tumor	A22U	1	1	1	0	1	Yes
393	BLCA	Kidney_urinary_bladder	TCGA-2F-A9KP	TCGA-2F-A9KP-01A-11R-A38B-07	TCGA-2F-A9KP-01A	TP	Primary solid Tumor	A38B	1	1	1	0	1	Yes
394	BLCA	Kidney_urinary_bladder	TCGA-ZF-AA54	TCGA-ZF-AA54-01A-11R-A39I-07	TCGA-ZF-AA54-01A	TP	Primary solid Tumor	A39I	1	1	1	0	1	Yes
395	BLCA	Kidney_urinary_bladder	TCGA-BT-A20J	TCGA-BT-A20J-01A-11R-A14Y-07	TCGA-BT-A20J-01A	TP	Primary solid Tumor	A14Y	1	1	1	0	1	Yes
396	BLCA	Kidney_urinary_bladder	TCGA-XF-A9SX	TCGA-XF-A9SX-01A-21R-A39I-07	TCGA-XF-A9SX-01A	TP	Primary solid Tumor	A39I	1	1	1	0	1	Yes
397	BLCA	Kidney_urinary_bladder	TCGA-CF-A9FH	TCGA-CF-A9FH-01A-11R-A38B-07	TCGA-CF-A9FH-01A	TP	Primary solid Tumor	A38B	1	1	1	0	1	Yes
398	BLCA	Kidney_urinary_bladder	TCGA-BT-A20O	TCGA-BT-A20O-01A-21R-A14Y-07	TCGA-BT-A20O-01A	TP	Primary solid Tumor	A14Y	1	1	1	0	1	Yes
399	BLCA	Kidney_urinary_bladder	TCGA-FD-A3B8	TCGA-FD-A3B8-01A-31R-A20F-07	TCGA-FD-A3B8-01A	TP	Primary solid Tumor	A20F	1	1	1	0	1	Yes
400	BLCA	Kidney_urinary_bladder	TCGA-E7-A519	TCGA-E7-A519-01A-11R-A26T-07	TCGA-E7-A519-01A	TP	Primary solid Tumor	A26T	1	1	1	0	1	Yes
401	BLCA	Kidney_urinary_bladder	TCGA-CU-A3QU	TCGA-CU-A3QU-01A-11R-A22U-07	TCGA-CU-A3QU-01A	TP	Primary solid Tumor	A22U	1	1	1	0	1	Yes
402	BLCA	Kidney_urinary_bladder	TCGA-UY-A8OC	TCGA-UY-A8OC-01A-11R-A36F-07	TCGA-UY-A8OC-01A	TP	Primary solid Tumor	A36F	1	1	1	0	1	Yes
403	BLCA	Kidney_urinary_bladder	TCGA-UY-A8OD	TCGA-UY-A8OD-01A-11R-A36F-07	TCGA-UY-A8OD-01A	TP	Primary solid Tumor	A36F	1	1	1	0	1	Yes
404	BLCA	Kidney_urinary_bladder	TCGA-DK-A3WX	TCGA-DK-A3WX-01A-22R-A22U-07	TCGA-DK-A3WX-01A	TP	Primary solid Tumor	A22U	1	1	1	0	1	Yes
405	BLCA	Kidney_urinary_bladder	TCGA-GC-A3RC	TCGA-GC-A3RC-01A-11R-A22U-07	TCGA-GC-A3RC-01A	TP	Primary solid Tumor	A22U	1	1	1	0	1	Yes
406	BLCA	Kidney_urinary_bladder	TCGA-E7-A85H	TCGA-E7-A85H-01A-11R-A352-07	TCGA-E7-A85H-01A	TP	Primary solid Tumor	A352	1	1	1	0	1	Yes
407	BLCA	Kidney_urinary_bladder	TCGA-UY-A9PB	TCGA-UY-A9PB-01A-11R-A38B-07	TCGA-UY-A9PB-01A	TP	Primary solid Tumor	A38B	1	1	1	0	1	Yes
408	BLCA	Kidney_urinary_bladder	TCGA-DK-A3X2	TCGA-DK-A3X2-01A-11R-A22U-07	TCGA-DK-A3X2-01A	TP	Primary solid Tumor	A22U	1	1	1	0	1	Yes
409	BLCA	Kidney_urinary_bladder	TCGA-PQ-A6FI	TCGA-PQ-A6FI-01A-11R-A31N-07	TCGA-PQ-A6FI-01A	TP	Primary solid Tumor	A31N	1	1	1	0	1	Yes
410	BLCA	Kidney_urinary_bladder	TCGA-DK-A6AW	TCGA-DK-A6AW-01A-11R-A30C-07	TCGA-DK-A6AW-01A	TP	Primary solid Tumor	A30C	1	1	1	0	1	Yes
411	BLCA	Kidney_urinary_bladder	TCGA-BT-A2LB	TCGA-BT-A2LB-01A-11R-A18C-07	TCGA-BT-A2LB-01A	TP	Primary solid Tumor	A18C	1	1	1	0	1	Yes
412	BLCA	Kidney_urinary_bladder	TCGA-BT-A2LB	TCGA-BT-A2LB-11A-11R-A18C-07	TCGA-BT-A2LB-11A	NT	Solid Tissue Normal	A18C	1	1	1	0	1	Yes
413	BLCA	Kidney_urinary_bladder	TCGA-FD-A43S	TCGA-FD-A43S-01A-21R-A23W-07	TCGA-FD-A43S-01A	TP	Primary solid Tumor	A23W	1	1	1	0	1	Yes
414	BLCA	Kidney_urinary_bladder	TCGA-G2-A2EK	TCGA-G2-A2EK-01A-22R-A18C-07	TCGA-G2-A2EK-01A	TP	Primary solid Tumor	A18C	1	1	1	0	1	Yes
415	BLCA	Kidney_urinary_bladder	TCGA-FD-A43N	TCGA-FD-A43N-01A-11R-A23W-07	TCGA-FD-A43N-01A	TP	Primary solid Tumor	A23W	1	1	1	0	1	Yes
416	BLCA	Kidney_urinary_bladder	TCGA-BT-A3PH	TCGA-BT-A3PH-01A-11R-A220-07	TCGA-BT-A3PH-01A	TP	Primary solid Tumor	A220	1	1	1	0	1	Yes
417	BLCA	Kidney_urinary_bladder	TCGA-FD-A43X	TCGA-FD-A43X-01A-11R-A23W-07	TCGA-FD-A43X-01A	TP	Primary solid Tumor	A23W	1	1	1	0	1	Yes
418	BLCA	Kidney_urinary_bladder	TCGA-FD-A3SQ	TCGA-FD-A3SQ-01A-21R-A22U-07	TCGA-FD-A3SQ-01A	TP	Primary solid Tumor	A22U	1	1	1	0	1	Yes
419	BLCA	Kidney_urinary_bladder	TCGA-BL-A13J	TCGA-BL-A13J-01B-04R-A277-07	TCGA-BL-A13J-01B	TP	Primary solid Tumor	A277	0	1	0	0	1	No
420	BLCA	Kidney_urinary_bladder	TCGA-ZF-A9RL	TCGA-ZF-A9RL-01A-11R-A38B-07	TCGA-ZF-A9RL-01A	TP	Primary solid Tumor	A38B	1	1	1	0	1	Yes
421	BLCA	Kidney_urinary_bladder	TCGA-E7-A8O7	TCGA-E7-A8O7-01A-11R-A36F-07	TCGA-E7-A8O7-01A	TP	Primary solid Tumor	A36F	1	1	1	0	1	Yes
422	BLCA	Kidney_urinary_bladder	TCGA-CU-A0YN	TCGA-CU-A0YN-01A-21R-A10U-07	TCGA-CU-A0YN-01A	TP	Primary solid Tumor	A10U	1	1	1	0	1	Yes
423	BLCA	Kidney_urinary_bladder	TCGA-PQ-A6FN	TCGA-PQ-A6FN-01A-11R-A31N-07	TCGA-PQ-A6FN-01A	TP	Primary solid Tumor	A31N	1	1	1	0	1	Yes
424	BLCA	Kidney_urinary_bladder	TCGA-FD-A5BU	TCGA-FD-A5BU-01A-31R-A26T-07	TCGA-FD-A5BU-01A	TP	Primary solid Tumor	A26T	1	1	1	0	1	Yes
425	BLCA	Kidney_urinary_bladder	TCGA-GC-A6I1	TCGA-GC-A6I1-01A-12R-A31N-07	TCGA-GC-A6I1-01A	TP	Primary solid Tumor	A31N	1	1	1	0	1	Yes
426	BLCA	Kidney_urinary_bladder	TCGA-E7-A97Q	TCGA-E7-A97Q-01A-11R-A38B-07	TCGA-E7-A97Q-01A	TP	Primary solid Tumor	A38B	1	1	1	0	1	Yes
427	BLCA	Kidney_urinary_bladder	TCGA-GD-A2C5	TCGA-GD-A2C5-11A-11R-A180-07	TCGA-GD-A2C5-11A	NT	Solid Tissue Normal	A180	1	1	1	0	1	Yes
428	BLCA	Kidney_urinary_bladder	TCGA-DK-A3IS	TCGA-DK-A3IS-01A-21R-A21D-07	TCGA-DK-A3IS-01A	TP	Primary solid Tumor	A21D	1	1	1	0	1	Yes
429	BLCA	Kidney_urinary_bladder	TCGA-FD-A3SJ	TCGA-FD-A3SJ-01A-12R-A22U-07	TCGA-FD-A3SJ-01A	TP	Primary solid Tumor	A22U	1	1	1	0	1	Yes
430	BLCA	Kidney_urinary_bladder	TCGA-DK-AA75	TCGA-DK-AA75-01A-11R-A39I-07	TCGA-DK-AA75-01A	TP	Primary solid Tumor	A39I	1	1	1	0	1	Yes
431	BLCA	Kidney_urinary_bladder	TCGA-BL-A13I	TCGA-BL-A13I-01B-04R-A277-07	TCGA-BL-A13I-01B	TP	Primary solid Tumor	A277	0	1	0	0	1	No
432	BLCA	Kidney_urinary_bladder	TCGA-ZF-A9RD	TCGA-ZF-A9RD-01A-11R-A42T-07	TCGA-ZF-A9RD-01A	TP	Primary solid Tumor	A42T	1	1	1	0	1	Yes
433	BLCA	Kidney_urinary_bladder	TCGA-FD-A3SR	TCGA-FD-A3SR-01A-11R-A22U-07	TCGA-FD-A3SR-01A	TP	Primary solid Tumor	A22U	1	1	1	0	1	Yes
434	BLCA	Kidney_urinary_bladder	TCGA-XF-A9SM	TCGA-XF-A9SM-01A-11R-A42T-07	TCGA-XF-A9SM-01A	TP	Primary solid Tumor	A42T	1	1	1	0	1	Yes
435	BLCA	Kidney_urinary_bladder	TCGA-BT-A2LA	TCGA-BT-A2LA-01A-11R-A18C-07	TCGA-BT-A2LA-01A	TP	Primary solid Tumor	A18C	1	1	1	0	1	Yes
436	BLCA	Kidney_urinary_bladder	TCGA-DK-A6AV	TCGA-DK-A6AV-01A-12R-A30C-07	TCGA-DK-A6AV-01A	TP	Primary solid Tumor	A30C	1	1	1	0	1	Yes
437	BLCA	Kidney_urinary_bladder	TCGA-ZF-AA5N	TCGA-ZF-AA5N-01A-11R-A42T-07	TCGA-ZF-AA5N-01A	TP	Primary solid Tumor	A42T	1	1	1	0	1	Yes
438	BLCA	Kidney_urinary_bladder	TCGA-CU-A0YR	TCGA-CU-A0YR-01A-12R-A10U-07	TCGA-CU-A0YR-01A	TP	Primary solid Tumor	A10U	1	1	1	0	1	Yes
439	BLCA	Kidney_urinary_bladder	TCGA-CU-A0YR	TCGA-CU-A0YR-11A-13R-A10U-07	TCGA-CU-A0YR-11A	NT	Solid Tissue Normal	A10U	1	1	1	0	1	Yes
440	BLCA	Kidney_urinary_bladder	TCGA-DK-A3IQ	TCGA-DK-A3IQ-01A-31R-A32Y-07	TCGA-DK-A3IQ-01A	TP	Primary solid Tumor	A32Y	1	1	1	0	1	Yes
441	BLCA	Kidney_urinary_bladder	TCGA-ZF-A9R3	TCGA-ZF-A9R3-01A-11R-A38B-07	TCGA-ZF-A9R3-01A	TP	Primary solid Tumor	A38B	1	1	1	0	1	Yes
442	BLCA	Kidney_urinary_bladder	TCGA-2F-A9KQ	TCGA-2F-A9KQ-01A-11R-A38B-07	TCGA-2F-A9KQ-01A	TP	Primary solid Tumor	A38B	1	1	1	0	1	Yes
443	BLCA	Kidney_urinary_bladder	TCGA-DK-A3IV	TCGA-DK-A3IV-01A-22R-A21D-07	TCGA-DK-A3IV-01A	TP	Primary solid Tumor	A21D	1	1	1	0	1	Yes
444	BLCA	Kidney_urinary_bladder	TCGA-FJ-A3ZE	TCGA-FJ-A3ZE-01A-11R-A23N-07	TCGA-FJ-A3ZE-01A	TP	Primary solid Tumor	A23N	1	1	1	0	1	Yes
445	BLCA	Kidney_urinary_bladder	TCGA-DK-A3WW	TCGA-DK-A3WW-01A-22R-A23N-07	TCGA-DK-A3WW-01A	TP	Primary solid Tumor	A23N	1	1	1	0	1	Yes
446	BLCA	Kidney_urinary_bladder	TCGA-BT-A3PJ	TCGA-BT-A3PJ-01A-21R-A220-07	TCGA-BT-A3PJ-01A	TP	Primary solid Tumor	A220	1	1	1	0	1	Yes
447	BLCA	Kidney_urinary_bladder	TCGA-ZF-A9RF	TCGA-ZF-A9RF-01A-11R-A38B-07	TCGA-ZF-A9RF-01A	TP	Primary solid Tumor	A38B	1	1	1	0	1	Yes
448	BLCA	Kidney_urinary_bladder	TCGA-ZF-A9RE	TCGA-ZF-A9RE-01A-11R-A38B-07	TCGA-ZF-A9RE-01A	TP	Primary solid Tumor	A38B	1	1	1	0	1	Yes
449	BLCA	Kidney_urinary_bladder	TCGA-XF-A9SK	TCGA-XF-A9SK-01A-11R-A42T-07	TCGA-XF-A9SK-01A	TP	Primary solid Tumor	A42T	1	1	1	0	1	Yes
450	BLCA	Kidney_urinary_bladder	TCGA-XF-A9SU	TCGA-XF-A9SU-01A-31R-A39I-07	TCGA-XF-A9SU-01A	TP	Primary solid Tumor	A39I	1	1	1	0	1	Yes
451	BLCA	Kidney_urinary_bladder	TCGA-2F-A9KT	TCGA-2F-A9KT-01A-11R-A38B-07	TCGA-2F-A9KT-01A	TP	Primary solid Tumor	A38B	1	1	1	0	1	Yes
452	BLCA	Kidney_urinary_bladder	TCGA-G2-A2EL	TCGA-G2-A2EL-01A-12R-A18C-07	TCGA-G2-A2EL-01A	TP	Primary solid Tumor	A18C	1	1	1	0	1	Yes
453	BLCA	Kidney_urinary_bladder	TCGA-2F-A9KR	TCGA-2F-A9KR-01A-11R-A38B-07	TCGA-2F-A9KR-01A	TP	Primary solid Tumor	A38B	1	1	1	0	1	Yes
454	BLCA	Kidney_urinary_bladder	TCGA-FJ-A3Z9	TCGA-FJ-A3Z9-01A-11R-A26T-07	TCGA-FJ-A3Z9-01A	TP	Primary solid Tumor	A26T	1	1	1	0	1	Yes
455	BLCA	Kidney_urinary_bladder	TCGA-BT-A20P	TCGA-BT-A20P-01A-11R-A14Y-07	TCGA-BT-A20P-01A	TP	Primary solid Tumor	A14Y	1	1	1	0	1	Yes
456	BLCA	Kidney_urinary_bladder	TCGA-ZF-A9R4	TCGA-ZF-A9R4-01A-11R-A38B-07	TCGA-ZF-A9R4-01A	TP	Primary solid Tumor	A38B	1	1	1	0	1	Yes
457	BLCA	Kidney_urinary_bladder	TCGA-BT-A20U	TCGA-BT-A20U-01A-11R-A14Y-07	TCGA-BT-A20U-01A	TP	Primary solid Tumor	A14Y	1	1	1	0	1	Yes
458	BLCA	Kidney_urinary_bladder	TCGA-XF-AAN8	TCGA-XF-AAN8-01A-11R-A42T-07	TCGA-XF-AAN8-01A	TP	Primary solid Tumor	A42T	1	1	1	0	1	Yes
459	BLCA	Kidney_urinary_bladder	TCGA-BL-A13J	TCGA-BL-A13J-11A-13R-A10U-07	TCGA-BL-A13J-11A	NT	Solid Tissue Normal	A10U	1	1	1	0	1	Yes
460	BLCA	Kidney_urinary_bladder	TCGA-2F-A9KO	TCGA-2F-A9KO-01A-11R-A38B-07	TCGA-2F-A9KO-01A	TP	Primary solid Tumor	A38B	1	1	1	0	1	Yes
461	BLCA	Kidney_urinary_bladder	TCGA-G2-A2EC	TCGA-G2-A2EC-01A-11R-A180-07	TCGA-G2-A2EC-01A	TP	Primary solid Tumor	A180	1	1	1	0	1	Yes
462	BLCA	Kidney_urinary_bladder	TCGA-XF-A9SJ	TCGA-XF-A9SJ-01A-11R-A39I-07	TCGA-XF-A9SJ-01A	TP	Primary solid Tumor	A39I	1	1	1	0	1	Yes
463	BLCA	Kidney_urinary_bladder	TCGA-E7-A8O8	TCGA-E7-A8O8-01A-11R-A36F-07	TCGA-E7-A8O8-01A	TP	Primary solid Tumor	A36F	1	1	1	0	1	Yes
464	BLCA	Kidney_urinary_bladder	TCGA-GC-A3WC	TCGA-GC-A3WC-01A-31R-A22U-07	TCGA-GC-A3WC-01A	TP	Primary solid Tumor	A22U	1	1	1	0	1	Yes
465	BLCA	Kidney_urinary_bladder	TCGA-GC-A3YS	TCGA-GC-A3YS-01A-11R-A23N-07	TCGA-GC-A3YS-01A	TP	Primary solid Tumor	A23N	1	1	1	0	1	Yes
466	BLCA	Kidney_urinary_bladder	TCGA-FD-A3N5	TCGA-FD-A3N5-01A-11R-A21D-07	TCGA-FD-A3N5-01A	TP	Primary solid Tumor	A21D	1	1	1	0	1	Yes
467	BLCA	Kidney_urinary_bladder	TCGA-CU-A0YO	TCGA-CU-A0YO-01A-11R-A10U-07	TCGA-CU-A0YO-01A	TP	Primary solid Tumor	A10U	1	1	1	0	1	Yes
468	BLCA	Kidney_urinary_bladder	TCGA-G2-A2EJ	TCGA-G2-A2EJ-01A-11R-A180-07	TCGA-G2-A2EJ-01A	TP	Primary solid Tumor	A180	1	1	1	0	1	Yes
469	BLCA	Kidney_urinary_bladder	TCGA-FJ-A3Z7	TCGA-FJ-A3Z7-01A-12R-A23N-07	TCGA-FJ-A3Z7-01A	TP	Primary solid Tumor	A23N	1	1	1	0	1	Yes
470	BLCA	Kidney_urinary_bladder	TCGA-FD-A3SO	TCGA-FD-A3SO-01A-11R-A22U-07	TCGA-FD-A3SO-01A	TP	Primary solid Tumor	A22U	1	1	1	0	1	Yes
471	BLCA	Kidney_urinary_bladder	TCGA-BL-A13I	TCGA-BL-A13I-01A-11R-A13Y-07	TCGA-BL-A13I-01A	TP	Primary solid Tumor	A13Y	1	1	1	0	1	Yes
472	BLCA	Kidney_urinary_bladder	TCGA-ZF-A9R9	TCGA-ZF-A9R9-01A-11R-A38B-07	TCGA-ZF-A9R9-01A	TP	Primary solid Tumor	A38B	1	1	1	0	1	Yes
473	BLCA	Kidney_urinary_bladder	TCGA-ZF-A9RC	TCGA-ZF-A9RC-01A-11R-A38B-07	TCGA-ZF-A9RC-01A	TP	Primary solid Tumor	A38B	1	1	1	0	1	Yes
474	BLCA	Kidney_urinary_bladder	TCGA-XF-A9ST	TCGA-XF-A9ST-01A-11R-A42T-07	TCGA-XF-A9ST-01A	TP	Primary solid Tumor	A42T	1	1	1	0	1	Yes
475	BLCA	Kidney_urinary_bladder	TCGA-FD-A43P	TCGA-FD-A43P-01A-31R-A23W-07	TCGA-FD-A43P-01A	TP	Primary solid Tumor	A23W	1	1	1	0	1	Yes
476	BLCA	Kidney_urinary_bladder	TCGA-XF-A9SW	TCGA-XF-A9SW-01A-11R-A42T-07	TCGA-XF-A9SW-01A	TP	Primary solid Tumor	A42T	1	1	1	0	1	Yes
477	BLCA	Kidney_urinary_bladder	TCGA-DK-A3X1	TCGA-DK-A3X1-01A-12R-A22U-07	TCGA-DK-A3X1-01A	TP	Primary solid Tumor	A22U	1	1	1	0	1	Yes
478	BLCA	Kidney_urinary_bladder	TCGA-BT-A20U	TCGA-BT-A20U-11A-11R-A14Y-07	TCGA-BT-A20U-11A	NT	Solid Tissue Normal	A14Y	1	1	1	0	1	Yes
479	BLCA	Kidney_urinary_bladder	TCGA-CU-A3YL	TCGA-CU-A3YL-01A-11R-A22U-07	TCGA-CU-A3YL-01A	TP	Primary solid Tumor	A22U	1	1	1	0	1	Yes
480	BLCA	Kidney_urinary_bladder	TCGA-BT-A20W	TCGA-BT-A20W-01A-21R-A14Y-07	TCGA-BT-A20W-01A	TP	Primary solid Tumor	A14Y	1	1	1	0	1	Yes
481	BLCA	Kidney_urinary_bladder	TCGA-2F-A9KW	TCGA-2F-A9KW-01A-11R-A38B-07	TCGA-2F-A9KW-01A	TP	Primary solid Tumor	A38B	1	1	1	0	1	Yes
482	BLCA	Kidney_urinary_bladder	TCGA-FD-A3SM	TCGA-FD-A3SM-01A-11R-A22U-07	TCGA-FD-A3SM-01A	TP	Primary solid Tumor	A22U	1	1	1	0	1	Yes
483	BLCA	Kidney_urinary_bladder	TCGA-XF-A9SV	TCGA-XF-A9SV-01A-21R-A42T-07	TCGA-XF-A9SV-01A	TP	Primary solid Tumor	A42T	1	1	1	0	1	Yes
484	BLCA	Kidney_urinary_bladder	TCGA-BT-A20Q	TCGA-BT-A20Q-01A-11R-A14Y-07	TCGA-BT-A20Q-01A	TP	Primary solid Tumor	A14Y	1	1	1	0	1	Yes
485	BLCA	Kidney_urinary_bladder	TCGA-DK-A3IT	TCGA-DK-A3IT-01A-31R-A20F-07	TCGA-DK-A3IT-01A	TP	Primary solid Tumor	A20F	1	1	1	0	1	Yes
486	BLCA	Kidney_urinary_bladder	TCGA-FD-A5BT	TCGA-FD-A5BT-01A-11R-A26T-07	TCGA-FD-A5BT-01A	TP	Primary solid Tumor	A26T	1	1	1	0	1	Yes
487	BLCA	Kidney_urinary_bladder	TCGA-ZF-A9R2	TCGA-ZF-A9R2-01A-11R-A39I-07	TCGA-ZF-A9R2-01A	TP	Primary solid Tumor	A39I	1	1	1	0	1	Yes
488	BLCA	Kidney_urinary_bladder	TCGA-BT-A20X	TCGA-BT-A20X-01A-11R-A16R-07	TCGA-BT-A20X-01A	TP	Primary solid Tumor	A16R	1	1	1	0	1	Yes
489	BLCA	Kidney_urinary_bladder	TCGA-S5-AA26	TCGA-S5-AA26-01A-11R-A38B-07	TCGA-S5-AA26-01A	TP	Primary solid Tumor	A38B	1	1	1	0	1	Yes
490	BLCA	Kidney_urinary_bladder	TCGA-G2-A2EF	TCGA-G2-A2EF-01A-12R-A18C-07	TCGA-G2-A2EF-01A	TP	Primary solid Tumor	A18C	1	1	1	0	1	Yes
491	BLCA	Kidney_urinary_bladder	TCGA-BL-A13I	TCGA-BL-A13I-01A-11R-A277-07	TCGA-BL-A13I-01A	TP	Primary solid Tumor	A277	0	1	0	0	1	No
492	BLCA	Kidney_urinary_bladder	TCGA-FD-A3SL	TCGA-FD-A3SL-01A-21R-A22U-07	TCGA-FD-A3SL-01A	TP	Primary solid Tumor	A22U	1	1	1	0	1	Yes
493	BLCA	Kidney_urinary_bladder	TCGA-BT-A20W	TCGA-BT-A20W-11A-11R-A14Y-07	TCGA-BT-A20W-11A	NT	Solid Tissue Normal	A14Y	1	1	1	0	1	Yes
494	BLCA	Kidney_urinary_bladder	TCGA-XF-A8HG	TCGA-XF-A8HG-01A-11R-A36F-07	TCGA-XF-A8HG-01A	TP	Primary solid Tumor	A36F	1	1	1	0	1	Yes
495	BLCA	Kidney_urinary_bladder	TCGA-XF-A9SL	TCGA-XF-A9SL-01A-11R-A39I-07	TCGA-XF-A9SL-01A	TP	Primary solid Tumor	A39I	1	1	1	0	1	Yes
496	BLCA	Kidney_urinary_bladder	TCGA-ZF-A9R1	TCGA-ZF-A9R1-01A-11R-A39I-07	TCGA-ZF-A9R1-01A	TP	Primary solid Tumor	A39I	1	1	1	0	1	Yes
497	BLCA	Kidney_urinary_bladder	TCGA-FD-A3SS	TCGA-FD-A3SS-01A-12R-A22U-07	TCGA-FD-A3SS-01A	TP	Primary solid Tumor	A22U	1	1	1	0	1	Yes
498	BLCA	Kidney_urinary_bladder	TCGA-S5-A6DX	TCGA-S5-A6DX-01A-11R-A31N-07	TCGA-S5-A6DX-01A	TP	Primary solid Tumor	A31N	1	1	1	0	1	Yes
499	BLCA	Kidney_urinary_bladder	TCGA-BT-A20T	TCGA-BT-A20T-01A-11R-A14Y-07	TCGA-BT-A20T-01A	TP	Primary solid Tumor	A14Y	1	1	1	0	1	Yes
500	BLCA	Kidney_urinary_bladder	TCGA-ZF-A9R0	TCGA-ZF-A9R0-01A-11R-A38B-07	TCGA-ZF-A9R0-01A	TP	Primary solid Tumor	A38B	1	1	1	0	1	Yes
501	BLCA	Kidney_urinary_bladder	TCGA-BT-A20R	TCGA-BT-A20R-11A-11R-A16R-07	TCGA-BT-A20R-11A	NT	Solid Tissue Normal	A16R	1	1	1	0	1	Yes
502	BLCA	Kidney_urinary_bladder	TCGA-BT-A20V	TCGA-BT-A20V-01A-11R-A14Y-07	TCGA-BT-A20V-01A	TP	Primary solid Tumor	A14Y	1	1	1	0	1	Yes
503	BLCA	Kidney_urinary_bladder	TCGA-XF-A8HH	TCGA-XF-A8HH-01A-11R-A38B-07	TCGA-XF-A8HH-01A	TP	Primary solid Tumor	A38B	1	1	1	0	1	Yes
504	BLCA	Kidney_urinary_bladder	TCGA-FD-A3SP	TCGA-FD-A3SP-01A-31R-A22U-07	TCGA-FD-A3SP-01A	TP	Primary solid Tumor	A22U	1	1	1	0	1	Yes
505	BLCA	Kidney_urinary_bladder	TCGA-XF-A9SH	TCGA-XF-A9SH-01A-11R-A39I-07	TCGA-XF-A9SH-01A	TP	Primary solid Tumor	A39I	1	1	1	0	1	Yes
506	BLCA	Kidney_urinary_bladder	TCGA-XF-A9SI	TCGA-XF-A9SI-01A-11R-A39I-07	TCGA-XF-A9SI-01A	TP	Primary solid Tumor	A39I	1	1	1	0	1	Yes
507	BLCA	Kidney_urinary_bladder	TCGA-BT-A20Q	TCGA-BT-A20Q-11A-11R-A14Y-07	TCGA-BT-A20Q-11A	NT	Solid Tissue Normal	A14Y	1	1	1	0	1	Yes
508	BLCA	Kidney_urinary_bladder	TCGA-BT-A20R	TCGA-BT-A20R-01A-12R-A16R-07	TCGA-BT-A20R-01A	TP	Primary solid Tumor	A16R	1	1	1	0	1	Yes
509	BLCA	Kidney_urinary_bladder	TCGA-FD-A3SN	TCGA-FD-A3SN-01A-12R-A22U-07	TCGA-FD-A3SN-01A	TP	Primary solid Tumor	A22U	1	1	1	0	1	Yes
510	BLCA	Kidney_urinary_bladder	TCGA-CU-A5W6	TCGA-CU-A5W6-01A-11R-A28M-07	TCGA-CU-A5W6-01A	TP	Primary solid Tumor	A28M	1	1	1	0	1	Yes
511	BLCA	Kidney_urinary_bladder	TCGA-XF-A8HI	TCGA-XF-A8HI-01A-11R-A38B-07	TCGA-XF-A8HI-01A	TP	Primary solid Tumor	A38B	1	1	1	0	1	Yes
512	BLCA	Kidney_urinary_bladder	TCGA-CU-A72E	TCGA-CU-A72E-01A-12R-A33J-07	TCGA-CU-A72E-01A	TP	Primary solid Tumor	A33J	1	1	1	0	1	Yes
513	BRCA	Female	TCGA-BH-A0H0	TCGA-BH-A0H0-01A-11R-A056-07	TCGA-BH-A0H0-01A	TP	Primary solid Tumor	A056	1	1	1	0	1	Yes
514	BRCA	Female	TCGA-MS-A51U	TCGA-MS-A51U-01A-31R-A266-07	TCGA-MS-A51U-01A	TP	Primary solid Tumor	A266	1	1	1	0	1	Yes
515	BRCA	Female	TCGA-A2-A1FV	TCGA-A2-A1FV-01A-11R-A13Q-07	TCGA-A2-A1FV-01A	TP	Primary solid Tumor	A13Q	1	1	1	0	1	Yes
516	BRCA	Female	TCGA-BH-A0B3	TCGA-BH-A0B3-01A-11R-A056-07	TCGA-BH-A0B3-01A	TP	Primary solid Tumor	A056	1	1	1	0	1	Yes
517	BRCA	Female	TCGA-A8-A08Z	TCGA-A8-A08Z-01A-21R-A00Z-07	TCGA-A8-A08Z-01A	TP	Primary solid Tumor	A00Z	1	1	1	0	1	Yes
518	BRCA	Female	TCGA-E2-A1IO	TCGA-E2-A1IO-01A-11R-A144-07	TCGA-E2-A1IO-01A	TP	Primary solid Tumor	A144	1	1	1	0	1	Yes
519	BRCA	Female	TCGA-A2-A0YT	TCGA-A2-A0YT-01A-11R-A109-07	TCGA-A2-A0YT-01A	TP	Primary solid Tumor	A109	1	1	1	0	1	Yes
520	BRCA	Female	TCGA-B6-A0WT	TCGA-B6-A0WT-01A-11R-A109-07	TCGA-B6-A0WT-01A	TP	Primary solid Tumor	A109	1	1	1	0	1	Yes
521	BRCA	Female	TCGA-E2-A1IN	TCGA-E2-A1IN-01A-11R-A13Q-07	TCGA-E2-A1IN-01A	TP	Primary solid Tumor	A13Q	1	1	1	0	1	Yes
522	BRCA	Female	TCGA-A2-A0YK	TCGA-A2-A0YK-01A-22R-A109-07	TCGA-A2-A0YK-01A	TP	Primary solid Tumor	A109	1	1	1	0	1	Yes
523	BRCA	Female	TCGA-A8-A090	TCGA-A8-A090-01A-11R-A00Z-07	TCGA-A8-A090-01A	TP	Primary solid Tumor	A00Z	1	1	1	0	1	Yes
524	BRCA	Female	TCGA-B6-A0I2	TCGA-B6-A0I2-01A-11R-A034-07	TCGA-B6-A0I2-01A	TP	Primary solid Tumor	A034	1	1	1	0	1	Yes
525	BRCA	Female	TCGA-BH-A0GZ	TCGA-BH-A0GZ-01A-11R-A056-07	TCGA-BH-A0GZ-01A	TP	Primary solid Tumor	A056	1	1	1	0	1	Yes
526	BRCA	Female	TCGA-LD-A9QF	TCGA-LD-A9QF-01A-32R-A41B-07	TCGA-LD-A9QF-01A	TP	Primary solid Tumor	A41B	1	1	1	0	1	Yes
527	BRCA	Female	TCGA-AC-A3OD	TCGA-AC-A3OD-01B-06R-A22O-07	TCGA-AC-A3OD-01B	TP	Primary solid Tumor	A22O	0	1	0	0	1	No
528	BRCA	Female	TCGA-BH-A1FL	TCGA-BH-A1FL-01A-11R-A13Q-07	TCGA-BH-A1FL-01A	TP	Primary solid Tumor	A13Q	1	1	1	0	1	Yes
529	BRCA	Female	TCGA-A2-A0SV	TCGA-A2-A0SV-01A-11R-A084-07	TCGA-A2-A0SV-01A	TP	Primary solid Tumor	A084	1	1	1	0	1	Yes
530	BRCA	Female	TCGA-AC-A8OR	TCGA-AC-A8OR-01A-21R-A41B-07	TCGA-AC-A8OR-01A	TP	Primary solid Tumor	A41B	1	1	1	0	1	Yes
531	BRCA	Female	TCGA-BH-A1FJ	TCGA-BH-A1FJ-01A-11R-A13Q-07	TCGA-BH-A1FJ-01A	TP	Primary solid Tumor	A13Q	1	1	1	0	1	Yes
532	BRCA	Female	TCGA-A2-A0EU	TCGA-A2-A0EU-01A-22R-A056-07	TCGA-A2-A0EU-01A	TP	Primary solid Tumor	A056	1	1	1	0	1	Yes
533	BRCA	Female	TCGA-A2-A0YM	TCGA-A2-A0YM-01A-11R-A109-07	TCGA-A2-A0YM-01A	TP	Primary solid Tumor	A109	1	1	1	0	1	Yes
534	BRCA	Female	TCGA-E2-A9RU	TCGA-E2-A9RU-01A-11R-A41B-07	TCGA-E2-A9RU-01A	TP	Primary solid Tumor	A41B	1	1	1	0	1	Yes
535	BRCA	Female	TCGA-AR-A256	TCGA-AR-A256-01A-11R-A169-07	TCGA-AR-A256-01A	TP	Primary solid Tumor	A169	1	1	1	0	1	Yes
536	BRCA	Female	TCGA-AR-A2LE	TCGA-AR-A2LE-01A-11R-A180-07	TCGA-AR-A2LE-01A	TP	Primary solid Tumor	A180	1	1	1	0	1	Yes
537	BRCA	Female	TCGA-A2-A0YJ	TCGA-A2-A0YJ-01A-11R-A109-07	TCGA-A2-A0YJ-01A	TP	Primary solid Tumor	A109	1	1	1	0	1	Yes
538	BRCA	Female	TCGA-BH-A0EB	TCGA-BH-A0EB-01A-11R-A034-07	TCGA-BH-A0EB-01A	TP	Primary solid Tumor	A034	1	1	1	0	1	Yes
539	BRCA	Female	TCGA-B6-A0I1	TCGA-B6-A0I1-01A-11R-A21T-07	TCGA-B6-A0I1-01A	TP	Primary solid Tumor	A21T	1	1	1	0	1	Yes
540	BRCA	Female	TCGA-BH-A0H6	TCGA-BH-A0H6-01A-21R-A056-07	TCGA-BH-A0H6-01A	TP	Primary solid Tumor	A056	1	1	1	0	1	Yes
541	BRCA	Female	TCGA-D8-A27H	TCGA-D8-A27H-01A-11R-A16F-07	TCGA-D8-A27H-01A	TP	Primary solid Tumor	A16F	1	1	1	0	1	Yes
542	BRCA	Female	TCGA-BH-A0H3	TCGA-BH-A0H3-01A-11R-A12P-07	TCGA-BH-A0H3-01A	TP	Primary solid Tumor	A12P	1	1	1	0	1	Yes
543	BRCA	Female	TCGA-BH-A0DL	TCGA-BH-A0DL-11A-13R-A115-07	TCGA-BH-A0DL-11A	NT	Solid Tissue Normal	A115	1	1	1	0	1	Yes
544	BRCA	Female	TCGA-BH-A0DO	TCGA-BH-A0DO-01B-11R-A12D-07	TCGA-BH-A0DO-01B	TP	Primary solid Tumor	A12D	1	1	1	0	1	Yes
545	BRCA	Female	TCGA-BH-A0B3	TCGA-BH-A0B3-11B-21R-A089-07	TCGA-BH-A0B3-11B	NT	Solid Tissue Normal	A089	1	1	1	0	1	Yes
546	BRCA	Female	TCGA-BH-A1FM	TCGA-BH-A1FM-11B-23R-A13Q-07	TCGA-BH-A1FM-11B	NT	Solid Tissue Normal	A13Q	1	1	1	0	1	Yes
547	BRCA	Female	TCGA-A2-A0ER	TCGA-A2-A0ER-01A-21R-A034-07	TCGA-A2-A0ER-01A	TP	Primary solid Tumor	A034	1	1	1	0	1	Yes
548	BRCA	Female	TCGA-A2-A0YL	TCGA-A2-A0YL-01A-21R-A109-07	TCGA-A2-A0YL-01A	TP	Primary solid Tumor	A109	1	1	1	0	1	Yes
549	BRCA	Female	TCGA-EW-A1P3	TCGA-EW-A1P3-01A-11R-A144-07	TCGA-EW-A1P3-01A	TP	Primary solid Tumor	A144	1	1	1	0	1	Yes
550	BRCA	Female	TCGA-A2-A0ES	TCGA-A2-A0ES-01A-11R-A115-07	TCGA-A2-A0ES-01A	TP	Primary solid Tumor	A115	1	1	1	0	1	Yes
551	BRCA	Female	TCGA-A8-A08X	TCGA-A8-A08X-01A-21R-A00Z-07	TCGA-A8-A08X-01A	TP	Primary solid Tumor	A00Z	1	1	1	0	1	Yes
552	BRCA	Female	TCGA-B6-A0WV	TCGA-B6-A0WV-01A-11R-A109-07	TCGA-B6-A0WV-01A	TP	Primary solid Tumor	A109	1	1	1	0	1	Yes
553	BRCA	Female	TCGA-A2-A1FW	TCGA-A2-A1FW-01A-11R-A13Q-07	TCGA-A2-A1FW-01A	TP	Primary solid Tumor	A13Q	1	1	1	0	1	Yes
554	BRCA	Female	TCGA-BH-A0H5	TCGA-BH-A0H5-01A-21R-A115-07	TCGA-BH-A0H5-01A	TP	Primary solid Tumor	A115	1	1	1	0	1	Yes
555	BRCA	Female	TCGA-A2-A04R	TCGA-A2-A04R-01A-41R-A109-07	TCGA-A2-A04R-01A	TP	Primary solid Tumor	A109	1	1	1	0	1	Yes
556	BRCA	Female	TCGA-A8-A097	TCGA-A8-A097-01A-11R-A034-07	TCGA-A8-A097-01A	TP	Primary solid Tumor	A034	1	1	1	0	1	Yes
557	BRCA	Female	TCGA-B6-A0I5	TCGA-B6-A0I5-01A-11R-A034-07	TCGA-B6-A0I5-01A	TP	Primary solid Tumor	A034	1	1	1	0	1	Yes
558	BRCA	Female	TCGA-BH-A1FH	TCGA-BH-A1FH-01A-12R-A13Q-07	TCGA-BH-A1FH-01A	TP	Primary solid Tumor	A13Q	1	1	1	0	1	Yes
559	BRCA	Female	TCGA-B6-A0I6	TCGA-B6-A0I6-01A-11R-A034-07	TCGA-B6-A0I6-01A	TP	Primary solid Tumor	A034	1	1	1	0	1	Yes
560	BRCA	Female	TCGA-B6-A0I8	TCGA-B6-A0I8-01A-11R-A034-07	TCGA-B6-A0I8-01A	TP	Primary solid Tumor	A034	1	1	1	0	1	Yes
561	BRCA	Female	TCGA-AR-A255	TCGA-AR-A255-01A-11R-A169-07	TCGA-AR-A255-01A	TP	Primary solid Tumor	A169	1	1	1	0	1	Yes
562	BRCA	Female	TCGA-BH-A0B7	TCGA-BH-A0B7-01A-12R-A115-07	TCGA-BH-A0B7-01A	TP	Primary solid Tumor	A115	1	1	1	0	1	Yes
563	BRCA	Female	TCGA-A2-A0CX	TCGA-A2-A0CX-01A-21R-A00Z-07	TCGA-A2-A0CX-01A	TP	Primary solid Tumor	A00Z	1	1	1	0	1	Yes
564	BRCA	Female	TCGA-A2-A0ET	TCGA-A2-A0ET-01A-31R-A034-07	TCGA-A2-A0ET-01A	TP	Primary solid Tumor	A034	1	1	1	0	1	Yes
565	BRCA	Female	TCGA-BH-A0H9	TCGA-BH-A0H9-11A-22R-A466-07	TCGA-BH-A0H9-11A	NT	Solid Tissue Normal	A466	1	1	1	0	1	Yes
566	BRCA	Female	TCGA-A8-A091	TCGA-A8-A091-01A-11R-A00Z-07	TCGA-A8-A091-01A	TP	Primary solid Tumor	A00Z	1	1	1	0	1	Yes
567	BRCA	Female	TCGA-D8-A27G	TCGA-D8-A27G-01A-11R-A16F-07	TCGA-D8-A27G-01A	TP	Primary solid Tumor	A16F	1	1	1	0	1	Yes
568	BRCA	Female	TCGA-AR-A251	TCGA-AR-A251-01A-12R-A169-07	TCGA-AR-A251-01A	TP	Primary solid Tumor	A169	1	1	1	0	1	Yes
569	BRCA	Female	TCGA-D8-A27F	TCGA-D8-A27F-01A-11R-A16F-07	TCGA-D8-A27F-01A	TP	Primary solid Tumor	A16F	1	1	1	0	1	Yes
570	BRCA	Female	TCGA-BH-A0HK	TCGA-BH-A0HK-11A-11R-A089-07	TCGA-BH-A0HK-11A	NT	Solid Tissue Normal	A089	1	1	1	0	1	Yes
571	BRCA	Female	TCGA-BH-A0H7	TCGA-BH-A0H7-01A-13R-A056-07	TCGA-BH-A0H7-01A	TP	Primary solid Tumor	A056	1	1	1	0	1	Yes
572	BRCA	Female	TCGA-BH-A1FJ	TCGA-BH-A1FJ-11B-42R-A13Q-07	TCGA-BH-A1FJ-11B	NT	Solid Tissue Normal	A13Q	1	1	1	0	1	Yes
573	BRCA	Female	TCGA-D8-A27I	TCGA-D8-A27I-01A-11R-A16F-07	TCGA-D8-A27I-01A	TP	Primary solid Tumor	A16F	1	1	1	0	1	Yes
574	BRCA	Female	TCGA-BH-A0DO	TCGA-BH-A0DO-11A-22R-A12D-07	TCGA-BH-A0DO-11A	NT	Solid Tissue Normal	A12D	1	1	1	0	1	Yes
575	BRCA	Female	TCGA-E2-A15I	TCGA-E2-A15I-11A-32R-A137-07	TCGA-E2-A15I-11A	NT	Solid Tissue Normal	A137	1	1	1	0	1	Yes
576	BRCA	Female	TCGA-E2-A1II	TCGA-E2-A1II-01A-11R-A144-07	TCGA-E2-A1II-01A	TP	Primary solid Tumor	A144	1	1	1	0	1	Yes
577	BRCA	Female	TCGA-BH-A0AY	TCGA-BH-A0AY-11A-23R-A089-07	TCGA-BH-A0AY-11A	NT	Solid Tissue Normal	A089	1	1	1	0	1	Yes
578	BRCA	Female	TCGA-AR-A24X	TCGA-AR-A24X-01A-11R-A169-07	TCGA-AR-A24X-01A	TP	Primary solid Tumor	A169	1	1	1	0	1	Yes
579	BRCA	Female	TCGA-BH-A0EA	TCGA-BH-A0EA-01A-11R-A115-07	TCGA-BH-A0EA-01A	TP	Primary solid Tumor	A115	1	1	1	0	1	Yes
580	BRCA	Female	TCGA-BH-A0GY	TCGA-BH-A0GY-01A-11R-A056-07	TCGA-BH-A0GY-01A	TP	Primary solid Tumor	A056	1	1	1	0	1	Yes
581	BRCA	Female	TCGA-AC-A8OP	TCGA-AC-A8OP-01A-11R-A36F-07	TCGA-AC-A8OP-01A	TP	Primary solid Tumor	A36F	1	1	1	0	1	Yes
582	BRCA	Female	TCGA-BH-A0EI	TCGA-BH-A0EI-01A-11R-A115-07	TCGA-BH-A0EI-01A	TP	Primary solid Tumor	A115	1	1	1	0	1	Yes
583	BRCA	Female	TCGA-AR-A250	TCGA-AR-A250-01A-31R-A169-07	TCGA-AR-A250-01A	TP	Primary solid Tumor	A169	1	1	1	0	1	Yes
584	BRCA	Female	TCGA-E9-A1RF	TCGA-E9-A1RF-11A-32R-A157-07	TCGA-E9-A1RF-11A	NT	Solid Tissue Normal	A157	1	1	1	0	1	Yes
585	BRCA	Female	TCGA-A2-A0EP	TCGA-A2-A0EP-01A-52R-A22U-07	TCGA-A2-A0EP-01A	TP	Primary solid Tumor	A22U	1	1	1	0	1	Yes
586	BRCA	Female	TCGA-BH-A0B1	TCGA-BH-A0B1-01A-12R-A056-07	TCGA-BH-A0B1-01A	TP	Primary solid Tumor	A056	1	1	1	0	1	Yes
587	BRCA	Female	TCGA-A2-A0YF	TCGA-A2-A0YF-01A-21R-A109-07	TCGA-A2-A0YF-01A	TP	Primary solid Tumor	A109	1	1	1	0	1	Yes
588	BRCA	Female	TCGA-D8-A1XC	TCGA-D8-A1XC-01A-11R-A14D-07	TCGA-D8-A1XC-01A	TP	Primary solid Tumor	A14D	1	1	1	0	1	Yes
589	BRCA	Female	TCGA-A2-A0YG	TCGA-A2-A0YG-01A-21R-A109-07	TCGA-A2-A0YG-01A	TP	Primary solid Tumor	A109	1	1	1	0	1	Yes
590	BRCA	Female	TCGA-E2-A1IJ	TCGA-E2-A1IJ-01A-11R-A144-07	TCGA-E2-A1IJ-01A	TP	Primary solid Tumor	A144	1	1	1	0	1	Yes
591	BRCA	Female	TCGA-D8-A1XZ	TCGA-D8-A1XZ-01A-11R-A14M-07	TCGA-D8-A1XZ-01A	TP	Primary solid Tumor	A14M	1	1	1	0	1	Yes
592	BRCA	Female	TCGA-D8-A1Y0	TCGA-D8-A1Y0-01A-11R-A14M-07	TCGA-D8-A1Y0-01A	TP	Primary solid Tumor	A14M	1	1	1	0	1	Yes
593	BRCA	Female	TCGA-AC-A8OQ	TCGA-AC-A8OQ-01A-11R-A41B-07	TCGA-AC-A8OQ-01A	TP	Primary solid Tumor	A41B	1	1	1	0	1	Yes
594	BRCA	Female	TCGA-BH-A0B0	TCGA-BH-A0B0-01A-21R-A115-07	TCGA-BH-A0B0-01A	TP	Primary solid Tumor	A115	1	1	1	0	1	Yes
595	BRCA	Female	TCGA-AC-A7VC	TCGA-AC-A7VC-01A-11R-A352-07	TCGA-AC-A7VC-01A	TP	Primary solid Tumor	A352	1	1	1	0	1	Yes
596	BRCA	Female	TCGA-A2-A0ST	TCGA-A2-A0ST-01A-12R-A084-07	TCGA-A2-A0ST-01A	TP	Primary solid Tumor	A084	1	1	1	0	1	Yes
597	BRCA	Female	TCGA-BH-A0H5	TCGA-BH-A0H5-11A-62R-A115-07	TCGA-BH-A0H5-11A	NT	Solid Tissue Normal	A115	1	1	1	0	1	Yes
598	BRCA	Female	TCGA-BH-A1FH	TCGA-BH-A1FH-11B-42R-A13Q-07	TCGA-BH-A1FH-11B	NT	Solid Tissue Normal	A13Q	1	1	1	0	1	Yes
599	BRCA	Female	TCGA-AR-A252	TCGA-AR-A252-01A-11R-A169-07	TCGA-AR-A252-01A	TP	Primary solid Tumor	A169	1	1	1	0	1	Yes
600	BRCA	Female	TCGA-A2-A0EM	TCGA-A2-A0EM-01A-11R-A034-07	TCGA-A2-A0EM-01A	TP	Primary solid Tumor	A034	1	1	1	0	1	Yes
601	BRCA	Female	TCGA-A8-A09A	TCGA-A8-A09A-01A-11R-A00Z-07	TCGA-A8-A09A-01A	TP	Primary solid Tumor	A00Z	1	1	1	0	1	Yes
602	BRCA	Female	TCGA-E2-A1IH	TCGA-E2-A1IH-01A-11R-A13Q-07	TCGA-E2-A1IH-01A	TP	Primary solid Tumor	A13Q	1	1	1	0	1	Yes
603	BRCA	Female	TCGA-A2-A0YH	TCGA-A2-A0YH-01A-11R-A109-07	TCGA-A2-A0YH-01A	TP	Primary solid Tumor	A109	1	1	1	0	1	Yes
604	BRCA	Female	TCGA-A2-A0YI	TCGA-A2-A0YI-01A-31R-A10J-07	TCGA-A2-A0YI-01A	TP	Primary solid Tumor	A10J	1	1	1	0	1	Yes
605	BRCA	Female	TCGA-BH-A18H	TCGA-BH-A18H-01A-11R-A12D-07	TCGA-BH-A18H-01A	TP	Primary solid Tumor	A12D	1	1	1	0	1	Yes
606	BRCA	Female	TCGA-B6-A0WW	TCGA-B6-A0WW-01A-11R-A109-07	TCGA-B6-A0WW-01A	TP	Primary solid Tumor	A109	1	1	1	0	1	Yes
607	BRCA	Female	TCGA-A2-A0EY	TCGA-A2-A0EY-01A-11R-A034-07	TCGA-A2-A0EY-01A	TP	Primary solid Tumor	A034	1	1	1	0	1	Yes
608	BRCA	Female	TCGA-E2-A1LH	TCGA-E2-A1LH-11A-22R-A14D-07	TCGA-E2-A1LH-11A	NT	Solid Tissue Normal	A14D	1	1	1	0	1	Yes
609	BRCA	Female	TCGA-A8-A092	TCGA-A8-A092-01A-11R-A00Z-07	TCGA-A8-A092-01A	TP	Primary solid Tumor	A00Z	1	1	1	0	1	Yes
610	BRCA	Female	TCGA-BH-A0DL	TCGA-BH-A0DL-01A-11R-A115-07	TCGA-BH-A0DL-01A	TP	Primary solid Tumor	A115	1	1	1	0	1	Yes
611	BRCA	Female	TCGA-A2-A0EN	TCGA-A2-A0EN-01A-13R-A084-07	TCGA-A2-A0EN-01A	TP	Primary solid Tumor	A084	1	1	1	0	1	Yes
612	BRCA	Female	TCGA-E2-A15F	TCGA-E2-A15F-01A-11R-A115-07	TCGA-E2-A15F-01A	TP	Primary solid Tumor	A115	1	1	1	0	1	Yes
613	BRCA	Female	TCGA-B6-A0IK	TCGA-B6-A0IK-01A-12R-A056-07	TCGA-B6-A0IK-01A	TP	Primary solid Tumor	A056	1	1	1	0	1	Yes
614	BRCA	Female	TCGA-E9-A1RG	TCGA-E9-A1RG-01A-11R-A14D-07	TCGA-E9-A1RG-01A	TP	Primary solid Tumor	A14D	1	1	1	0	1	Yes
615	BRCA	Female	TCGA-E2-A15H	TCGA-E2-A15H-01A-11R-A12D-07	TCGA-E2-A15H-01A	TP	Primary solid Tumor	A12D	1	1	1	0	1	Yes
616	BRCA	Female	TCGA-BH-A0B7	TCGA-BH-A0B7-11A-34R-A115-07	TCGA-BH-A0B7-11A	NT	Solid Tissue Normal	A115	1	1	1	0	1	Yes
617	BRCA	Female	TCGA-AC-A23C	TCGA-AC-A23C-01A-12R-A169-07	TCGA-AC-A23C-01A	TP	Primary solid Tumor	A169	1	1	1	0	1	Yes
618	BRCA	Female	TCGA-BH-A0H7	TCGA-BH-A0H7-11A-13R-A089-07	TCGA-BH-A0H7-11A	NT	Solid Tissue Normal	A089	1	1	1	0	1	Yes
619	BRCA	Female	TCGA-E2-A576	TCGA-E2-A576-01A-11R-A31O-07	TCGA-E2-A576-01A	TP	Primary solid Tumor	A31O	1	1	1	0	1	Yes
620	BRCA	Female	TCGA-A2-A0D2	TCGA-A2-A0D2-01A-21R-A034-07	TCGA-A2-A0D2-01A	TP	Primary solid Tumor	A034	1	1	1	0	1	Yes
621	BRCA	Female	TCGA-BH-A0EE	TCGA-BH-A0EE-01A-11R-A034-07	TCGA-BH-A0EE-01A	TP	Primary solid Tumor	A034	1	1	1	0	1	Yes
622	BRCA	Female	TCGA-A2-A0EX	TCGA-A2-A0EX-01A-21R-A034-07	TCGA-A2-A0EX-01A	TP	Primary solid Tumor	A034	1	1	1	0	1	Yes
623	BRCA	Female	TCGA-A2-A1FX	TCGA-A2-A1FX-01A-11R-A13Q-07	TCGA-A2-A1FX-01A	TP	Primary solid Tumor	A13Q	1	1	1	0	1	Yes
624	BRCA	Female	TCGA-E9-A1RE	TCGA-E9-A1RE-01A-11R-A157-07	TCGA-E9-A1RE-01A	TP	Primary solid Tumor	A157	1	1	1	0	1	Yes
625	BRCA	Female	TCGA-A2-A0EO	TCGA-A2-A0EO-01A-11R-A034-07	TCGA-A2-A0EO-01A	TP	Primary solid Tumor	A034	1	1	1	0	1	Yes
626	BRCA	Female	TCGA-A8-A0AD	TCGA-A8-A0AD-01A-11R-A056-07	TCGA-A8-A0AD-01A	TP	Primary solid Tumor	A056	1	1	1	0	1	Yes
627	BRCA	Female	TCGA-D8-A1XB	TCGA-D8-A1XB-01A-11R-A14D-07	TCGA-D8-A1XB-01A	TP	Primary solid Tumor	A14D	1	1	1	0	1	Yes
628	BRCA	Female	TCGA-JL-A3YX	TCGA-JL-A3YX-01A-11R-A22U-07	TCGA-JL-A3YX-01A	TP	Primary solid Tumor	A22U	1	1	1	0	1	Yes
629	BRCA	Female	TCGA-AC-A3EH	TCGA-AC-A3EH-01A-22R-A22K-07	TCGA-AC-A3EH-01A	TP	Primary solid Tumor	A22K	1	1	1	0	1	Yes
630	BRCA	Female	TCGA-AC-A3HN	TCGA-AC-A3HN-01A-11R-A213-07	TCGA-AC-A3HN-01A	TP	Primary solid Tumor	A213	1	1	1	0	1	Yes
631	BRCA	Female	TCGA-BH-A1EW	TCGA-BH-A1EW-11B-33R-A137-07	TCGA-BH-A1EW-11B	NT	Solid Tissue Normal	A137	1	1	1	0	1	Yes
632	BRCA	Female	TCGA-E2-A1IL	TCGA-E2-A1IL-01A-11R-A14D-07	TCGA-E2-A1IL-01A	TP	Primary solid Tumor	A14D	1	1	1	0	1	Yes
633	BRCA	Female	TCGA-A2-A0EV	TCGA-A2-A0EV-01A-11R-A034-07	TCGA-A2-A0EV-01A	TP	Primary solid Tumor	A034	1	1	1	0	1	Yes
634	BRCA	Female	TCGA-AC-A7VB	TCGA-AC-A7VB-01A-11R-A352-07	TCGA-AC-A7VB-01A	TP	Primary solid Tumor	A352	1	1	1	0	1	Yes
635	BRCA	Female	TCGA-EW-A6SD	TCGA-EW-A6SD-01A-12R-A33J-07	TCGA-EW-A6SD-01A	TP	Primary solid Tumor	A33J	1	1	1	0	1	Yes
636	BRCA	Female	TCGA-D8-A27E	TCGA-D8-A27E-01A-11R-A16F-07	TCGA-D8-A27E-01A	TP	Primary solid Tumor	A16F	1	1	1	0	1	Yes
637	BRCA	Female	TCGA-LD-A7W6	TCGA-LD-A7W6-01A-81R-A352-07	TCGA-LD-A7W6-01A	TP	Primary solid Tumor	A352	1	1	1	0	1	Yes
638	BRCA	Female	TCGA-E9-A1RF	TCGA-E9-A1RF-01A-11R-A157-07	TCGA-E9-A1RF-01A	TP	Primary solid Tumor	A157	1	1	1	0	1	Yes
639	BRCA	Female	TCGA-A2-A1G0	TCGA-A2-A1G0-01A-11R-A13Q-07	TCGA-A2-A1G0-01A	TP	Primary solid Tumor	A13Q	1	1	1	0	1	Yes
640	BRCA	Female	TCGA-A8-A095	TCGA-A8-A095-01A-11R-A00Z-07	TCGA-A8-A095-01A	TP	Primary solid Tumor	A00Z	1	1	1	0	1	Yes
641	BRCA	Female	TCGA-E2-A1IG	TCGA-E2-A1IG-11A-22R-A144-07	TCGA-E2-A1IG-11A	NT	Solid Tissue Normal	A144	1	1	1	0	1	Yes
642	BRCA	Female	TCGA-A2-A1G1	TCGA-A2-A1G1-01A-21R-A13Q-07	TCGA-A2-A1G1-01A	TP	Primary solid Tumor	A13Q	1	1	1	0	1	Yes
643	BRCA	Female	TCGA-D8-A1XV	TCGA-D8-A1XV-01A-11R-A14M-07	TCGA-D8-A1XV-01A	TP	Primary solid Tumor	A14M	1	1	1	0	1	Yes
644	BRCA	Female	TCGA-D8-A1XW	TCGA-D8-A1XW-01A-11R-A14M-07	TCGA-D8-A1XW-01A	TP	Primary solid Tumor	A14M	1	1	1	0	1	Yes
645	BRCA	Female	TCGA-B6-A0WS	TCGA-B6-A0WS-01A-11R-A115-07	TCGA-B6-A0WS-01A	TP	Primary solid Tumor	A115	1	1	1	0	1	Yes
646	BRCA	Female	TCGA-BH-A1EY	TCGA-BH-A1EY-01A-11R-A13Q-07	TCGA-BH-A1EY-01A	TP	Primary solid Tumor	A13Q	1	1	1	0	1	Yes
647	BRCA	Female	TCGA-LL-A9Q3	TCGA-LL-A9Q3-01A-11R-A41B-07	TCGA-LL-A9Q3-01A	TP	Primary solid Tumor	A41B	1	1	1	0	1	Yes
648	BRCA	Female	TCGA-EW-A1OY	TCGA-EW-A1OY-01A-11R-A144-07	TCGA-EW-A1OY-01A	TP	Primary solid Tumor	A144	1	1	1	0	1	Yes
649	BRCA	Female	TCGA-BH-A28O	TCGA-BH-A28O-01A-11R-A22K-07	TCGA-BH-A28O-01A	TP	Primary solid Tumor	A22K	1	1	1	0	1	Yes
650	BRCA	Female	TCGA-BH-A0HB	TCGA-BH-A0HB-01A-11R-A056-07	TCGA-BH-A0HB-01A	TP	Primary solid Tumor	A056	1	1	1	0	1	Yes
651	BRCA	Female	TCGA-A2-A1FZ	TCGA-A2-A1FZ-01A-51R-A14D-07	TCGA-A2-A1FZ-01A	TP	Primary solid Tumor	A14D	1	1	1	0	1	Yes
652	BRCA	Female	TCGA-BH-A1FG	TCGA-BH-A1FG-01A-11R-A13Q-07	TCGA-BH-A1FG-01A	TP	Primary solid Tumor	A13Q	1	1	1	0	1	Yes
653	BRCA	Female	TCGA-A7-A426	TCGA-A7-A426-01A-22R-A24H-07	TCGA-A7-A426-01A	TP	Primary solid Tumor	A24H	1	1	1	0	1	Yes
654	BRCA	Female	TCGA-A7-A4SA	TCGA-A7-A4SA-01A-11R-A266-07	TCGA-A7-A4SA-01A	TP	Primary solid Tumor	A266	1	1	1	0	1	Yes
655	BRCA	Female	TCGA-A2-A04T	TCGA-A2-A04T-01A-21R-A034-07	TCGA-A2-A04T-01A	TP	Primary solid Tumor	A034	1	1	1	0	1	Yes
656	BRCA	Female	TCGA-D8-A27K	TCGA-D8-A27K-01A-11R-A16F-07	TCGA-D8-A27K-01A	TP	Primary solid Tumor	A16F	1	1	1	0	1	Yes
657	BRCA	Female	TCGA-E2-A15J	TCGA-E2-A15J-01A-11R-A12P-07	TCGA-E2-A15J-01A	TP	Primary solid Tumor	A12P	1	1	1	0	1	Yes
658	BRCA	Female	TCGA-D8-A1XY	TCGA-D8-A1XY-01A-11R-A14M-07	TCGA-D8-A1XY-01A	TP	Primary solid Tumor	A14M	1	1	1	0	1	Yes
659	BRCA	Female	TCGA-AC-A62X	TCGA-AC-A62X-01A-11R-A29R-07	TCGA-AC-A62X-01A	TP	Primary solid Tumor	A29R	1	1	1	0	1	Yes
660	BRCA	Female	TCGA-S3-A6ZF	TCGA-S3-A6ZF-01A-32R-A32P-07	TCGA-S3-A6ZF-01A	TP	Primary solid Tumor	A32P	1	1	1	0	1	Yes
661	BRCA	Female	TCGA-AC-A6NO	TCGA-AC-A6NO-01A-12R-A33J-07	TCGA-AC-A6NO-01A	TP	Primary solid Tumor	A33J	1	1	1	0	1	Yes
662	BRCA	Female	TCGA-D8-A1Y3	TCGA-D8-A1Y3-01A-11R-A157-07	TCGA-D8-A1Y3-01A	TP	Primary solid Tumor	A157	1	1	1	0	1	Yes
663	BRCA	Female	TCGA-AC-A2FM	TCGA-AC-A2FM-11B-32R-A19W-07	TCGA-AC-A2FM-11B	NT	Solid Tissue Normal	A19W	1	1	1	0	1	Yes
664	BRCA	Female	TCGA-BH-A0DK	TCGA-BH-A0DK-11A-13R-A089-07	TCGA-BH-A0DK-11A	NT	Solid Tissue Normal	A089	1	1	1	0	1	Yes
665	BRCA	Female	TCGA-E2-A2P5	TCGA-E2-A2P5-01A-11R-A19W-07	TCGA-E2-A2P5-01A	TP	Primary solid Tumor	A19W	1	1	1	0	1	Yes
666	BRCA	Female	TCGA-E2-A2P6	TCGA-E2-A2P6-01A-11R-A19W-07	TCGA-E2-A2P6-01A	TP	Primary solid Tumor	A19W	1	1	1	0	1	Yes
667	BRCA	Female	TCGA-AC-A2QJ	TCGA-AC-A2QJ-01A-12R-A19W-07	TCGA-AC-A2QJ-01A	TP	Primary solid Tumor	A19W	1	1	1	0	1	Yes
668	BRCA	Female	TCGA-AC-A3BB	TCGA-AC-A3BB-01A-21R-A19W-07	TCGA-AC-A3BB-01A	TP	Primary solid Tumor	A19W	1	1	1	0	1	Yes
669	BRCA	Female	TCGA-D8-A73W	TCGA-D8-A73W-01A-22R-A352-07	TCGA-D8-A73W-01A	TP	Primary solid Tumor	A352	1	1	1	0	1	Yes
670	BRCA	Female	TCGA-A2-A0CV	TCGA-A2-A0CV-01A-31R-A115-07	TCGA-A2-A0CV-01A	TP	Primary solid Tumor	A115	1	1	1	0	1	Yes
671	BRCA	Female	TCGA-A2-A0CW	TCGA-A2-A0CW-01A-21R-A115-07	TCGA-A2-A0CW-01A	TP	Primary solid Tumor	A115	1	1	1	0	1	Yes
672	BRCA	Female	TCGA-C8-A8HQ	TCGA-C8-A8HQ-01A-11R-A36F-07	TCGA-C8-A8HQ-01A	TP	Primary solid Tumor	A36F	1	1	1	0	1	Yes
673	BRCA	Female	TCGA-C8-A8HR	TCGA-C8-A8HR-01A-11R-A36F-07	TCGA-C8-A8HR-01A	TP	Primary solid Tumor	A36F	1	1	1	0	1	Yes
674	BRCA	Female	TCGA-E2-A1LL	TCGA-E2-A1LL-01A-11R-A144-07	TCGA-E2-A1LL-01A	TP	Primary solid Tumor	A144	1	1	1	0	1	Yes
675	BRCA	Female	TCGA-D8-A27R	TCGA-D8-A27R-01A-11R-A16F-07	TCGA-D8-A27R-01A	TP	Primary solid Tumor	A16F	1	1	1	0	1	Yes
676	BRCA	Female	TCGA-EW-A1OZ	TCGA-EW-A1OZ-01A-11R-A144-07	TCGA-EW-A1OZ-01A	TP	Primary solid Tumor	A144	1	1	1	0	1	Yes
677	BRCA	Female	TCGA-EW-A1P1	TCGA-EW-A1P1-01A-31R-A14D-07	TCGA-EW-A1P1-01A	TP	Primary solid Tumor	A14D	1	1	1	0	1	Yes
678	BRCA	Female	TCGA-E2-A1IE	TCGA-E2-A1IE-01A-11R-A13Q-07	TCGA-E2-A1IE-01A	TP	Primary solid Tumor	A13Q	1	1	1	0	1	Yes
679	BRCA	Female	TCGA-A2-A0D4	TCGA-A2-A0D4-01A-11R-A00Z-07	TCGA-A2-A0D4-01A	TP	Primary solid Tumor	A00Z	1	1	1	0	1	Yes
680	BRCA	Female	TCGA-E2-A1BD	TCGA-E2-A1BD-01A-11R-A12P-07	TCGA-E2-A1BD-01A	TP	Primary solid Tumor	A12P	1	1	1	0	1	Yes
681	BRCA	Female	TCGA-E2-A1IF	TCGA-E2-A1IF-01A-11R-A144-07	TCGA-E2-A1IF-01A	TP	Primary solid Tumor	A144	1	1	1	0	1	Yes
682	BRCA	Female	TCGA-D8-A1XU	TCGA-D8-A1XU-01A-11R-A14M-07	TCGA-D8-A1XU-01A	TP	Primary solid Tumor	A14M	1	1	1	0	1	Yes
683	BRCA	Female	TCGA-AO-A129	TCGA-AO-A129-01A-21R-A10J-07	TCGA-AO-A129-01A	TP	Primary solid Tumor	A10J	1	1	1	0	1	Yes
684	BRCA	Female	TCGA-AO-A12A	TCGA-AO-A12A-01A-21R-A115-07	TCGA-AO-A12A-01A	TP	Primary solid Tumor	A115	1	1	1	0	1	Yes
685	BRCA	Female	TCGA-A2-A0EQ	TCGA-A2-A0EQ-01A-11R-A034-07	TCGA-A2-A0EQ-01A	TP	Primary solid Tumor	A034	1	1	1	0	1	Yes
686	BRCA	Female	TCGA-E9-A1RA	TCGA-E9-A1RA-01A-11R-A14D-07	TCGA-E9-A1RA-01A	TP	Primary solid Tumor	A14D	1	1	1	0	1	Yes
687	BRCA	Female	TCGA-A2-A0D1	TCGA-A2-A0D1-01A-11R-A034-07	TCGA-A2-A0D1-01A	TP	Primary solid Tumor	A034	1	1	1	0	1	Yes
688	BRCA	Female	TCGA-AR-A24V	TCGA-AR-A24V-01A-21R-A169-07	TCGA-AR-A24V-01A	TP	Primary solid Tumor	A169	1	1	1	0	1	Yes
689	BRCA	Female	TCGA-A2-A0EW	TCGA-A2-A0EW-01A-21R-A115-07	TCGA-A2-A0EW-01A	TP	Primary solid Tumor	A115	1	1	1	0	1	Yes
690	BRCA	Female	TCGA-D8-A1Y2	TCGA-D8-A1Y2-01A-11R-A157-07	TCGA-D8-A1Y2-01A	TP	Primary solid Tumor	A157	1	1	1	0	1	Yes
691	BRCA	Female	TCGA-E9-A1RD	TCGA-E9-A1RD-01A-11R-A157-07	TCGA-E9-A1RD-01A	TP	Primary solid Tumor	A157	1	1	1	0	1	Yes
692	BRCA	Female	TCGA-E9-A1RD	TCGA-E9-A1RD-11A-33R-A157-07	TCGA-E9-A1RD-11A	NT	Solid Tissue Normal	A157	1	1	1	0	1	Yes
693	BRCA	Female	TCGA-AO-A12H	TCGA-AO-A12H-01A-11R-A115-07	TCGA-AO-A12H-01A	TP	Primary solid Tumor	A115	1	1	1	0	1	Yes
694	BRCA	Female	TCGA-AO-A1KO	TCGA-AO-A1KO-01A-31R-A13Q-07	TCGA-AO-A1KO-01A	TP	Primary solid Tumor	A13Q	1	1	1	0	1	Yes
695	BRCA	Female	TCGA-AO-A1KP	TCGA-AO-A1KP-01A-11R-A13Q-07	TCGA-AO-A1KP-01A	TP	Primary solid Tumor	A13Q	1	1	1	0	1	Yes
696	BRCA	Female	TCGA-A2-A04U	TCGA-A2-A04U-01A-11R-A115-07	TCGA-A2-A04U-01A	TP	Primary solid Tumor	A115	1	1	1	0	1	Yes
697	BRCA	Female	TCGA-E2-A15I	TCGA-E2-A15I-01A-21R-A137-07	TCGA-E2-A15I-01A	TP	Primary solid Tumor	A137	1	1	1	0	1	Yes
698	BRCA	Female	TCGA-BH-A1FM	TCGA-BH-A1FM-01A-11R-A13Q-07	TCGA-BH-A1FM-01A	TP	Primary solid Tumor	A13Q	1	1	1	0	1	Yes
699	BRCA	Female	TCGA-BH-A1FN	TCGA-BH-A1FN-11A-34R-A13Q-07	TCGA-BH-A1FN-11A	NT	Solid Tissue Normal	A13Q	1	1	1	0	1	Yes
700	BRCA	Female	TCGA-AC-A62Y	TCGA-AC-A62Y-01A-11R-A29R-07	TCGA-AC-A62Y-01A	TP	Primary solid Tumor	A29R	1	1	1	0	1	Yes
701	BRCA	Female	TCGA-BH-A0HA	TCGA-BH-A0HA-01A-11R-A12P-07	TCGA-BH-A0HA-01A	TP	Primary solid Tumor	A12P	1	1	1	0	1	Yes
702	BRCA	Female	TCGA-A8-A085	TCGA-A8-A085-01A-11R-A00Z-07	TCGA-A8-A085-01A	TP	Primary solid Tumor	A00Z	1	1	1	0	1	Yes
703	BRCA	Female	TCGA-A8-A086	TCGA-A8-A086-01A-11R-A00Z-07	TCGA-A8-A086-01A	TP	Primary solid Tumor	A00Z	1	1	1	0	1	Yes
704	BRCA	Female	TCGA-AC-A2FO	TCGA-AC-A2FO-01A-11R-A180-07	TCGA-AC-A2FO-01A	TP	Primary solid Tumor	A180	1	1	1	0	1	Yes
705	BRCA	Female	TCGA-A8-A0A9	TCGA-A8-A0A9-01A-11R-A00Z-07	TCGA-A8-A0A9-01A	TP	Primary solid Tumor	A00Z	1	1	1	0	1	Yes
706	BRCA	Female	TCGA-D8-A3Z6	TCGA-D8-A3Z6-01A-11R-A239-07	TCGA-D8-A3Z6-01A	TP	Primary solid Tumor	A239	1	1	1	0	1	Yes
707	BRCA	Female	TCGA-LL-A6FR	TCGA-LL-A6FR-01A-12R-A31O-07	TCGA-LL-A6FR-01A	TP	Primary solid Tumor	A31O	1	1	1	0	1	Yes
708	BRCA	Female	TCGA-JL-A3YW	TCGA-JL-A3YW-01A-12R-A239-07	TCGA-JL-A3YW-01A	TP	Primary solid Tumor	A239	1	1	1	0	1	Yes
709	BRCA	Female	TCGA-BH-A0AU	TCGA-BH-A0AU-01A-11R-A12P-07	TCGA-BH-A0AU-01A	TP	Primary solid Tumor	A12P	1	1	1	0	1	Yes
710	BRCA	Female	TCGA-BH-A0AU	TCGA-BH-A0AU-11A-11R-A12P-07	TCGA-BH-A0AU-11A	NT	Solid Tissue Normal	A12P	1	1	1	0	1	Yes
711	BRCA	Female	TCGA-BH-A0AV	TCGA-BH-A0AV-01A-31R-A115-07	TCGA-BH-A0AV-01A	TP	Primary solid Tumor	A115	1	1	1	0	1	Yes
712	BRCA	Female	TCGA-BH-A0AW	TCGA-BH-A0AW-01A-11R-A056-07	TCGA-BH-A0AW-01A	TP	Primary solid Tumor	A056	1	1	1	0	1	Yes
713	BRCA	Female	TCGA-E2-A574	TCGA-E2-A574-01A-11R-A29R-07	TCGA-E2-A574-01A	TP	Primary solid Tumor	A29R	1	1	1	0	1	Yes
714	BRCA	Female	TCGA-D8-A27P	TCGA-D8-A27P-01A-11R-A16F-07	TCGA-D8-A27P-01A	TP	Primary solid Tumor	A16F	1	1	1	0	1	Yes
715	BRCA	Female	TCGA-EW-A1OX	TCGA-EW-A1OX-01A-11R-A144-07	TCGA-EW-A1OX-01A	TP	Primary solid Tumor	A144	1	1	1	0	1	Yes
716	BRCA	Female	TCGA-A2-A0D3	TCGA-A2-A0D3-01A-11R-A115-07	TCGA-A2-A0D3-01A	TP	Primary solid Tumor	A115	1	1	1	0	1	Yes
717	BRCA	Female	TCGA-AO-A124	TCGA-AO-A124-01A-11R-A10J-07	TCGA-AO-A124-01A	TP	Primary solid Tumor	A10J	1	1	1	0	1	Yes
718	BRCA	Female	TCGA-A8-A093	TCGA-A8-A093-01A-11R-A00Z-07	TCGA-A8-A093-01A	TP	Primary solid Tumor	A00Z	1	1	1	0	1	Yes
719	BRCA	Female	TCGA-A8-A094	TCGA-A8-A094-01A-11R-A00Z-07	TCGA-A8-A094-01A	TP	Primary solid Tumor	A00Z	1	1	1	0	1	Yes
720	BRCA	Female	TCGA-EW-A1P4	TCGA-EW-A1P4-01A-21R-A144-07	TCGA-EW-A1P4-01A	TP	Primary solid Tumor	A144	1	1	1	0	1	Yes
721	BRCA	Female	TCGA-EW-A1P5	TCGA-EW-A1P5-01A-11R-A144-07	TCGA-EW-A1P5-01A	TP	Primary solid Tumor	A144	1	1	1	0	1	Yes
722	BRCA	Female	TCGA-AO-A128	TCGA-AO-A128-01A-11R-A10J-07	TCGA-AO-A128-01A	TP	Primary solid Tumor	A10J	1	1	1	0	1	Yes
723	BRCA	Female	TCGA-BH-A0B5	TCGA-BH-A0B5-11A-23R-A12P-07	TCGA-BH-A0B5-11A	NT	Solid Tissue Normal	A12P	1	1	1	0	1	Yes
724	BRCA	Female	TCGA-E9-A54X	TCGA-E9-A54X-01A-11R-A266-07	TCGA-E9-A54X-01A	TP	Primary solid Tumor	A266	1	1	1	0	1	Yes
725	BRCA	Female	TCGA-E9-A5FK	TCGA-E9-A5FK-01A-11R-A27Q-07	TCGA-E9-A5FK-01A	TP	Primary solid Tumor	A27Q	1	1	1	0	1	Yes
726	BRCA	Female	TCGA-AC-A23E	TCGA-AC-A23E-01A-11R-A157-07	TCGA-AC-A23E-01A	TP	Primary solid Tumor	A157	1	1	1	0	1	Yes
727	BRCA	Female	TCGA-EW-A1OW	TCGA-EW-A1OW-01A-21R-A144-07	TCGA-EW-A1OW-01A	TP	Primary solid Tumor	A144	1	1	1	0	1	Yes
728	BRCA	Female	TCGA-D8-A1Y1	TCGA-D8-A1Y1-01A-21R-A14M-07	TCGA-D8-A1Y1-01A	TP	Primary solid Tumor	A14M	1	1	1	0	1	Yes
729	BRCA	Female	TCGA-AC-A6IX	TCGA-AC-A6IX-01A-12R-A32P-07	TCGA-AC-A6IX-01A	TP	Primary solid Tumor	A32P	1	1	1	0	1	Yes
730	BRCA	Female	TCGA-BH-A0HA	TCGA-BH-A0HA-11A-31R-A12P-07	TCGA-BH-A0HA-11A	NT	Solid Tissue Normal	A12P	1	1	1	0	1	Yes
731	BRCA	Female	TCGA-BH-A0BA	TCGA-BH-A0BA-01A-11R-A056-07	TCGA-BH-A0BA-01A	TP	Primary solid Tumor	A056	1	1	1	0	1	Yes
732	BRCA	Female	TCGA-AC-A23H	TCGA-AC-A23H-11A-12R-A157-07	TCGA-AC-A23H-11A	NT	Solid Tissue Normal	A157	1	1	1	0	1	Yes
733	BRCA	Female	TCGA-EW-A1PH	TCGA-EW-A1PH-01A-11R-A14M-07	TCGA-EW-A1PH-01A	TP	Primary solid Tumor	A14M	1	1	1	0	1	Yes
734	BRCA	Female	TCGA-AN-A046	TCGA-AN-A046-01A-21R-A034-07	TCGA-AN-A046-01A	TP	Primary solid Tumor	A034	1	1	1	0	1	Yes
735	BRCA	Female	TCGA-AN-A04A	TCGA-AN-A04A-01A-21R-A034-07	TCGA-AN-A04A-01A	TP	Primary solid Tumor	A034	1	1	1	0	1	Yes
736	BRCA	Female	TCGA-A2-A0SW	TCGA-A2-A0SW-01A-11R-A084-07	TCGA-A2-A0SW-01A	TP	Primary solid Tumor	A084	1	1	1	0	1	Yes
737	BRCA	Female	TCGA-A2-A0SX	TCGA-A2-A0SX-01A-12R-A084-07	TCGA-A2-A0SX-01A	TP	Primary solid Tumor	A084	1	1	1	0	1	Yes
738	BRCA	Female	TCGA-D8-A27L	TCGA-D8-A27L-01A-11R-A16F-07	TCGA-D8-A27L-01A	TP	Primary solid Tumor	A16F	1	1	1	0	1	Yes
739	BRCA	Female	TCGA-D8-A27M	TCGA-D8-A27M-01A-11R-A16F-07	TCGA-D8-A27M-01A	TP	Primary solid Tumor	A16F	1	1	1	0	1	Yes
740	BRCA	Female	TCGA-E9-A1RB	TCGA-E9-A1RB-01A-11R-A157-07	TCGA-E9-A1RB-01A	TP	Primary solid Tumor	A157	1	1	1	0	1	Yes
741	BRCA	Female	TCGA-A2-A0T1	TCGA-A2-A0T1-01A-21R-A084-07	TCGA-A2-A0T1-01A	TP	Primary solid Tumor	A084	1	1	1	0	1	Yes
742	BRCA	Female	TCGA-A8-A0A1	TCGA-A8-A0A1-01A-11R-A00Z-07	TCGA-A8-A0A1-01A	TP	Primary solid Tumor	A00Z	1	1	1	0	1	Yes
743	BRCA	Female	TCGA-AN-A0AR	TCGA-AN-A0AR-01A-11R-A00Z-07	TCGA-AN-A0AR-01A	TP	Primary solid Tumor	A00Z	1	1	1	0	1	Yes
744	BRCA	Female	TCGA-E2-A1LS	TCGA-E2-A1LS-11A-32R-A157-07	TCGA-E2-A1LS-11A	NT	Solid Tissue Normal	A157	1	1	1	0	1	Yes
745	BRCA	Female	TCGA-BH-A1ET	TCGA-BH-A1ET-01A-11R-A137-07	TCGA-BH-A1ET-01A	TP	Primary solid Tumor	A137	1	1	1	0	1	Yes
746	BRCA	Female	TCGA-LL-A6FQ	TCGA-LL-A6FQ-01A-11R-A31O-07	TCGA-LL-A6FQ-01A	TP	Primary solid Tumor	A31O	1	1	1	0	1	Yes
747	BRCA	Female	TCGA-A8-A0AB	TCGA-A8-A0AB-01A-11R-A034-07	TCGA-A8-A0AB-01A	TP	Primary solid Tumor	A034	1	1	1	0	1	Yes
748	BRCA	Female	TCGA-A2-A4RW	TCGA-A2-A4RW-01A-21R-A266-07	TCGA-A2-A4RW-01A	TP	Primary solid Tumor	A266	1	1	1	0	1	Yes
749	BRCA	Female	TCGA-A2-A4RX	TCGA-A2-A4RX-01A-11R-A266-07	TCGA-A2-A4RX-01A	TP	Primary solid Tumor	A266	1	1	1	0	1	Yes
750	BRCA	Female	TCGA-A2-A4RY	TCGA-A2-A4RY-01A-31R-A266-07	TCGA-A2-A4RY-01A	TP	Primary solid Tumor	A266	1	1	1	0	1	Yes
751	BRCA	Female	TCGA-A2-A4S0	TCGA-A2-A4S0-01A-21R-A266-07	TCGA-A2-A4S0-01A	TP	Primary solid Tumor	A266	1	1	1	0	1	Yes
752	BRCA	Female	TCGA-A2-A4S1	TCGA-A2-A4S1-01A-21R-A266-07	TCGA-A2-A4S1-01A	TP	Primary solid Tumor	A266	1	1	1	0	1	Yes
753	BRCA	Female	TCGA-BH-A1EX	TCGA-BH-A1EX-01A-11R-A13Q-07	TCGA-BH-A1EX-01A	TP	Primary solid Tumor	A13Q	1	1	1	0	1	Yes
754	BRCA	Female	TCGA-AC-A3QP	TCGA-AC-A3QP-01A-11R-A22U-07	TCGA-AC-A3QP-01A	TP	Primary solid Tumor	A22U	1	1	1	0	1	Yes
755	BRCA	Female	TCGA-BH-A1F0	TCGA-BH-A1F0-01A-11R-A137-07	TCGA-BH-A1F0-01A	TP	Primary solid Tumor	A137	1	1	1	0	1	Yes
756	BRCA	Female	TCGA-BH-A18I	TCGA-BH-A18I-01A-11R-A12D-07	TCGA-BH-A18I-01A	TP	Primary solid Tumor	A12D	1	1	1	0	1	Yes
757	BRCA	Female	TCGA-BH-A18J	TCGA-BH-A18J-11A-31R-A12D-07	TCGA-BH-A18J-11A	NT	Solid Tissue Normal	A12D	1	1	1	0	1	Yes
758	BRCA	Female	TCGA-AO-A125	TCGA-AO-A125-01A-11R-A10J-07	TCGA-AO-A125-01A	TP	Primary solid Tumor	A10J	1	1	1	0	1	Yes
759	BRCA	Female	TCGA-3C-AALK	TCGA-3C-AALK-01A-11R-A41B-07	TCGA-3C-AALK-01A	TP	Primary solid Tumor	A41B	1	1	1	0	1	Yes
760	BRCA	Female	TCGA-AC-A4ZE	TCGA-AC-A4ZE-01A-11R-A41B-07	TCGA-AC-A4ZE-01A	TP	Primary solid Tumor	A41B	1	1	1	0	1	Yes
761	BRCA	Female	TCGA-AC-A5EH	TCGA-AC-A5EH-01A-11R-A28M-07	TCGA-AC-A5EH-01A	TP	Primary solid Tumor	A28M	1	1	1	0	1	Yes
762	BRCA	Female	TCGA-A8-A099	TCGA-A8-A099-01A-11R-A00Z-07	TCGA-A8-A099-01A	TP	Primary solid Tumor	A00Z	1	1	1	0	1	Yes
763	BRCA	Female	TCGA-D8-A1XT	TCGA-D8-A1XT-01A-11R-A14M-07	TCGA-D8-A1XT-01A	TP	Primary solid Tumor	A14M	1	1	1	0	1	Yes
764	BRCA	Female	TCGA-BH-A0DD	TCGA-BH-A0DD-01A-31R-A12P-07	TCGA-BH-A0DD-01A	TP	Primary solid Tumor	A12P	1	1	1	0	1	Yes
765	BRCA	Female	TCGA-AC-A5XU	TCGA-AC-A5XU-01A-11R-A28M-07	TCGA-AC-A5XU-01A	TP	Primary solid Tumor	A28M	1	1	1	0	1	Yes
766	BRCA	Female	TCGA-AC-A62V	TCGA-AC-A62V-01A-11R-A31O-07	TCGA-AC-A62V-01A	TP	Primary solid Tumor	A31O	1	1	1	0	1	Yes
767	BRCA	Female	TCGA-BH-A1FC	TCGA-BH-A1FC-01A-11R-A13Q-07	TCGA-BH-A1FC-01A	TP	Primary solid Tumor	A13Q	1	1	1	0	1	Yes
768	BRCA	Female	TCGA-E9-A1RB	TCGA-E9-A1RB-11A-33R-A157-07	TCGA-E9-A1RB-11A	NT	Solid Tissue Normal	A157	1	1	1	0	1	Yes
769	BRCA	Female	TCGA-E9-A1RC	TCGA-E9-A1RC-11A-33R-A157-07	TCGA-E9-A1RC-11A	NT	Solid Tissue Normal	A157	1	1	1	0	1	Yes
770	BRCA	Female	TCGA-AC-A6IW	TCGA-AC-A6IW-01A-12R-A33J-07	TCGA-AC-A6IW-01A	TP	Primary solid Tumor	A33J	1	1	1	0	1	Yes
771	BRCA	Female	TCGA-AR-A1AL	TCGA-AR-A1AL-01A-21R-A12P-07	TCGA-AR-A1AL-01A	TP	Primary solid Tumor	A12P	1	1	1	0	1	Yes
772	BRCA	Female	TCGA-BH-A1FG	TCGA-BH-A1FG-11B-12R-A13Q-07	TCGA-BH-A1FG-11B	NT	Solid Tissue Normal	A13Q	1	1	1	0	1	Yes
773	BRCA	Female	TCGA-AR-A1AN	TCGA-AR-A1AN-01A-11R-A12P-07	TCGA-AR-A1AN-01A	TP	Primary solid Tumor	A12P	1	1	1	0	1	Yes
774	BRCA	Female	TCGA-AR-A1AO	TCGA-AR-A1AO-01A-11R-A12P-07	TCGA-AR-A1AO-01A	TP	Primary solid Tumor	A12P	1	1	1	0	1	Yes
775	BRCA	Female	TCGA-AR-A1AP	TCGA-AR-A1AP-01A-11R-A12P-07	TCGA-AR-A1AP-01A	TP	Primary solid Tumor	A12P	1	1	1	0	1	Yes
776	BRCA	Female	TCGA-AR-A1AQ	TCGA-AR-A1AQ-01A-11R-A12P-07	TCGA-AR-A1AQ-01A	TP	Primary solid Tumor	A12P	1	1	1	0	1	Yes
777	BRCA	Female	TCGA-AR-A1AR	TCGA-AR-A1AR-01A-31R-A137-07	TCGA-AR-A1AR-01A	TP	Primary solid Tumor	A137	1	1	1	0	1	Yes
778	BRCA	Female	TCGA-BH-A0HL	TCGA-BH-A0HL-01A-11R-A10U-07	TCGA-BH-A0HL-01A	TP	Primary solid Tumor	A10U	1	1	1	0	1	Yes
779	BRCA	Female	TCGA-A2-A0T0	TCGA-A2-A0T0-01A-22R-A084-07	TCGA-A2-A0T0-01A	TP	Primary solid Tumor	A084	1	1	1	0	1	Yes
780	BRCA	Female	TCGA-D8-A27N	TCGA-D8-A27N-01A-11R-A16F-07	TCGA-D8-A27N-01A	TP	Primary solid Tumor	A16F	1	1	1	0	1	Yes
781	BRCA	Female	TCGA-AN-A0AL	TCGA-AN-A0AL-01A-11R-A00Z-07	TCGA-AN-A0AL-01A	TP	Primary solid Tumor	A00Z	1	1	1	0	1	Yes
782	BRCA	Female	TCGA-E2-A15K	TCGA-E2-A15K-01A-11R-A12P-07	TCGA-E2-A15K-01A	TP	Primary solid Tumor	A12P	1	1	1	0	1	Yes
783	BRCA	Female	TCGA-BH-A0DT	TCGA-BH-A0DT-11A-12R-A12D-07	TCGA-BH-A0DT-11A	NT	Solid Tissue Normal	A12D	1	1	1	0	1	Yes
784	BRCA	Female	TCGA-AN-A0AS	TCGA-AN-A0AS-01A-11R-A00Z-07	TCGA-AN-A0AS-01A	TP	Primary solid Tumor	A00Z	1	1	1	0	1	Yes
785	BRCA	Female	TCGA-D8-A27W	TCGA-D8-A27W-01A-11R-A16F-07	TCGA-D8-A27W-01A	TP	Primary solid Tumor	A16F	1	1	1	0	1	Yes
786	BRCA	Female	TCGA-AC-A2QH	TCGA-AC-A2QH-01B-04R-A22O-07	TCGA-AC-A2QH-01B	TP	Primary solid Tumor	A22O	0	1	0	0	1	No
787	BRCA	Female	TCGA-C8-A275	TCGA-C8-A275-01A-21R-A16F-07	TCGA-C8-A275-01A	TP	Primary solid Tumor	A16F	1	1	1	0	1	Yes
788	BRCA	Female	TCGA-D8-A4Z1	TCGA-D8-A4Z1-01A-21R-A266-07	TCGA-D8-A4Z1-01A	TP	Primary solid Tumor	A266	1	1	1	0	1	Yes
789	BRCA	Female	TCGA-D8-A73U	TCGA-D8-A73U-01A-11R-A33J-07	TCGA-D8-A73U-01A	TP	Primary solid Tumor	A33J	1	1	1	0	1	Yes
790	BRCA	Female	TCGA-BH-A203	TCGA-BH-A203-11A-42R-A169-07	TCGA-BH-A203-11A	NT	Solid Tissue Normal	A169	1	1	1	0	1	Yes
791	BRCA	Female	TCGA-C8-A3M7	TCGA-C8-A3M7-01A-12R-A21T-07	TCGA-C8-A3M7-01A	TP	Primary solid Tumor	A21T	1	1	1	0	1	Yes
792	BRCA	Female	TCGA-C8-A3M8	TCGA-C8-A3M8-01A-11R-A213-07	TCGA-C8-A3M8-01A	TP	Primary solid Tumor	A213	1	1	1	0	1	Yes
793	BRCA	Female	TCGA-AO-A0JF	TCGA-AO-A0JF-01A-11R-A056-07	TCGA-AO-A0JF-01A	TP	Primary solid Tumor	A056	1	1	1	0	1	Yes
794	BRCA	Female	TCGA-BH-A0E7	TCGA-BH-A0E7-01A-11R-A034-07	TCGA-BH-A0E7-01A	TP	Primary solid Tumor	A034	1	1	1	0	1	Yes
795	BRCA	Female	TCGA-BH-A0E9	TCGA-BH-A0E9-01B-11R-A115-07	TCGA-BH-A0E9-01B	TP	Primary solid Tumor	A115	1	1	1	0	1	Yes
796	BRCA	Female	TCGA-A2-A0D0	TCGA-A2-A0D0-01A-11R-A00Z-07	TCGA-A2-A0D0-01A	TP	Primary solid Tumor	A00Z	1	1	1	0	1	Yes
797	BRCA	Female	TCGA-AR-A24W	TCGA-AR-A24W-01A-11R-A169-07	TCGA-AR-A24W-01A	TP	Primary solid Tumor	A169	1	1	1	0	1	Yes
798	BRCA	Female	TCGA-EW-A1P0	TCGA-EW-A1P0-01A-11R-A144-07	TCGA-EW-A1P0-01A	TP	Primary solid Tumor	A144	1	1	1	0	1	Yes
799	BRCA	Female	TCGA-D8-A140	TCGA-D8-A140-01A-11R-A115-07	TCGA-D8-A140-01A	TP	Primary solid Tumor	A115	1	1	1	0	1	Yes
800	BRCA	Female	TCGA-AR-A24Z	TCGA-AR-A24Z-01A-11R-A169-07	TCGA-AR-A24Z-01A	TP	Primary solid Tumor	A169	1	1	1	0	1	Yes
801	BRCA	Female	TCGA-GM-A2D9	TCGA-GM-A2D9-01A-11R-A18M-07	TCGA-GM-A2D9-01A	TP	Primary solid Tumor	A18M	1	1	1	0	1	Yes
802	BRCA	Female	TCGA-GM-A2DA	TCGA-GM-A2DA-01A-11R-A18M-07	TCGA-GM-A2DA-01A	TP	Primary solid Tumor	A18M	1	1	1	0	1	Yes
803	BRCA	Female	TCGA-E2-A1IG	TCGA-E2-A1IG-01A-11R-A144-07	TCGA-E2-A1IG-01A	TP	Primary solid Tumor	A144	1	1	1	0	1	Yes
804	BRCA	Female	TCGA-BH-A2L8	TCGA-BH-A2L8-01A-11R-A18M-07	TCGA-BH-A2L8-01A	TP	Primary solid Tumor	A18M	1	1	1	0	1	Yes
805	BRCA	Female	TCGA-AR-A254	TCGA-AR-A254-01A-21R-A169-07	TCGA-AR-A254-01A	TP	Primary solid Tumor	A169	1	1	1	0	1	Yes
806	BRCA	Female	TCGA-BH-A42U	TCGA-BH-A42U-01A-12R-A24H-07	TCGA-BH-A42U-01A	TP	Primary solid Tumor	A24H	1	1	1	0	1	Yes
807	BRCA	Female	TCGA-E9-A1R7	TCGA-E9-A1R7-11A-42R-A14M-07	TCGA-E9-A1R7-11A	NT	Solid Tissue Normal	A14M	1	1	1	0	1	Yes
808	BRCA	Female	TCGA-AR-A1AI	TCGA-AR-A1AI-01A-11R-A12P-07	TCGA-AR-A1AI-01A	TP	Primary solid Tumor	A12P	1	1	1	0	1	Yes
809	BRCA	Female	TCGA-AC-A6IV	TCGA-AC-A6IV-01A-12R-A33J-07	TCGA-AC-A6IV-01A	TP	Primary solid Tumor	A33J	1	1	1	0	1	Yes
810	BRCA	Female	TCGA-B6-A0IA	TCGA-B6-A0IA-01A-11R-A034-07	TCGA-B6-A0IA-01A	TP	Primary solid Tumor	A034	1	1	1	0	1	Yes
811	BRCA	Female	TCGA-E9-A1RC	TCGA-E9-A1RC-01A-11R-A157-07	TCGA-E9-A1RC-01A	TP	Primary solid Tumor	A157	1	1	1	0	1	Yes
812	BRCA	Female	TCGA-B6-A0IE	TCGA-B6-A0IE-01A-11R-A034-07	TCGA-B6-A0IE-01A	TP	Primary solid Tumor	A034	1	1	1	0	1	Yes
813	BRCA	Female	TCGA-B6-A0IG	TCGA-B6-A0IG-01A-11R-A034-07	TCGA-B6-A0IG-01A	TP	Primary solid Tumor	A034	1	1	1	0	1	Yes
814	BRCA	Female	TCGA-BH-A0HF	TCGA-BH-A0HF-01A-11R-A056-07	TCGA-BH-A0HF-01A	TP	Primary solid Tumor	A056	1	1	1	0	1	Yes
815	BRCA	Female	TCGA-BH-A0HI	TCGA-BH-A0HI-01A-11R-A084-07	TCGA-BH-A0HI-01A	TP	Primary solid Tumor	A084	1	1	1	0	1	Yes
816	BRCA	Female	TCGA-B6-A0IJ	TCGA-B6-A0IJ-01A-11R-A034-07	TCGA-B6-A0IJ-01A	TP	Primary solid Tumor	A034	1	1	1	0	1	Yes
817	BRCA	Female	TCGA-A2-A0SU	TCGA-A2-A0SU-01A-11R-A084-07	TCGA-A2-A0SU-01A	TP	Primary solid Tumor	A084	1	1	1	0	1	Yes
818	BRCA	Female	TCGA-BH-A0DP	TCGA-BH-A0DP-11A-12R-A089-07	TCGA-BH-A0DP-11A	NT	Solid Tissue Normal	A089	1	1	1	0	1	Yes
819	BRCA	Female	TCGA-BH-A0DP	TCGA-BH-A0DP-01A-21R-A056-07	TCGA-BH-A0DP-01A	TP	Primary solid Tumor	A056	1	1	1	0	1	Yes
820	BRCA	Female	TCGA-E2-A1LG	TCGA-E2-A1LG-01A-21R-A14M-07	TCGA-E2-A1LG-01A	TP	Primary solid Tumor	A14M	1	1	1	0	1	Yes
821	BRCA	Female	TCGA-BH-A0DQ	TCGA-BH-A0DQ-11A-12R-A089-07	TCGA-BH-A0DQ-11A	NT	Solid Tissue Normal	A089	1	1	1	0	1	Yes
822	BRCA	Female	TCGA-B6-A0RE	TCGA-B6-A0RE-01A-11R-A056-07	TCGA-B6-A0RE-01A	TP	Primary solid Tumor	A056	1	1	1	0	1	Yes
823	BRCA	Female	TCGA-B6-A0RG	TCGA-B6-A0RG-01A-11R-A056-07	TCGA-B6-A0RG-01A	TP	Primary solid Tumor	A056	1	1	1	0	1	Yes
824	BRCA	Female	TCGA-B6-A0RH	TCGA-B6-A0RH-01A-21R-A115-07	TCGA-B6-A0RH-01A	TP	Primary solid Tumor	A115	1	1	1	0	1	Yes
825	BRCA	Female	TCGA-E2-A1LI	TCGA-E2-A1LI-01A-12R-A157-07	TCGA-E2-A1LI-01A	TP	Primary solid Tumor	A157	1	1	1	0	1	Yes
826	BRCA	Female	TCGA-E2-A1LS	TCGA-E2-A1LS-01A-12R-A157-07	TCGA-E2-A1LS-01A	TP	Primary solid Tumor	A157	1	1	1	0	1	Yes
827	BRCA	Female	TCGA-EW-A1IY	TCGA-EW-A1IY-01A-11R-A13Q-07	TCGA-EW-A1IY-01A	TP	Primary solid Tumor	A13Q	1	1	1	0	1	Yes
828	BRCA	Female	TCGA-E9-A22D	TCGA-E9-A22D-01A-11R-A157-07	TCGA-E9-A22D-01A	TP	Primary solid Tumor	A157	1	1	1	0	1	Yes
829	BRCA	Female	TCGA-LL-A73Y	TCGA-LL-A73Y-01A-11R-A33J-07	TCGA-LL-A73Y-01A	TP	Primary solid Tumor	A33J	1	1	1	0	1	Yes
830	BRCA	Female	TCGA-E2-A3DX	TCGA-E2-A3DX-01A-21R-A213-07	TCGA-E2-A3DX-01A	TP	Primary solid Tumor	A213	1	1	1	0	1	Yes
831	BRCA	Female	TCGA-E2-A56Z	TCGA-E2-A56Z-01A-12R-A29R-07	TCGA-E2-A56Z-01A	TP	Primary solid Tumor	A29R	1	1	1	0	1	Yes
832	BRCA	Female	TCGA-E2-A570	TCGA-E2-A570-01A-11R-A29R-07	TCGA-E2-A570-01A	TP	Primary solid Tumor	A29R	1	1	1	0	1	Yes
833	BRCA	Female	TCGA-E2-A572	TCGA-E2-A572-01A-13R-A31O-07	TCGA-E2-A572-01A	TP	Primary solid Tumor	A31O	1	1	1	0	1	Yes
834	BRCA	Female	TCGA-EW-A1OV	TCGA-EW-A1OV-01A-11R-A144-07	TCGA-EW-A1OV-01A	TP	Primary solid Tumor	A144	1	1	1	0	1	Yes
835	BRCA	Female	TCGA-BH-A18G	TCGA-BH-A18G-01A-11R-A12D-07	TCGA-BH-A18G-01A	TP	Primary solid Tumor	A12D	1	1	1	0	1	Yes
836	BRCA	Female	TCGA-LL-A8F5	TCGA-LL-A8F5-01A-11R-A36F-07	TCGA-LL-A8F5-01A	TP	Primary solid Tumor	A36F	1	1	1	0	1	Yes
837	BRCA	Female	TCGA-A8-A08R	TCGA-A8-A08R-01A-11R-A034-07	TCGA-A8-A08R-01A	TP	Primary solid Tumor	A034	1	1	1	0	1	Yes
838	BRCA	Female	TCGA-BH-A209	TCGA-BH-A209-01A-11R-A157-07	TCGA-BH-A209-01A	TP	Primary solid Tumor	A157	1	1	1	0	1	Yes
839	BRCA	Female	TCGA-LD-A74U	TCGA-LD-A74U-01A-13R-A33J-07	TCGA-LD-A74U-01A	TP	Primary solid Tumor	A33J	1	1	1	0	1	Yes
840	BRCA	Female	TCGA-D8-A13Z	TCGA-D8-A13Z-01A-11R-A115-07	TCGA-D8-A13Z-01A	TP	Primary solid Tumor	A115	1	1	1	0	1	Yes
841	BRCA	Female	TCGA-E9-A24A	TCGA-E9-A24A-01A-11R-A169-07	TCGA-E9-A24A-01A	TP	Primary solid Tumor	A169	1	1	1	0	1	Yes
842	BRCA	Female	TCGA-D8-A141	TCGA-D8-A141-01A-11R-A115-07	TCGA-D8-A141-01A	TP	Primary solid Tumor	A115	1	1	1	0	1	Yes
843	BRCA	Female	TCGA-A8-A096	TCGA-A8-A096-01A-11R-A00Z-07	TCGA-A8-A096-01A	TP	Primary solid Tumor	A00Z	1	1	1	0	1	Yes
844	BRCA	Female	TCGA-EW-A1P6	TCGA-EW-A1P6-01A-11R-A144-07	TCGA-EW-A1P6-01A	TP	Primary solid Tumor	A144	1	1	1	0	1	Yes
845	BRCA	Female	TCGA-EW-A1P7	TCGA-EW-A1P7-01A-21R-A144-07	TCGA-EW-A1P7-01A	TP	Primary solid Tumor	A144	1	1	1	0	1	Yes
846	BRCA	Female	TCGA-E9-A54Y	TCGA-E9-A54Y-01A-11R-A466-07	TCGA-E9-A54Y-01A	TP	Primary solid Tumor	A466	1	1	1	0	1	Yes
847	BRCA	Female	TCGA-A8-A09B	TCGA-A8-A09B-01A-11R-A00Z-07	TCGA-A8-A09B-01A	TP	Primary solid Tumor	A00Z	1	1	1	0	1	Yes
848	BRCA	Female	TCGA-E9-A1R7	TCGA-E9-A1R7-01A-11R-A14M-07	TCGA-E9-A1R7-01A	TP	Primary solid Tumor	A14M	1	1	1	0	1	Yes
849	BRCA	Female	TCGA-BH-A0H9	TCGA-BH-A0H9-01A-11R-A056-07	TCGA-BH-A0H9-01A	TP	Primary solid Tumor	A056	1	1	1	0	1	Yes
850	BRCA	Female	TCGA-A8-A09G	TCGA-A8-A09G-01A-21R-A00Z-07	TCGA-A8-A09G-01A	TP	Primary solid Tumor	A00Z	1	1	1	0	1	Yes
851	BRCA	Female	TCGA-A8-A09I	TCGA-A8-A09I-01A-22R-A034-07	TCGA-A8-A09I-01A	TP	Primary solid Tumor	A034	1	1	1	0	1	Yes
852	BRCA	Female	TCGA-EW-A1PF	TCGA-EW-A1PF-01A-11R-A144-07	TCGA-EW-A1PF-01A	TP	Primary solid Tumor	A144	1	1	1	0	1	Yes
853	BRCA	Female	TCGA-EW-A1PG	TCGA-EW-A1PG-01A-11R-A144-07	TCGA-EW-A1PG-01A	TP	Primary solid Tumor	A144	1	1	1	0	1	Yes
854	BRCA	Female	TCGA-B6-A401	TCGA-B6-A401-01A-11R-A239-07	TCGA-B6-A401-01A	TP	Primary solid Tumor	A239	1	1	1	0	1	Yes
855	BRCA	Female	TCGA-AC-A23H	TCGA-AC-A23H-01A-11R-A157-07	TCGA-AC-A23H-01A	TP	Primary solid Tumor	A157	1	1	1	0	1	Yes
856	BRCA	Female	TCGA-AN-A049	TCGA-AN-A049-01A-21R-A00Z-07	TCGA-AN-A049-01A	TP	Primary solid Tumor	A00Z	1	1	1	0	1	Yes
857	BRCA	Female	TCGA-A7-A0D9	TCGA-A7-A0D9-11A-53R-A089-07	TCGA-A7-A0D9-11A	NT	Solid Tissue Normal	A089	1	1	1	0	1	Yes
858	BRCA	Female	TCGA-AO-A1KR	TCGA-AO-A1KR-01A-12R-A144-07	TCGA-AO-A1KR-01A	TP	Primary solid Tumor	A144	1	1	1	0	1	Yes
859	BRCA	Female	TCGA-AO-A1KS	TCGA-AO-A1KS-01A-11R-A13Q-07	TCGA-AO-A1KS-01A	TP	Primary solid Tumor	A13Q	1	1	1	0	1	Yes
860	BRCA	Female	TCGA-AC-A8OS	TCGA-AC-A8OS-01A-12R-A41B-07	TCGA-AC-A8OS-01A	TP	Primary solid Tumor	A41B	1	1	1	0	1	Yes
861	BRCA	Female	TCGA-A2-A0SY	TCGA-A2-A0SY-01A-31R-A084-07	TCGA-A2-A0SY-01A	TP	Primary solid Tumor	A084	1	1	1	0	1	Yes
862	BRCA	Female	TCGA-A8-A09X	TCGA-A8-A09X-01A-11R-A00Z-07	TCGA-A8-A09X-01A	TP	Primary solid Tumor	A00Z	1	1	1	0	1	Yes
863	BRCA	Female	TCGA-AN-A0AM	TCGA-AN-A0AM-01A-11R-A034-07	TCGA-AN-A0AM-01A	TP	Primary solid Tumor	A034	1	1	1	0	1	Yes
864	BRCA	Female	TCGA-A2-A3XW	TCGA-A2-A3XW-01A-11R-A239-07	TCGA-A2-A3XW-01A	TP	Primary solid Tumor	A239	1	1	1	0	1	Yes
865	BRCA	Female	TCGA-A2-A3XX	TCGA-A2-A3XX-01A-21R-A239-07	TCGA-A2-A3XX-01A	TP	Primary solid Tumor	A239	1	1	1	0	1	Yes
866	BRCA	Female	TCGA-A2-A3XY	TCGA-A2-A3XY-01A-11R-A239-07	TCGA-A2-A3XY-01A	TP	Primary solid Tumor	A239	1	1	1	0	1	Yes
867	BRCA	Female	TCGA-A2-A3XZ	TCGA-A2-A3XZ-01A-42R-A239-07	TCGA-A2-A3XZ-01A	TP	Primary solid Tumor	A239	1	1	1	0	1	Yes
868	BRCA	Female	TCGA-AC-A2QI	TCGA-AC-A2QI-01A-12R-A19W-07	TCGA-AC-A2QI-01A	TP	Primary solid Tumor	A19W	1	1	1	0	1	Yes
869	BRCA	Female	TCGA-BH-A1EU	TCGA-BH-A1EU-11A-23R-A137-07	TCGA-BH-A1EU-11A	NT	Solid Tissue Normal	A137	1	1	1	0	1	Yes
870	BRCA	Female	TCGA-BH-A1EU	TCGA-BH-A1EU-01A-11R-A137-07	TCGA-BH-A1EU-01A	TP	Primary solid Tumor	A137	1	1	1	0	1	Yes
871	BRCA	Female	TCGA-BH-A1EV	TCGA-BH-A1EV-11A-24R-A137-07	TCGA-BH-A1EV-11A	NT	Solid Tissue Normal	A137	1	1	1	0	1	Yes
872	BRCA	Female	TCGA-BH-A1EV	TCGA-BH-A1EV-01A-11R-A137-07	TCGA-BH-A1EV-01A	TP	Primary solid Tumor	A137	1	1	1	0	1	Yes
873	BRCA	Female	TCGA-BH-A1EW	TCGA-BH-A1EW-01A-11R-A137-07	TCGA-BH-A1EW-01A	TP	Primary solid Tumor	A137	1	1	1	0	1	Yes
874	BRCA	Female	TCGA-A2-A4S2	TCGA-A2-A4S2-01A-12R-A266-07	TCGA-A2-A4S2-01A	TP	Primary solid Tumor	A266	1	1	1	0	1	Yes
875	BRCA	Female	TCGA-E2-A14T	TCGA-E2-A14T-01A-11R-A115-07	TCGA-E2-A14T-01A	TP	Primary solid Tumor	A115	1	1	1	0	1	Yes
876	BRCA	Female	TCGA-AC-A3QQ	TCGA-AC-A3QQ-01B-06R-A22O-07	TCGA-AC-A3QQ-01B	TP	Primary solid Tumor	A22O	0	1	0	0	1	No
877	BRCA	Female	TCGA-BH-A1F0	TCGA-BH-A1F0-11B-23R-A137-07	TCGA-BH-A1F0-11B	NT	Solid Tissue Normal	A137	1	1	1	0	1	Yes
878	BRCA	Female	TCGA-A8-A08S	TCGA-A8-A08S-01A-11R-A034-07	TCGA-A8-A08S-01A	TP	Primary solid Tumor	A034	1	1	1	0	1	Yes
879	BRCA	Female	TCGA-BH-A18J	TCGA-BH-A18J-01A-11R-A12D-07	TCGA-BH-A18J-01A	TP	Primary solid Tumor	A12D	1	1	1	0	1	Yes
880	BRCA	Female	TCGA-AC-A3YJ	TCGA-AC-A3YJ-01A-11R-A22U-07	TCGA-AC-A3YJ-01A	TP	Primary solid Tumor	A22U	1	1	1	0	1	Yes
881	BRCA	Female	TCGA-D8-A1XQ	TCGA-D8-A1XQ-01A-11R-A14M-07	TCGA-D8-A1XQ-01A	TP	Primary solid Tumor	A14M	1	1	1	0	1	Yes
882	BRCA	Female	TCGA-D8-A1XR	TCGA-D8-A1XR-01A-11R-A14M-07	TCGA-D8-A1XR-01A	TP	Primary solid Tumor	A14M	1	1	1	0	1	Yes
883	BRCA	Female	TCGA-AC-A5XS	TCGA-AC-A5XS-01A-11R-A29R-07	TCGA-AC-A5XS-01A	TP	Primary solid Tumor	A29R	1	1	1	0	1	Yes
884	BRCA	Female	TCGA-A1-A0SH	TCGA-A1-A0SH-01A-11R-A084-07	TCGA-A1-A0SH-01A	TP	Primary solid Tumor	A084	1	1	1	0	1	Yes
885	BRCA	Female	TCGA-A1-A0SI	TCGA-A1-A0SI-01A-11R-A144-07	TCGA-A1-A0SI-01A	TP	Primary solid Tumor	A144	1	1	1	0	1	Yes
886	BRCA	Female	TCGA-A1-A0SJ	TCGA-A1-A0SJ-01A-11R-A084-07	TCGA-A1-A0SJ-01A	TP	Primary solid Tumor	A084	1	1	1	0	1	Yes
887	BRCA	Female	TCGA-BH-A1FC	TCGA-BH-A1FC-11A-32R-A13Q-07	TCGA-BH-A1FC-11A	NT	Solid Tissue Normal	A13Q	1	1	1	0	1	Yes
888	BRCA	Female	TCGA-AR-A1AH	TCGA-AR-A1AH-01A-11R-A12D-07	TCGA-AR-A1AH-01A	TP	Primary solid Tumor	A12D	1	1	1	0	1	Yes
889	BRCA	Female	TCGA-4H-AAAK	TCGA-4H-AAAK-01A-12R-A41B-07	TCGA-4H-AAAK-01A	TP	Primary solid Tumor	A41B	1	1	1	0	1	Yes
890	BRCA	Female	TCGA-AR-A1AJ	TCGA-AR-A1AJ-01A-21R-A12P-07	TCGA-AR-A1AJ-01A	TP	Primary solid Tumor	A12P	1	1	1	0	1	Yes
891	BRCA	Female	TCGA-AR-A1AK	TCGA-AR-A1AK-01A-21R-A12P-07	TCGA-AR-A1AK-01A	TP	Primary solid Tumor	A12P	1	1	1	0	1	Yes
892	BRCA	Female	TCGA-BH-A1FE	TCGA-BH-A1FE-01A-11R-A13Q-07	TCGA-BH-A1FE-01A	TP	Primary solid Tumor	A13Q	1	1	1	0	1	Yes
893	BRCA	Female	TCGA-AR-A1AM	TCGA-AR-A1AM-01A-41R-A22K-07	TCGA-AR-A1AM-01A	TP	Primary solid Tumor	A22K	1	1	1	0	1	Yes
894	BRCA	Female	TCGA-E2-A15C	TCGA-E2-A15C-01A-31R-A12D-07	TCGA-E2-A15C-01A	TP	Primary solid Tumor	A12D	1	1	1	0	1	Yes
895	BRCA	Female	TCGA-E2-A15D	TCGA-E2-A15D-01A-11R-A115-07	TCGA-E2-A15D-01A	TP	Primary solid Tumor	A115	1	1	1	0	1	Yes
896	BRCA	Female	TCGA-E2-A15E	TCGA-E2-A15E-01A-11R-A12D-07	TCGA-E2-A15E-01A	TP	Primary solid Tumor	A12D	1	1	1	0	1	Yes
897	BRCA	Female	TCGA-A2-A04Q	TCGA-A2-A04Q-01A-21R-A034-07	TCGA-A2-A04Q-01A	TP	Primary solid Tumor	A034	1	1	1	0	1	Yes
898	BRCA	Female	TCGA-AO-A03P	TCGA-AO-A03P-01A-11R-A00Z-07	TCGA-AO-A03P-01A	TP	Primary solid Tumor	A00Z	1	1	1	0	1	Yes
899	BRCA	Female	TCGA-E2-A15G	TCGA-E2-A15G-01A-11R-A12D-07	TCGA-E2-A15G-01A	TP	Primary solid Tumor	A12D	1	1	1	0	1	Yes
900	BRCA	Female	TCGA-E2-A1LE	TCGA-E2-A1LE-01A-12R-A19W-07	TCGA-E2-A1LE-01A	TP	Primary solid Tumor	A19W	1	1	1	0	1	Yes
901	BRCA	Female	TCGA-C8-A1HM	TCGA-C8-A1HM-01A-12R-A137-07	TCGA-C8-A1HM-01A	TP	Primary solid Tumor	A137	1	1	1	0	1	Yes
902	BRCA	Female	TCGA-C8-A1HN	TCGA-C8-A1HN-01A-11R-A137-07	TCGA-C8-A1HN-01A	TP	Primary solid Tumor	A137	1	1	1	0	1	Yes
903	BRCA	Female	TCGA-BH-A0DS	TCGA-BH-A0DS-01A-11R-A056-07	TCGA-BH-A0DS-01A	TP	Primary solid Tumor	A056	1	1	1	0	1	Yes
904	BRCA	Female	TCGA-E2-A15K	TCGA-E2-A15K-11A-13R-A12P-07	TCGA-E2-A15K-11A	NT	Solid Tissue Normal	A12P	1	1	1	0	1	Yes
905	BRCA	Female	TCGA-BH-A0DT	TCGA-BH-A0DT-01A-21R-A12D-07	TCGA-BH-A0DT-01A	TP	Primary solid Tumor	A12D	1	1	1	0	1	Yes
906	BRCA	Female	TCGA-D8-A27T	TCGA-D8-A27T-01A-11R-A16F-07	TCGA-D8-A27T-01A	TP	Primary solid Tumor	A16F	1	1	1	0	1	Yes
907	BRCA	Female	TCGA-D8-A3Z5	TCGA-D8-A3Z5-01A-41R-A24H-07	TCGA-D8-A3Z5-01A	TP	Primary solid Tumor	A24H	1	1	1	0	1	Yes
908	BRCA	Female	TCGA-BH-A1FR	TCGA-BH-A1FR-11B-42R-A13Q-07	TCGA-BH-A1FR-11B	NT	Solid Tissue Normal	A13Q	1	1	1	0	1	Yes
909	BRCA	Female	TCGA-C8-A278	TCGA-C8-A278-01A-11R-A169-07	TCGA-C8-A278-01A	TP	Primary solid Tumor	A169	1	1	1	0	1	Yes
910	BRCA	Female	TCGA-C8-A27A	TCGA-C8-A27A-01A-11R-A169-07	TCGA-C8-A27A-01A	TP	Primary solid Tumor	A169	1	1	1	0	1	Yes
911	BRCA	Female	TCGA-C8-A27B	TCGA-C8-A27B-01A-11R-A169-07	TCGA-C8-A27B-01A	TP	Primary solid Tumor	A169	1	1	1	0	1	Yes
912	BRCA	Female	TCGA-HN-A2NL	TCGA-HN-A2NL-01A-11R-A18M-07	TCGA-HN-A2NL-01A	TP	Primary solid Tumor	A18M	1	1	1	0	1	Yes
913	BRCA	Female	TCGA-HN-A2OB	TCGA-HN-A2OB-01A-21R-A27Q-07	TCGA-HN-A2OB-01A	TP	Primary solid Tumor	A27Q	1	1	1	0	1	Yes
914	BRCA	Female	TCGA-D8-A73X	TCGA-D8-A73X-01A-11R-A32P-07	TCGA-D8-A73X-01A	TP	Primary solid Tumor	A32P	1	1	1	0	1	Yes
915	BRCA	Female	TCGA-C8-A8HP	TCGA-C8-A8HP-01A-11R-A36F-07	TCGA-C8-A8HP-01A	TP	Primary solid Tumor	A36F	1	1	1	0	1	Yes
916	BRCA	Female	TCGA-AR-A24T	TCGA-AR-A24T-01A-11R-A169-07	TCGA-AR-A24T-01A	TP	Primary solid Tumor	A169	1	1	1	0	1	Yes
917	BRCA	Female	TCGA-AR-A24U	TCGA-AR-A24U-01A-11R-A169-07	TCGA-AR-A24U-01A	TP	Primary solid Tumor	A169	1	1	1	0	1	Yes
918	BRCA	Female	TCGA-AO-A0JM	TCGA-AO-A0JM-01A-21R-A056-07	TCGA-AO-A0JM-01A	TP	Primary solid Tumor	A056	1	1	1	0	1	Yes
919	BRCA	Female	TCGA-3C-AAAU	TCGA-3C-AAAU-01A-11R-A41B-07	TCGA-3C-AAAU-01A	TP	Primary solid Tumor	A41B	1	1	1	0	1	Yes
920	BRCA	Female	TCGA-3C-AALI	TCGA-3C-AALI-01A-11R-A41B-07	TCGA-3C-AALI-01A	TP	Primary solid Tumor	A41B	1	1	1	0	1	Yes
921	BRCA	Female	TCGA-E2-A1BC	TCGA-E2-A1BC-01A-11R-A12P-07	TCGA-E2-A1BC-01A	TP	Primary solid Tumor	A12P	1	1	1	0	1	Yes
922	BRCA	Female	TCGA-AO-A0JL	TCGA-AO-A0JL-01A-11R-A056-07	TCGA-AO-A0JL-01A	TP	Primary solid Tumor	A056	1	1	1	0	1	Yes
923	BRCA	Female	TCGA-A8-A06Y	TCGA-A8-A06Y-01A-21R-A00Z-07	TCGA-A8-A06Y-01A	TP	Primary solid Tumor	A00Z	1	1	1	0	1	Yes
924	BRCA	Female	TCGA-E9-A1R3	TCGA-E9-A1R3-01A-31R-A14M-07	TCGA-E9-A1R3-01A	TP	Primary solid Tumor	A14M	1	1	1	0	1	Yes
925	BRCA	Female	TCGA-AO-A126	TCGA-AO-A126-01A-11R-A10J-07	TCGA-AO-A126-01A	TP	Primary solid Tumor	A10J	1	1	1	0	1	Yes
926	BRCA	Female	TCGA-BH-A42T	TCGA-BH-A42T-01A-11R-A24H-07	TCGA-BH-A42T-01A	TP	Primary solid Tumor	A24H	1	1	1	0	1	Yes
927	BRCA	Female	TCGA-E9-A1R6	TCGA-E9-A1R6-01A-11R-A14D-07	TCGA-E9-A1R6-01A	TP	Primary solid Tumor	A14D	1	1	1	0	1	Yes
928	BRCA	Female	TCGA-A8-A07B	TCGA-A8-A07B-01A-11R-A00Z-07	TCGA-A8-A07B-01A	TP	Primary solid Tumor	A00Z	1	1	1	0	1	Yes
929	BRCA	Female	TCGA-A8-A07C	TCGA-A8-A07C-01A-11R-A034-07	TCGA-A8-A07C-01A	TP	Primary solid Tumor	A034	1	1	1	0	1	Yes
930	BRCA	Female	TCGA-BH-A42V	TCGA-BH-A42V-01A-11R-A24H-07	TCGA-BH-A42V-01A	TP	Primary solid Tumor	A24H	1	1	1	0	1	Yes
931	BRCA	Female	TCGA-E2-A1IK	TCGA-E2-A1IK-01A-11R-A144-07	TCGA-E2-A1IK-01A	TP	Primary solid Tumor	A144	1	1	1	0	1	Yes
932	BRCA	Female	TCGA-B6-A0IB	TCGA-B6-A0IB-01A-11R-A034-07	TCGA-B6-A0IB-01A	TP	Primary solid Tumor	A034	1	1	1	0	1	Yes
933	BRCA	Female	TCGA-E2-A1L6	TCGA-E2-A1L6-01A-11R-A13Q-07	TCGA-E2-A1L6-01A	TP	Primary solid Tumor	A13Q	1	1	1	0	1	Yes
934	BRCA	Female	TCGA-E2-A1L7	TCGA-E2-A1L7-01A-11R-A144-07	TCGA-E2-A1L7-01A	TP	Primary solid Tumor	A144	1	1	1	0	1	Yes
935	BRCA	Female	TCGA-E2-A1L7	TCGA-E2-A1L7-11A-33R-A144-07	TCGA-E2-A1L7-11A	NT	Solid Tissue Normal	A144	1	1	1	0	1	Yes
936	BRCA	Female	TCGA-E2-A1L8	TCGA-E2-A1L8-01A-11R-A13Q-07	TCGA-E2-A1L8-01A	TP	Primary solid Tumor	A13Q	1	1	1	0	1	Yes
937	BRCA	Female	TCGA-E2-A1L9	TCGA-E2-A1L9-01A-11R-A13Q-07	TCGA-E2-A1L9-01A	TP	Primary solid Tumor	A13Q	1	1	1	0	1	Yes
938	BRCA	Female	TCGA-AR-A5QM	TCGA-AR-A5QM-01A-11R-A27Q-07	TCGA-AR-A5QM-01A	TP	Primary solid Tumor	A27Q	1	1	1	0	1	Yes
939	BRCA	Female	TCGA-B6-A0IN	TCGA-B6-A0IN-01A-11R-A034-07	TCGA-B6-A0IN-01A	TP	Primary solid Tumor	A034	1	1	1	0	1	Yes
940	BRCA	Female	TCGA-C8-A1HL	TCGA-C8-A1HL-01A-11R-A137-07	TCGA-C8-A1HL-01A	TP	Primary solid Tumor	A137	1	1	1	0	1	Yes
941	BRCA	Female	TCGA-AO-A1KT	TCGA-AO-A1KT-01A-11R-A13Q-07	TCGA-AO-A1KT-01A	TP	Primary solid Tumor	A13Q	1	1	1	0	1	Yes
942	BRCA	Female	TCGA-BH-A0HO	TCGA-BH-A0HO-01A-11R-A034-07	TCGA-BH-A0HO-01A	TP	Primary solid Tumor	A034	1	1	1	0	1	Yes
943	BRCA	Female	TCGA-LL-A5YM	TCGA-LL-A5YM-01A-11R-A28M-07	TCGA-LL-A5YM-01A	TP	Primary solid Tumor	A28M	1	1	1	0	1	Yes
944	BRCA	Female	TCGA-E9-A1RH	TCGA-E9-A1RH-11A-34R-A169-07	TCGA-E9-A1RH-11A	NT	Solid Tissue Normal	A169	1	1	1	0	1	Yes
945	BRCA	Female	TCGA-E2-A1LH	TCGA-E2-A1LH-01A-11R-A14D-07	TCGA-E2-A1LH-01A	TP	Primary solid Tumor	A14D	1	1	1	0	1	Yes
946	BRCA	Female	TCGA-LL-A5YO	TCGA-LL-A5YO-01A-21R-A28M-07	TCGA-LL-A5YO-01A	TP	Primary solid Tumor	A28M	1	1	1	0	1	Yes
947	BRCA	Female	TCGA-E2-A1LK	TCGA-E2-A1LK-01A-21R-A14D-07	TCGA-E2-A1LK-01A	TP	Primary solid Tumor	A14D	1	1	1	0	1	Yes
948	BRCA	Female	TCGA-LL-A6FP	TCGA-LL-A6FP-01A-11R-A31O-07	TCGA-LL-A6FP-01A	TP	Primary solid Tumor	A31O	1	1	1	0	1	Yes
949	BRCA	Female	TCGA-A8-A08C	TCGA-A8-A08C-01A-11R-A00Z-07	TCGA-A8-A08C-01A	TP	Primary solid Tumor	A00Z	1	1	1	0	1	Yes
950	BRCA	Female	TCGA-E9-A22B	TCGA-E9-A22B-01A-11R-A157-07	TCGA-E9-A22B-01A	TP	Primary solid Tumor	A157	1	1	1	0	1	Yes
951	BRCA	Female	TCGA-EW-A1J2	TCGA-EW-A1J2-01A-21R-A13Q-07	TCGA-EW-A1J2-01A	TP	Primary solid Tumor	A13Q	1	1	1	0	1	Yes
952	BRCA	Female	TCGA-EW-A1J3	TCGA-EW-A1J3-01A-11R-A13Q-07	TCGA-EW-A1J3-01A	TP	Primary solid Tumor	A13Q	1	1	1	0	1	Yes
953	BRCA	Female	TCGA-EW-A1J5	TCGA-EW-A1J5-01A-11R-A13Q-07	TCGA-EW-A1J5-01A	TP	Primary solid Tumor	A13Q	1	1	1	0	1	Yes
954	BRCA	Female	TCGA-EW-A1J6	TCGA-EW-A1J6-01A-11R-A13Q-07	TCGA-EW-A1J6-01A	TP	Primary solid Tumor	A13Q	1	1	1	0	1	Yes
955	BRCA	Female	TCGA-B6-A0RV	TCGA-B6-A0RV-01A-11R-A084-07	TCGA-B6-A0RV-01A	TP	Primary solid Tumor	A084	1	1	1	0	1	Yes
956	BRCA	Female	TCGA-E2-A573	TCGA-E2-A573-01A-11R-A29R-07	TCGA-E2-A573-01A	TP	Primary solid Tumor	A29R	1	1	1	0	1	Yes
957	BRCA	Female	TCGA-A8-A08P	TCGA-A8-A08P-01A-11R-A00Z-07	TCGA-A8-A08P-01A	TP	Primary solid Tumor	A00Z	1	1	1	0	1	Yes
958	BRCA	Female	TCGA-E9-A243	TCGA-E9-A243-01A-21R-A169-07	TCGA-E9-A243-01A	TP	Primary solid Tumor	A169	1	1	1	0	1	Yes
959	BRCA	Female	TCGA-E9-A244	TCGA-E9-A244-01A-11R-A169-07	TCGA-E9-A244-01A	TP	Primary solid Tumor	A169	1	1	1	0	1	Yes
960	BRCA	Female	TCGA-A8-A08T	TCGA-A8-A08T-01A-21R-A00Z-07	TCGA-A8-A08T-01A	TP	Primary solid Tumor	A00Z	1	1	1	0	1	Yes
961	BRCA	Female	TCGA-B6-A0WY	TCGA-B6-A0WY-01A-11R-A109-07	TCGA-B6-A0WY-01A	TP	Primary solid Tumor	A109	1	1	1	0	1	Yes
962	BRCA	Female	TCGA-UL-AAZ6	TCGA-UL-AAZ6-01A-11R-A41B-07	TCGA-UL-AAZ6-01A	TP	Primary solid Tumor	A41B	1	1	1	0	1	Yes
963	BRCA	Female	TCGA-B6-A0X0	TCGA-B6-A0X0-01A-21R-A115-07	TCGA-B6-A0X0-01A	TP	Primary solid Tumor	A115	1	1	1	0	1	Yes
964	BRCA	Female	TCGA-BH-A0B4	TCGA-BH-A0B4-01A-11R-A00Z-07	TCGA-BH-A0B4-01A	TP	Primary solid Tumor	A00Z	1	1	1	0	1	Yes
965	BRCA	Female	TCGA-5T-A9QA	TCGA-5T-A9QA-01A-11R-A41B-07	TCGA-5T-A9QA-01A	TP	Primary solid Tumor	A41B	1	1	1	0	1	Yes
966	BRCA	Female	TCGA-V7-A7HQ	TCGA-V7-A7HQ-01A-11R-A33J-07	TCGA-V7-A7HQ-01A	TP	Primary solid Tumor	A33J	1	1	1	0	1	Yes
967	BRCA	Female	TCGA-EW-A1P8	TCGA-EW-A1P8-01A-11R-A144-07	TCGA-EW-A1P8-01A	TP	Primary solid Tumor	A144	1	1	1	0	1	Yes
968	BRCA	Female	TCGA-BH-A0B6	TCGA-BH-A0B6-01A-11R-A19W-07	TCGA-BH-A0B6-01A	TP	Primary solid Tumor	A19W	1	1	1	0	1	Yes
969	BRCA	Female	TCGA-AC-A23G	TCGA-AC-A23G-01A-11R-A213-07	TCGA-AC-A23G-01A	TP	Primary solid Tumor	A213	1	1	1	0	1	Yes
970	BRCA	Female	TCGA-A8-A09E	TCGA-A8-A09E-01A-11R-A00Z-07	TCGA-A8-A09E-01A	TP	Primary solid Tumor	A00Z	1	1	1	0	1	Yes
971	BRCA	Female	TCGA-BH-A0B8	TCGA-BH-A0B8-11A-41R-A089-07	TCGA-BH-A0B8-11A	NT	Solid Tissue Normal	A089	1	1	1	0	1	Yes
972	BRCA	Female	TCGA-BH-A0B9	TCGA-BH-A0B9-01A-11R-A056-07	TCGA-BH-A0B9-01A	TP	Primary solid Tumor	A056	1	1	1	0	1	Yes
973	BRCA	Female	TCGA-B6-A3ZX	TCGA-B6-A3ZX-01A-11R-A239-07	TCGA-B6-A3ZX-01A	TP	Primary solid Tumor	A239	1	1	1	0	1	Yes
974	BRCA	Female	TCGA-AN-A03X	TCGA-AN-A03X-01A-21R-A00Z-07	TCGA-AN-A03X-01A	TP	Primary solid Tumor	A00Z	1	1	1	0	1	Yes
975	BRCA	Female	TCGA-AN-A03Y	TCGA-AN-A03Y-01A-21R-A00Z-07	TCGA-AN-A03Y-01A	TP	Primary solid Tumor	A00Z	1	1	1	0	1	Yes
976	BRCA	Female	TCGA-AN-A041	TCGA-AN-A041-01A-11R-A034-07	TCGA-AN-A041-01A	TP	Primary solid Tumor	A034	1	1	1	0	1	Yes
977	BRCA	Female	TCGA-AC-A2B8	TCGA-AC-A2B8-01A-11R-A17B-07	TCGA-AC-A2B8-01A	TP	Primary solid Tumor	A17B	1	1	1	0	1	Yes
978	BRCA	Female	TCGA-A8-A09Q	TCGA-A8-A09Q-01A-11R-A00Z-07	TCGA-A8-A09Q-01A	TP	Primary solid Tumor	A00Z	1	1	1	0	1	Yes
979	BRCA	Female	TCGA-AN-A04C	TCGA-AN-A04C-01A-21R-A034-07	TCGA-AN-A04C-01A	TP	Primary solid Tumor	A034	1	1	1	0	1	Yes
980	BRCA	Female	TCGA-BH-A0HK	TCGA-BH-A0HK-01A-11R-A056-07	TCGA-BH-A0HK-01A	TP	Primary solid Tumor	A056	1	1	1	0	1	Yes
981	BRCA	Female	TCGA-AN-A0AJ	TCGA-AN-A0AJ-01A-11R-A00Z-07	TCGA-AN-A0AJ-01A	TP	Primary solid Tumor	A00Z	1	1	1	0	1	Yes
982	BRCA	Female	TCGA-AN-A0AK	TCGA-AN-A0AK-01A-21R-A00Z-07	TCGA-AN-A0AK-01A	TP	Primary solid Tumor	A00Z	1	1	1	0	1	Yes
983	BRCA	Female	TCGA-A7-A0DB	TCGA-A7-A0DB-01A-11R-A00Z-07	TCGA-A7-A0DB-01A	TP	Primary solid Tumor	A00Z	1	1	1	0	1	Yes
984	BRCA	Female	TCGA-A7-A0DB	TCGA-A7-A0DB-11A-33R-A089-07	TCGA-A7-A0DB-11A	NT	Solid Tissue Normal	A089	1	1	1	0	1	Yes
985	BRCA	Female	TCGA-A7-A0DB	TCGA-A7-A0DB-01A-11R-A277-07	TCGA-A7-A0DB-01A	TP	Primary solid Tumor	A277	0	1	0	0	1	No
986	BRCA	Female	TCGA-A7-A0DB	TCGA-A7-A0DB-01C-02R-A277-07	TCGA-A7-A0DB-01C	TP	Primary solid Tumor	A277	0	1	0	0	1	No
987	BRCA	Female	TCGA-A7-A0DC	TCGA-A7-A0DC-01A-11R-A00Z-07	TCGA-A7-A0DC-01A	TP	Primary solid Tumor	A00Z	1	1	1	0	1	Yes
988	BRCA	Female	TCGA-BH-A1ES	TCGA-BH-A1ES-01A-11R-A137-07	TCGA-BH-A1ES-01A	TP	Primary solid Tumor	A137	1	1	1	0	1	Yes
989	BRCA	Female	TCGA-A2-A3Y0	TCGA-A2-A3Y0-01A-11R-A239-07	TCGA-A2-A3Y0-01A	TP	Primary solid Tumor	A239	1	1	1	0	1	Yes
990	BRCA	Female	TCGA-AN-A0FD	TCGA-AN-A0FD-01A-11R-A034-07	TCGA-AN-A0FD-01A	TP	Primary solid Tumor	A034	1	1	1	0	1	Yes
991	BRCA	Female	TCGA-AN-A0FF	TCGA-AN-A0FF-01A-11R-A034-07	TCGA-AN-A0FF-01A	TP	Primary solid Tumor	A034	1	1	1	0	1	Yes
992	BRCA	Female	TCGA-AN-A0FJ	TCGA-AN-A0FJ-01A-11R-A00Z-07	TCGA-AN-A0FJ-01A	TP	Primary solid Tumor	A00Z	1	1	1	0	1	Yes
993	BRCA	Female	TCGA-AN-A0FK	TCGA-AN-A0FK-01A-11R-A034-07	TCGA-AN-A0FK-01A	TP	Primary solid Tumor	A034	1	1	1	0	1	Yes
994	BRCA	Female	TCGA-AN-A0FL	TCGA-AN-A0FL-01A-11R-A034-07	TCGA-AN-A0FL-01A	TP	Primary solid Tumor	A034	1	1	1	0	1	Yes
995	BRCA	Female	TCGA-OL-A97C	TCGA-OL-A97C-01A-32R-A41B-07	TCGA-OL-A97C-01A	TP	Primary solid Tumor	A41B	1	1	1	0	1	Yes
996	BRCA	Female	TCGA-AN-A0FS	TCGA-AN-A0FS-01A-11R-A034-07	TCGA-AN-A0FS-01A	TP	Primary solid Tumor	A034	1	1	1	0	1	Yes
997	BRCA	Female	TCGA-E2-A14U	TCGA-E2-A14U-01A-11R-A22K-07	TCGA-E2-A14U-01A	TP	Primary solid Tumor	A22K	1	1	1	0	1	Yes
998	BRCA	Female	TCGA-AC-A3TM	TCGA-AC-A3TM-01A-11R-A22K-07	TCGA-AC-A3TM-01A	TP	Primary solid Tumor	A22K	1	1	1	0	1	Yes
999	BRCA	Female	TCGA-AC-A3W6	TCGA-AC-A3W6-01A-12R-A22K-07	TCGA-AC-A3W6-01A	TP	Primary solid Tumor	A22K	1	1	1	0	1	Yes
1000	BRCA	Female	TCGA-AC-A3W7	TCGA-AC-A3W7-01A-11R-A22K-07	TCGA-AC-A3W7-01A	TP	Primary solid Tumor	A22K	1	1	1	0	1	Yes
1001	BRCA	Female	TCGA-AC-A3YI	TCGA-AC-A3YI-01A-21R-A239-07	TCGA-AC-A3YI-01A	TP	Primary solid Tumor	A239	1	1	1	0	1	Yes
1002	BRCA	Female	TCGA-D8-A1XO	TCGA-D8-A1XO-01A-11R-A14M-07	TCGA-D8-A1XO-01A	TP	Primary solid Tumor	A14M	1	1	1	0	1	Yes
1003	BRCA	Female	TCGA-BH-A0C3	TCGA-BH-A0C3-11A-23R-A12P-07	TCGA-BH-A0C3-11A	NT	Solid Tissue Normal	A12P	1	1	1	0	1	Yes
1004	BRCA	Female	TCGA-D8-A1XS	TCGA-D8-A1XS-01A-11R-A14M-07	TCGA-D8-A1XS-01A	TP	Primary solid Tumor	A14M	1	1	1	0	1	Yes
1005	BRCA	Female	TCGA-BH-A0C7	TCGA-BH-A0C7-01B-11R-A115-07	TCGA-BH-A0C7-01B	TP	Primary solid Tumor	A115	1	1	1	0	1	Yes
1006	BRCA	Female	TCGA-BH-A0DD	TCGA-BH-A0DD-11A-23R-A12P-07	TCGA-BH-A0DD-11A	NT	Solid Tissue Normal	A12P	1	1	1	0	1	Yes
1007	BRCA	Female	TCGA-AR-A0U3	TCGA-AR-A0U3-01A-11R-A109-07	TCGA-AR-A0U3-01A	TP	Primary solid Tumor	A109	1	1	1	0	1	Yes
1008	BRCA	Female	TCGA-AR-A0U4	TCGA-AR-A0U4-01A-11R-A109-07	TCGA-AR-A0U4-01A	TP	Primary solid Tumor	A109	1	1	1	0	1	Yes
1009	BRCA	Female	TCGA-BH-A1FB	TCGA-BH-A1FB-01A-11R-A13Q-07	TCGA-BH-A1FB-01A	TP	Primary solid Tumor	A13Q	1	1	1	0	1	Yes
1010	BRCA	Female	TCGA-A1-A0SM	TCGA-A1-A0SM-01A-11R-A084-07	TCGA-A1-A0SM-01A	TP	Primary solid Tumor	A084	1	1	1	0	1	Yes
1011	BRCA	Female	TCGA-BH-A1FD	TCGA-BH-A1FD-11B-21R-A13Q-07	TCGA-BH-A1FD-11B	NT	Solid Tissue Normal	A13Q	1	1	1	0	1	Yes
1012	BRCA	Female	TCGA-BH-A1FD	TCGA-BH-A1FD-01A-11R-A13Q-07	TCGA-BH-A1FD-01A	TP	Primary solid Tumor	A13Q	1	1	1	0	1	Yes
1013	BRCA	Female	TCGA-A1-A0SO	TCGA-A1-A0SO-01A-22R-A084-07	TCGA-A1-A0SO-01A	TP	Primary solid Tumor	A084	1	1	1	0	1	Yes
1014	BRCA	Female	TCGA-E2-A15A	TCGA-E2-A15A-01A-11R-A12D-07	TCGA-E2-A15A-01A	TP	Primary solid Tumor	A12D	1	1	1	0	1	Yes
1015	BRCA	Female	TCGA-A7-A3RF	TCGA-A7-A3RF-01A-11R-A22K-07	TCGA-A7-A3RF-01A	TP	Primary solid Tumor	A22K	1	1	1	0	1	Yes
1016	BRCA	Female	TCGA-A7-A425	TCGA-A7-A425-01A-11R-A24H-07	TCGA-A7-A425-01A	TP	Primary solid Tumor	A24H	1	1	1	0	1	Yes
1017	BRCA	Female	TCGA-A2-A04P	TCGA-A2-A04P-01A-31R-A034-07	TCGA-A2-A04P-01A	TP	Primary solid Tumor	A034	1	1	1	0	1	Yes
1018	BRCA	Female	TCGA-C8-A1HI	TCGA-C8-A1HI-01A-11R-A137-07	TCGA-C8-A1HI-01A	TP	Primary solid Tumor	A137	1	1	1	0	1	Yes
1019	BRCA	Female	TCGA-C8-A1HJ	TCGA-C8-A1HJ-01A-11R-A13Q-07	TCGA-C8-A1HJ-01A	TP	Primary solid Tumor	A13Q	1	1	1	0	1	Yes
1020	BRCA	Female	TCGA-AO-A03R	TCGA-AO-A03R-01A-21R-A034-07	TCGA-AO-A03R-01A	TP	Primary solid Tumor	A034	1	1	1	0	1	Yes
1021	BRCA	Female	TCGA-E9-A1N3	TCGA-E9-A1N3-01A-12R-A157-07	TCGA-E9-A1N3-01A	TP	Primary solid Tumor	A157	1	1	1	0	1	Yes
1022	BRCA	Female	TCGA-AO-A03T	TCGA-AO-A03T-01A-21R-A034-07	TCGA-AO-A03T-01A	TP	Primary solid Tumor	A034	1	1	1	0	1	Yes
1023	BRCA	Female	TCGA-A2-A04V	TCGA-A2-A04V-01A-21R-A034-07	TCGA-A2-A04V-01A	TP	Primary solid Tumor	A034	1	1	1	0	1	Yes
1024	BRCA	Female	TCGA-C8-A1HO	TCGA-C8-A1HO-01A-11R-A13Q-07	TCGA-C8-A1HO-01A	TP	Primary solid Tumor	A13Q	1	1	1	0	1	Yes
1025	BRCA	Female	TCGA-A2-A04Y	TCGA-A2-A04Y-01A-21R-A034-07	TCGA-A2-A04Y-01A	TP	Primary solid Tumor	A034	1	1	1	0	1	Yes
1026	BRCA	Female	TCGA-E2-A15L	TCGA-E2-A15L-01A-11R-A12D-07	TCGA-E2-A15L-01A	TP	Primary solid Tumor	A12D	1	1	1	0	1	Yes
1027	BRCA	Female	TCGA-BH-A1FN	TCGA-BH-A1FN-01A-11R-A13Q-07	TCGA-BH-A1FN-01A	TP	Primary solid Tumor	A13Q	1	1	1	0	1	Yes
1028	BRCA	Female	TCGA-D8-A27V	TCGA-D8-A27V-01A-12R-A17B-07	TCGA-D8-A27V-01A	TP	Primary solid Tumor	A17B	1	1	1	0	1	Yes
1029	BRCA	Female	TCGA-A2-A0CO	TCGA-A2-A0CO-01A-13R-A22K-07	TCGA-A2-A0CO-01A	TP	Primary solid Tumor	A22K	1	1	1	0	1	Yes
1030	BRCA	Female	TCGA-BH-A1FU	TCGA-BH-A1FU-01A-11R-A14D-07	TCGA-BH-A1FU-01A	TP	Primary solid Tumor	A14D	1	1	1	0	1	Yes
1031	BRCA	Female	TCGA-BH-A1FU	TCGA-BH-A1FU-11A-23R-A14D-07	TCGA-BH-A1FU-11A	NT	Solid Tissue Normal	A14D	1	1	1	0	1	Yes
1032	BRCA	Female	TCGA-BH-A202	TCGA-BH-A202-01A-11R-A14M-07	TCGA-BH-A202-01A	TP	Primary solid Tumor	A14M	1	1	1	0	1	Yes
1033	BRCA	Female	TCGA-A2-A0CU	TCGA-A2-A0CU-01A-12R-A034-07	TCGA-A2-A0CU-01A	TP	Primary solid Tumor	A034	1	1	1	0	1	Yes
1034	BRCA	Female	TCGA-AO-A0JD	TCGA-AO-A0JD-01A-11R-A056-07	TCGA-AO-A0JD-01A	TP	Primary solid Tumor	A056	1	1	1	0	1	Yes
1035	BRCA	Female	TCGA-AO-A0JE	TCGA-AO-A0JE-01A-11R-A056-07	TCGA-AO-A0JE-01A	TP	Primary solid Tumor	A056	1	1	1	0	1	Yes
1036	BRCA	Female	TCGA-PL-A8LV	TCGA-PL-A8LV-01A-21R-A41B-07	TCGA-PL-A8LV-01A	TP	Primary solid Tumor	A41B	1	1	1	0	1	Yes
1037	BRCA	Female	TCGA-AO-A0JG	TCGA-AO-A0JG-01A-31R-A084-07	TCGA-AO-A0JG-01A	TP	Primary solid Tumor	A084	1	1	1	0	1	Yes
1038	BRCA	Female	TCGA-A2-A0CY	TCGA-A2-A0CY-01A-12R-A034-07	TCGA-A2-A0CY-01A	TP	Primary solid Tumor	A034	1	1	1	0	1	Yes
1039	BRCA	Female	TCGA-A2-A0CZ	TCGA-A2-A0CZ-01A-11R-A034-07	TCGA-A2-A0CZ-01A	TP	Primary solid Tumor	A034	1	1	1	0	1	Yes
1040	BRCA	Female	TCGA-PL-A8LZ	TCGA-PL-A8LZ-01A-31R-A36F-07	TCGA-PL-A8LZ-01A	TP	Primary solid Tumor	A36F	1	1	1	0	1	Yes
1041	BRCA	Female	TCGA-LD-A66U	TCGA-LD-A66U-01A-11R-A31O-07	TCGA-LD-A66U-01A	TP	Primary solid Tumor	A31O	1	1	1	0	1	Yes
1042	BRCA	Female	TCGA-3C-AALJ	TCGA-3C-AALJ-01A-31R-A41B-07	TCGA-3C-AALJ-01A	TP	Primary solid Tumor	A41B	1	1	1	0	1	Yes
1043	BRCA	Female	TCGA-A8-A06U	TCGA-A8-A06U-01A-11R-A00Z-07	TCGA-A8-A06U-01A	TP	Primary solid Tumor	A00Z	1	1	1	0	1	Yes
1044	BRCA	Female	TCGA-A8-A06X	TCGA-A8-A06X-01A-21R-A00Z-07	TCGA-A8-A06X-01A	TP	Primary solid Tumor	A00Z	1	1	1	0	1	Yes
1045	BRCA	Female	TCGA-A8-A06Z	TCGA-A8-A06Z-01A-11R-A00Z-07	TCGA-A8-A06Z-01A	TP	Primary solid Tumor	A00Z	1	1	1	0	1	Yes
1046	BRCA	Female	TCGA-BH-A28Q	TCGA-BH-A28Q-01A-11R-A16F-07	TCGA-BH-A28Q-01A	TP	Primary solid Tumor	A16F	1	1	1	0	1	Yes
1047	BRCA	Female	TCGA-E9-A1R5	TCGA-E9-A1R5-01A-11R-A14M-07	TCGA-E9-A1R5-01A	TP	Primary solid Tumor	A14M	1	1	1	0	1	Yes
1048	BRCA	Female	TCGA-A8-A079	TCGA-A8-A079-01A-21R-A00Z-07	TCGA-A8-A079-01A	TP	Primary solid Tumor	A00Z	1	1	1	0	1	Yes
1049	BRCA	Female	TCGA-GM-A2DC	TCGA-GM-A2DC-01A-11R-A18M-07	TCGA-GM-A2DC-01A	TP	Primary solid Tumor	A18M	1	1	1	0	1	Yes
1050	BRCA	Female	TCGA-GM-A2DD	TCGA-GM-A2DD-01A-11R-A180-07	TCGA-GM-A2DD-01A	TP	Primary solid Tumor	A180	1	1	1	0	1	Yes
1051	BRCA	Female	TCGA-AO-A12B	TCGA-AO-A12B-01A-11R-A10J-07	TCGA-AO-A12B-01A	TP	Primary solid Tumor	A10J	1	1	1	0	1	Yes
1052	BRCA	Female	TCGA-AO-A12C	TCGA-AO-A12C-01A-11R-A10J-07	TCGA-AO-A12C-01A	TP	Primary solid Tumor	A10J	1	1	1	0	1	Yes
1053	BRCA	Female	TCGA-AO-A12D	TCGA-AO-A12D-01A-11R-A115-07	TCGA-AO-A12D-01A	TP	Primary solid Tumor	A115	1	1	1	0	1	Yes
1054	BRCA	Female	TCGA-AO-A12E	TCGA-AO-A12E-01A-11R-A10J-07	TCGA-AO-A12E-01A	TP	Primary solid Tumor	A10J	1	1	1	0	1	Yes
1055	BRCA	Female	TCGA-AO-A12F	TCGA-AO-A12F-01A-11R-A115-07	TCGA-AO-A12F-01A	TP	Primary solid Tumor	A115	1	1	1	0	1	Yes
1056	BRCA	Female	TCGA-AO-A12G	TCGA-AO-A12G-01A-11R-A10J-07	TCGA-AO-A12G-01A	TP	Primary solid Tumor	A10J	1	1	1	0	1	Yes
1057	BRCA	Female	TCGA-A8-A07R	TCGA-A8-A07R-01A-21R-A034-07	TCGA-A8-A07R-01A	TP	Primary solid Tumor	A034	1	1	1	0	1	Yes
1058	BRCA	Female	TCGA-A8-A07S	TCGA-A8-A07S-01A-11R-A034-07	TCGA-A8-A07S-01A	TP	Primary solid Tumor	A034	1	1	1	0	1	Yes
1059	BRCA	Female	TCGA-A8-A07U	TCGA-A8-A07U-01A-11R-A034-07	TCGA-A8-A07U-01A	TP	Primary solid Tumor	A034	1	1	1	0	1	Yes
1060	BRCA	Female	TCGA-A8-A07W	TCGA-A8-A07W-01A-11R-A00Z-07	TCGA-A8-A07W-01A	TP	Primary solid Tumor	A00Z	1	1	1	0	1	Yes
1061	BRCA	Female	TCGA-A8-A07Z	TCGA-A8-A07Z-01A-11R-A00Z-07	TCGA-A8-A07Z-01A	TP	Primary solid Tumor	A00Z	1	1	1	0	1	Yes
1062	BRCA	Female	TCGA-B6-A0IO	TCGA-B6-A0IO-01A-11R-A034-07	TCGA-B6-A0IO-01A	TP	Primary solid Tumor	A034	1	1	1	0	1	Yes
1063	BRCA	Female	TCGA-E2-A1LB	TCGA-E2-A1LB-01A-11R-A144-07	TCGA-E2-A1LB-01A	TP	Primary solid Tumor	A144	1	1	1	0	1	Yes
1064	BRCA	Female	TCGA-A8-A083	TCGA-A8-A083-01A-21R-A00Z-07	TCGA-A8-A083-01A	TP	Primary solid Tumor	A00Z	1	1	1	0	1	Yes
1065	BRCA	Female	TCGA-BH-A0HP	TCGA-BH-A0HP-01A-12R-A084-07	TCGA-BH-A0HP-01A	TP	Primary solid Tumor	A084	1	1	1	0	1	Yes
1066	BRCA	Female	TCGA-A8-A084	TCGA-A8-A084-01A-21R-A00Z-07	TCGA-A8-A084-01A	TP	Primary solid Tumor	A00Z	1	1	1	0	1	Yes
1067	BRCA	Female	TCGA-E9-A1RI	TCGA-E9-A1RI-01A-11R-A169-07	TCGA-E9-A1RI-01A	TP	Primary solid Tumor	A169	1	1	1	0	1	Yes
1068	BRCA	Female	TCGA-LL-A5YP	TCGA-LL-A5YP-01A-21R-A28M-07	TCGA-LL-A5YP-01A	TP	Primary solid Tumor	A28M	1	1	1	0	1	Yes
1069	BRCA	Female	TCGA-A8-A08B	TCGA-A8-A08B-01A-11R-A00Z-07	TCGA-A8-A08B-01A	TP	Primary solid Tumor	A00Z	1	1	1	0	1	Yes
1070	BRCA	Female	TCGA-B6-A0RM	TCGA-B6-A0RM-01A-11R-A084-07	TCGA-B6-A0RM-01A	TP	Primary solid Tumor	A084	1	1	1	0	1	Yes
1071	BRCA	Female	TCGA-B6-A0RN	TCGA-B6-A0RN-01A-12R-A084-07	TCGA-B6-A0RN-01A	TP	Primary solid Tumor	A084	1	1	1	0	1	Yes
1072	BRCA	Female	TCGA-A8-A08G	TCGA-A8-A08G-01A-11R-A00Z-07	TCGA-A8-A08G-01A	TP	Primary solid Tumor	A00Z	1	1	1	0	1	Yes
1073	BRCA	Female	TCGA-LL-A73Z	TCGA-LL-A73Z-01A-11R-A32P-07	TCGA-LL-A73Z-01A	TP	Primary solid Tumor	A32P	1	1	1	0	1	Yes
1074	BRCA	Female	TCGA-LL-A740	TCGA-LL-A740-01A-21R-A32P-07	TCGA-LL-A740-01A	TP	Primary solid Tumor	A32P	1	1	1	0	1	Yes
1075	BRCA	Female	TCGA-LL-A7SZ	TCGA-LL-A7SZ-01A-32R-A352-07	TCGA-LL-A7SZ-01A	TP	Primary solid Tumor	A352	1	1	1	0	1	Yes
1076	BRCA	Female	TCGA-LL-A7T0	TCGA-LL-A7T0-01A-31R-A352-07	TCGA-LL-A7T0-01A	TP	Primary solid Tumor	A352	1	1	1	0	1	Yes
1077	BRCA	Female	TCGA-A8-A08O	TCGA-A8-A08O-01A-21R-A056-07	TCGA-A8-A08O-01A	TP	Primary solid Tumor	A056	1	1	1	0	1	Yes
1078	BRCA	Female	TCGA-A2-A0YE	TCGA-A2-A0YE-01A-11R-A109-07	TCGA-A2-A0YE-01A	TP	Primary solid Tumor	A109	1	1	1	0	1	Yes
1079	BRCA	Female	TCGA-E9-A22H	TCGA-E9-A22H-01A-11R-A157-07	TCGA-E9-A22H-01A	TP	Primary solid Tumor	A157	1	1	1	0	1	Yes
1080	BRCA	Female	TCGA-AC-A3TN	TCGA-AC-A3TN-01A-11R-A22K-07	TCGA-AC-A3TN-01A	TP	Primary solid Tumor	A22K	1	1	1	0	1	Yes
1081	BRCA	Female	TCGA-BH-A0AY	TCGA-BH-A0AY-01A-21R-A00Z-07	TCGA-BH-A0AY-01A	TP	Primary solid Tumor	A00Z	1	1	1	0	1	Yes
1082	BRCA	Female	TCGA-D8-A13Y	TCGA-D8-A13Y-01A-11R-A115-07	TCGA-D8-A13Y-01A	TP	Primary solid Tumor	A115	1	1	1	0	1	Yes
1083	BRCA	Female	TCGA-E9-A249	TCGA-E9-A249-01A-11R-A169-07	TCGA-E9-A249-01A	TP	Primary solid Tumor	A169	1	1	1	0	1	Yes
1084	BRCA	Female	TCGA-BH-A18K	TCGA-BH-A18K-01A-11R-A12D-07	TCGA-BH-A18K-01A	TP	Primary solid Tumor	A12D	1	1	1	0	1	Yes
1085	BRCA	Female	TCGA-D8-A142	TCGA-D8-A142-01A-11R-A115-07	TCGA-D8-A142-01A	TP	Primary solid Tumor	A115	1	1	1	0	1	Yes
1086	BRCA	Female	TCGA-E9-A2JS	TCGA-E9-A2JS-01A-11R-A180-07	TCGA-E9-A2JS-01A	TP	Primary solid Tumor	A180	1	1	1	0	1	Yes
1087	BRCA	Female	TCGA-D8-A143	TCGA-D8-A143-01A-11R-A115-07	TCGA-D8-A143-01A	TP	Primary solid Tumor	A115	1	1	1	0	1	Yes
1088	BRCA	Female	TCGA-D8-A145	TCGA-D8-A145-01A-11R-A115-07	TCGA-D8-A145-01A	TP	Primary solid Tumor	A115	1	1	1	0	1	Yes
1089	BRCA	Female	TCGA-EW-A1PA	TCGA-EW-A1PA-01A-11R-A144-07	TCGA-EW-A1PA-01A	TP	Primary solid Tumor	A144	1	1	1	0	1	Yes
1090	BRCA	Female	TCGA-A8-A09D	TCGA-A8-A09D-01A-11R-A00Z-07	TCGA-A8-A09D-01A	TP	Primary solid Tumor	A00Z	1	1	1	0	1	Yes
1091	BRCA	Female	TCGA-BH-A0B8	TCGA-BH-A0B8-01A-21R-A056-07	TCGA-BH-A0B8-01A	TP	Primary solid Tumor	A056	1	1	1	0	1	Yes
1092	BRCA	Female	TCGA-EW-A1PD	TCGA-EW-A1PD-01A-11R-A144-07	TCGA-EW-A1PD-01A	TP	Primary solid Tumor	A144	1	1	1	0	1	Yes
1093	BRCA	Female	TCGA-EW-A1PE	TCGA-EW-A1PE-01A-11R-A144-07	TCGA-EW-A1PE-01A	TP	Primary solid Tumor	A144	1	1	1	0	1	Yes
1094	BRCA	Female	TCGA-A7-A0CD	TCGA-A7-A0CD-01A-11R-A00Z-07	TCGA-A7-A0CD-01A	TP	Primary solid Tumor	A00Z	1	1	1	0	1	Yes
1095	BRCA	Female	TCGA-D8-A1JC	TCGA-D8-A1JC-01A-11R-A13Q-07	TCGA-D8-A1JC-01A	TP	Primary solid Tumor	A13Q	1	1	1	0	1	Yes
1096	BRCA	Female	TCGA-D8-A1JD	TCGA-D8-A1JD-01A-11R-A13Q-07	TCGA-D8-A1JD-01A	TP	Primary solid Tumor	A13Q	1	1	1	0	1	Yes
1097	BRCA	Female	TCGA-D8-A1JE	TCGA-D8-A1JE-01A-11R-A13Q-07	TCGA-D8-A1JE-01A	TP	Primary solid Tumor	A13Q	1	1	1	0	1	Yes
1098	BRCA	Female	TCGA-A7-A0CH	TCGA-A7-A0CH-11A-32R-A089-07	TCGA-A7-A0CH-11A	NT	Solid Tissue Normal	A089	1	1	1	0	1	Yes
1099	BRCA	Female	TCGA-A7-A0CH	TCGA-A7-A0CH-01A-21R-A00Z-07	TCGA-A7-A0CH-01A	TP	Primary solid Tumor	A00Z	1	1	1	0	1	Yes
1100	BRCA	Female	TCGA-A7-A0CJ	TCGA-A7-A0CJ-01A-21R-A00Z-07	TCGA-A7-A0CJ-01A	TP	Primary solid Tumor	A00Z	1	1	1	0	1	Yes
1101	BRCA	Female	TCGA-AN-A04D	TCGA-AN-A04D-01A-21R-A034-07	TCGA-AN-A04D-01A	TP	Primary solid Tumor	A034	1	1	1	0	1	Yes
1102	BRCA	Female	TCGA-A8-A09V	TCGA-A8-A09V-01A-11R-A034-07	TCGA-A8-A09V-01A	TP	Primary solid Tumor	A034	1	1	1	0	1	Yes
1103	BRCA	Female	TCGA-A8-A09W	TCGA-A8-A09W-01A-11R-A00Z-07	TCGA-A8-A09W-01A	TP	Primary solid Tumor	A00Z	1	1	1	0	1	Yes
1104	BRCA	Female	TCGA-D8-A1JL	TCGA-D8-A1JL-01A-11R-A13Q-07	TCGA-D8-A1JL-01A	TP	Primary solid Tumor	A13Q	1	1	1	0	1	Yes
1105	BRCA	Female	TCGA-D8-A1JM	TCGA-D8-A1JM-01A-11R-A13Q-07	TCGA-D8-A1JM-01A	TP	Primary solid Tumor	A13Q	1	1	1	0	1	Yes
1106	BRCA	Female	TCGA-A8-A09Z	TCGA-A8-A09Z-01A-11R-A00Z-07	TCGA-A8-A09Z-01A	TP	Primary solid Tumor	A00Z	1	1	1	0	1	Yes
1107	BRCA	Female	TCGA-D8-A1JP	TCGA-D8-A1JP-01A-11R-A13Q-07	TCGA-D8-A1JP-01A	TP	Primary solid Tumor	A13Q	1	1	1	0	1	Yes
1108	BRCA	Female	TCGA-D8-A1JS	TCGA-D8-A1JS-01A-11R-A13Q-07	TCGA-D8-A1JS-01A	TP	Primary solid Tumor	A13Q	1	1	1	0	1	Yes
1109	BRCA	Female	TCGA-AN-A0AT	TCGA-AN-A0AT-01A-11R-A034-07	TCGA-AN-A0AT-01A	TP	Primary solid Tumor	A034	1	1	1	0	1	Yes
1110	BRCA	Female	TCGA-A8-A0A4	TCGA-A8-A0A4-01A-11R-A00Z-07	TCGA-A8-A0A4-01A	TP	Primary solid Tumor	A00Z	1	1	1	0	1	Yes
1111	BRCA	Female	TCGA-A8-A0A6	TCGA-A8-A0A6-01A-12R-A056-07	TCGA-A8-A0A6-01A	TP	Primary solid Tumor	A056	1	1	1	0	1	Yes
1112	BRCA	Female	TCGA-A8-A0A7	TCGA-A8-A0A7-01A-11R-A00Z-07	TCGA-A8-A0A7-01A	TP	Primary solid Tumor	A00Z	1	1	1	0	1	Yes
1113	BRCA	Female	TCGA-C8-A12K	TCGA-C8-A12K-01A-21R-A115-07	TCGA-C8-A12K-01A	TP	Primary solid Tumor	A115	1	1	1	0	1	Yes
1114	BRCA	Female	TCGA-C8-A12L	TCGA-C8-A12L-01A-11R-A115-07	TCGA-C8-A12L-01A	TP	Primary solid Tumor	A115	1	1	1	0	1	Yes
1115	BRCA	Female	TCGA-C8-A12M	TCGA-C8-A12M-01A-11R-A115-07	TCGA-C8-A12M-01A	TP	Primary solid Tumor	A115	1	1	1	0	1	Yes
1116	BRCA	Female	TCGA-C8-A12N	TCGA-C8-A12N-01A-11R-A115-07	TCGA-C8-A12N-01A	TP	Primary solid Tumor	A115	1	1	1	0	1	Yes
1117	BRCA	Female	TCGA-C8-A12O	TCGA-C8-A12O-01A-11R-A115-07	TCGA-C8-A12O-01A	TP	Primary solid Tumor	A115	1	1	1	0	1	Yes
1118	BRCA	Female	TCGA-D8-A1XD	TCGA-D8-A1XD-01A-11R-A14D-07	TCGA-D8-A1XD-01A	TP	Primary solid Tumor	A14D	1	1	1	0	1	Yes
1119	BRCA	Female	TCGA-E2-A14V	TCGA-E2-A14V-01A-11R-A12D-07	TCGA-E2-A14V-01A	TP	Primary solid Tumor	A12D	1	1	1	0	1	Yes
1120	BRCA	Female	TCGA-BH-A0E6	TCGA-BH-A0E6-01A-11R-A034-07	TCGA-BH-A0E6-01A	TP	Primary solid Tumor	A034	1	1	1	0	1	Yes
1121	BRCA	Female	TCGA-AC-A3W5	TCGA-AC-A3W5-01A-11R-A22K-07	TCGA-AC-A3W5-01A	TP	Primary solid Tumor	A22K	1	1	1	0	1	Yes
1122	BRCA	Female	TCGA-BH-A0C0	TCGA-BH-A0C0-01A-21R-A056-07	TCGA-BH-A0C0-01A	TP	Primary solid Tumor	A056	1	1	1	0	1	Yes
1123	BRCA	Female	TCGA-D8-A1XL	TCGA-D8-A1XL-01A-11R-A14M-07	TCGA-D8-A1XL-01A	TP	Primary solid Tumor	A14M	1	1	1	0	1	Yes
1124	BRCA	Female	TCGA-A7-A26E	TCGA-A7-A26E-01A-11R-A277-07	TCGA-A7-A26E-01A	TP	Primary solid Tumor	A277	0	1	0	0	1	No
1125	BRCA	Female	TCGA-BH-A0C3	TCGA-BH-A0C3-01A-21R-A12P-07	TCGA-BH-A0C3-01A	TP	Primary solid Tumor	A12P	1	1	1	0	1	Yes
1126	BRCA	Female	TCGA-A1-A0SF	TCGA-A1-A0SF-01A-11R-A144-07	TCGA-A1-A0SF-01A	TP	Primary solid Tumor	A144	1	1	1	0	1	Yes
1127	BRCA	Female	TCGA-A1-A0SG	TCGA-A1-A0SG-01A-11R-A144-07	TCGA-A1-A0SG-01A	TP	Primary solid Tumor	A144	1	1	1	0	1	Yes
1128	BRCA	Female	TCGA-AN-A0XO	TCGA-AN-A0XO-01A-11R-A109-07	TCGA-AN-A0XO-01A	TP	Primary solid Tumor	A109	1	1	1	0	1	Yes
1129	BRCA	Female	TCGA-AN-A0XP	TCGA-AN-A0XP-01A-11R-A109-07	TCGA-AN-A0XP-01A	TP	Primary solid Tumor	A109	1	1	1	0	1	Yes
1130	BRCA	Female	TCGA-A1-A0SK	TCGA-A1-A0SK-01A-12R-A084-07	TCGA-A1-A0SK-01A	TP	Primary solid Tumor	A084	1	1	1	0	1	Yes
1131	BRCA	Female	TCGA-C8-A133	TCGA-C8-A133-01A-32R-A12D-07	TCGA-C8-A133-01A	TP	Primary solid Tumor	A12D	1	1	1	0	1	Yes
1132	BRCA	Female	TCGA-C8-A134	TCGA-C8-A134-01A-11R-A115-07	TCGA-C8-A134-01A	TP	Primary solid Tumor	A115	1	1	1	0	1	Yes
1133	BRCA	Female	TCGA-C8-A135	TCGA-C8-A135-01A-11R-A115-07	TCGA-C8-A135-01A	TP	Primary solid Tumor	A115	1	1	1	0	1	Yes
1134	BRCA	Female	TCGA-C8-A137	TCGA-C8-A137-01A-11R-A115-07	TCGA-C8-A137-01A	TP	Primary solid Tumor	A115	1	1	1	0	1	Yes
1135	BRCA	Female	TCGA-C8-A138	TCGA-C8-A138-01A-11R-A115-07	TCGA-C8-A138-01A	TP	Primary solid Tumor	A115	1	1	1	0	1	Yes
1136	BRCA	Female	TCGA-C8-A1HE	TCGA-C8-A1HE-01A-11R-A13Q-07	TCGA-C8-A1HE-01A	TP	Primary solid Tumor	A13Q	1	1	1	0	1	Yes
1137	BRCA	Female	TCGA-C8-A1HF	TCGA-C8-A1HF-01A-11R-A137-07	TCGA-C8-A1HF-01A	TP	Primary solid Tumor	A137	1	1	1	0	1	Yes
1138	BRCA	Female	TCGA-C8-A1HG	TCGA-C8-A1HG-01A-11R-A137-07	TCGA-C8-A1HG-01A	TP	Primary solid Tumor	A137	1	1	1	0	1	Yes
1139	BRCA	Female	TCGA-AO-A03L	TCGA-AO-A03L-01A-41R-A056-07	TCGA-AO-A03L-01A	TP	Primary solid Tumor	A056	1	1	1	0	1	Yes
1140	BRCA	Female	TCGA-AO-A03M	TCGA-AO-A03M-01B-11R-A10J-07	TCGA-AO-A03M-01B	TP	Primary solid Tumor	A10J	1	1	1	0	1	Yes
1141	BRCA	Female	TCGA-C8-A1HK	TCGA-C8-A1HK-01A-21R-A13Q-07	TCGA-C8-A1HK-01A	TP	Primary solid Tumor	A13Q	1	1	1	0	1	Yes
1142	BRCA	Female	TCGA-XX-A899	TCGA-XX-A899-01A-11R-A36F-07	TCGA-XX-A899-01A	TP	Primary solid Tumor	A36F	1	1	1	0	1	Yes
1143	BRCA	Female	TCGA-XX-A89A	TCGA-XX-A89A-01A-11R-A36F-07	TCGA-XX-A89A-01A	TP	Primary solid Tumor	A36F	1	1	1	0	1	Yes
1144	BRCA	Female	TCGA-AR-A1AS	TCGA-AR-A1AS-01A-11R-A12P-07	TCGA-AR-A1AS-01A	TP	Primary solid Tumor	A12P	1	1	1	0	1	Yes
1145	BRCA	Female	TCGA-A2-A04W	TCGA-A2-A04W-01A-31R-A115-07	TCGA-A2-A04W-01A	TP	Primary solid Tumor	A115	1	1	1	0	1	Yes
1146	BRCA	Female	TCGA-C8-A26V	TCGA-C8-A26V-01A-11R-A16F-07	TCGA-C8-A26V-01A	TP	Primary solid Tumor	A16F	1	1	1	0	1	Yes
1147	BRCA	Female	TCGA-C8-A26W	TCGA-C8-A26W-01A-11R-A16F-07	TCGA-C8-A26W-01A	TP	Primary solid Tumor	A16F	1	1	1	0	1	Yes
1148	BRCA	Female	TCGA-C8-A26X	TCGA-C8-A26X-01A-31R-A16F-07	TCGA-C8-A26X-01A	TP	Primary solid Tumor	A16F	1	1	1	0	1	Yes
1149	BRCA	Female	TCGA-C8-A26Y	TCGA-C8-A26Y-01A-11R-A16F-07	TCGA-C8-A26Y-01A	TP	Primary solid Tumor	A16F	1	1	1	0	1	Yes
1150	BRCA	Female	TCGA-C8-A26Z	TCGA-C8-A26Z-01A-11R-A16F-07	TCGA-C8-A26Z-01A	TP	Primary solid Tumor	A16F	1	1	1	0	1	Yes
1151	BRCA	Female	TCGA-C8-A273	TCGA-C8-A273-01A-11R-A16F-07	TCGA-C8-A273-01A	TP	Primary solid Tumor	A16F	1	1	1	0	1	Yes
1152	BRCA	Female	TCGA-C8-A274	TCGA-C8-A274-01A-11R-A16F-07	TCGA-C8-A274-01A	TP	Primary solid Tumor	A16F	1	1	1	0	1	Yes
1153	BRCA	Female	TCGA-A2-A0CT	TCGA-A2-A0CT-01A-31R-A056-07	TCGA-A2-A0CT-01A	TP	Primary solid Tumor	A056	1	1	1	0	1	Yes
1154	BRCA	Female	TCGA-BH-A0DZ	TCGA-BH-A0DZ-01A-11R-A00Z-07	TCGA-BH-A0DZ-01A	TP	Primary solid Tumor	A00Z	1	1	1	0	1	Yes
1155	BRCA	Female	TCGA-BH-A0E0	TCGA-BH-A0E0-11A-13R-A089-07	TCGA-BH-A0E0-11A	NT	Solid Tissue Normal	A089	1	1	1	0	1	Yes
1156	BRCA	Female	TCGA-BH-A0E0	TCGA-BH-A0E0-01A-11R-A056-07	TCGA-BH-A0E0-01A	TP	Primary solid Tumor	A056	1	1	1	0	1	Yes
1157	BRCA	Female	TCGA-BH-A0E1	TCGA-BH-A0E1-11A-13R-A089-07	TCGA-BH-A0E1-11A	NT	Solid Tissue Normal	A089	1	1	1	0	1	Yes
1158	BRCA	Female	TCGA-BH-A0E1	TCGA-BH-A0E1-01A-11R-A056-07	TCGA-BH-A0E1-01A	TP	Primary solid Tumor	A056	1	1	1	0	1	Yes
1159	BRCA	Female	TCGA-BH-A0E2	TCGA-BH-A0E2-01A-11R-A056-07	TCGA-BH-A0E2-01A	TP	Primary solid Tumor	A056	1	1	1	0	1	Yes
1160	BRCA	Female	TCGA-D8-A1XF	TCGA-D8-A1XF-01A-11R-A14D-07	TCGA-D8-A1XF-01A	TP	Primary solid Tumor	A14D	1	1	1	0	1	Yes
1161	BRCA	Female	TCGA-BH-A208	TCGA-BH-A208-01A-11R-A157-07	TCGA-BH-A208-01A	TP	Primary solid Tumor	A157	1	1	1	0	1	Yes
1162	BRCA	Female	TCGA-AO-A0JI	TCGA-AO-A0JI-01A-21R-A056-07	TCGA-AO-A0JI-01A	TP	Primary solid Tumor	A056	1	1	1	0	1	Yes
1163	BRCA	Female	TCGA-E2-A1BC	TCGA-E2-A1BC-11A-32R-A12P-07	TCGA-E2-A1BC-11A	NT	Solid Tissue Normal	A12P	1	1	1	0	1	Yes
1164	BRCA	Female	TCGA-E2-A1B6	TCGA-E2-A1B6-01A-31R-A12P-07	TCGA-E2-A1B6-01A	TP	Primary solid Tumor	A12P	1	1	1	0	1	Yes
1165	BRCA	Female	TCGA-E9-A1NG	TCGA-E9-A1NG-11A-52R-A14M-07	TCGA-E9-A1NG-11A	NT	Solid Tissue Normal	A14M	1	1	1	0	1	Yes
1166	BRCA	Female	TCGA-E9-A1NH	TCGA-E9-A1NH-01A-11R-A14D-07	TCGA-E9-A1NH-01A	TP	Primary solid Tumor	A14D	1	1	1	0	1	Yes
1167	BRCA	Female	TCGA-A8-A075	TCGA-A8-A075-01A-11R-A084-07	TCGA-A8-A075-01A	TP	Primary solid Tumor	A084	1	1	1	0	1	Yes
1168	BRCA	Female	TCGA-E9-A1R4	TCGA-E9-A1R4-01A-21R-A14D-07	TCGA-E9-A1R4-01A	TP	Primary solid Tumor	A14D	1	1	1	0	1	Yes
1169	BRCA	Female	TCGA-A8-A076	TCGA-A8-A076-01A-21R-A00Z-07	TCGA-A8-A076-01A	TP	Primary solid Tumor	A00Z	1	1	1	0	1	Yes
1170	BRCA	Female	TCGA-GM-A2DB	TCGA-GM-A2DB-01A-31R-A18M-07	TCGA-GM-A2DB-01A	TP	Primary solid Tumor	A18M	1	1	1	0	1	Yes
1171	BRCA	Female	TCGA-E9-A1R2	TCGA-E9-A1R2-01A-11R-A14D-07	TCGA-E9-A1R2-01A	TP	Primary solid Tumor	A14D	1	1	1	0	1	Yes
1172	BRCA	Female	TCGA-A8-A07E	TCGA-A8-A07E-01A-11R-A034-07	TCGA-A8-A07E-01A	TP	Primary solid Tumor	A034	1	1	1	0	1	Yes
1173	BRCA	Female	TCGA-B6-A0I9	TCGA-B6-A0I9-01A-11R-A034-07	TCGA-B6-A0I9-01A	TP	Primary solid Tumor	A034	1	1	1	0	1	Yes
1174	BRCA	Female	TCGA-AR-A2LJ	TCGA-AR-A2LJ-01A-12R-A19W-07	TCGA-AR-A2LJ-01A	TP	Primary solid Tumor	A19W	1	1	1	0	1	Yes
1175	BRCA	Female	TCGA-AR-A2LK	TCGA-AR-A2LK-01A-11R-A180-07	TCGA-AR-A2LK-01A	TP	Primary solid Tumor	A180	1	1	1	0	1	Yes
1176	BRCA	Female	TCGA-B6-A0IC	TCGA-B6-A0IC-01A-11R-A034-07	TCGA-B6-A0IC-01A	TP	Primary solid Tumor	A034	1	1	1	0	1	Yes
1177	BRCA	Female	TCGA-S3-AA0Z	TCGA-S3-AA0Z-01A-11R-A41B-07	TCGA-S3-AA0Z-01A	TP	Primary solid Tumor	A41B	1	1	1	0	1	Yes
1178	BRCA	Female	TCGA-5L-AAT0	TCGA-5L-AAT0-01A-12R-A41B-07	TCGA-5L-AAT0-01A	TP	Primary solid Tumor	A41B	1	1	1	0	1	Yes
1179	BRCA	Female	TCGA-5L-AAT1	TCGA-5L-AAT1-01A-12R-A41B-07	TCGA-5L-AAT1-01A	TP	Primary solid Tumor	A41B	1	1	1	0	1	Yes
1180	BRCA	Female	TCGA-AR-A2LR	TCGA-AR-A2LR-01A-12R-A18M-07	TCGA-AR-A2LR-01A	TP	Primary solid Tumor	A18M	1	1	1	0	1	Yes
1181	BRCA	Female	TCGA-AR-A2LO	TCGA-AR-A2LO-01A-31R-A18M-07	TCGA-AR-A2LO-01A	TP	Primary solid Tumor	A18M	1	1	1	0	1	Yes
1182	BRCA	Female	TCGA-B6-A0IM	TCGA-B6-A0IM-01A-11R-A034-07	TCGA-B6-A0IM-01A	TP	Primary solid Tumor	A034	1	1	1	0	1	Yes
1183	BRCA	Female	TCGA-A8-A081	TCGA-A8-A081-01A-11R-A00Z-07	TCGA-A8-A081-01A	TP	Primary solid Tumor	A00Z	1	1	1	0	1	Yes
1184	BRCA	Female	TCGA-A8-A082	TCGA-A8-A082-01A-11R-A00Z-07	TCGA-A8-A082-01A	TP	Primary solid Tumor	A00Z	1	1	1	0	1	Yes
1185	BRCA	Female	TCGA-LL-A5YL	TCGA-LL-A5YL-01A-12R-A29R-07	TCGA-LL-A5YL-01A	TP	Primary solid Tumor	A29R	1	1	1	0	1	Yes
1186	BRCA	Female	TCGA-E9-A1RH	TCGA-E9-A1RH-01A-21R-A169-07	TCGA-E9-A1RH-01A	TP	Primary solid Tumor	A169	1	1	1	0	1	Yes
1187	BRCA	Female	TCGA-BH-A0HQ	TCGA-BH-A0HQ-01A-11R-A034-07	TCGA-BH-A0HQ-01A	TP	Primary solid Tumor	A034	1	1	1	0	1	Yes
1188	BRCA	Female	TCGA-BH-A0HU	TCGA-BH-A0HU-01A-11R-A034-07	TCGA-BH-A0HU-01A	TP	Primary solid Tumor	A034	1	1	1	0	1	Yes
1189	BRCA	Female	TCGA-A8-A08A	TCGA-A8-A08A-01A-11R-A32Y-07	TCGA-A8-A08A-01A	TP	Primary solid Tumor	A32Y	1	1	1	0	1	Yes
1190	BRCA	Female	TCGA-B6-A0RL	TCGA-B6-A0RL-01A-11R-A084-07	TCGA-B6-A0RL-01A	TP	Primary solid Tumor	A084	1	1	1	0	1	Yes
1191	BRCA	Female	TCGA-E9-A227	TCGA-E9-A227-01A-11R-A157-07	TCGA-E9-A227-01A	TP	Primary solid Tumor	A157	1	1	1	0	1	Yes
1192	BRCA	Female	TCGA-EW-A1IX	TCGA-EW-A1IX-01A-12R-A144-07	TCGA-EW-A1IX-01A	TP	Primary solid Tumor	A144	1	1	1	0	1	Yes
1193	BRCA	Female	TCGA-A2-A0T4	TCGA-A2-A0T4-01A-31R-A084-07	TCGA-A2-A0T4-01A	TP	Primary solid Tumor	A084	1	1	1	0	1	Yes
1194	BRCA	Female	TCGA-A8-A08H	TCGA-A8-A08H-01A-21R-A00Z-07	TCGA-A8-A08H-01A	TP	Primary solid Tumor	A00Z	1	1	1	0	1	Yes
1195	BRCA	Female	TCGA-A8-A08I	TCGA-A8-A08I-01A-11R-A00Z-07	TCGA-A8-A08I-01A	TP	Primary solid Tumor	A00Z	1	1	1	0	1	Yes
1196	BRCA	Female	TCGA-A8-A08J	TCGA-A8-A08J-01A-11R-A00Z-07	TCGA-A8-A08J-01A	TP	Primary solid Tumor	A00Z	1	1	1	0	1	Yes
1197	BRCA	Female	TCGA-A8-A08L	TCGA-A8-A08L-01A-11R-A00Z-07	TCGA-A8-A08L-01A	TP	Primary solid Tumor	A00Z	1	1	1	0	1	Yes
1198	BRCA	Female	TCGA-BH-A18F	TCGA-BH-A18F-01A-11R-A12D-07	TCGA-BH-A18F-01A	TP	Primary solid Tumor	A12D	1	1	1	0	1	Yes
1199	BRCA	Female	TCGA-E9-A22G	TCGA-E9-A22G-01A-11R-A157-07	TCGA-E9-A22G-01A	TP	Primary solid Tumor	A157	1	1	1	0	1	Yes
1200	BRCA	Female	TCGA-BH-A204	TCGA-BH-A204-01A-11R-A157-07	TCGA-BH-A204-01A	TP	Primary solid Tumor	A157	1	1	1	0	1	Yes
1201	BRCA	Female	TCGA-E2-A14W	TCGA-E2-A14W-01A-11R-A12D-07	TCGA-E2-A14W-01A	TP	Primary solid Tumor	A12D	1	1	1	0	1	Yes
1202	BRCA	Female	TCGA-E2-A14X	TCGA-E2-A14X-01A-11R-A115-07	TCGA-E2-A14X-01A	TP	Primary solid Tumor	A115	1	1	1	0	1	Yes
1203	BRCA	Female	TCGA-BH-A0AZ	TCGA-BH-A0AZ-01A-21R-A12P-07	TCGA-BH-A0AZ-01A	TP	Primary solid Tumor	A12P	1	1	1	0	1	Yes
1204	BRCA	Female	TCGA-B6-A0WX	TCGA-B6-A0WX-01A-11R-A109-07	TCGA-B6-A0WX-01A	TP	Primary solid Tumor	A109	1	1	1	0	1	Yes
1205	BRCA	Female	TCGA-E9-A248	TCGA-E9-A248-01A-11R-A169-07	TCGA-E9-A248-01A	TP	Primary solid Tumor	A169	1	1	1	0	1	Yes
1206	BRCA	Female	TCGA-E9-A295	TCGA-E9-A295-01A-11R-A16F-07	TCGA-E9-A295-01A	TP	Primary solid Tumor	A16F	1	1	1	0	1	Yes
1207	BRCA	Female	TCGA-B6-A0WZ	TCGA-B6-A0WZ-01A-11R-A109-07	TCGA-B6-A0WZ-01A	TP	Primary solid Tumor	A109	1	1	1	0	1	Yes
1208	BRCA	Female	TCGA-BH-A18L	TCGA-BH-A18L-11A-42R-A12D-07	TCGA-BH-A18L-11A	NT	Solid Tissue Normal	A12D	1	1	1	0	1	Yes
1209	BRCA	Female	TCGA-B6-A0X4	TCGA-B6-A0X4-01A-11R-A109-07	TCGA-B6-A0X4-01A	TP	Primary solid Tumor	A109	1	1	1	0	1	Yes
1210	BRCA	Female	TCGA-D8-A146	TCGA-D8-A146-01A-31R-A115-07	TCGA-D8-A146-01A	TP	Primary solid Tumor	A115	1	1	1	0	1	Yes
1211	BRCA	Female	TCGA-EW-A1PC	TCGA-EW-A1PC-01B-11R-A21T-07	TCGA-EW-A1PC-01B	TP	Primary solid Tumor	A21T	1	1	1	0	1	Yes
1212	BRCA	Female	TCGA-D8-A1J9	TCGA-D8-A1J9-01A-11R-A13Q-07	TCGA-D8-A1J9-01A	TP	Primary solid Tumor	A13Q	1	1	1	0	1	Yes
1213	BRCA	Female	TCGA-B6-A1KI	TCGA-B6-A1KI-01A-11R-A14M-07	TCGA-B6-A1KI-01A	TP	Primary solid Tumor	A14M	1	1	1	0	1	Yes
1214	BRCA	Female	TCGA-B6-A2IU	TCGA-B6-A2IU-01A-32R-A18M-07	TCGA-B6-A2IU-01A	TP	Primary solid Tumor	A18M	1	1	1	0	1	Yes
1215	BRCA	Female	TCGA-D8-A1JB	TCGA-D8-A1JB-01A-11R-A13Q-07	TCGA-D8-A1JB-01A	TP	Primary solid Tumor	A13Q	1	1	1	0	1	Yes
1216	BRCA	Female	TCGA-BH-A18R	TCGA-BH-A18R-11A-42R-A12D-07	TCGA-BH-A18R-11A	NT	Solid Tissue Normal	A12D	1	1	1	0	1	Yes
1217	BRCA	Female	TCGA-B6-A400	TCGA-B6-A400-01A-11R-A239-07	TCGA-B6-A400-01A	TP	Primary solid Tumor	A239	1	1	1	0	1	Yes
1218	BRCA	Female	TCGA-BH-A18S	TCGA-BH-A18S-01A-11R-A12D-07	TCGA-BH-A18S-01A	TP	Primary solid Tumor	A12D	1	1	1	0	1	Yes
1219	BRCA	Female	TCGA-A8-A09K	TCGA-A8-A09K-01A-11R-A00Z-07	TCGA-A8-A09K-01A	TP	Primary solid Tumor	A00Z	1	1	1	0	1	Yes
1220	BRCA	Female	TCGA-A8-A09M	TCGA-A8-A09M-01A-11R-A00Z-07	TCGA-A8-A09M-01A	TP	Primary solid Tumor	A00Z	1	1	1	0	1	Yes
1221	BRCA	Female	TCGA-A8-A09N	TCGA-A8-A09N-01A-11R-A00Z-07	TCGA-A8-A09N-01A	TP	Primary solid Tumor	A00Z	1	1	1	0	1	Yes
1222	BRCA	Female	TCGA-A8-A09R	TCGA-A8-A09R-01A-11R-A00Z-07	TCGA-A8-A09R-01A	TP	Primary solid Tumor	A00Z	1	1	1	0	1	Yes
1223	BRCA	Female	TCGA-A7-A0D9	TCGA-A7-A0D9-01A-31R-A056-07	TCGA-A7-A0D9-01A	TP	Primary solid Tumor	A056	1	1	1	0	1	Yes
1224	BRCA	Female	TCGA-A7-A0DA	TCGA-A7-A0DA-01A-31R-A115-07	TCGA-A7-A0DA-01A	TP	Primary solid Tumor	A115	1	1	1	0	1	Yes
1225	BRCA	Female	TCGA-BH-A18V	TCGA-BH-A18V-11A-52R-A12D-07	TCGA-BH-A18V-11A	NT	Solid Tissue Normal	A12D	1	1	1	0	1	Yes
1226	BRCA	Female	TCGA-BH-A1EN	TCGA-BH-A1EN-11A-23R-A13Q-07	TCGA-BH-A1EN-11A	NT	Solid Tissue Normal	A13Q	1	1	1	0	1	Yes
1227	BRCA	Female	TCGA-BH-A1EN	TCGA-BH-A1EN-01A-11R-A13Q-07	TCGA-BH-A1EN-01A	TP	Primary solid Tumor	A13Q	1	1	1	0	1	Yes
1228	BRCA	Female	TCGA-BH-A1EO	TCGA-BH-A1EO-11A-31R-A137-07	TCGA-BH-A1EO-11A	NT	Solid Tissue Normal	A137	1	1	1	0	1	Yes
1229	BRCA	Female	TCGA-BH-A1EO	TCGA-BH-A1EO-01A-11R-A137-07	TCGA-BH-A1EO-01A	TP	Primary solid Tumor	A137	1	1	1	0	1	Yes
1230	BRCA	Female	TCGA-A8-A0A2	TCGA-A8-A0A2-01A-11R-A034-07	TCGA-A8-A0A2-01A	TP	Primary solid Tumor	A034	1	1	1	0	1	Yes
1231	BRCA	Female	TCGA-OL-A66K	TCGA-OL-A66K-01A-11R-A29R-07	TCGA-OL-A66K-01A	TP	Primary solid Tumor	A29R	1	1	1	0	1	Yes
1232	BRCA	Female	TCGA-OL-A66N	TCGA-OL-A66N-01A-12R-A31O-07	TCGA-OL-A66N-01A	TP	Primary solid Tumor	A31O	1	1	1	0	1	Yes
1233	BRCA	Female	TCGA-OL-A66O	TCGA-OL-A66O-01A-11R-A31O-07	TCGA-OL-A66O-01A	TP	Primary solid Tumor	A31O	1	1	1	0	1	Yes
1234	BRCA	Female	TCGA-OL-A66P	TCGA-OL-A66P-01A-11R-A31O-07	TCGA-OL-A66P-01A	TP	Primary solid Tumor	A31O	1	1	1	0	1	Yes
1235	BRCA	Female	TCGA-OL-A6VO	TCGA-OL-A6VO-01A-12R-A33J-07	TCGA-OL-A6VO-01A	TP	Primary solid Tumor	A33J	1	1	1	0	1	Yes
1236	BRCA	Female	TCGA-OL-A6VQ	TCGA-OL-A6VQ-01A-12R-A41B-07	TCGA-OL-A6VQ-01A	TP	Primary solid Tumor	A41B	1	1	1	0	1	Yes
1237	BRCA	Female	TCGA-OL-A6VR	TCGA-OL-A6VR-01A-32R-A33J-07	TCGA-OL-A6VR-01A	TP	Primary solid Tumor	A33J	1	1	1	0	1	Yes
1238	BRCA	Female	TCGA-E2-A14R	TCGA-E2-A14R-01A-11R-A115-07	TCGA-E2-A14R-01A	TP	Primary solid Tumor	A115	1	1	1	0	1	Yes
1239	BRCA	Female	TCGA-Z7-A8R5	TCGA-Z7-A8R5-01A-42R-A41B-07	TCGA-Z7-A8R5-01A	TP	Primary solid Tumor	A41B	1	1	1	0	1	Yes
1240	BRCA	Female	TCGA-BH-A0WA	TCGA-BH-A0WA-01A-11R-A109-07	TCGA-BH-A0WA-01A	TP	Primary solid Tumor	A109	1	1	1	0	1	Yes
1241	BRCA	Female	TCGA-PL-A8LY	TCGA-PL-A8LY-01A-11R-A41B-07	TCGA-PL-A8LY-01A	TP	Primary solid Tumor	A41B	1	1	1	0	1	Yes
1242	BRCA	Female	TCGA-A8-A06R	TCGA-A8-A06R-01A-11R-A00Z-07	TCGA-A8-A06R-01A	TP	Primary solid Tumor	A00Z	1	1	1	0	1	Yes
1243	BRCA	Female	TCGA-BH-A1F2	TCGA-BH-A1F2-11A-32R-A13Q-07	TCGA-BH-A1F2-11A	NT	Solid Tissue Normal	A13Q	1	1	1	0	1	Yes
1244	BRCA	Female	TCGA-A1-A0SB	TCGA-A1-A0SB-01A-11R-A144-07	TCGA-A1-A0SB-01A	TP	Primary solid Tumor	A144	1	1	1	0	1	Yes
1245	BRCA	Female	TCGA-BH-A0C1	TCGA-BH-A0C1-01B-11R-A12D-07	TCGA-BH-A0C1-01B	TP	Primary solid Tumor	A12D	1	1	1	0	1	Yes
1246	BRCA	Female	TCGA-C8-A12X	TCGA-C8-A12X-01A-11R-A115-07	TCGA-C8-A12X-01A	TP	Primary solid Tumor	A115	1	1	1	0	1	Yes
1247	BRCA	Female	TCGA-C8-A12Y	TCGA-C8-A12Y-01A-11R-A12D-07	TCGA-C8-A12Y-01A	TP	Primary solid Tumor	A12D	1	1	1	0	1	Yes
1248	BRCA	Female	TCGA-C8-A12Z	TCGA-C8-A12Z-01A-11R-A115-07	TCGA-C8-A12Z-01A	TP	Primary solid Tumor	A115	1	1	1	0	1	Yes
1249	BRCA	Female	TCGA-C8-A130	TCGA-C8-A130-01A-31R-A115-07	TCGA-C8-A130-01A	TP	Primary solid Tumor	A115	1	1	1	0	1	Yes
1250	BRCA	Female	TCGA-C8-A131	TCGA-C8-A131-01A-11R-A115-07	TCGA-C8-A131-01A	TP	Primary solid Tumor	A115	1	1	1	0	1	Yes
1251	BRCA	Female	TCGA-C8-A132	TCGA-C8-A132-01A-31R-A115-07	TCGA-C8-A132-01A	TP	Primary solid Tumor	A115	1	1	1	0	1	Yes
1252	BRCA	Female	TCGA-E2-A158	TCGA-E2-A158-01A-11R-A12D-07	TCGA-E2-A158-01A	TP	Primary solid Tumor	A12D	1	1	1	0	1	Yes
1253	BRCA	Female	TCGA-E2-A154	TCGA-E2-A154-01A-11R-A115-07	TCGA-E2-A154-01A	TP	Primary solid Tumor	A115	1	1	1	0	1	Yes
1254	BRCA	Female	TCGA-E2-A158	TCGA-E2-A158-11A-22R-A12D-07	TCGA-E2-A158-11A	NT	Solid Tissue Normal	A12D	1	1	1	0	1	Yes
1255	BRCA	Female	TCGA-E2-A159	TCGA-E2-A159-01A-11R-A115-07	TCGA-E2-A159-01A	TP	Primary solid Tumor	A115	1	1	1	0	1	Yes
1256	BRCA	Female	TCGA-BH-A1FE	TCGA-BH-A1FE-11B-14R-A13Q-07	TCGA-BH-A1FE-11B	NT	Solid Tissue Normal	A13Q	1	1	1	0	1	Yes
1257	BRCA	Female	TCGA-A1-A0SP	TCGA-A1-A0SP-01A-11R-A084-07	TCGA-A1-A0SP-01A	TP	Primary solid Tumor	A084	1	1	1	0	1	Yes
1258	BRCA	Female	TCGA-A1-A0SQ	TCGA-A1-A0SQ-01A-21R-A144-07	TCGA-A1-A0SQ-01A	TP	Primary solid Tumor	A144	1	1	1	0	1	Yes
1259	BRCA	Female	TCGA-A2-A04N	TCGA-A2-A04N-01A-11R-A115-07	TCGA-A2-A04N-01A	TP	Primary solid Tumor	A115	1	1	1	0	1	Yes
1260	BRCA	Female	TCGA-A7-A3J1	TCGA-A7-A3J1-01A-11R-A213-07	TCGA-A7-A3J1-01A	TP	Primary solid Tumor	A213	1	1	1	0	1	Yes
1261	BRCA	Female	TCGA-A7-A3J0	TCGA-A7-A3J0-01A-11R-A213-07	TCGA-A7-A3J0-01A	TP	Primary solid Tumor	A213	1	1	1	0	1	Yes
1262	BRCA	Female	TCGA-AO-A03N	TCGA-AO-A03N-01B-11R-A10J-07	TCGA-AO-A03N-01B	TP	Primary solid Tumor	A10J	1	1	1	0	1	Yes
1263	BRCA	Female	TCGA-S3-AA17	TCGA-S3-AA17-01A-11R-A41B-07	TCGA-S3-AA17-01A	TP	Primary solid Tumor	A41B	1	1	1	0	1	Yes
1264	BRCA	Female	TCGA-AO-A03O	TCGA-AO-A03O-01A-11R-A00Z-07	TCGA-AO-A03O-01A	TP	Primary solid Tumor	A00Z	1	1	1	0	1	Yes
1265	BRCA	Female	TCGA-E9-A1N4	TCGA-E9-A1N4-01A-11R-A14M-07	TCGA-E9-A1N4-01A	TP	Primary solid Tumor	A14M	1	1	1	0	1	Yes
1266	BRCA	Female	TCGA-AR-A1AT	TCGA-AR-A1AT-01A-11R-A12P-07	TCGA-AR-A1AT-01A	TP	Primary solid Tumor	A12P	1	1	1	0	1	Yes
1267	BRCA	Female	TCGA-A2-A04X	TCGA-A2-A04X-01A-21R-A034-07	TCGA-A2-A04X-01A	TP	Primary solid Tumor	A034	1	1	1	0	1	Yes
1268	BRCA	Female	TCGA-E9-A1N6	TCGA-E9-A1N6-11A-32R-A144-07	TCGA-E9-A1N6-11A	NT	Solid Tissue Normal	A144	1	1	1	0	1	Yes
1269	BRCA	Female	TCGA-A2-A0CK	TCGA-A2-A0CK-01A-11R-A22K-07	TCGA-A2-A0CK-01A	TP	Primary solid Tumor	A22K	1	1	1	0	1	Yes
1270	BRCA	Female	TCGA-E2-A15M	TCGA-E2-A15M-01A-11R-A12D-07	TCGA-E2-A15M-01A	TP	Primary solid Tumor	A12D	1	1	1	0	1	Yes
1271	BRCA	Female	TCGA-BH-A1FR	TCGA-BH-A1FR-01A-11R-A13Q-07	TCGA-BH-A1FR-01A	TP	Primary solid Tumor	A13Q	1	1	1	0	1	Yes
1272	BRCA	Female	TCGA-E2-A15O	TCGA-E2-A15O-01A-11R-A115-07	TCGA-E2-A15O-01A	TP	Primary solid Tumor	A115	1	1	1	0	1	Yes
1273	BRCA	Female	TCGA-E2-A15P	TCGA-E2-A15P-01A-11R-A115-07	TCGA-E2-A15P-01A	TP	Primary solid Tumor	A115	1	1	1	0	1	Yes
1274	BRCA	Female	TCGA-BH-A0DZ	TCGA-BH-A0DZ-11A-22R-A089-07	TCGA-BH-A0DZ-11A	NT	Solid Tissue Normal	A089	1	1	1	0	1	Yes
1275	BRCA	Female	TCGA-E2-A15S	TCGA-E2-A15S-01A-11R-A115-07	TCGA-E2-A15S-01A	TP	Primary solid Tumor	A115	1	1	1	0	1	Yes
1276	BRCA	Female	TCGA-E2-A15T	TCGA-E2-A15T-01A-11R-A115-07	TCGA-E2-A15T-01A	TP	Primary solid Tumor	A115	1	1	1	0	1	Yes
1277	BRCA	Female	TCGA-E2-A1AZ	TCGA-E2-A1AZ-01A-11R-A12P-07	TCGA-E2-A1AZ-01A	TP	Primary solid Tumor	A12P	1	1	1	0	1	Yes
1278	BRCA	Female	TCGA-BH-A203	TCGA-BH-A203-01A-12R-A169-07	TCGA-BH-A203-01A	TP	Primary solid Tumor	A169	1	1	1	0	1	Yes
1279	BRCA	Female	TCGA-BH-A204	TCGA-BH-A204-11A-53R-A157-07	TCGA-BH-A204-11A	NT	Solid Tissue Normal	A157	1	1	1	0	1	Yes
1280	BRCA	Female	TCGA-A7-A13E	TCGA-A7-A13E-11A-61R-A12P-07	TCGA-A7-A13E-11A	NT	Solid Tissue Normal	A12P	1	1	1	0	1	Yes
1281	BRCA	Female	TCGA-Z7-A8R6	TCGA-Z7-A8R6-01A-11R-A41B-07	TCGA-Z7-A8R6-01A	TP	Primary solid Tumor	A41B	1	1	1	0	1	Yes
1282	BRCA	Female	TCGA-D8-A1XG	TCGA-D8-A1XG-01A-11R-A14D-07	TCGA-D8-A1XG-01A	TP	Primary solid Tumor	A14D	1	1	1	0	1	Yes
1283	BRCA	Female	TCGA-BH-A208	TCGA-BH-A208-11A-51R-A157-07	TCGA-BH-A208-11A	NT	Solid Tissue Normal	A157	1	1	1	0	1	Yes
1284	BRCA	Female	TCGA-AO-A0JJ	TCGA-AO-A0JJ-01A-11R-A056-07	TCGA-AO-A0JJ-01A	TP	Primary solid Tumor	A056	1	1	1	0	1	Yes
1285	BRCA	Female	TCGA-BH-A0AZ	TCGA-BH-A0AZ-11A-22R-A12P-07	TCGA-BH-A0AZ-11A	NT	Solid Tissue Normal	A12P	1	1	1	0	1	Yes
1286	BRCA	Female	TCGA-A1-A0SD	TCGA-A1-A0SD-01A-11R-A115-07	TCGA-A1-A0SD-01A	TP	Primary solid Tumor	A115	1	1	1	0	1	Yes
1287	BRCA	Female	TCGA-E9-A1NG	TCGA-E9-A1NG-01A-21R-A14M-07	TCGA-E9-A1NG-01A	TP	Primary solid Tumor	A14M	1	1	1	0	1	Yes
1288	BRCA	Female	TCGA-E9-A1NI	TCGA-E9-A1NI-01A-11R-A14D-07	TCGA-E9-A1NI-01A	TP	Primary solid Tumor	A14D	1	1	1	0	1	Yes
1289	BRCA	Female	TCGA-E9-A1QZ	TCGA-E9-A1QZ-01A-21R-A169-07	TCGA-E9-A1QZ-01A	TP	Primary solid Tumor	A169	1	1	1	0	1	Yes
1290	BRCA	Female	TCGA-E9-A2JT	TCGA-E9-A2JT-01A-22R-A18M-07	TCGA-E9-A2JT-01A	TP	Primary solid Tumor	A18M	1	1	1	0	1	Yes
1291	BRCA	Female	TCGA-B6-A0X5	TCGA-B6-A0X5-01A-21R-A109-07	TCGA-B6-A0X5-01A	TP	Primary solid Tumor	A109	1	1	1	0	1	Yes
1292	BRCA	Female	TCGA-E9-A1R0	TCGA-E9-A1R0-01A-22R-A16F-07	TCGA-E9-A1R0-01A	TP	Primary solid Tumor	A16F	1	1	1	0	1	Yes
1293	BRCA	Female	TCGA-GM-A2DF	TCGA-GM-A2DF-01A-11R-A180-07	TCGA-GM-A2DF-01A	TP	Primary solid Tumor	A180	1	1	1	0	1	Yes
1294	BRCA	Female	TCGA-A8-A07G	TCGA-A8-A07G-01A-11R-A034-07	TCGA-A8-A07G-01A	TP	Primary solid Tumor	A034	1	1	1	0	1	Yes
1295	BRCA	Female	TCGA-BH-A5IZ	TCGA-BH-A5IZ-01A-11R-A27Q-07	TCGA-BH-A5IZ-01A	TP	Primary solid Tumor	A27Q	1	1	1	0	1	Yes
1296	BRCA	Female	TCGA-S3-A6ZG	TCGA-S3-A6ZG-01A-22R-A32P-07	TCGA-S3-A6ZG-01A	TP	Primary solid Tumor	A32P	1	1	1	0	1	Yes
1297	BRCA	Female	TCGA-E2-A1IU	TCGA-E2-A1IU-01A-11R-A14D-07	TCGA-E2-A1IU-01A	TP	Primary solid Tumor	A14D	1	1	1	0	1	Yes
1298	BRCA	Female	TCGA-A8-A07O	TCGA-A8-A07O-01A-11R-A00Z-07	TCGA-A8-A07O-01A	TP	Primary solid Tumor	A00Z	1	1	1	0	1	Yes
1299	BRCA	Female	TCGA-S3-AA10	TCGA-S3-AA10-01A-21R-A41B-07	TCGA-S3-AA10-01A	TP	Primary solid Tumor	A41B	1	1	1	0	1	Yes
1300	BRCA	Female	TCGA-S3-AA11	TCGA-S3-AA11-01A-31R-A41B-07	TCGA-S3-AA11-01A	TP	Primary solid Tumor	A41B	1	1	1	0	1	Yes
1301	BRCA	Female	TCGA-LL-A440	TCGA-LL-A440-01A-11R-A24H-07	TCGA-LL-A440-01A	TP	Primary solid Tumor	A24H	1	1	1	0	1	Yes
1302	BRCA	Female	TCGA-E2-A1LA	TCGA-E2-A1LA-01A-11R-A144-07	TCGA-E2-A1LA-01A	TP	Primary solid Tumor	A144	1	1	1	0	1	Yes
1303	BRCA	Female	TCGA-BH-A0BC	TCGA-BH-A0BC-11A-22R-A089-07	TCGA-BH-A0BC-11A	NT	Solid Tissue Normal	A089	1	1	1	0	1	Yes
1304	BRCA	Female	TCGA-AR-A5QP	TCGA-AR-A5QP-01A-11R-A28M-07	TCGA-AR-A5QP-01A	TP	Primary solid Tumor	A28M	1	1	1	0	1	Yes
1305	BRCA	Female	TCGA-AR-A5QQ	TCGA-AR-A5QQ-01A-11R-A28M-07	TCGA-AR-A5QQ-01A	TP	Primary solid Tumor	A28M	1	1	1	0	1	Yes
1306	BRCA	Female	TCGA-GM-A5PX	TCGA-GM-A5PX-01A-12R-A28M-07	TCGA-GM-A5PX-01A	TP	Primary solid Tumor	A28M	1	1	1	0	1	Yes
1307	BRCA	Female	TCGA-WT-AB44	TCGA-WT-AB44-01A-11R-A41B-07	TCGA-WT-AB44-01A	TP	Primary solid Tumor	A41B	1	1	1	0	1	Yes
1308	BRCA	Female	TCGA-B6-A0IP	TCGA-B6-A0IP-01A-11R-A034-07	TCGA-B6-A0IP-01A	TP	Primary solid Tumor	A034	1	1	1	0	1	Yes
1309	BRCA	Female	TCGA-LL-A5YN	TCGA-LL-A5YN-01A-11R-A28M-07	TCGA-LL-A5YN-01A	TP	Primary solid Tumor	A28M	1	1	1	0	1	Yes
1310	BRCA	Female	TCGA-AC-A2FF	TCGA-AC-A2FF-01A-11R-A17B-07	TCGA-AC-A2FF-01A	TP	Primary solid Tumor	A17B	1	1	1	0	1	Yes
1311	BRCA	Female	TCGA-E9-A226	TCGA-E9-A226-01A-21R-A157-07	TCGA-E9-A226-01A	TP	Primary solid Tumor	A157	1	1	1	0	1	Yes
1312	BRCA	Female	TCGA-BH-A0HX	TCGA-BH-A0HX-01A-21R-A056-07	TCGA-BH-A0HX-01A	TP	Primary solid Tumor	A056	1	1	1	0	1	Yes
1313	BRCA	Female	TCGA-BH-A0HY	TCGA-BH-A0HY-01A-11R-A056-07	TCGA-BH-A0HY-01A	TP	Primary solid Tumor	A056	1	1	1	0	1	Yes
1314	BRCA	Female	TCGA-BH-A0RX	TCGA-BH-A0RX-01A-21R-A084-07	TCGA-BH-A0RX-01A	TP	Primary solid Tumor	A084	1	1	1	0	1	Yes
1315	BRCA	Female	TCGA-EW-A1IZ	TCGA-EW-A1IZ-01A-11R-A13Q-07	TCGA-EW-A1IZ-01A	TP	Primary solid Tumor	A13Q	1	1	1	0	1	Yes
1316	BRCA	Female	TCGA-EW-A1J1	TCGA-EW-A1J1-01A-11R-A13Q-07	TCGA-EW-A1J1-01A	TP	Primary solid Tumor	A13Q	1	1	1	0	1	Yes
1317	BRCA	Female	TCGA-A2-A0T7	TCGA-A2-A0T7-01A-21R-A084-07	TCGA-A2-A0T7-01A	TP	Primary solid Tumor	A084	1	1	1	0	1	Yes
1318	BRCA	Female	TCGA-A2-A0YC	TCGA-A2-A0YC-01A-11R-A109-07	TCGA-A2-A0YC-01A	TP	Primary solid Tumor	A109	1	1	1	0	1	Yes
1319	BRCA	Female	TCGA-A2-A0YD	TCGA-A2-A0YD-01A-11R-A109-07	TCGA-A2-A0YD-01A	TP	Primary solid Tumor	A109	1	1	1	0	1	Yes
1320	BRCA	Female	TCGA-A8-A06P	TCGA-A8-A06P-01A-11R-A00Z-07	TCGA-A8-A06P-01A	TP	Primary solid Tumor	A00Z	1	1	1	0	1	Yes
1321	BRCA	Female	TCGA-PL-A8LX	TCGA-PL-A8LX-01A-11R-A41B-07	TCGA-PL-A8LX-01A	TP	Primary solid Tumor	A41B	1	1	1	0	1	Yes
1322	BRCA	Female	TCGA-AR-A24S	TCGA-AR-A24S-01A-11R-A169-07	TCGA-AR-A24S-01A	TP	Primary solid Tumor	A169	1	1	1	0	1	Yes
1323	BRCA	Female	TCGA-D8-A1XJ	TCGA-D8-A1XJ-01A-11R-A14M-07	TCGA-D8-A1XJ-01A	TP	Primary solid Tumor	A14M	1	1	1	0	1	Yes
1324	BRCA	Female	TCGA-E9-A245	TCGA-E9-A245-01A-22R-A16F-07	TCGA-E9-A245-01A	TP	Primary solid Tumor	A16F	1	1	1	0	1	Yes
1325	BRCA	Female	TCGA-BH-A0BZ	TCGA-BH-A0BZ-01A-31R-A12P-07	TCGA-BH-A0BZ-01A	TP	Primary solid Tumor	A12P	1	1	1	0	1	Yes
1326	BRCA	Female	TCGA-E9-A247	TCGA-E9-A247-01A-11R-A169-07	TCGA-E9-A247-01A	TP	Primary solid Tumor	A169	1	1	1	0	1	Yes
1327	BRCA	Female	TCGA-BH-A18K	TCGA-BH-A18K-11A-13R-A12D-07	TCGA-BH-A18K-11A	NT	Solid Tissue Normal	A12D	1	1	1	0	1	Yes
1328	BRCA	Female	TCGA-A1-A0SE	TCGA-A1-A0SE-01A-11R-A084-07	TCGA-A1-A0SE-01A	TP	Primary solid Tumor	A084	1	1	1	0	1	Yes
1329	BRCA	Female	TCGA-BH-A18L	TCGA-BH-A18L-01A-32R-A12D-07	TCGA-BH-A18L-01A	TP	Primary solid Tumor	A12D	1	1	1	0	1	Yes
1330	BRCA	Female	TCGA-A7-A26G	TCGA-A7-A26G-01A-21R-A169-07	TCGA-A7-A26G-01A	TP	Primary solid Tumor	A169	1	1	1	0	1	Yes
1331	BRCA	Female	TCGA-A7-A26H	TCGA-A7-A26H-01A-11R-A169-07	TCGA-A7-A26H-01A	TP	Primary solid Tumor	A169	1	1	1	0	1	Yes
1332	BRCA	Female	TCGA-EW-A1PB	TCGA-EW-A1PB-01A-11R-A144-07	TCGA-EW-A1PB-01A	TP	Primary solid Tumor	A144	1	1	1	0	1	Yes
1333	BRCA	Female	TCGA-D8-A1J8	TCGA-D8-A1J8-01A-11R-A13Q-07	TCGA-D8-A1J8-01A	TP	Primary solid Tumor	A13Q	1	1	1	0	1	Yes
1334	BRCA	Female	TCGA-BH-A0B5	TCGA-BH-A0B5-01A-11R-A12P-07	TCGA-BH-A0B5-01A	TP	Primary solid Tumor	A12P	1	1	1	0	1	Yes
1335	BRCA	Female	TCGA-D8-A1JA	TCGA-D8-A1JA-01A-11R-A13Q-07	TCGA-D8-A1JA-01A	TP	Primary solid Tumor	A13Q	1	1	1	0	1	Yes
1336	BRCA	Female	TCGA-BH-A18Q	TCGA-BH-A18Q-11A-34R-A12D-07	TCGA-BH-A18Q-11A	NT	Solid Tissue Normal	A12D	1	1	1	0	1	Yes
1337	BRCA	Female	TCGA-A2-A1G6	TCGA-A2-A1G6-01A-11R-A13Q-07	TCGA-A2-A1G6-01A	TP	Primary solid Tumor	A13Q	1	1	1	0	1	Yes
1338	BRCA	Female	TCGA-A7-A0CE	TCGA-A7-A0CE-01A-11R-A00Z-07	TCGA-A7-A0CE-01A	TP	Primary solid Tumor	A00Z	1	1	1	0	1	Yes
1339	BRCA	Female	TCGA-A7-A0CE	TCGA-A7-A0CE-11A-21R-A089-07	TCGA-A7-A0CE-11A	NT	Solid Tissue Normal	A089	1	1	1	0	1	Yes
1340	BRCA	Female	TCGA-A7-A0CG	TCGA-A7-A0CG-01A-12R-A056-07	TCGA-A7-A0CG-01A	TP	Primary solid Tumor	A056	1	1	1	0	1	Yes
1341	BRCA	Female	TCGA-BH-A0BA	TCGA-BH-A0BA-11A-22R-A19E-07	TCGA-BH-A0BA-11A	NT	Solid Tissue Normal	A19E	1	1	1	0	1	Yes
1342	BRCA	Female	TCGA-BH-A0BC	TCGA-BH-A0BC-01A-22R-A084-07	TCGA-BH-A0BC-01A	TP	Primary solid Tumor	A084	1	1	1	0	1	Yes
1343	BRCA	Female	TCGA-GM-A3XL	TCGA-GM-A3XL-01A-11R-A22U-07	TCGA-GM-A3XL-01A	TP	Primary solid Tumor	A22U	1	1	1	0	1	Yes
1344	BRCA	Female	TCGA-A8-A09T	TCGA-A8-A09T-01A-11R-A00Z-07	TCGA-A8-A09T-01A	TP	Primary solid Tumor	A00Z	1	1	1	0	1	Yes
1345	BRCA	Female	TCGA-D8-A1JK	TCGA-D8-A1JK-01A-11R-A13Q-07	TCGA-D8-A1JK-01A	TP	Primary solid Tumor	A13Q	1	1	1	0	1	Yes
1346	BRCA	Female	TCGA-AC-A2FB	TCGA-AC-A2FB-11A-13R-A17B-07	TCGA-AC-A2FB-11A	NT	Solid Tissue Normal	A17B	1	1	1	0	1	Yes
1347	BRCA	Female	TCGA-AC-A2FB	TCGA-AC-A2FB-01A-11R-A17B-07	TCGA-AC-A2FB-01A	TP	Primary solid Tumor	A17B	1	1	1	0	1	Yes
1348	BRCA	Female	TCGA-AC-A2FE	TCGA-AC-A2FE-01A-11R-A19W-07	TCGA-AC-A2FE-01A	TP	Primary solid Tumor	A19W	1	1	1	0	1	Yes
1349	BRCA	Female	TCGA-D8-A1JN	TCGA-D8-A1JN-01A-11R-A13Q-07	TCGA-D8-A1JN-01A	TP	Primary solid Tumor	A13Q	1	1	1	0	1	Yes
1350	BRCA	Female	TCGA-AR-A1AW	TCGA-AR-A1AW-01A-21R-A12P-07	TCGA-AR-A1AW-01A	TP	Primary solid Tumor	A12P	1	1	1	0	1	Yes
1351	BRCA	Female	TCGA-AC-A2FG	TCGA-AC-A2FG-01A-11R-A17B-07	TCGA-AC-A2FG-01A	TP	Primary solid Tumor	A17B	1	1	1	0	1	Yes
1352	BRCA	Female	TCGA-AC-A2FK	TCGA-AC-A2FK-01A-12R-A180-07	TCGA-AC-A2FK-01A	TP	Primary solid Tumor	A180	1	1	1	0	1	Yes
1353	BRCA	Female	TCGA-A7-A0DC	TCGA-A7-A0DC-01B-04R-A22O-07	TCGA-A7-A0DC-01B	TP	Primary solid Tumor	A22O	0	1	0	0	1	No
1354	BRCA	Female	TCGA-A7-A13D	TCGA-A7-A13D-01B-04R-A277-07	TCGA-A7-A13D-01B	TP	Primary solid Tumor	A277	0	1	0	0	1	No
1355	BRCA	Female	TCGA-A7-A13D	TCGA-A7-A13D-01A-13R-A277-07	TCGA-A7-A13D-01A	TP	Primary solid Tumor	A277	0	1	0	0	1	No
1356	BRCA	Female	TCGA-A7-A13D	TCGA-A7-A13D-01A-13R-A12P-07	TCGA-A7-A13D-01A	TP	Primary solid Tumor	A12P	1	1	1	0	1	Yes
1357	BRCA	Female	TCGA-A7-A13E	TCGA-A7-A13E-01B-06R-A277-07	TCGA-A7-A13E-01B	TP	Primary solid Tumor	A277	0	1	0	0	1	No
1358	BRCA	Female	TCGA-A7-A13E	TCGA-A7-A13E-01A-11R-A277-07	TCGA-A7-A13E-01A	TP	Primary solid Tumor	A277	0	1	0	0	1	No
1359	BRCA	Female	TCGA-AN-A0FN	TCGA-AN-A0FN-01A-11R-A034-07	TCGA-AN-A0FN-01A	TP	Primary solid Tumor	A034	1	1	1	0	1	Yes
1360	BRCA	Female	TCGA-B6-A0RU	TCGA-B6-A0RU-01A-11R-A084-07	TCGA-B6-A0RU-01A	TP	Primary solid Tumor	A084	1	1	1	0	1	Yes
1361	BRCA	Female	TCGA-BH-A0BV	TCGA-BH-A0BV-11A-31R-A089-07	TCGA-BH-A0BV-11A	NT	Solid Tissue Normal	A089	1	1	1	0	1	Yes
1362	BRCA	Female	TCGA-BH-A0BV	TCGA-BH-A0BV-01A-11R-A00Z-07	TCGA-BH-A0BV-01A	TP	Primary solid Tumor	A00Z	1	1	1	0	1	Yes
1363	BRCA	Female	TCGA-E9-A1NE	TCGA-E9-A1NE-01A-21R-A14M-07	TCGA-E9-A1NE-01A	TP	Primary solid Tumor	A14M	1	1	1	0	1	Yes
1364	BRCA	Female	TCGA-D8-A1XK	TCGA-D8-A1XK-01A-21R-A14M-07	TCGA-D8-A1XK-01A	TP	Primary solid Tumor	A14M	1	1	1	0	1	Yes
1365	BRCA	Female	TCGA-BH-A209	TCGA-BH-A209-11A-42R-A157-07	TCGA-BH-A209-11A	NT	Solid Tissue Normal	A157	1	1	1	0	1	Yes
1366	BRCA	Female	TCGA-AN-A0FW	TCGA-AN-A0FW-01A-11R-A034-07	TCGA-AN-A0FW-01A	TP	Primary solid Tumor	A034	1	1	1	0	1	Yes
1367	BRCA	Female	TCGA-AN-A0FZ	TCGA-AN-A0FZ-01A-11R-A034-07	TCGA-AN-A0FZ-01A	TP	Primary solid Tumor	A034	1	1	1	0	1	Yes
1368	BRCA	Female	TCGA-AR-A0TV	TCGA-AR-A0TV-01A-21R-A084-07	TCGA-AR-A0TV-01A	TP	Primary solid Tumor	A084	1	1	1	0	1	Yes
1369	BRCA	Female	TCGA-A7-A26F	TCGA-A7-A26F-01B-04R-A22O-07	TCGA-A7-A26F-01B	TP	Primary solid Tumor	A22O	0	1	0	0	1	No
1370	BRCA	Female	TCGA-AR-A0TX	TCGA-AR-A0TX-01A-11R-A084-07	TCGA-AR-A0TX-01A	TP	Primary solid Tumor	A084	1	1	1	0	1	Yes
1371	BRCA	Female	TCGA-AR-A0TY	TCGA-AR-A0TY-01A-12R-A115-07	TCGA-AR-A0TY-01A	TP	Primary solid Tumor	A115	1	1	1	0	1	Yes
1372	BRCA	Female	TCGA-BH-A1FB	TCGA-BH-A1FB-11A-33R-A13Q-07	TCGA-BH-A1FB-11A	NT	Solid Tissue Normal	A13Q	1	1	1	0	1	Yes
1373	BRCA	Female	TCGA-AN-A0XR	TCGA-AN-A0XR-01A-11R-A109-07	TCGA-AN-A0XR-01A	TP	Primary solid Tumor	A109	1	1	1	0	1	Yes
1374	BRCA	Female	TCGA-AN-A0XS	TCGA-AN-A0XS-01A-22R-A109-07	TCGA-AN-A0XS-01A	TP	Primary solid Tumor	A109	1	1	1	0	1	Yes
1375	BRCA	Female	TCGA-AN-A0XT	TCGA-AN-A0XT-01A-11R-A109-07	TCGA-AN-A0XT-01A	TP	Primary solid Tumor	A109	1	1	1	0	1	Yes
1376	BRCA	Female	TCGA-A1-A0SN	TCGA-A1-A0SN-01A-11R-A144-07	TCGA-A1-A0SN-01A	TP	Primary solid Tumor	A144	1	1	1	0	1	Yes
1377	BRCA	Female	TCGA-A7-A3IY	TCGA-A7-A3IY-01A-21R-A21T-07	TCGA-A7-A3IY-01A	TP	Primary solid Tumor	A21T	1	1	1	0	1	Yes
1378	BRCA	Female	TCGA-BH-A0DH	TCGA-BH-A0DH-11A-31R-A089-07	TCGA-BH-A0DH-11A	NT	Solid Tissue Normal	A089	1	1	1	0	1	Yes
1379	BRCA	Female	TCGA-BH-A0DI	TCGA-BH-A0DI-01A-21R-A12P-07	TCGA-BH-A0DI-01A	TP	Primary solid Tumor	A12P	1	1	1	0	1	Yes
1380	BRCA	Female	TCGA-BH-A0DK	TCGA-BH-A0DK-01A-21R-A056-07	TCGA-BH-A0DK-01A	TP	Primary solid Tumor	A056	1	1	1	0	1	Yes
1381	BRCA	Female	TCGA-A7-A3IZ	TCGA-A7-A3IZ-01A-11R-A213-07	TCGA-A7-A3IZ-01A	TP	Primary solid Tumor	A213	1	1	1	0	1	Yes
1382	BRCA	Female	TCGA-AN-A0XW	TCGA-AN-A0XW-01A-11R-A109-07	TCGA-AN-A0XW-01A	TP	Primary solid Tumor	A109	1	1	1	0	1	Yes
1383	BRCA	Female	TCGA-BH-A18T	TCGA-BH-A18T-01A-11R-A12D-07	TCGA-BH-A18T-01A	TP	Primary solid Tumor	A12D	1	1	1	0	1	Yes
1384	BRCA	Female	TCGA-GM-A3XN	TCGA-GM-A3XN-01A-12R-A22U-07	TCGA-GM-A3XN-01A	TP	Primary solid Tumor	A22U	1	1	1	0	1	Yes
1385	BRCA	Female	TCGA-GM-A4E0	TCGA-GM-A4E0-01A-12R-A266-07	TCGA-GM-A4E0-01A	TP	Primary solid Tumor	A266	1	1	1	0	1	Yes
1386	BRCA	Female	TCGA-GM-A5PV	TCGA-GM-A5PV-01A-11R-A28M-07	TCGA-GM-A5PV-01A	TP	Primary solid Tumor	A28M	1	1	1	0	1	Yes
1387	BRCA	Female	TCGA-PE-A5DD	TCGA-PE-A5DD-01A-12R-A27Q-07	TCGA-PE-A5DD-01A	TP	Primary solid Tumor	A27Q	1	1	1	0	1	Yes
1388	BRCA	Female	TCGA-BH-A0DQ	TCGA-BH-A0DQ-01A-11R-A084-07	TCGA-BH-A0DQ-01A	TP	Primary solid Tumor	A084	1	1	1	0	1	Yes
1389	BRCA	Female	TCGA-AR-A1AV	TCGA-AR-A1AV-01A-21R-A12P-07	TCGA-AR-A1AV-01A	TP	Primary solid Tumor	A12P	1	1	1	0	1	Yes
1390	BRCA	Female	TCGA-B6-A0IQ	TCGA-B6-A0IQ-01A-11R-A034-07	TCGA-B6-A0IQ-01A	TP	Primary solid Tumor	A034	1	1	1	0	1	Yes
1391	BRCA	Female	TCGA-A2-A0CL	TCGA-A2-A0CL-01A-11R-A115-07	TCGA-A2-A0CL-01A	TP	Primary solid Tumor	A115	1	1	1	0	1	Yes
1392	BRCA	Female	TCGA-A2-A0CM	TCGA-A2-A0CM-01A-31R-A034-07	TCGA-A2-A0CM-01A	TP	Primary solid Tumor	A034	1	1	1	0	1	Yes
1393	BRCA	Female	TCGA-E9-A1N9	TCGA-E9-A1N9-01A-11R-A14D-07	TCGA-E9-A1N9-01A	TP	Primary solid Tumor	A14D	1	1	1	0	1	Yes
1394	BRCA	Female	TCGA-A2-A0CQ	TCGA-A2-A0CQ-01A-21R-A034-07	TCGA-A2-A0CQ-01A	TP	Primary solid Tumor	A034	1	1	1	0	1	Yes
1395	BRCA	Female	TCGA-E2-A15R	TCGA-E2-A15R-01A-11R-A115-07	TCGA-E2-A15R-01A	TP	Primary solid Tumor	A115	1	1	1	0	1	Yes
1396	BRCA	Female	TCGA-A2-A0CS	TCGA-A2-A0CS-01A-11R-A115-07	TCGA-A2-A0CS-01A	TP	Primary solid Tumor	A115	1	1	1	0	1	Yes
1397	BRCA	Female	TCGA-AO-A0JC	TCGA-AO-A0JC-01A-11R-A056-07	TCGA-AO-A0JC-01A	TP	Primary solid Tumor	A056	1	1	1	0	1	Yes
1398	BRCA	Female	TCGA-A8-A06N	TCGA-A8-A06N-01A-11R-A00Z-07	TCGA-A8-A06N-01A	TP	Primary solid Tumor	A00Z	1	1	1	0	1	Yes
1399	BRCA	Female	TCGA-A8-A06O	TCGA-A8-A06O-01A-11R-A00Z-07	TCGA-A8-A06O-01A	TP	Primary solid Tumor	A00Z	1	1	1	0	1	Yes
1400	BRCA	Female	TCGA-BH-A0BT	TCGA-BH-A0BT-11A-21R-A12P-07	TCGA-BH-A0BT-11A	NT	Solid Tissue Normal	A12P	1	1	1	0	1	Yes
1401	BRCA	Female	TCGA-AR-A24Q	TCGA-AR-A24Q-01A-12R-A169-07	TCGA-AR-A24Q-01A	TP	Primary solid Tumor	A169	1	1	1	0	1	Yes
1402	BRCA	Female	TCGA-AR-A24R	TCGA-AR-A24R-01A-11R-A169-07	TCGA-AR-A24R-01A	TP	Primary solid Tumor	A169	1	1	1	0	1	Yes
1403	BRCA	Female	TCGA-BH-A0BW	TCGA-BH-A0BW-11A-12R-A115-07	TCGA-BH-A0BW-11A	NT	Solid Tissue Normal	A115	1	1	1	0	1	Yes
1404	BRCA	Female	TCGA-E9-A1NF	TCGA-E9-A1NF-01A-11R-A14D-07	TCGA-E9-A1NF-01A	TP	Primary solid Tumor	A14D	1	1	1	0	1	Yes
1405	BRCA	Female	TCGA-BH-A0BZ	TCGA-BH-A0BZ-11A-61R-A12P-07	TCGA-BH-A0BZ-11A	NT	Solid Tissue Normal	A12P	1	1	1	0	1	Yes
1406	BRCA	Female	TCGA-A8-A06T	TCGA-A8-A06T-01A-11R-A00Z-07	TCGA-A8-A06T-01A	TP	Primary solid Tumor	A00Z	1	1	1	0	1	Yes
1407	BRCA	Female	TCGA-BH-A0C0	TCGA-BH-A0C0-11A-21R-A089-07	TCGA-BH-A0C0-11A	NT	Solid Tissue Normal	A089	1	1	1	0	1	Yes
1408	BRCA	Female	TCGA-AN-A0FX	TCGA-AN-A0FX-01A-11R-A034-07	TCGA-AN-A0FX-01A	TP	Primary solid Tumor	A034	1	1	1	0	1	Yes
1409	BRCA	Female	TCGA-AR-A0TW	TCGA-AR-A0TW-01A-11R-A084-07	TCGA-AR-A0TW-01A	TP	Primary solid Tumor	A084	1	1	1	0	1	Yes
1410	BRCA	Female	TCGA-BH-A1F6	TCGA-BH-A1F6-11B-94R-A13Q-07	TCGA-BH-A1F6-11B	NT	Solid Tissue Normal	A13Q	1	1	1	0	1	Yes
1411	BRCA	Female	TCGA-BH-A1F6	TCGA-BH-A1F6-01A-11R-A13Q-07	TCGA-BH-A1F6-01A	TP	Primary solid Tumor	A13Q	1	1	1	0	1	Yes
1412	BRCA	Female	TCGA-E9-A3HO	TCGA-E9-A3HO-01A-11R-A213-07	TCGA-E9-A3HO-01A	TP	Primary solid Tumor	A213	1	1	1	0	1	Yes
1413	BRCA	Female	TCGA-D8-A147	TCGA-D8-A147-01A-11R-A115-07	TCGA-D8-A147-01A	TP	Primary solid Tumor	A115	1	1	1	0	1	Yes
1414	BRCA	Female	TCGA-E9-A3QA	TCGA-E9-A3QA-01A-61R-A22K-07	TCGA-E9-A3QA-01A	TP	Primary solid Tumor	A22K	1	1	1	0	1	Yes
1415	BRCA	Female	TCGA-GM-A2DH	TCGA-GM-A2DH-01A-11R-A180-07	TCGA-GM-A2DH-01A	TP	Primary solid Tumor	A180	1	1	1	0	1	Yes
1416	BRCA	Female	TCGA-A8-A07I	TCGA-A8-A07I-01A-11R-A00Z-07	TCGA-A8-A07I-01A	TP	Primary solid Tumor	A00Z	1	1	1	0	1	Yes
1417	BRCA	Female	TCGA-A8-A07J	TCGA-A8-A07J-01A-11R-A00Z-07	TCGA-A8-A07J-01A	TP	Primary solid Tumor	A00Z	1	1	1	0	1	Yes
1418	BRCA	Female	TCGA-A8-A07L	TCGA-A8-A07L-01A-11R-A00Z-07	TCGA-A8-A07L-01A	TP	Primary solid Tumor	A00Z	1	1	1	0	1	Yes
1419	BRCA	Female	TCGA-BH-A5J0	TCGA-BH-A5J0-01A-11R-A27Q-07	TCGA-BH-A5J0-01A	TP	Primary solid Tumor	A27Q	1	1	1	0	1	Yes
1420	BRCA	Female	TCGA-A8-A07P	TCGA-A8-A07P-01A-11R-A00Z-07	TCGA-A8-A07P-01A	TP	Primary solid Tumor	A00Z	1	1	1	0	1	Yes
1421	BRCA	Female	TCGA-GM-A3NY	TCGA-GM-A3NY-01A-11R-A21T-07	TCGA-GM-A3NY-01A	TP	Primary solid Tumor	A21T	1	1	1	0	1	Yes
1422	BRCA	Female	TCGA-GM-A3XG	TCGA-GM-A3XG-01A-31R-A24H-07	TCGA-GM-A3XG-01A	TP	Primary solid Tumor	A24H	1	1	1	0	1	Yes
1423	BRCA	Female	TCGA-B6-A0IH	TCGA-B6-A0IH-01A-11R-A115-07	TCGA-B6-A0IH-01A	TP	Primary solid Tumor	A115	1	1	1	0	1	Yes
1424	BRCA	Female	TCGA-A2-A25D	TCGA-A2-A25D-01A-12R-A16F-07	TCGA-A2-A25D-01A	TP	Primary solid Tumor	A16F	1	1	1	0	1	Yes
1425	BRCA	Female	TCGA-D8-A1JI	TCGA-D8-A1JI-01A-11R-A13Q-07	TCGA-D8-A1JI-01A	TP	Primary solid Tumor	A13Q	1	1	1	0	1	Yes
1426	BRCA	Female	TCGA-D8-A1JJ	TCGA-D8-A1JJ-01A-31R-A14M-07	TCGA-D8-A1JJ-01A	TP	Primary solid Tumor	A14M	1	1	1	0	1	Yes
1427	BRCA	Female	TCGA-LL-A50Y	TCGA-LL-A50Y-01A-11R-A266-07	TCGA-LL-A50Y-01A	TP	Primary solid Tumor	A266	1	1	1	0	1	Yes
1428	BRCA	Female	TCGA-WT-AB41	TCGA-WT-AB41-01A-11R-A41B-07	TCGA-WT-AB41-01A	TP	Primary solid Tumor	A41B	1	1	1	0	1	Yes
1429	BRCA	Female	TCGA-OL-A5RZ	TCGA-OL-A5RZ-01A-11R-A28M-07	TCGA-OL-A5RZ-01A	TP	Primary solid Tumor	A28M	1	1	1	0	1	Yes
1430	BRCA	Female	TCGA-OL-A5S0	TCGA-OL-A5S0-01A-11R-A28M-07	TCGA-OL-A5S0-01A	TP	Primary solid Tumor	A28M	1	1	1	0	1	Yes
1431	BRCA	Female	TCGA-OL-A66H	TCGA-OL-A66H-01A-11R-A29R-07	TCGA-OL-A66H-01A	TP	Primary solid Tumor	A29R	1	1	1	0	1	Yes
1432	BRCA	Female	TCGA-BH-A0HW	TCGA-BH-A0HW-01A-11R-A034-07	TCGA-BH-A0HW-01A	TP	Primary solid Tumor	A034	1	1	1	0	1	Yes
1433	BRCA	Female	TCGA-E9-A1RI	TCGA-E9-A1RI-11A-41R-A169-07	TCGA-E9-A1RI-11A	NT	Solid Tissue Normal	A169	1	1	1	0	1	Yes
1434	BRCA	Female	TCGA-AC-A2FM	TCGA-AC-A2FM-01A-11R-A19W-07	TCGA-AC-A2FM-01A	TP	Primary solid Tumor	A19W	1	1	1	0	1	Yes
1435	BRCA	Female	TCGA-E9-A228	TCGA-E9-A228-01A-31R-A157-07	TCGA-E9-A228-01A	TP	Primary solid Tumor	A157	1	1	1	0	1	Yes
1436	BRCA	Female	TCGA-BH-A0W3	TCGA-BH-A0W3-01A-11R-A109-07	TCGA-BH-A0W3-01A	TP	Primary solid Tumor	A109	1	1	1	0	1	Yes
1437	BRCA	Female	TCGA-B6-A0RQ	TCGA-B6-A0RQ-01A-11R-A115-07	TCGA-B6-A0RQ-01A	TP	Primary solid Tumor	A115	1	1	1	0	1	Yes
1438	BRCA	Female	TCGA-B6-A0RS	TCGA-B6-A0RS-01A-11R-A084-07	TCGA-B6-A0RS-01A	TP	Primary solid Tumor	A084	1	1	1	0	1	Yes
1439	BRCA	Female	TCGA-B6-A0RT	TCGA-B6-A0RT-01A-21R-A084-07	TCGA-B6-A0RT-01A	TP	Primary solid Tumor	A084	1	1	1	0	1	Yes
1440	BRCA	Female	TCGA-AR-A24P	TCGA-AR-A24P-01A-11R-A169-07	TCGA-AR-A24P-01A	TP	Primary solid Tumor	A169	1	1	1	0	1	Yes
1441	BRCA	Female	TCGA-E9-A22E	TCGA-E9-A22E-01A-11R-A157-07	TCGA-E9-A22E-01A	TP	Primary solid Tumor	A157	1	1	1	0	1	Yes
1442	BRCA	Female	TCGA-E2-A14Q	TCGA-E2-A14Q-01A-11R-A12D-07	TCGA-E2-A14Q-01A	TP	Primary solid Tumor	A12D	1	1	1	0	1	Yes
1443	BRCA	Female	TCGA-E2-A1B4	TCGA-E2-A1B4-01A-11R-A12P-07	TCGA-E2-A1B4-01A	TP	Primary solid Tumor	A12P	1	1	1	0	1	Yes
1444	BRCA	Female	TCGA-BH-A0BW	TCGA-BH-A0BW-01A-11R-A115-07	TCGA-BH-A0BW-01A	TP	Primary solid Tumor	A115	1	1	1	0	1	Yes
1445	BRCA	Female	TCGA-E9-A1NF	TCGA-E9-A1NF-11A-73R-A14D-07	TCGA-E9-A1NF-11A	NT	Solid Tissue Normal	A14D	1	1	1	0	1	Yes
1446	BRCA	Female	TCGA-AR-A0TR	TCGA-AR-A0TR-01A-11R-A084-07	TCGA-AR-A0TR-01A	TP	Primary solid Tumor	A084	1	1	1	0	1	Yes
1447	BRCA	Female	TCGA-AR-A0TS	TCGA-AR-A0TS-01A-11R-A115-07	TCGA-AR-A0TS-01A	TP	Primary solid Tumor	A115	1	1	1	0	1	Yes
1448	BRCA	Female	TCGA-AN-A0FV	TCGA-AN-A0FV-01A-11R-A00Z-07	TCGA-AN-A0FV-01A	TP	Primary solid Tumor	A00Z	1	1	1	0	1	Yes
1449	BRCA	Female	TCGA-BH-A1F5	TCGA-BH-A1F5-01A-12R-A13Q-07	TCGA-BH-A1F5-01A	TP	Primary solid Tumor	A13Q	1	1	1	0	1	Yes
1450	BRCA	Female	TCGA-AN-A0FY	TCGA-AN-A0FY-01A-11R-A034-07	TCGA-AN-A0FY-01A	TP	Primary solid Tumor	A034	1	1	1	0	1	Yes
1451	BRCA	Female	TCGA-A7-A26E	TCGA-A7-A26E-01B-06R-A277-07	TCGA-A7-A26E-01B	TP	Primary solid Tumor	A277	0	1	0	0	1	No
1452	BRCA	Female	TCGA-AR-A0TZ	TCGA-AR-A0TZ-01A-12R-A084-07	TCGA-AR-A0TZ-01A	TP	Primary solid Tumor	A084	1	1	1	0	1	Yes
1453	BRCA	Female	TCGA-A7-A26I	TCGA-A7-A26I-01B-06R-A22O-07	TCGA-A7-A26I-01B	TP	Primary solid Tumor	A22O	0	1	0	0	1	No
1454	BRCA	Female	TCGA-AR-A0U2	TCGA-AR-A0U2-01A-11R-A109-07	TCGA-AR-A0U2-01A	TP	Primary solid Tumor	A109	1	1	1	0	1	Yes
1455	BRCA	Female	TCGA-B6-A1KC	TCGA-B6-A1KC-01B-11R-A157-07	TCGA-B6-A1KC-01B	TP	Primary solid Tumor	A157	1	1	1	0	1	Yes
1456	BRCA	Female	TCGA-B6-A1KN	TCGA-B6-A1KN-01A-11R-A13Q-07	TCGA-B6-A1KN-01A	TP	Primary solid Tumor	A13Q	1	1	1	0	1	Yes
1457	BRCA	Female	TCGA-A2-A1G4	TCGA-A2-A1G4-01A-11R-A13Q-07	TCGA-A2-A1G4-01A	TP	Primary solid Tumor	A13Q	1	1	1	0	1	Yes
1458	BRCA	Female	TCGA-BH-A18Q	TCGA-BH-A18Q-01A-12R-A12D-07	TCGA-BH-A18Q-01A	TP	Primary solid Tumor	A12D	1	1	1	0	1	Yes
1459	BRCA	Female	TCGA-A2-A259	TCGA-A2-A259-01A-11R-A16F-07	TCGA-A2-A259-01A	TP	Primary solid Tumor	A16F	1	1	1	0	1	Yes
1460	BRCA	Female	TCGA-A2-A25A	TCGA-A2-A25A-01A-12R-A16F-07	TCGA-A2-A25A-01A	TP	Primary solid Tumor	A16F	1	1	1	0	1	Yes
1461	BRCA	Female	TCGA-A2-A25B	TCGA-A2-A25B-01A-11R-A169-07	TCGA-A2-A25B-01A	TP	Primary solid Tumor	A169	1	1	1	0	1	Yes
1462	BRCA	Female	TCGA-BH-A18S	TCGA-BH-A18S-11A-43R-A12D-07	TCGA-BH-A18S-11A	NT	Solid Tissue Normal	A12D	1	1	1	0	1	Yes
1463	BRCA	Female	TCGA-E9-A5UP	TCGA-E9-A5UP-01A-11R-A28M-07	TCGA-E9-A5UP-01A	TP	Primary solid Tumor	A28M	1	1	1	0	1	Yes
1464	BRCA	Female	TCGA-AR-A2LQ	TCGA-AR-A2LQ-01A-22R-A18M-07	TCGA-AR-A2LQ-01A	TP	Primary solid Tumor	A18M	1	1	1	0	1	Yes
1465	BRCA	Female	TCGA-AR-A2LN	TCGA-AR-A2LN-01A-21R-A18M-07	TCGA-AR-A2LN-01A	TP	Primary solid Tumor	A18M	1	1	1	0	1	Yes
1466	BRCA	Female	TCGA-AR-A5QN	TCGA-AR-A5QN-01A-12R-A28M-07	TCGA-AR-A5QN-01A	TP	Primary solid Tumor	A28M	1	1	1	0	1	Yes
1467	BRCA	Female	TCGA-B6-A40B	TCGA-B6-A40B-01A-11R-A239-07	TCGA-B6-A40B-01A	TP	Primary solid Tumor	A239	1	1	1	0	1	Yes
1468	BRCA	Female	TCGA-B6-A40C	TCGA-B6-A40C-01A-11R-A239-07	TCGA-B6-A40C-01A	TP	Primary solid Tumor	A239	1	1	1	0	1	Yes
1469	BRCA	Female	TCGA-PE-A5DE	TCGA-PE-A5DE-01A-11R-A27Q-07	TCGA-PE-A5DE-01A	TP	Primary solid Tumor	A27Q	1	1	1	0	1	Yes
1470	BRCA	Female	TCGA-AO-A03U	TCGA-AO-A03U-01B-21R-A10J-07	TCGA-AO-A03U-01B	TP	Primary solid Tumor	A10J	1	1	1	0	1	Yes
1471	BRCA	Female	TCGA-AO-A03V	TCGA-AO-A03V-01A-11R-A115-07	TCGA-AO-A03V-01A	TP	Primary solid Tumor	A115	1	1	1	0	1	Yes
1472	BRCA	Female	TCGA-OL-A66I	TCGA-OL-A66I-01A-21R-A29R-07	TCGA-OL-A66I-01A	TP	Primary solid Tumor	A29R	1	1	1	0	1	Yes
1473	BRCA	Female	TCGA-OL-A66J	TCGA-OL-A66J-01A-11R-A29R-07	TCGA-OL-A66J-01A	TP	Primary solid Tumor	A29R	1	1	1	0	1	Yes
1474	BRCA	Female	TCGA-BH-A0DV	TCGA-BH-A0DV-11A-22R-A12P-07	TCGA-BH-A0DV-11A	NT	Solid Tissue Normal	A12P	1	1	1	0	1	Yes
1475	BRCA	Female	TCGA-BH-A0BQ	TCGA-BH-A0BQ-11A-33R-A115-07	TCGA-BH-A0BQ-11A	NT	Solid Tissue Normal	A115	1	1	1	0	1	Yes
1476	BRCA	Female	TCGA-BH-A0BQ	TCGA-BH-A0BQ-01A-21R-A115-07	TCGA-BH-A0BQ-01A	TP	Primary solid Tumor	A115	1	1	1	0	1	Yes
1477	BRCA	Female	TCGA-BH-A0BR	TCGA-BH-A0BR-01A-21R-A115-07	TCGA-BH-A0BR-01A	TP	Primary solid Tumor	A115	1	1	1	0	1	Yes
1478	BRCA	Female	TCGA-BH-A0BS	TCGA-BH-A0BS-11A-11R-A12P-07	TCGA-BH-A0BS-11A	NT	Solid Tissue Normal	A12P	1	1	1	0	1	Yes
1479	BRCA	Female	TCGA-BH-A0BT	TCGA-BH-A0BT-01A-11R-A12P-07	TCGA-BH-A0BT-01A	TP	Primary solid Tumor	A12P	1	1	1	0	1	Yes
1480	BRCA	Female	TCGA-A2-A0T6	TCGA-A2-A0T6-01A-11R-A084-07	TCGA-A2-A0T6-01A	TP	Primary solid Tumor	A084	1	1	1	0	1	Yes
1481	BRCA	Female	TCGA-E2-A14P	TCGA-E2-A14P-01A-31R-A12D-07	TCGA-E2-A14P-01A	TP	Primary solid Tumor	A12D	1	1	1	0	1	Yes
1482	BRCA	Female	TCGA-E2-A1B0	TCGA-E2-A1B0-01A-11R-A12P-07	TCGA-E2-A1B0-01A	TP	Primary solid Tumor	A12P	1	1	1	0	1	Yes
1483	BRCA	Female	TCGA-LQ-A4E4	TCGA-LQ-A4E4-01A-11R-A266-07	TCGA-LQ-A4E4-01A	TP	Primary solid Tumor	A266	1	1	1	0	1	Yes
1484	BRCA	Female	TCGA-AR-A0TQ	TCGA-AR-A0TQ-01A-11R-A084-07	TCGA-AR-A0TQ-01A	TP	Primary solid Tumor	A084	1	1	1	0	1	Yes
1485	BRCA	Female	TCGA-A2-A4S3	TCGA-A2-A4S3-01A-21R-A266-07	TCGA-A2-A4S3-01A	TP	Primary solid Tumor	A266	1	1	1	0	1	Yes
1486	BRCA	Female	TCGA-GM-A2DL	TCGA-GM-A2DL-01A-11R-A18M-07	TCGA-GM-A2DL-01A	TP	Primary solid Tumor	A18M	1	1	1	0	1	Yes
1487	BRCA	Female	TCGA-E2-A1B5	TCGA-E2-A1B5-01A-21R-A12P-07	TCGA-E2-A1B5-01A	TP	Primary solid Tumor	A12P	1	1	1	0	1	Yes
1488	BRCA	Female	TCGA-AN-A0XV	TCGA-AN-A0XV-01A-11R-A109-07	TCGA-AN-A0XV-01A	TP	Primary solid Tumor	A109	1	1	1	0	1	Yes
1489	BRCA	Female	TCGA-AR-A0TT	TCGA-AR-A0TT-01A-31R-A084-07	TCGA-AR-A0TT-01A	TP	Primary solid Tumor	A084	1	1	1	0	1	Yes
1490	BRCA	Female	TCGA-A7-A13G	TCGA-A7-A13G-01B-04R-A22O-07	TCGA-A7-A13G-01B	TP	Primary solid Tumor	A22O	0	1	0	0	1	No
1491	BRCA	Female	TCGA-AR-A0TU	TCGA-AR-A0TU-01A-31R-A109-07	TCGA-AR-A0TU-01A	TP	Primary solid Tumor	A109	1	1	1	0	1	Yes
1492	BRCA	Female	TCGA-E2-A152	TCGA-E2-A152-01A-11R-A12D-07	TCGA-E2-A152-01A	TP	Primary solid Tumor	A12D	1	1	1	0	1	Yes
1493	BRCA	Female	TCGA-B6-A0X1	TCGA-B6-A0X1-01A-11R-A109-07	TCGA-B6-A0X1-01A	TP	Primary solid Tumor	A109	1	1	1	0	1	Yes
1494	BRCA	Female	TCGA-E9-A3Q9	TCGA-E9-A3Q9-01A-11R-A21T-07	TCGA-E9-A3Q9-01A	TP	Primary solid Tumor	A21T	1	1	1	0	1	Yes
1495	BRCA	Female	TCGA-BH-A0DE	TCGA-BH-A0DE-01A-11R-A115-07	TCGA-BH-A0DE-01A	TP	Primary solid Tumor	A115	1	1	1	0	1	Yes
1496	BRCA	Female	TCGA-BH-A0DG	TCGA-BH-A0DG-11A-43R-A12P-07	TCGA-BH-A0DG-11A	NT	Solid Tissue Normal	A12P	1	1	1	0	1	Yes
1497	BRCA	Female	TCGA-BH-A0DG	TCGA-BH-A0DG-01A-21R-A12P-07	TCGA-BH-A0DG-01A	TP	Primary solid Tumor	A12P	1	1	1	0	1	Yes
1498	BRCA	Female	TCGA-BH-A0DH	TCGA-BH-A0DH-01A-11R-A084-07	TCGA-BH-A0DH-01A	TP	Primary solid Tumor	A084	1	1	1	0	1	Yes
1499	BRCA	Female	TCGA-AR-A1AX	TCGA-AR-A1AX-01A-11R-A12P-07	TCGA-AR-A1AX-01A	TP	Primary solid Tumor	A12P	1	1	1	0	1	Yes
1500	BRCA	Female	TCGA-AN-A0XU	TCGA-AN-A0XU-01A-11R-A109-07	TCGA-AN-A0XU-01A	TP	Primary solid Tumor	A109	1	1	1	0	1	Yes
1501	BRCA	Female	TCGA-AQ-A04H	TCGA-AQ-A04H-01B-11R-A10J-07	TCGA-AQ-A04H-01B	TP	Primary solid Tumor	A10J	1	1	1	0	1	Yes
1502	BRCA	Female	TCGA-BH-A6R9	TCGA-BH-A6R9-01A-21R-A32P-07	TCGA-BH-A6R9-01A	TP	Primary solid Tumor	A32P	1	1	1	0	1	Yes
1503	BRCA	Female	TCGA-GM-A2DO	TCGA-GM-A2DO-01A-11R-A18M-07	TCGA-GM-A2DO-01A	TP	Primary solid Tumor	A18M	1	1	1	0	1	Yes
1504	BRCA	Female	TCGA-A2-A25C	TCGA-A2-A25C-01A-11R-A169-07	TCGA-A2-A25C-01A	TP	Primary solid Tumor	A169	1	1	1	0	1	Yes
1505	BRCA	Female	TCGA-UU-A93S	TCGA-UU-A93S-01A-21R-A41B-07	TCGA-UU-A93S-01A	TP	Primary solid Tumor	A41B	1	1	1	0	1	Yes
1506	BRCA	Female	TCGA-A2-A25E	TCGA-A2-A25E-01A-11R-A169-07	TCGA-A2-A25E-01A	TP	Primary solid Tumor	A169	1	1	1	0	1	Yes
1507	BRCA	Female	TCGA-E2-A1LB	TCGA-E2-A1LB-11A-22R-A144-07	TCGA-E2-A1LB-11A	NT	Solid Tissue Normal	A144	1	1	1	0	1	Yes
1508	BRCA	Female	TCGA-PE-A5DC	TCGA-PE-A5DC-01A-12R-A27Q-07	TCGA-PE-A5DC-01A	TP	Primary solid Tumor	A27Q	1	1	1	0	1	Yes
1509	BRCA	Female	TCGA-A2-A3KD	TCGA-A2-A3KD-01A-12R-A213-07	TCGA-A2-A3KD-01A	TP	Primary solid Tumor	A213	1	1	1	0	1	Yes
1510	BRCA	Female	TCGA-A2-A3XS	TCGA-A2-A3XS-01A-11R-A22U-07	TCGA-A2-A3XS-01A	TP	Primary solid Tumor	A22U	1	1	1	0	1	Yes
1511	BRCA	Female	TCGA-BH-A0HN	TCGA-BH-A0HN-01A-11R-A10U-07	TCGA-BH-A0HN-01A	TP	Primary solid Tumor	A10U	1	1	1	0	1	Yes
1512	BRCA	Female	TCGA-D8-A1XA	TCGA-D8-A1XA-01A-11R-A14D-07	TCGA-D8-A1XA-01A	TP	Primary solid Tumor	A14D	1	1	1	0	1	Yes
1513	BRCA	Female	TCGA-AR-A1AY	TCGA-AR-A1AY-01A-21R-A12P-07	TCGA-AR-A1AY-01A	TP	Primary solid Tumor	A12P	1	1	1	0	1	Yes
1514	BRCA	Female	TCGA-AN-A0FT	TCGA-AN-A0FT-01A-11R-A034-07	TCGA-AN-A0FT-01A	TP	Primary solid Tumor	A034	1	1	1	0	1	Yes
1515	BRCA	Female	TCGA-BH-A0DV	TCGA-BH-A0DV-01A-21R-A12P-07	TCGA-BH-A0DV-01A	TP	Primary solid Tumor	A12P	1	1	1	0	1	Yes
1516	BRCA	Female	TCGA-BH-A0DX	TCGA-BH-A0DX-01A-11R-A115-07	TCGA-BH-A0DX-01A	TP	Primary solid Tumor	A115	1	1	1	0	1	Yes
1517	BRCA	Female	TCGA-AR-A24M	TCGA-AR-A24M-01A-11R-A169-07	TCGA-AR-A24M-01A	TP	Primary solid Tumor	A169	1	1	1	0	1	Yes
1518	BRCA	Female	TCGA-AR-A24N	TCGA-AR-A24N-01A-11R-A169-07	TCGA-AR-A24N-01A	TP	Primary solid Tumor	A169	1	1	1	0	1	Yes
1519	BRCA	Female	TCGA-AR-A24O	TCGA-AR-A24O-01A-11R-A169-07	TCGA-AR-A24O-01A	TP	Primary solid Tumor	A169	1	1	1	0	1	Yes
1520	BRCA	Female	TCGA-E2-A14O	TCGA-E2-A14O-01A-31R-A115-07	TCGA-E2-A14O-01A	TP	Primary solid Tumor	A115	1	1	1	0	1	Yes
1521	BRCA	Female	TCGA-BH-A201	TCGA-BH-A201-01A-11R-A14M-07	TCGA-BH-A201-01A	TP	Primary solid Tumor	A14M	1	1	1	0	1	Yes
1522	BRCA	Female	TCGA-BH-A0W7	TCGA-BH-A0W7-01A-11R-A115-07	TCGA-BH-A0W7-01A	TP	Primary solid Tumor	A115	1	1	1	0	1	Yes
1523	BRCA	Female	TCGA-E2-A1B1	TCGA-E2-A1B1-01A-21R-A12P-07	TCGA-E2-A1B1-01A	TP	Primary solid Tumor	A12P	1	1	1	0	1	Yes
1524	BRCA	Female	TCGA-A8-A06Q	TCGA-A8-A06Q-01A-11R-A034-07	TCGA-A8-A06Q-01A	TP	Primary solid Tumor	A034	1	1	1	0	1	Yes
1525	BRCA	Female	TCGA-AR-A2LH	TCGA-AR-A2LH-01A-31R-A18M-07	TCGA-AR-A2LH-01A	TP	Primary solid Tumor	A18M	1	1	1	0	1	Yes
1526	BRCA	Female	TCGA-W8-A86G	TCGA-W8-A86G-01A-21R-A36F-07	TCGA-W8-A86G-01A	TP	Primary solid Tumor	A36F	1	1	1	0	1	Yes
1527	BRCA	Female	TCGA-GM-A2DM	TCGA-GM-A2DM-01A-11R-A180-07	TCGA-GM-A2DM-01A	TP	Primary solid Tumor	A180	1	1	1	0	1	Yes
1528	BRCA	Female	TCGA-S3-A6ZH	TCGA-S3-A6ZH-01A-22R-A32P-07	TCGA-S3-A6ZH-01A	TP	Primary solid Tumor	A32P	1	1	1	0	1	Yes
1529	BRCA	Female	TCGA-C8-A12P	TCGA-C8-A12P-01A-11R-A115-07	TCGA-C8-A12P-01A	TP	Primary solid Tumor	A115	1	1	1	0	1	Yes
1530	BRCA	Female	TCGA-A7-A13F	TCGA-A7-A13F-01A-11R-A12P-07	TCGA-A7-A13F-01A	TP	Primary solid Tumor	A12P	1	1	1	0	1	Yes
1531	BRCA	Female	TCGA-C8-A12Q	TCGA-C8-A12Q-01A-11R-A115-07	TCGA-C8-A12Q-01A	TP	Primary solid Tumor	A115	1	1	1	0	1	Yes
1532	BRCA	Female	TCGA-D8-A1XM	TCGA-D8-A1XM-01A-21R-A14M-07	TCGA-D8-A1XM-01A	TP	Primary solid Tumor	A14M	1	1	1	0	1	Yes
1533	BRCA	Female	TCGA-BH-A1F8	TCGA-BH-A1F8-01A-11R-A13Q-07	TCGA-BH-A1F8-01A	TP	Primary solid Tumor	A13Q	1	1	1	0	1	Yes
1534	BRCA	Female	TCGA-AR-A0U0	TCGA-AR-A0U0-01A-11R-A109-07	TCGA-AR-A0U0-01A	TP	Primary solid Tumor	A109	1	1	1	0	1	Yes
1535	BRCA	Female	TCGA-B6-A0X7	TCGA-B6-A0X7-01A-11R-A10J-07	TCGA-B6-A0X7-01A	TP	Primary solid Tumor	A10J	1	1	1	0	1	Yes
1536	BRCA	Female	TCGA-BH-A18N	TCGA-BH-A18N-11A-43R-A12D-07	TCGA-BH-A18N-11A	NT	Solid Tissue Normal	A12D	1	1	1	0	1	Yes
1537	BRCA	Female	TCGA-A8-A07F	TCGA-A8-A07F-01A-11R-A00Z-07	TCGA-A8-A07F-01A	TP	Primary solid Tumor	A00Z	1	1	1	0	1	Yes
1538	BRCA	Female	TCGA-A2-A3XT	TCGA-A2-A3XT-01A-11R-A22U-07	TCGA-A2-A3XT-01A	TP	Primary solid Tumor	A22U	1	1	1	0	1	Yes
1539	BRCA	Female	TCGA-A2-A3XU	TCGA-A2-A3XU-01A-12R-A22U-07	TCGA-A2-A3XU-01A	TP	Primary solid Tumor	A22U	1	1	1	0	1	Yes
1540	BRCA	Female	TCGA-A2-A3XV	TCGA-A2-A3XV-01A-21R-A239-07	TCGA-A2-A3XV-01A	TP	Primary solid Tumor	A239	1	1	1	0	1	Yes
1541	BRCA	Female	TCGA-E9-A1N8	TCGA-E9-A1N8-01A-11R-A144-07	TCGA-E9-A1N8-01A	TP	Primary solid Tumor	A144	1	1	1	0	1	Yes
1542	BRCA	Female	TCGA-OL-A5D7	TCGA-OL-A5D7-01A-11R-A27Q-07	TCGA-OL-A5D7-01A	TP	Primary solid Tumor	A27Q	1	1	1	0	1	Yes
1543	BRCA	Female	TCGA-E9-A5UO	TCGA-E9-A5UO-01A-11R-A28M-07	TCGA-E9-A5UO-01A	TP	Primary solid Tumor	A28M	1	1	1	0	1	Yes
1544	BRCA	Female	TCGA-BH-A8FY	TCGA-BH-A8FY-01A-11R-A36F-07	TCGA-BH-A8FY-01A	TP	Primary solid Tumor	A36F	1	1	1	0	1	Yes
1545	BRCA	Female	TCGA-S3-AA12	TCGA-S3-AA12-01A-11R-A41B-07	TCGA-S3-AA12-01A	TP	Primary solid Tumor	A41B	1	1	1	0	1	Yes
1546	BRCA	Female	TCGA-S3-AA14	TCGA-S3-AA14-01A-11R-A41B-07	TCGA-S3-AA14-01A	TP	Primary solid Tumor	A41B	1	1	1	0	1	Yes
1547	BRCA	Female	TCGA-A2-A25F	TCGA-A2-A25F-01A-11R-A169-07	TCGA-A2-A25F-01A	TP	Primary solid Tumor	A169	1	1	1	0	1	Yes
1548	BRCA	Female	TCGA-LL-A442	TCGA-LL-A442-01A-11R-A24H-07	TCGA-LL-A442-01A	TP	Primary solid Tumor	A24H	1	1	1	0	1	Yes
1549	BRCA	Female	TCGA-BH-AB28	TCGA-BH-AB28-01A-31R-A41B-07	TCGA-BH-AB28-01A	TP	Primary solid Tumor	A41B	1	1	1	0	1	Yes
1550	BRCA	Female	TCGA-A7-A4SB	TCGA-A7-A4SB-01A-21R-A266-07	TCGA-A7-A4SB-01A	TP	Primary solid Tumor	A266	1	1	1	0	1	Yes
1551	BRCA	Female	TCGA-AR-A0TP	TCGA-AR-A0TP-01A-11R-A084-07	TCGA-AR-A0TP-01A	TP	Primary solid Tumor	A084	1	1	1	0	1	Yes
1552	BRCA	Female	TCGA-D8-A1X9	TCGA-D8-A1X9-01A-12R-A157-07	TCGA-D8-A1X9-01A	TP	Primary solid Tumor	A157	1	1	1	0	1	Yes
1553	BRCA	Female	TCGA-A7-A2KD	TCGA-A7-A2KD-01A-31R-A21T-07	TCGA-A7-A2KD-01A	TP	Primary solid Tumor	A21T	1	1	1	0	1	Yes
1554	BRCA	Female	TCGA-OK-A5Q2	TCGA-OK-A5Q2-01A-11R-A27Q-07	TCGA-OK-A5Q2-01A	TP	Primary solid Tumor	A27Q	1	1	1	0	1	Yes
1555	BRCA	Female	TCGA-E2-A10C	TCGA-E2-A10C-01A-21R-A10J-07	TCGA-E2-A10C-01A	TP	Primary solid Tumor	A10J	1	1	1	0	1	Yes
1556	BRCA	Female	TCGA-B6-A0RI	TCGA-B6-A0RI-01A-11R-A056-07	TCGA-B6-A0RI-01A	TP	Primary solid Tumor	A056	1	1	1	0	1	Yes
1557	BRCA	Female	TCGA-E9-A229	TCGA-E9-A229-01A-31R-A157-07	TCGA-E9-A229-01A	TP	Primary solid Tumor	A157	1	1	1	0	1	Yes
1558	BRCA	Female	TCGA-A8-A08F	TCGA-A8-A08F-01A-11R-A00Z-07	TCGA-A8-A08F-01A	TP	Primary solid Tumor	A00Z	1	1	1	0	1	Yes
1559	BRCA	Female	TCGA-E9-A22A	TCGA-E9-A22A-01A-11R-A157-07	TCGA-E9-A22A-01A	TP	Primary solid Tumor	A157	1	1	1	0	1	Yes
1560	BRCA	Female	TCGA-AO-A0JB	TCGA-AO-A0JB-01A-11R-A32Y-07	TCGA-AO-A0JB-01A	TP	Primary solid Tumor	A32Y	1	1	1	0	1	Yes
1561	BRCA	Female	TCGA-BH-A0W5	TCGA-BH-A0W5-01A-11R-A109-07	TCGA-BH-A0W5-01A	TP	Primary solid Tumor	A109	1	1	1	0	1	Yes
1562	BRCA	Female	TCGA-AQ-A54O	TCGA-AQ-A54O-01A-11R-A266-07	TCGA-AQ-A54O-01A	TP	Primary solid Tumor	A266	1	1	1	0	1	Yes
1563	BRCA	Female	TCGA-A7-A13E	TCGA-A7-A13E-01A-11R-A12P-07	TCGA-A7-A13E-01A	TP	Primary solid Tumor	A12P	1	1	1	0	1	Yes
1564	BRCA	Female	TCGA-BH-A18P	TCGA-BH-A18P-11A-43R-A12D-07	TCGA-BH-A18P-11A	NT	Solid Tissue Normal	A12D	1	1	1	0	1	Yes
1565	BRCA	Female	TCGA-B6-A1KF	TCGA-B6-A1KF-01A-11R-A13Q-07	TCGA-B6-A1KF-01A	TP	Primary solid Tumor	A13Q	1	1	1	0	1	Yes
1566	BRCA	Female	TCGA-A7-A4SD	TCGA-A7-A4SD-01A-11R-A266-07	TCGA-A7-A4SD-01A	TP	Primary solid Tumor	A266	1	1	1	0	1	Yes
1567	BRCA	Female	TCGA-E9-A1N6	TCGA-E9-A1N6-01A-11R-A144-07	TCGA-E9-A1N6-01A	TP	Primary solid Tumor	A144	1	1	1	0	1	Yes
1568	BRCA	Female	TCGA-BH-A18R	TCGA-BH-A18R-01A-11R-A12D-07	TCGA-BH-A18R-01A	TP	Primary solid Tumor	A12D	1	1	1	0	1	Yes
1569	BRCA	Female	TCGA-GM-A2DN	TCGA-GM-A2DN-01A-11R-A180-07	TCGA-GM-A2DN-01A	TP	Primary solid Tumor	A180	1	1	1	0	1	Yes
1570	BRCA	Female	TCGA-OL-A66L	TCGA-OL-A66L-01A-12R-A31O-07	TCGA-OL-A66L-01A	TP	Primary solid Tumor	A31O	1	1	1	0	1	Yes
1571	BRCA	Female	TCGA-BH-A6R8	TCGA-BH-A6R8-01A-21R-A33J-07	TCGA-BH-A6R8-01A	TP	Primary solid Tumor	A33J	1	1	1	0	1	Yes
1572	BRCA	Female	TCGA-C8-A12V	TCGA-C8-A12V-01A-11R-A115-07	TCGA-C8-A12V-01A	TP	Primary solid Tumor	A115	1	1	1	0	1	Yes
1573	BRCA	Female	TCGA-AN-A0G0	TCGA-AN-A0G0-01A-11R-A034-07	TCGA-AN-A0G0-01A	TP	Primary solid Tumor	A034	1	1	1	0	1	Yes
1574	BRCA	Female	TCGA-AN-A0XL	TCGA-AN-A0XL-01A-11R-A10J-07	TCGA-AN-A0XL-01A	TP	Primary solid Tumor	A10J	1	1	1	0	1	Yes
1575	BRCA	Female	TCGA-E2-A156	TCGA-E2-A156-01A-11R-A12D-07	TCGA-E2-A156-01A	TP	Primary solid Tumor	A12D	1	1	1	0	1	Yes
1576	BRCA	Female	TCGA-E2-A155	TCGA-E2-A155-01A-11R-A12D-07	TCGA-E2-A155-01A	TP	Primary solid Tumor	A12D	1	1	1	0	1	Yes
1577	BRCA	Female	TCGA-OL-A5RX	TCGA-OL-A5RX-01A-11R-A28M-07	TCGA-OL-A5RX-01A	TP	Primary solid Tumor	A28M	1	1	1	0	1	Yes
1578	BRCA	Female	TCGA-AR-A1AU	TCGA-AR-A1AU-01A-11R-A12P-07	TCGA-AR-A1AU-01A	TP	Primary solid Tumor	A12P	1	1	1	0	1	Yes
1579	BRCA	Female	TCGA-E9-A1NA	TCGA-E9-A1NA-01A-11R-A144-07	TCGA-E9-A1NA-01A	TP	Primary solid Tumor	A144	1	1	1	0	1	Yes
1580	BRCA	Female	TCGA-GM-A2DK	TCGA-GM-A2DK-01A-21R-A180-07	TCGA-GM-A2DK-01A	TP	Primary solid Tumor	A180	1	1	1	0	1	Yes
1581	BRCA	Female	TCGA-E2-A107	TCGA-E2-A107-01A-11R-A10J-07	TCGA-E2-A107-01A	TP	Primary solid Tumor	A10J	1	1	1	0	1	Yes
1582	BRCA	Female	TCGA-E9-A1N9	TCGA-E9-A1N9-11A-71R-A14D-07	TCGA-E9-A1N9-11A	NT	Solid Tissue Normal	A14D	1	1	1	0	1	Yes
1583	BRCA	Female	TCGA-E9-A5FL	TCGA-E9-A5FL-01A-11R-A27Q-07	TCGA-E9-A5FL-01A	TP	Primary solid Tumor	A27Q	1	1	1	0	1	Yes
1584	BRCA	Female	TCGA-E2-A10E	TCGA-E2-A10E-01A-21R-A10J-07	TCGA-E2-A10E-01A	TP	Primary solid Tumor	A10J	1	1	1	0	1	Yes
1585	BRCA	Female	TCGA-OL-A5D8	TCGA-OL-A5D8-01A-11R-A27Q-07	TCGA-OL-A5D8-01A	TP	Primary solid Tumor	A27Q	1	1	1	0	1	Yes
1586	BRCA	Female	TCGA-E9-A6HE	TCGA-E9-A6HE-01A-11R-A31O-07	TCGA-E9-A6HE-01A	TP	Primary solid Tumor	A31O	1	1	1	0	1	Yes
1587	BRCA	Female	TCGA-S3-AA15	TCGA-S3-AA15-01A-11R-A41B-07	TCGA-S3-AA15-01A	TP	Primary solid Tumor	A41B	1	1	1	0	1	Yes
1588	BRCA	Female	TCGA-A2-A3KC	TCGA-A2-A3KC-01A-11R-A213-07	TCGA-A2-A3KC-01A	TP	Primary solid Tumor	A213	1	1	1	0	1	Yes
1589	BRCA	Female	TCGA-BH-A18V	TCGA-BH-A18V-01A-11R-A12D-07	TCGA-BH-A18V-01A	TP	Primary solid Tumor	A12D	1	1	1	0	1	Yes
1590	BRCA	Female	TCGA-E9-A1ND	TCGA-E9-A1ND-11A-43R-A144-07	TCGA-E9-A1ND-11A	NT	Solid Tissue Normal	A144	1	1	1	0	1	Yes
1591	BRCA	Female	TCGA-E9-A1ND	TCGA-E9-A1ND-01A-11R-A144-07	TCGA-E9-A1ND-01A	TP	Primary solid Tumor	A144	1	1	1	0	1	Yes
1592	BRCA	Female	TCGA-A7-A26J	TCGA-A7-A26J-01A-11R-A169-07	TCGA-A7-A26J-01A	TP	Primary solid Tumor	A169	1	1	1	0	1	Yes
1593	BRCA	Female	TCGA-E2-A105	TCGA-E2-A105-01A-11R-A10J-07	TCGA-E2-A105-01A	TP	Primary solid Tumor	A10J	1	1	1	0	1	Yes
1594	BRCA	Female	TCGA-GM-A2DI	TCGA-GM-A2DI-01A-31R-A18M-07	TCGA-GM-A2DI-01A	TP	Primary solid Tumor	A18M	1	1	1	0	1	Yes
1595	BRCA	Female	TCGA-A7-A4SE	TCGA-A7-A4SE-01A-11R-A266-07	TCGA-A7-A4SE-01A	TP	Primary solid Tumor	A266	1	1	1	0	1	Yes
1596	BRCA	Female	TCGA-E2-A108	TCGA-E2-A108-01A-13R-A10J-07	TCGA-E2-A108-01A	TP	Primary solid Tumor	A10J	1	1	1	0	1	Yes
1597	BRCA	Female	TCGA-AO-A0J5	TCGA-AO-A0J5-01A-11R-A034-07	TCGA-AO-A0J5-01A	TP	Primary solid Tumor	A034	1	1	1	0	1	Yes
1598	BRCA	Female	TCGA-E2-A10F	TCGA-E2-A10F-01A-11R-A10J-07	TCGA-E2-A10F-01A	TP	Primary solid Tumor	A10J	1	1	1	0	1	Yes
1599	BRCA	Female	TCGA-BH-A1ET	TCGA-BH-A1ET-11B-23R-A137-07	TCGA-BH-A1ET-11B	NT	Solid Tissue Normal	A137	1	1	1	0	1	Yes
1600	BRCA	Female	TCGA-BH-A0W4	TCGA-BH-A0W4-01A-11R-A109-07	TCGA-BH-A0W4-01A	TP	Primary solid Tumor	A109	1	1	1	0	1	Yes
1601	BRCA	Female	TCGA-AQ-A54N	TCGA-AQ-A54N-01A-11R-A266-07	TCGA-AQ-A54N-01A	TP	Primary solid Tumor	A266	1	1	1	0	1	Yes
1602	BRCA	Female	TCGA-E9-A1NC	TCGA-E9-A1NC-01A-21R-A26B-07	TCGA-E9-A1NC-01A	TP	Primary solid Tumor	A26B	1	1	1	0	1	Yes
1603	BRCA	Female	TCGA-BH-A1F8	TCGA-BH-A1F8-11B-21R-A13Q-07	TCGA-BH-A1F8-11B	NT	Solid Tissue Normal	A13Q	1	1	1	0	1	Yes
1604	BRCA	Female	TCGA-A7-A26J	TCGA-A7-A26J-01A-11R-A277-07	TCGA-A7-A26J-01A	TP	Primary solid Tumor	A277	0	1	0	0	1	No
1605	BRCA	Female	TCGA-OL-A5RY	TCGA-OL-A5RY-01A-21R-A28M-07	TCGA-OL-A5RY-01A	TP	Primary solid Tumor	A28M	1	1	1	0	1	Yes
1606	BRCA	Female	TCGA-D8-A1X8	TCGA-D8-A1X8-01A-11R-A14M-07	TCGA-D8-A1X8-01A	TP	Primary solid Tumor	A14M	1	1	1	0	1	Yes
1607	BRCA	Female	TCGA-E2-A106	TCGA-E2-A106-01A-11R-A10J-07	TCGA-E2-A106-01A	TP	Primary solid Tumor	A10J	1	1	1	0	1	Yes
1608	BRCA	Female	TCGA-GI-A2C8	TCGA-GI-A2C8-11A-22R-A16F-07	TCGA-GI-A2C8-11A	NT	Solid Tissue Normal	A16F	1	1	1	0	1	Yes
1609	BRCA	Female	TCGA-BH-A0BJ	TCGA-BH-A0BJ-11A-23R-A089-07	TCGA-BH-A0BJ-11A	NT	Solid Tissue Normal	A089	1	1	1	0	1	Yes
1610	BRCA	Female	TCGA-AO-A0J2	TCGA-AO-A0J2-01A-11R-A034-07	TCGA-AO-A0J2-01A	TP	Primary solid Tumor	A034	1	1	1	0	1	Yes
1611	BRCA	Female	TCGA-OL-A5D6	TCGA-OL-A5D6-01A-21R-A27Q-07	TCGA-OL-A5D6-01A	TP	Primary solid Tumor	A27Q	1	1	1	0	1	Yes
1612	BRCA	Female	TCGA-A7-A13H	TCGA-A7-A13H-01A-11R-A22K-07	TCGA-A7-A13H-01A	TP	Primary solid Tumor	A22K	1	1	1	0	1	Yes
1613	BRCA	Female	TCGA-BH-A1F2	TCGA-BH-A1F2-01A-31R-A13Q-07	TCGA-BH-A1F2-01A	TP	Primary solid Tumor	A13Q	1	1	1	0	1	Yes
1614	BRCA	Female	TCGA-C8-A12W	TCGA-C8-A12W-01A-11R-A115-07	TCGA-C8-A12W-01A	TP	Primary solid Tumor	A115	1	1	1	0	1	Yes
1615	BRCA	Female	TCGA-BH-A18M	TCGA-BH-A18M-11A-33R-A12D-07	TCGA-BH-A18M-11A	NT	Solid Tissue Normal	A12D	1	1	1	0	1	Yes
1616	BRCA	Female	TCGA-LL-A441	TCGA-LL-A441-01A-11R-A24H-07	TCGA-LL-A441-01A	TP	Primary solid Tumor	A24H	1	1	1	0	1	Yes
1617	BRCA	Female	TCGA-D8-A1JH	TCGA-D8-A1JH-01A-11R-A13Q-07	TCGA-D8-A1JH-01A	TP	Primary solid Tumor	A13Q	1	1	1	0	1	Yes
1618	BRCA	Female	TCGA-AQ-A7U7	TCGA-AQ-A7U7-01A-22R-A352-07	TCGA-AQ-A7U7-01A	TP	Primary solid Tumor	A352	1	1	1	0	1	Yes
1619	BRCA	Female	TCGA-E9-A3X8	TCGA-E9-A3X8-01A-31R-A22U-07	TCGA-E9-A3X8-01A	TP	Primary solid Tumor	A22U	1	1	1	0	1	Yes
1620	BRCA	Female	TCGA-BH-A18P	TCGA-BH-A18P-01A-11R-A12D-07	TCGA-BH-A18P-01A	TP	Primary solid Tumor	A12D	1	1	1	0	1	Yes
1621	BRCA	Female	TCGA-BH-A18N	TCGA-BH-A18N-01A-11R-A12D-07	TCGA-BH-A18N-01A	TP	Primary solid Tumor	A12D	1	1	1	0	1	Yes
1622	BRCA	Female	TCGA-BH-A0BG	TCGA-BH-A0BG-01A-11R-A115-07	TCGA-BH-A0BG-01A	TP	Primary solid Tumor	A115	1	1	1	0	1	Yes
1623	BRCA	Female	TCGA-EW-A2FV	TCGA-EW-A2FV-01A-11R-A17B-07	TCGA-EW-A2FV-01A	TP	Primary solid Tumor	A17B	1	1	1	0	1	Yes
1624	BRCA	Female	TCGA-E2-A15M	TCGA-E2-A15M-11A-22R-A12D-07	TCGA-E2-A15M-11A	NT	Solid Tissue Normal	A12D	1	1	1	0	1	Yes
1625	BRCA	Female	TCGA-GM-A3NW	TCGA-GM-A3NW-01A-21R-A22K-07	TCGA-GM-A3NW-01A	TP	Primary solid Tumor	A22K	1	1	1	0	1	Yes
1626	BRCA	Female	TCGA-AR-A2LL	TCGA-AR-A2LL-01A-11R-A180-07	TCGA-AR-A2LL-01A	TP	Primary solid Tumor	A180	1	1	1	0	1	Yes
1627	BRCA	Female	TCGA-BH-A18U	TCGA-BH-A18U-01A-21R-A12D-07	TCGA-BH-A18U-01A	TP	Primary solid Tumor	A12D	1	1	1	0	1	Yes
1628	BRCA	Female	TCGA-AO-A1KQ	TCGA-AO-A1KQ-01A-11R-A13Q-07	TCGA-AO-A1KQ-01A	TP	Primary solid Tumor	A13Q	1	1	1	0	1	Yes
1629	BRCA	Female	TCGA-A2-A0T5	TCGA-A2-A0T5-01A-21R-A084-07	TCGA-A2-A0T5-01A	TP	Primary solid Tumor	A084	1	1	1	0	1	Yes
1630	BRCA	Female	TCGA-B6-A0RP	TCGA-B6-A0RP-01A-21R-A084-07	TCGA-B6-A0RP-01A	TP	Primary solid Tumor	A084	1	1	1	0	1	Yes
1631	BRCA	Female	TCGA-A7-A26J	TCGA-A7-A26J-01B-02R-A277-07	TCGA-A7-A26J-01B	TP	Primary solid Tumor	A277	0	1	0	0	1	No
1632	BRCA	Female	TCGA-BH-A0BD	TCGA-BH-A0BD-01A-11R-A034-07	TCGA-BH-A0BD-01A	TP	Primary solid Tumor	A034	1	1	1	0	1	Yes
1633	BRCA	Female	TCGA-A7-A4SC	TCGA-A7-A4SC-01A-12R-A266-07	TCGA-A7-A4SC-01A	TP	Primary solid Tumor	A266	1	1	1	0	1	Yes
1634	BRCA	Female	TCGA-BH-A0BF	TCGA-BH-A0BF-01A-21R-A12P-07	TCGA-BH-A0BF-01A	TP	Primary solid Tumor	A12P	1	1	1	0	1	Yes
1635	BRCA	Female	TCGA-B6-A409	TCGA-B6-A409-01A-11R-A24H-07	TCGA-B6-A409-01A	TP	Primary solid Tumor	A24H	1	1	1	0	1	Yes
1636	BRCA	Female	TCGA-GI-A2C8	TCGA-GI-A2C8-01A-11R-A16F-07	TCGA-GI-A2C8-01A	TP	Primary solid Tumor	A16F	1	1	1	0	1	Yes
1637	BRCA	Female	TCGA-AQ-A04J	TCGA-AQ-A04J-01A-02R-A034-07	TCGA-AQ-A04J-01A	TP	Primary solid Tumor	A034	1	1	1	0	1	Yes
1638	BRCA	Female	TCGA-A2-A0CR	TCGA-A2-A0CR-01A-11R-A22K-07	TCGA-A2-A0CR-01A	TP	Primary solid Tumor	A22K	1	1	1	0	1	Yes
1639	BRCA	Female	TCGA-AO-A0JA	TCGA-AO-A0JA-01A-11R-A056-07	TCGA-AO-A0JA-01A	TP	Primary solid Tumor	A056	1	1	1	0	1	Yes
1640	BRCA	Female	TCGA-AQ-A1H3	TCGA-AQ-A1H3-01A-31R-A13Q-07	TCGA-AQ-A1H3-01A	TP	Primary solid Tumor	A13Q	1	1	1	0	1	Yes
1641	BRCA	Female	TCGA-A7-A6VX	TCGA-A7-A6VX-01A-12R-A33J-07	TCGA-A7-A6VX-01A	TP	Primary solid Tumor	A33J	1	1	1	0	1	Yes
1642	BRCA	Female	TCGA-AN-A0XN	TCGA-AN-A0XN-01A-21R-A109-07	TCGA-AN-A0XN-01A	TP	Primary solid Tumor	A109	1	1	1	0	1	Yes
1643	BRCA	Female	TCGA-BH-A18M	TCGA-BH-A18M-01A-11R-A12D-07	TCGA-BH-A18M-01A	TP	Primary solid Tumor	A12D	1	1	1	0	1	Yes
1644	BRCA	Female	TCGA-B6-A402	TCGA-B6-A402-01A-11R-A239-07	TCGA-B6-A402-01A	TP	Primary solid Tumor	A239	1	1	1	0	1	Yes
1645	BRCA	Female	TCGA-E9-A1NA	TCGA-E9-A1NA-11A-33R-A144-07	TCGA-E9-A1NA-11A	NT	Solid Tissue Normal	A144	1	1	1	0	1	Yes
1646	BRCA	Female	TCGA-A7-A6VW	TCGA-A7-A6VW-01A-21R-A33J-07	TCGA-A7-A6VW-01A	TP	Primary solid Tumor	A33J	1	1	1	0	1	Yes
1647	BRCA	Female	TCGA-A7-A6VV	TCGA-A7-A6VV-01A-22R-A33J-07	TCGA-A7-A6VV-01A	TP	Primary solid Tumor	A33J	1	1	1	0	1	Yes
1648	BRCA	Female	TCGA-EW-A6SB	TCGA-EW-A6SB-01A-12R-A32P-07	TCGA-EW-A6SB-01A	TP	Primary solid Tumor	A32P	1	1	1	0	1	Yes
1649	BRCA	Female	TCGA-OL-A5RU	TCGA-OL-A5RU-01A-11R-A28M-07	TCGA-OL-A5RU-01A	TP	Primary solid Tumor	A28M	1	1	1	0	1	Yes
1650	BRCA	Female	TCGA-BH-A0BJ	TCGA-BH-A0BJ-01A-11R-A056-07	TCGA-BH-A0BJ-01A	TP	Primary solid Tumor	A056	1	1	1	0	1	Yes
1651	BRCA	Female	TCGA-AQ-A04L	TCGA-AQ-A04L-01B-21R-A10J-07	TCGA-AQ-A04L-01B	TP	Primary solid Tumor	A10J	1	1	1	0	1	Yes
1652	BRCA	Female	TCGA-A7-A13F	TCGA-A7-A13F-11A-42R-A12P-07	TCGA-A7-A13F-11A	NT	Solid Tissue Normal	A12P	1	1	1	0	1	Yes
1653	BRCA	Female	TCGA-C8-A12T	TCGA-C8-A12T-01A-11R-A115-07	TCGA-C8-A12T-01A	TP	Primary solid Tumor	A115	1	1	1	0	1	Yes
1654	BRCA	Female	TCGA-A7-A26E	TCGA-A7-A26E-01A-11R-A169-07	TCGA-A7-A26E-01A	TP	Primary solid Tumor	A169	1	1	1	0	1	Yes
1655	BRCA	Female	TCGA-BH-A18U	TCGA-BH-A18U-11A-23R-A12D-07	TCGA-BH-A18U-11A	NT	Solid Tissue Normal	A12D	1	1	1	0	1	Yes
1656	BRCA	Female	TCGA-D8-A1JG	TCGA-D8-A1JG-01B-11R-A13Q-07	TCGA-D8-A1JG-01B	TP	Primary solid Tumor	A13Q	1	1	1	0	1	Yes
1657	BRCA	Female	TCGA-D8-A1X7	TCGA-D8-A1X7-01A-11R-A14M-07	TCGA-D8-A1X7-01A	TP	Primary solid Tumor	A14M	1	1	1	0	1	Yes
1658	BRCA	Female	TCGA-E2-A150	TCGA-E2-A150-01A-11R-A12D-07	TCGA-E2-A150-01A	TP	Primary solid Tumor	A12D	1	1	1	0	1	Yes
1659	BRCA	Female	TCGA-E2-A153	TCGA-E2-A153-01A-12R-A12D-07	TCGA-E2-A153-01A	TP	Primary solid Tumor	A12D	1	1	1	0	1	Yes
1660	BRCA	Female	TCGA-EW-A6SC	TCGA-EW-A6SC-01A-12R-A32P-07	TCGA-EW-A6SC-01A	TP	Primary solid Tumor	A32P	1	1	1	0	1	Yes
1661	BRCA	Female	TCGA-EW-A6SA	TCGA-EW-A6SA-01A-21R-A32P-07	TCGA-EW-A6SA-01A	TP	Primary solid Tumor	A32P	1	1	1	0	1	Yes
1662	BRCA	Female	TCGA-A2-A0T3	TCGA-A2-A0T3-01A-21R-A115-07	TCGA-A2-A0T3-01A	TP	Primary solid Tumor	A115	1	1	1	0	1	Yes
1663	BRCA	Female	TCGA-OL-A5RW	TCGA-OL-A5RW-01A-11R-A28M-07	TCGA-OL-A5RW-01A	TP	Primary solid Tumor	A28M	1	1	1	0	1	Yes
1664	BRCA	Female	TCGA-AO-A0J3	TCGA-AO-A0J3-01A-11R-A034-07	TCGA-AO-A0J3-01A	TP	Primary solid Tumor	A034	1	1	1	0	1	Yes
1665	BRCA	Female	TCGA-A2-A0T2	TCGA-A2-A0T2-01A-11R-A084-07	TCGA-A2-A0T2-01A	TP	Primary solid Tumor	A084	1	1	1	0	1	Yes
1666	BRCA	Female	TCGA-E2-A153	TCGA-E2-A153-11A-31R-A12D-07	TCGA-E2-A153-11A	NT	Solid Tissue Normal	A12D	1	1	1	0	1	Yes
1667	BRCA	Female	TCGA-AR-A2LM	TCGA-AR-A2LM-01A-11R-A180-07	TCGA-AR-A2LM-01A	TP	Primary solid Tumor	A180	1	1	1	0	1	Yes
1668	BRCA	Female	TCGA-EW-A1IW	TCGA-EW-A1IW-01A-11R-A13Q-07	TCGA-EW-A1IW-01A	TP	Primary solid Tumor	A13Q	1	1	1	0	1	Yes
1669	BRCA	Female	TCGA-E2-A14N	TCGA-E2-A14N-01A-31R-A137-07	TCGA-E2-A14N-01A	TP	Primary solid Tumor	A137	1	1	1	0	1	Yes
1670	BRCA	Female	TCGA-E9-A1N5	TCGA-E9-A1N5-11A-41R-A14D-07	TCGA-E9-A1N5-11A	NT	Solid Tissue Normal	A14D	1	1	1	0	1	Yes
1671	BRCA	Female	TCGA-A7-A6VY	TCGA-A7-A6VY-01A-12R-A33J-07	TCGA-A7-A6VY-01A	TP	Primary solid Tumor	A33J	1	1	1	0	1	Yes
1672	BRCA	Female	TCGA-B6-A408	TCGA-B6-A408-01A-12R-A24H-07	TCGA-B6-A408-01A	TP	Primary solid Tumor	A24H	1	1	1	0	1	Yes
1673	BRCA	Female	TCGA-D8-A1X6	TCGA-D8-A1X6-01A-11R-A14M-07	TCGA-D8-A1X6-01A	TP	Primary solid Tumor	A14M	1	1	1	0	1	Yes
1674	BRCA	Female	TCGA-AR-A24H	TCGA-AR-A24H-01A-11R-A169-07	TCGA-AR-A24H-01A	TP	Primary solid Tumor	A169	1	1	1	0	1	Yes
1675	BRCA	Female	TCGA-A7-A0DC	TCGA-A7-A0DC-11A-41R-A089-07	TCGA-A7-A0DC-11A	NT	Solid Tissue Normal	A089	1	1	1	0	1	Yes
1676	BRCA	Female	TCGA-EW-A2FS	TCGA-EW-A2FS-01A-11R-A17B-07	TCGA-EW-A2FS-01A	TP	Primary solid Tumor	A17B	1	1	1	0	1	Yes
1677	BRCA	Female	TCGA-GI-A2C9	TCGA-GI-A2C9-11A-22R-A21T-07	TCGA-GI-A2C9-11A	NT	Solid Tissue Normal	A21T	1	1	1	0	1	Yes
1678	BRCA	Female	TCGA-E2-A14Z	TCGA-E2-A14Z-01A-11R-A115-07	TCGA-E2-A14Z-01A	TP	Primary solid Tumor	A115	1	1	1	0	1	Yes
1679	BRCA	Female	TCGA-OL-A5DA	TCGA-OL-A5DA-01A-11R-A27Q-07	TCGA-OL-A5DA-01A	TP	Primary solid Tumor	A27Q	1	1	1	0	1	Yes
1680	BRCA	Female	TCGA-AO-A0J9	TCGA-AO-A0J9-01A-11R-A034-07	TCGA-AO-A0J9-01A	TP	Primary solid Tumor	A034	1	1	1	0	1	Yes
1681	BRCA	Female	TCGA-A7-A13G	TCGA-A7-A13G-11A-51R-A13Q-07	TCGA-A7-A13G-11A	NT	Solid Tissue Normal	A13Q	1	1	1	0	1	Yes
1682	BRCA	Female	TCGA-EW-A6S9	TCGA-EW-A6S9-01A-22R-A33J-07	TCGA-EW-A6S9-01A	TP	Primary solid Tumor	A33J	1	1	1	0	1	Yes
1683	BRCA	Female	TCGA-BH-A0BL	TCGA-BH-A0BL-01A-11R-A115-07	TCGA-BH-A0BL-01A	TP	Primary solid Tumor	A115	1	1	1	0	1	Yes
1684	BRCA	Female	TCGA-BH-A0BP	TCGA-BH-A0BP-01A-11R-A115-07	TCGA-BH-A0BP-01A	TP	Primary solid Tumor	A115	1	1	1	0	1	Yes
1685	BRCA	Female	TCGA-AO-A0J8	TCGA-AO-A0J8-01A-21R-A034-07	TCGA-AO-A0J8-01A	TP	Primary solid Tumor	A034	1	1	1	0	1	Yes
1686	BRCA	Female	TCGA-OL-A5RV	TCGA-OL-A5RV-01A-12R-A28M-07	TCGA-OL-A5RV-01A	TP	Primary solid Tumor	A28M	1	1	1	0	1	Yes
1687	BRCA	Female	TCGA-BH-A8G0	TCGA-BH-A8G0-01A-11R-A352-07	TCGA-BH-A8G0-01A	TP	Primary solid Tumor	A352	1	1	1	0	1	Yes
1688	BRCA	Female	TCGA-E2-A10B	TCGA-E2-A10B-01A-11R-A10J-07	TCGA-E2-A10B-01A	TP	Primary solid Tumor	A10J	1	1	1	0	1	Yes
1689	BRCA	Female	TCGA-AQ-A1H2	TCGA-AQ-A1H2-01A-11R-A13Q-07	TCGA-AQ-A1H2-01A	TP	Primary solid Tumor	A13Q	1	1	1	0	1	Yes
1690	BRCA	Female	TCGA-D8-A1JU	TCGA-D8-A1JU-01A-11R-A13Q-07	TCGA-D8-A1JU-01A	TP	Primary solid Tumor	A13Q	1	1	1	0	1	Yes
1691	BRCA	Female	TCGA-A7-A5ZV	TCGA-A7-A5ZV-01A-11R-A28M-07	TCGA-A7-A5ZV-01A	TP	Primary solid Tumor	A28M	1	1	1	0	1	Yes
1692	BRCA	Female	TCGA-AO-A0J7	TCGA-AO-A0J7-01A-11R-A034-07	TCGA-AO-A0J7-01A	TP	Primary solid Tumor	A034	1	1	1	0	1	Yes
1693	BRCA	Female	TCGA-C8-A12U	TCGA-C8-A12U-01A-11R-A115-07	TCGA-C8-A12U-01A	TP	Primary solid Tumor	A115	1	1	1	0	1	Yes
1694	BRCA	Female	TCGA-B6-A0RO	TCGA-B6-A0RO-01A-22R-A084-07	TCGA-B6-A0RO-01A	TP	Primary solid Tumor	A084	1	1	1	0	1	Yes
1695	BRCA	Female	TCGA-EW-A2FR	TCGA-EW-A2FR-01A-11R-A21T-07	TCGA-EW-A2FR-01A	TP	Primary solid Tumor	A21T	1	1	1	0	1	Yes
1696	BRCA	Female	TCGA-EW-A2FW	TCGA-EW-A2FW-01A-11R-A17B-07	TCGA-EW-A2FW-01A	TP	Primary solid Tumor	A17B	1	1	1	0	1	Yes
1697	BRCA	Female	TCGA-GI-A2C9	TCGA-GI-A2C9-01A-11R-A21T-07	TCGA-GI-A2C9-01A	TP	Primary solid Tumor	A21T	1	1	1	0	1	Yes
1698	BRCA	Female	TCGA-A2-A0CP	TCGA-A2-A0CP-01A-11R-A034-07	TCGA-A2-A0CP-01A	TP	Primary solid Tumor	A034	1	1	1	0	1	Yes
1699	BRCA	Female	TCGA-AR-A24L	TCGA-AR-A24L-01A-11R-A169-07	TCGA-AR-A24L-01A	TP	Primary solid Tumor	A169	1	1	1	0	1	Yes
1700	BRCA	Female	TCGA-D8-A1X5	TCGA-D8-A1X5-01A-11R-A14D-07	TCGA-D8-A1X5-01A	TP	Primary solid Tumor	A14D	1	1	1	0	1	Yes
1701	BRCA	Female	TCGA-E2-A14Y	TCGA-E2-A14Y-01A-21R-A12D-07	TCGA-E2-A14Y-01A	TP	Primary solid Tumor	A12D	1	1	1	0	1	Yes
1702	BRCA	Female	TCGA-BH-A8FZ	TCGA-BH-A8FZ-01A-11R-A352-07	TCGA-BH-A8FZ-01A	TP	Primary solid Tumor	A352	1	1	1	0	1	Yes
1703	BRCA	Female	TCGA-AC-A2FF	TCGA-AC-A2FF-11A-13R-A17B-07	TCGA-AC-A2FF-11A	NT	Solid Tissue Normal	A17B	1	1	1	0	1	Yes
1704	BRCA	Female	TCGA-E9-A1N5	TCGA-E9-A1N5-01A-11R-A14D-07	TCGA-E9-A1N5-01A	TP	Primary solid Tumor	A14D	1	1	1	0	1	Yes
1705	BRCA	Female	TCGA-AO-A0J6	TCGA-AO-A0J6-01A-11R-A034-07	TCGA-AO-A0J6-01A	TP	Primary solid Tumor	A034	1	1	1	0	1	Yes
1706	BRCA	Female	TCGA-D8-A1JF	TCGA-D8-A1JF-01A-11R-A13Q-07	TCGA-D8-A1JF-01A	TP	Primary solid Tumor	A13Q	1	1	1	0	1	Yes
1707	BRCA	Female	TCGA-A7-A4SF	TCGA-A7-A4SF-01A-11R-A266-07	TCGA-A7-A4SF-01A	TP	Primary solid Tumor	A266	1	1	1	0	1	Yes
1708	BRCA	Female	TCGA-E2-A10A	TCGA-E2-A10A-01A-21R-A115-07	TCGA-E2-A10A-01A	TP	Primary solid Tumor	A115	1	1	1	0	1	Yes
1709	BRCA	Female	TCGA-EW-A423	TCGA-EW-A423-01A-11R-A24H-07	TCGA-EW-A423-01A	TP	Primary solid Tumor	A24H	1	1	1	0	1	Yes
1710	BRCA	Female	TCGA-AQ-A0Y5	TCGA-AQ-A0Y5-01A-11R-A14M-07	TCGA-AQ-A0Y5-01A	TP	Primary solid Tumor	A14M	1	1	1	0	1	Yes
1711	BRCA	Female	TCGA-BH-A0BO	TCGA-BH-A0BO-01A-23R-A12D-07	TCGA-BH-A0BO-01A	TP	Primary solid Tumor	A12D	1	1	1	0	1	Yes
1712	BRCA	Female	TCGA-E2-A109	TCGA-E2-A109-01A-11R-A10J-07	TCGA-E2-A109-01A	TP	Primary solid Tumor	A10J	1	1	1	0	1	Yes
1713	BRCA	Female	TCGA-EW-A3U0	TCGA-EW-A3U0-01A-11R-A22K-07	TCGA-EW-A3U0-01A	TP	Primary solid Tumor	A22K	1	1	1	0	1	Yes
1714	BRCA	Female	TCGA-A7-A56D	TCGA-A7-A56D-01A-11R-A27Q-07	TCGA-A7-A56D-01A	TP	Primary solid Tumor	A27Q	1	1	1	0	1	Yes
1715	BRCA	Female	TCGA-A7-A5ZX	TCGA-A7-A5ZX-01A-12R-A29R-07	TCGA-A7-A5ZX-01A	TP	Primary solid Tumor	A29R	1	1	1	0	1	Yes
1716	BRCA	Female	TCGA-EW-A3E8	TCGA-EW-A3E8-01B-11R-A24H-07	TCGA-EW-A3E8-01B	TP	Primary solid Tumor	A24H	1	1	1	0	1	Yes
1717	BRCA	Female	TCGA-EW-A424	TCGA-EW-A424-01A-11R-A24H-07	TCGA-EW-A424-01A	TP	Primary solid Tumor	A24H	1	1	1	0	1	Yes
1718	BRCA	Female	TCGA-E9-A1N4	TCGA-E9-A1N4-11A-33R-A14M-07	TCGA-E9-A1N4-11A	NT	Solid Tissue Normal	A14M	1	1	1	0	1	Yes
1719	BRCA	Female	TCGA-AO-A0J4	TCGA-AO-A0J4-01A-11R-A034-07	TCGA-AO-A0J4-01A	TP	Primary solid Tumor	A034	1	1	1	0	1	Yes
1720	BRCA	Female	TCGA-A7-A5ZW	TCGA-A7-A5ZW-01A-12R-A29R-07	TCGA-A7-A5ZW-01A	TP	Primary solid Tumor	A29R	1	1	1	0	1	Yes
1721	BRCA	Female	TCGA-BH-A0BM	TCGA-BH-A0BM-11A-12R-A089-07	TCGA-BH-A0BM-11A	NT	Solid Tissue Normal	A089	1	1	1	0	1	Yes
1722	BRCA	Female	TCGA-BH-A0BM	TCGA-BH-A0BM-01A-11R-A056-07	TCGA-BH-A0BM-01A	TP	Primary solid Tumor	A056	1	1	1	0	1	Yes
1723	BRCA	Female	TCGA-AC-A2BM	TCGA-AC-A2BM-01A-11R-A21T-07	TCGA-AC-A2BM-01A	TP	Primary solid Tumor	A21T	1	1	1	0	1	Yes
1724	BRCA	Female	TCGA-D8-A1JT	TCGA-D8-A1JT-01A-31R-A13Q-07	TCGA-D8-A1JT-01A	TP	Primary solid Tumor	A13Q	1	1	1	0	1	Yes
1725	BRCA	Female	TCGA-AR-A24K	TCGA-AR-A24K-01A-11R-A169-07	TCGA-AR-A24K-01A	TP	Primary solid Tumor	A169	1	1	1	0	1	Yes
1726	BRCA	Female	TCGA-AC-A2BK	TCGA-AC-A2BK-01A-11R-A21T-07	TCGA-AC-A2BK-01A	TP	Primary solid Tumor	A21T	1	1	1	0	1	Yes
1727	BRCAmets	NA	TCGA-E2-A15E	TCGA-E2-A15E-06A-11R-A12D-07	TCGA-E2-A15E-06A	TM	Metastatic	A12D	1	1	1	1	1	No
1728	BRCAmets	NA	TCGA-BH-A1FE	TCGA-BH-A1FE-06A-11R-A213-07	TCGA-BH-A1FE-06A	TM	Metastatic	A213	1	1	1	1	1	No
1729	BRCAmets	NA	TCGA-AC-A6IX	TCGA-AC-A6IX-06A-11R-A32P-07	TCGA-AC-A6IX-06A	TM	Metastatic	A32P	1	1	1	1	1	No
1730	BRCAmets	NA	TCGA-BH-A18V	TCGA-BH-A18V-06A-11R-A213-07	TCGA-BH-A18V-06A	TM	Metastatic	A213	1	1	1	1	1	No
1731	BRCAmets	NA	TCGA-E2-A15K	TCGA-E2-A15K-06A-11R-A12P-07	TCGA-E2-A15K-06A	TM	Metastatic	A12P	1	1	1	1	1	No
1732	BRCAmets	NA	TCGA-BH-A1ES	TCGA-BH-A1ES-06A-12R-A24H-07	TCGA-BH-A1ES-06A	TM	Metastatic	A24H	1	1	1	1	1	No
1733	BRCAmets	NA	TCGA-E2-A15A	TCGA-E2-A15A-06A-11R-A12D-07	TCGA-E2-A15A-06A	TM	Metastatic	A12D	1	1	1	1	1	No
1734	CESC	Female	TCGA-C5-A7CH	TCGA-C5-A7CH-01A-11R-A33Z-07	TCGA-C5-A7CH-01A	TP	Primary solid Tumor	A33Z	1	1	1	0	1	Yes
1735	CESC	Female	TCGA-C5-A3HL	TCGA-C5-A3HL-01A-11R-A213-07	TCGA-C5-A3HL-01A	TP	Primary solid Tumor	A213	1	1	1	0	1	Yes
1736	CESC	Female	TCGA-R2-A69V	TCGA-R2-A69V-01A-11R-A32P-07	TCGA-R2-A69V-01A	TP	Primary solid Tumor	A32P	1	1	1	0	1	Yes
1737	CESC	Female	TCGA-JW-A5VG	TCGA-JW-A5VG-01A-11R-A28H-07	TCGA-JW-A5VG-01A	TP	Primary solid Tumor	A28H	1	1	1	0	1	Yes
1738	CESC	Female	TCGA-EK-A2RO	TCGA-EK-A2RO-01A-11R-A18M-07	TCGA-EK-A2RO-01A	TP	Primary solid Tumor	A18M	1	1	1	0	1	Yes
1739	CESC	Female	TCGA-C5-A7CG	TCGA-C5-A7CG-01A-11R-A32P-07	TCGA-C5-A7CG-01A	TP	Primary solid Tumor	A32P	1	1	1	0	1	Yes
1740	CESC	Female	TCGA-C5-A7CL	TCGA-C5-A7CL-01A-11R-A32P-07	TCGA-C5-A7CL-01A	TP	Primary solid Tumor	A32P	1	1	1	0	1	Yes
1741	CESC	Female	TCGA-FU-A23K	TCGA-FU-A23K-01A-11R-A16R-07	TCGA-FU-A23K-01A	TP	Primary solid Tumor	A16R	1	1	1	0	1	Yes
1742	CESC	Female	TCGA-VS-A958	TCGA-VS-A958-01A-11R-A42T-07	TCGA-VS-A958-01A	TP	Primary solid Tumor	A42T	1	1	1	0	1	Yes
1743	CESC	Female	TCGA-EK-A2RM	TCGA-EK-A2RM-01A-21R-A18M-07	TCGA-EK-A2RM-01A	TP	Primary solid Tumor	A18M	1	1	1	0	1	Yes
1744	CESC	Female	TCGA-MU-A51Y	TCGA-MU-A51Y-01A-11R-A26T-07	TCGA-MU-A51Y-01A	TP	Primary solid Tumor	A26T	1	1	1	0	1	Yes
1745	CESC	Female	TCGA-VS-A9UO	TCGA-VS-A9UO-01A-11R-A42T-07	TCGA-VS-A9UO-01A	TP	Primary solid Tumor	A42T	1	1	1	0	1	Yes
1746	CESC	Female	TCGA-EK-A3GJ	TCGA-EK-A3GJ-01A-21R-A213-07	TCGA-EK-A3GJ-01A	TP	Primary solid Tumor	A213	1	1	1	0	1	Yes
1747	CESC	Female	TCGA-UC-A7PF	TCGA-UC-A7PF-01A-11R-A352-07	TCGA-UC-A7PF-01A	TP	Primary solid Tumor	A352	1	1	1	0	1	Yes
1748	CESC	Female	TCGA-EK-A2RN	TCGA-EK-A2RN-01A-12R-A213-07	TCGA-EK-A2RN-01A	TP	Primary solid Tumor	A213	1	1	1	0	1	Yes
1749	CESC	Female	TCGA-C5-A3HD	TCGA-C5-A3HD-01B-11R-A213-07	TCGA-C5-A3HD-01B	TP	Primary solid Tumor	A213	1	1	1	0	1	Yes
1750	CESC	Female	TCGA-VS-A957	TCGA-VS-A957-01A-11R-A42T-07	TCGA-VS-A957-01A	TP	Primary solid Tumor	A42T	1	1	1	0	1	Yes
1751	CESC	Female	TCGA-UC-A7PG	TCGA-UC-A7PG-01A-11R-A42S-07	TCGA-UC-A7PG-01A	TP	Primary solid Tumor	A42S	1	1	1	0	1	Yes
1752	CESC	Female	TCGA-Q1-A73P	TCGA-Q1-A73P-01A-11R-A32P-07	TCGA-Q1-A73P-01A	TP	Primary solid Tumor	A32P	1	1	1	0	1	Yes
1753	CESC	Female	TCGA-JW-A5VI	TCGA-JW-A5VI-01A-11R-A28H-07	TCGA-JW-A5VI-01A	TP	Primary solid Tumor	A28H	1	1	1	0	1	Yes
1754	CESC	Female	TCGA-EX-A8YF	TCGA-EX-A8YF-01A-11R-A37O-07	TCGA-EX-A8YF-01A	TP	Primary solid Tumor	A37O	1	1	1	0	1	Yes
1755	CESC	Female	TCGA-UC-A7PI	TCGA-UC-A7PI-01A-11R-A42S-07	TCGA-UC-A7PI-01A	TP	Primary solid Tumor	A42S	1	1	1	0	1	Yes
1756	CESC	Female	TCGA-Q1-A5R3	TCGA-Q1-A5R3-01A-11R-A28H-07	TCGA-Q1-A5R3-01A	TP	Primary solid Tumor	A28H	1	1	1	0	1	Yes
1757	CESC	Female	TCGA-C5-A1BF	TCGA-C5-A1BF-01B-11R-A13Y-07	TCGA-C5-A1BF-01B	TP	Primary solid Tumor	A13Y	1	1	1	0	1	Yes
1758	CESC	Female	TCGA-DG-A2KL	TCGA-DG-A2KL-01A-11R-A180-07	TCGA-DG-A2KL-01A	TP	Primary solid Tumor	A180	1	1	1	0	1	Yes
1759	CESC	Female	TCGA-Q1-A6DV	TCGA-Q1-A6DV-01A-11R-A32P-07	TCGA-Q1-A6DV-01A	TP	Primary solid Tumor	A32P	1	1	1	0	1	Yes
1760	CESC	Female	TCGA-C5-A3HE	TCGA-C5-A3HE-01A-21R-A22U-07	TCGA-C5-A3HE-01A	TP	Primary solid Tumor	A22U	1	1	1	0	1	Yes
1761	CESC	Female	TCGA-DG-A2KJ	TCGA-DG-A2KJ-01A-11R-A32Y-07	TCGA-DG-A2KJ-01A	TP	Primary solid Tumor	A32Y	1	1	1	0	1	Yes
1762	CESC	Female	TCGA-C5-A3HF	TCGA-C5-A3HF-01A-11R-A213-07	TCGA-C5-A3HF-01A	TP	Primary solid Tumor	A213	1	1	1	0	1	Yes
1763	CESC	Female	TCGA-Q1-A73Q	TCGA-Q1-A73Q-01A-21R-A32P-07	TCGA-Q1-A73Q-01A	TP	Primary solid Tumor	A32P	1	1	1	0	1	Yes
1764	CESC	Female	TCGA-EK-A2RL	TCGA-EK-A2RL-01A-11R-A18M-07	TCGA-EK-A2RL-01A	TP	Primary solid Tumor	A18M	1	1	1	0	1	Yes
1765	CESC	Female	TCGA-VS-A9UP	TCGA-VS-A9UP-01A-11R-A42T-07	TCGA-VS-A9UP-01A	TP	Primary solid Tumor	A42T	1	1	1	0	1	Yes
1766	CESC	Female	TCGA-VS-A9UR	TCGA-VS-A9UR-01A-11R-A42T-07	TCGA-VS-A9UR-01A	TP	Primary solid Tumor	A42T	1	1	1	0	1	Yes
1767	CESC	Female	TCGA-C5-A7CM	TCGA-C5-A7CM-01A-11R-A33Z-07	TCGA-C5-A7CM-01A	TP	Primary solid Tumor	A33Z	1	1	1	0	1	Yes
1768	CESC	Female	TCGA-Q1-A6DT	TCGA-Q1-A6DT-01A-11R-A32P-07	TCGA-Q1-A6DT-01A	TP	Primary solid Tumor	A32P	1	1	1	0	1	Yes
1769	CESC	Female	TCGA-Q1-A5R2	TCGA-Q1-A5R2-01A-11R-A28H-07	TCGA-Q1-A5R2-01A	TP	Primary solid Tumor	A28H	1	1	1	0	1	Yes
1770	CESC	Female	TCGA-UC-A7PD	TCGA-UC-A7PD-01A-11R-A352-07	TCGA-UC-A7PD-01A	TP	Primary solid Tumor	A352	1	1	1	0	1	Yes
1771	CESC	Female	TCGA-C5-A7CO	TCGA-C5-A7CO-01A-11R-A352-07	TCGA-C5-A7CO-01A	TP	Primary solid Tumor	A352	1	1	1	0	1	Yes
1772	CESC	Female	TCGA-EK-A2RA	TCGA-EK-A2RA-01A-11R-A18M-07	TCGA-EK-A2RA-01A	TP	Primary solid Tumor	A18M	1	1	1	0	1	Yes
1773	CESC	Female	TCGA-HM-A6W2	TCGA-HM-A6W2-01A-21R-A33Z-07	TCGA-HM-A6W2-01A	TP	Primary solid Tumor	A33Z	1	1	1	0	1	Yes
1774	CESC	Female	TCGA-C5-A1BI	TCGA-C5-A1BI-01B-11R-A13Y-07	TCGA-C5-A1BI-01B	TP	Primary solid Tumor	A13Y	1	1	1	0	1	Yes
1775	CESC	Female	TCGA-C5-A1BJ	TCGA-C5-A1BJ-01A-11R-A13Y-07	TCGA-C5-A1BJ-01A	TP	Primary solid Tumor	A13Y	1	1	1	0	1	Yes
1776	CESC	Female	TCGA-C5-A2M1	TCGA-C5-A2M1-01A-11R-A18M-07	TCGA-C5-A2M1-01A	TP	Primary solid Tumor	A18M	1	1	1	0	1	Yes
1777	CESC	Female	TCGA-DS-A0VL	TCGA-DS-A0VL-01A-21R-A10U-07	TCGA-DS-A0VL-01A	TP	Primary solid Tumor	A10U	1	1	1	0	1	Yes
1778	CESC	Female	TCGA-VS-A954	TCGA-VS-A954-01A-11R-A38B-07	TCGA-VS-A954-01A	TP	Primary solid Tumor	A38B	1	1	1	0	1	Yes
1779	CESC	Female	TCGA-EX-A69M	TCGA-EX-A69M-01A-11R-A32P-07	TCGA-EX-A69M-01A	TP	Primary solid Tumor	A32P	1	1	1	0	1	Yes
1780	CESC	Female	TCGA-Q1-A73S	TCGA-Q1-A73S-01A-11R-A33Z-07	TCGA-Q1-A73S-01A	TP	Primary solid Tumor	A33Z	1	1	1	0	1	Yes
1781	CESC	Female	TCGA-ZX-AA5X	TCGA-ZX-AA5X-01A-11R-A42T-07	TCGA-ZX-AA5X-01A	TP	Primary solid Tumor	A42T	1	1	1	0	1	Yes
1782	CESC	Female	TCGA-C5-A1M7	TCGA-C5-A1M7-01A-11R-A13Y-07	TCGA-C5-A1M7-01A	TP	Primary solid Tumor	A13Y	1	1	1	0	1	Yes
1783	CESC	Female	TCGA-VS-A9UT	TCGA-VS-A9UT-01A-11R-A42T-07	TCGA-VS-A9UT-01A	TP	Primary solid Tumor	A42T	1	1	1	0	1	Yes
1784	CESC	Female	TCGA-DG-A2KM	TCGA-DG-A2KM-01A-11R-A180-07	TCGA-DG-A2KM-01A	TP	Primary solid Tumor	A180	1	1	1	0	1	Yes
1785	CESC	Female	TCGA-JW-A5VK	TCGA-JW-A5VK-01A-11R-A28H-07	TCGA-JW-A5VK-01A	TP	Primary solid Tumor	A28H	1	1	1	0	1	Yes
1786	CESC	Female	TCGA-DG-A2KK	TCGA-DG-A2KK-01A-11R-A180-07	TCGA-DG-A2KK-01A	TP	Primary solid Tumor	A180	1	1	1	0	1	Yes
1787	CESC	Female	TCGA-C5-A2M2	TCGA-C5-A2M2-01A-21R-A18M-07	TCGA-C5-A2M2-01A	TP	Primary solid Tumor	A18M	1	1	1	0	1	Yes
1788	CESC	Female	TCGA-PN-A8MA	TCGA-PN-A8MA-01A-11R-A36F-07	TCGA-PN-A8MA-01A	TP	Primary solid Tumor	A36F	1	1	1	0	1	Yes
1789	CESC	Female	TCGA-VS-A9UH	TCGA-VS-A9UH-01A-11R-A42T-07	TCGA-VS-A9UH-01A	TP	Primary solid Tumor	A42T	1	1	1	0	1	Yes
1790	CESC	Female	TCGA-EK-A2RJ	TCGA-EK-A2RJ-01A-11R-A18M-07	TCGA-EK-A2RJ-01A	TP	Primary solid Tumor	A18M	1	1	1	0	1	Yes
1791	CESC	Female	TCGA-VS-A9UM	TCGA-VS-A9UM-01A-11R-A42T-07	TCGA-VS-A9UM-01A	TP	Primary solid Tumor	A42T	1	1	1	0	1	Yes
1792	CESC	Female	TCGA-C5-A7CJ	TCGA-C5-A7CJ-01A-11R-A32P-07	TCGA-C5-A7CJ-01A	TP	Primary solid Tumor	A32P	1	1	1	0	1	Yes
1793	CESC	Female	TCGA-EX-A449	TCGA-EX-A449-01A-11R-A32Y-07	TCGA-EX-A449-01A	TP	Primary solid Tumor	A32Y	1	1	1	0	1	Yes
1794	CESC	Female	TCGA-EA-A556	TCGA-EA-A556-01A-11R-A26T-07	TCGA-EA-A556-01A	TP	Primary solid Tumor	A26T	1	1	1	0	1	Yes
1795	CESC	Female	TCGA-C5-A1M5	TCGA-C5-A1M5-01A-11R-A13Y-07	TCGA-C5-A1M5-01A	TP	Primary solid Tumor	A13Y	1	1	1	0	1	Yes
1796	CESC	Female	TCGA-MU-A5YI	TCGA-MU-A5YI-01A-11R-A32P-07	TCGA-MU-A5YI-01A	TP	Primary solid Tumor	A32P	1	1	1	0	1	Yes
1797	CESC	Female	TCGA-Q1-A5R1	TCGA-Q1-A5R1-01A-11R-A28H-07	TCGA-Q1-A5R1-01A	TP	Primary solid Tumor	A28H	1	1	1	0	1	Yes
1798	CESC	Female	TCGA-DS-A1O9	TCGA-DS-A1O9-01A-11R-A14Y-07	TCGA-DS-A1O9-01A	TP	Primary solid Tumor	A14Y	1	1	1	0	1	Yes
1799	CESC	Female	TCGA-DR-A0ZL	TCGA-DR-A0ZL-01A-11R-A10U-07	TCGA-DR-A0ZL-01A	TP	Primary solid Tumor	A10U	1	1	1	0	1	Yes
1800	CESC	Female	TCGA-EK-A2RC	TCGA-EK-A2RC-01A-11R-A18M-07	TCGA-EK-A2RC-01A	TP	Primary solid Tumor	A18M	1	1	1	0	1	Yes
1801	CESC	Female	TCGA-FU-A770	TCGA-FU-A770-01A-11R-A33Z-07	TCGA-FU-A770-01A	TP	Primary solid Tumor	A33Z	1	1	1	0	1	Yes
1802	CESC	Female	TCGA-EK-A2RK	TCGA-EK-A2RK-01A-11R-A18M-07	TCGA-EK-A2RK-01A	TP	Primary solid Tumor	A18M	1	1	1	0	1	Yes
1803	CESC	Female	TCGA-VS-A9UD	TCGA-VS-A9UD-01A-11R-A42T-07	TCGA-VS-A9UD-01A	TP	Primary solid Tumor	A42T	1	1	1	0	1	Yes
1804	CESC	Female	TCGA-VS-A953	TCGA-VS-A953-01A-11R-A38B-07	TCGA-VS-A953-01A	TP	Primary solid Tumor	A38B	1	1	1	0	1	Yes
1805	CESC	Female	TCGA-VS-A9UJ	TCGA-VS-A9UJ-01A-11R-A42T-07	TCGA-VS-A9UJ-01A	TP	Primary solid Tumor	A42T	1	1	1	0	1	Yes
1806	CESC	Female	TCGA-FU-A3HY	TCGA-FU-A3HY-01A-11R-A21T-07	TCGA-FU-A3HY-01A	TP	Primary solid Tumor	A21T	1	1	1	0	1	Yes
1807	CESC	Female	TCGA-VS-A959	TCGA-VS-A959-01A-11R-A42T-07	TCGA-VS-A959-01A	TP	Primary solid Tumor	A42T	1	1	1	0	1	Yes
1808	CESC	Female	TCGA-EX-A69L	TCGA-EX-A69L-01A-11R-A32P-07	TCGA-EX-A69L-01A	TP	Primary solid Tumor	A32P	1	1	1	0	1	Yes
1809	CESC	Female	TCGA-C5-A1M6	TCGA-C5-A1M6-01A-11R-A13Y-07	TCGA-C5-A1M6-01A	TP	Primary solid Tumor	A13Y	1	1	1	0	1	Yes
1810	CESC	Female	TCGA-DS-A1OB	TCGA-DS-A1OB-01A-11R-A14Y-07	TCGA-DS-A1OB-01A	TP	Primary solid Tumor	A14Y	1	1	1	0	1	Yes
1811	CESC	Female	TCGA-EA-A5O9	TCGA-EA-A5O9-01A-11R-A28H-07	TCGA-EA-A5O9-01A	TP	Primary solid Tumor	A28H	1	1	1	0	1	Yes
1812	CESC	Female	TCGA-VS-A8QH	TCGA-VS-A8QH-01A-11R-A37O-07	TCGA-VS-A8QH-01A	TP	Primary solid Tumor	A37O	1	1	1	0	1	Yes
1813	CESC	Female	TCGA-EK-A2RB	TCGA-EK-A2RB-01A-11R-A18M-07	TCGA-EK-A2RB-01A	TP	Primary solid Tumor	A18M	1	1	1	0	1	Yes
1814	CESC	Female	TCGA-VS-A94X	TCGA-VS-A94X-01A-11R-A38B-07	TCGA-VS-A94X-01A	TP	Primary solid Tumor	A38B	1	1	1	0	1	Yes
1815	CESC	Female	TCGA-C5-A7UE	TCGA-C5-A7UE-01A-11R-A33Z-07	TCGA-C5-A7UE-01A	TP	Primary solid Tumor	A33Z	1	1	1	0	1	Yes
1816	CESC	Female	TCGA-FU-A23L	TCGA-FU-A23L-01A-11R-A16R-07	TCGA-FU-A23L-01A	TP	Primary solid Tumor	A16R	1	1	1	0	1	Yes
1817	CESC	Female	TCGA-VS-A9UI	TCGA-VS-A9UI-01A-11R-A42T-07	TCGA-VS-A9UI-01A	TP	Primary solid Tumor	A42T	1	1	1	0	1	Yes
1818	CESC	Female	TCGA-JW-A5VH	TCGA-JW-A5VH-01A-11R-A28H-07	TCGA-JW-A5VH-01A	TP	Primary solid Tumor	A28H	1	1	1	0	1	Yes
1819	CESC	Female	TCGA-C5-A1BL	TCGA-C5-A1BL-01A-11R-A13Y-07	TCGA-C5-A1BL-01A	TP	Primary solid Tumor	A13Y	1	1	1	0	1	Yes
1820	CESC	Female	TCGA-MA-AA43	TCGA-MA-AA43-01A-11R-A42T-07	TCGA-MA-AA43-01A	TP	Primary solid Tumor	A42T	1	1	1	0	1	Yes
1821	CESC	Female	TCGA-FU-A3EO	TCGA-FU-A3EO-11A-13R-A213-07	TCGA-FU-A3EO-11A	NT	Solid Tissue Normal	A213	1	1	1	0	1	Yes
1822	CESC	Female	TCGA-MU-A8JM	TCGA-MU-A8JM-01A-11R-A36F-07	TCGA-MU-A8JM-01A	TP	Primary solid Tumor	A36F	1	1	1	0	1	Yes
1823	CESC	Female	TCGA-EK-A3GK	TCGA-EK-A3GK-01A-11R-A213-07	TCGA-EK-A3GK-01A	TP	Primary solid Tumor	A213	1	1	1	0	1	Yes
1824	CESC	Female	TCGA-JW-A69B	TCGA-JW-A69B-01A-11R-A32P-07	TCGA-JW-A69B-01A	TP	Primary solid Tumor	A32P	1	1	1	0	1	Yes
1825	CESC	Female	TCGA-JW-A5VJ	TCGA-JW-A5VJ-01A-11R-A28H-07	TCGA-JW-A5VJ-01A	TP	Primary solid Tumor	A28H	1	1	1	0	1	Yes
1826	CESC	Female	TCGA-JW-A852	TCGA-JW-A852-01A-11R-A352-07	TCGA-JW-A852-01A	TP	Primary solid Tumor	A352	1	1	1	0	1	Yes
1827	CESC	Female	TCGA-VS-A94W	TCGA-VS-A94W-01A-12R-A37O-07	TCGA-VS-A94W-01A	TP	Primary solid Tumor	A37O	1	1	1	0	1	Yes
1828	CESC	Female	TCGA-C5-A2LX	TCGA-C5-A2LX-01A-11R-A18M-07	TCGA-C5-A2LX-01A	TP	Primary solid Tumor	A18M	1	1	1	0	1	Yes
1829	CESC	Female	TCGA-FU-A5XV	TCGA-FU-A5XV-01A-11R-A28H-07	TCGA-FU-A5XV-01A	TP	Primary solid Tumor	A28H	1	1	1	0	1	Yes
1830	CESC	Female	TCGA-VS-A94Y	TCGA-VS-A94Y-01A-11R-A38B-07	TCGA-VS-A94Y-01A	TP	Primary solid Tumor	A38B	1	1	1	0	1	Yes
1831	CESC	Female	TCGA-C5-A1BK	TCGA-C5-A1BK-01B-11R-A13Y-07	TCGA-C5-A1BK-01B	TP	Primary solid Tumor	A13Y	1	1	1	0	1	Yes
1832	CESC	Female	TCGA-VS-A950	TCGA-VS-A950-01A-11R-A42T-07	TCGA-VS-A950-01A	TP	Primary solid Tumor	A42T	1	1	1	0	1	Yes
1833	CESC	Female	TCGA-C5-A907	TCGA-C5-A907-01A-11R-A37O-07	TCGA-C5-A907-01A	TP	Primary solid Tumor	A37O	1	1	1	0	1	Yes
1834	CESC	Female	TCGA-Q1-A73R	TCGA-Q1-A73R-01A-11R-A33Z-07	TCGA-Q1-A73R-01A	TP	Primary solid Tumor	A33Z	1	1	1	0	1	Yes
1835	CESC	Female	TCGA-VS-A9UQ	TCGA-VS-A9UQ-01A-21R-A42T-07	TCGA-VS-A9UQ-01A	TP	Primary solid Tumor	A42T	1	1	1	0	1	Yes
1836	CESC	Female	TCGA-C5-A1BQ	TCGA-C5-A1BQ-01C-11R-A213-07	TCGA-C5-A1BQ-01C	TP	Primary solid Tumor	A213	1	1	1	0	1	Yes
1837	CESC	Female	TCGA-WL-A834	TCGA-WL-A834-01A-11R-A352-07	TCGA-WL-A834-01A	TP	Primary solid Tumor	A352	1	1	1	0	1	Yes
1838	CESC	Female	TCGA-EA-A3HT	TCGA-EA-A3HT-01A-61R-A21T-07	TCGA-EA-A3HT-01A	TP	Primary solid Tumor	A21T	1	1	1	0	1	Yes
1839	CESC	Female	TCGA-DS-A1OA	TCGA-DS-A1OA-01A-11R-A14Y-07	TCGA-DS-A1OA-01A	TP	Primary solid Tumor	A14Y	1	1	1	0	1	Yes
1840	CESC	Female	TCGA-DR-A0ZM	TCGA-DR-A0ZM-01A-12R-A10U-07	TCGA-DR-A0ZM-01A	TP	Primary solid Tumor	A10U	1	1	1	0	1	Yes
1841	CESC	Female	TCGA-Q1-A73O	TCGA-Q1-A73O-01A-11R-A32P-07	TCGA-Q1-A73O-01A	TP	Primary solid Tumor	A32P	1	1	1	0	1	Yes
1842	CESC	Female	TCGA-VS-A9UV	TCGA-VS-A9UV-01A-11R-A42T-07	TCGA-VS-A9UV-01A	TP	Primary solid Tumor	A42T	1	1	1	0	1	Yes
1843	CESC	Female	TCGA-JW-AAVH	TCGA-JW-AAVH-01A-11R-A38B-07	TCGA-JW-AAVH-01A	TP	Primary solid Tumor	A38B	1	1	1	0	1	Yes
1844	CESC	Female	TCGA-2W-A8YY	TCGA-2W-A8YY-01A-11R-A37O-07	TCGA-2W-A8YY-01A	TP	Primary solid Tumor	A37O	1	1	1	0	1	Yes
1845	CESC	Female	TCGA-4J-AA1J	TCGA-4J-AA1J-01A-21R-A38B-07	TCGA-4J-AA1J-01A	TP	Primary solid Tumor	A38B	1	1	1	0	1	Yes
1846	CESC	Female	TCGA-VS-A952	TCGA-VS-A952-01A-11R-A38B-07	TCGA-VS-A952-01A	TP	Primary solid Tumor	A38B	1	1	1	0	1	Yes
1847	CESC	Female	TCGA-VS-A9V1	TCGA-VS-A9V1-01A-11R-A42T-07	TCGA-VS-A9V1-01A	TP	Primary solid Tumor	A42T	1	1	1	0	1	Yes
1848	CESC	Female	TCGA-EA-A4BA	TCGA-EA-A4BA-01A-21R-A26T-07	TCGA-EA-A4BA-01A	TP	Primary solid Tumor	A26T	1	1	1	0	1	Yes
1849	CESC	Female	TCGA-EA-A5FO	TCGA-EA-A5FO-01A-21R-A28H-07	TCGA-EA-A5FO-01A	TP	Primary solid Tumor	A28H	1	1	1	0	1	Yes
1850	CESC	Female	TCGA-VS-A8QF	TCGA-VS-A8QF-01A-21R-A37O-07	TCGA-VS-A8QF-01A	TP	Primary solid Tumor	A37O	1	1	1	0	1	Yes
1851	CESC	Female	TCGA-VS-A9V5	TCGA-VS-A9V5-01A-11R-A42T-07	TCGA-VS-A9V5-01A	TP	Primary solid Tumor	A42T	1	1	1	0	1	Yes
1852	CESC	Female	TCGA-HM-A4S6	TCGA-HM-A4S6-01A-11R-A26T-07	TCGA-HM-A4S6-01A	TP	Primary solid Tumor	A26T	1	1	1	0	1	Yes
1853	CESC	Female	TCGA-VS-A8QM	TCGA-VS-A8QM-01A-11R-A37O-07	TCGA-VS-A8QM-01A	TP	Primary solid Tumor	A37O	1	1	1	0	1	Yes
1854	CESC	Female	TCGA-C5-A2LV	TCGA-C5-A2LV-01A-11R-A18M-07	TCGA-C5-A2LV-01A	TP	Primary solid Tumor	A18M	1	1	1	0	1	Yes
1855	CESC	Female	TCGA-LP-A5U2	TCGA-LP-A5U2-01A-11R-A28H-07	TCGA-LP-A5U2-01A	TP	Primary solid Tumor	A28H	1	1	1	0	1	Yes
1856	CESC	Female	TCGA-EK-A2RE	TCGA-EK-A2RE-01A-11R-A18M-07	TCGA-EK-A2RE-01A	TP	Primary solid Tumor	A18M	1	1	1	0	1	Yes
1857	CESC	Female	TCGA-DS-A0VK	TCGA-DS-A0VK-01A-21R-A10U-07	TCGA-DS-A0VK-01A	TP	Primary solid Tumor	A10U	1	1	1	0	1	Yes
1858	CESC	Female	TCGA-FU-A2QG	TCGA-FU-A2QG-01A-11R-A18M-07	TCGA-FU-A2QG-01A	TP	Primary solid Tumor	A18M	1	1	1	0	1	Yes
1859	CESC	Female	TCGA-VS-A9UL	TCGA-VS-A9UL-01A-11R-A42T-07	TCGA-VS-A9UL-01A	TP	Primary solid Tumor	A42T	1	1	1	0	1	Yes
1860	CESC	Female	TCGA-DG-A2KH	TCGA-DG-A2KH-01A-21R-A22U-07	TCGA-DG-A2KH-01A	TP	Primary solid Tumor	A22U	1	1	1	0	1	Yes
1861	CESC	Female	TCGA-EA-A6QX	TCGA-EA-A6QX-01A-12R-A33Z-07	TCGA-EA-A6QX-01A	TP	Primary solid Tumor	A33Z	1	1	1	0	1	Yes
1862	CESC	Female	TCGA-C5-A7CK	TCGA-C5-A7CK-01A-11R-A32P-07	TCGA-C5-A7CK-01A	TP	Primary solid Tumor	A32P	1	1	1	0	1	Yes
1863	CESC	Female	TCGA-VS-A9U5	TCGA-VS-A9U5-01A-11R-A42T-07	TCGA-VS-A9U5-01A	TP	Primary solid Tumor	A42T	1	1	1	0	1	Yes
1864	CESC	Female	TCGA-JW-A5VL	TCGA-JW-A5VL-01A-11R-A28H-07	TCGA-JW-A5VL-01A	TP	Primary solid Tumor	A28H	1	1	1	0	1	Yes
1865	CESC	Female	TCGA-EA-A97N	TCGA-EA-A97N-01A-11R-A38B-07	TCGA-EA-A97N-01A	TP	Primary solid Tumor	A38B	1	1	1	0	1	Yes
1866	CESC	Female	TCGA-VS-A9U6	TCGA-VS-A9U6-01A-11R-A42T-07	TCGA-VS-A9U6-01A	TP	Primary solid Tumor	A42T	1	1	1	0	1	Yes
1867	CESC	Female	TCGA-C5-A1BE	TCGA-C5-A1BE-01B-11R-A13Y-07	TCGA-C5-A1BE-01B	TP	Primary solid Tumor	A13Y	1	1	1	0	1	Yes
1868	CESC	Female	TCGA-Q1-A6DW	TCGA-Q1-A6DW-01A-11R-A32P-07	TCGA-Q1-A6DW-01A	TP	Primary solid Tumor	A32P	1	1	1	0	1	Yes
1869	CESC	Female	TCGA-C5-A7UC	TCGA-C5-A7UC-01A-11R-A352-07	TCGA-C5-A7UC-01A	TP	Primary solid Tumor	A352	1	1	1	0	1	Yes
1870	CESC	Female	TCGA-C5-A2LY	TCGA-C5-A2LY-01A-31R-A18M-07	TCGA-C5-A2LY-01A	TP	Primary solid Tumor	A18M	1	1	1	0	1	Yes
1871	CESC	Female	TCGA-IR-A3LK	TCGA-IR-A3LK-01A-12R-A213-07	TCGA-IR-A3LK-01A	TP	Primary solid Tumor	A213	1	1	1	0	1	Yes
1872	CESC	Female	TCGA-VS-A94Z	TCGA-VS-A94Z-01A-11R-A38B-07	TCGA-VS-A94Z-01A	TP	Primary solid Tumor	A38B	1	1	1	0	1	Yes
1873	CESC	Female	TCGA-C5-A7X3	TCGA-C5-A7X3-01A-11R-A352-07	TCGA-C5-A7X3-01A	TP	Primary solid Tumor	A352	1	1	1	0	1	Yes
1874	CESC	Female	TCGA-MA-AA42	TCGA-MA-AA42-01A-12R-A38B-07	TCGA-MA-AA42-01A	TP	Primary solid Tumor	A38B	1	1	1	0	1	Yes
1875	CESC	Female	TCGA-C5-A1BN	TCGA-C5-A1BN-01B-11R-A14Y-07	TCGA-C5-A1BN-01B	TP	Primary solid Tumor	A14Y	1	1	1	0	1	Yes
1876	CESC	Female	TCGA-DS-A0VN	TCGA-DS-A0VN-01A-21R-A10U-07	TCGA-DS-A0VN-01A	TP	Primary solid Tumor	A10U	1	1	1	0	1	Yes
1877	CESC	Female	TCGA-DS-A0VM	TCGA-DS-A0VM-01A-11R-A10U-07	TCGA-DS-A0VM-01A	TP	Primary solid Tumor	A10U	1	1	1	0	1	Yes
1878	CESC	Female	TCGA-EA-A3HS	TCGA-EA-A3HS-01A-11R-A213-07	TCGA-EA-A3HS-01A	TP	Primary solid Tumor	A213	1	1	1	0	1	Yes
1879	CESC	Female	TCGA-C5-A7XC	TCGA-C5-A7XC-01A-11R-A38B-07	TCGA-C5-A7XC-01A	TP	Primary solid Tumor	A38B	1	1	1	0	1	Yes
1880	CESC	Female	TCGA-EA-A3HU	TCGA-EA-A3HU-01A-11R-A213-07	TCGA-EA-A3HU-01A	TP	Primary solid Tumor	A213	1	1	1	0	1	Yes
1881	CESC	Female	TCGA-VS-A9UU	TCGA-VS-A9UU-01A-11R-A42T-07	TCGA-VS-A9UU-01A	TP	Primary solid Tumor	A42T	1	1	1	0	1	Yes
1882	CESC	Female	TCGA-HG-A2PA	TCGA-HG-A2PA-01A-11R-A213-07	TCGA-HG-A2PA-01A	TP	Primary solid Tumor	A213	1	1	1	0	1	Yes
1883	CESC	Female	TCGA-VS-A9UC	TCGA-VS-A9UC-01A-11R-A42T-07	TCGA-VS-A9UC-01A	TP	Primary solid Tumor	A42T	1	1	1	0	1	Yes
1884	CESC	Female	TCGA-EK-A2IR	TCGA-EK-A2IR-01A-11R-A180-07	TCGA-EK-A2IR-01A	TP	Primary solid Tumor	A180	1	1	1	0	1	Yes
1885	CESC	Female	TCGA-C5-A7UI	TCGA-C5-A7UI-01A-11R-A36F-07	TCGA-C5-A7UI-01A	TP	Primary solid Tumor	A36F	1	1	1	0	1	Yes
1886	CESC	Female	TCGA-EX-A3L1	TCGA-EX-A3L1-01A-11R-A32Y-07	TCGA-EX-A3L1-01A	TP	Primary solid Tumor	A32Y	1	1	1	0	1	Yes
1887	CESC	Female	TCGA-EK-A2PG	TCGA-EK-A2PG-01A-11R-A18M-07	TCGA-EK-A2PG-01A	TP	Primary solid Tumor	A18M	1	1	1	0	1	Yes
1888	CESC	Female	TCGA-VS-A9V3	TCGA-VS-A9V3-01A-11R-A42T-07	TCGA-VS-A9V3-01A	TP	Primary solid Tumor	A42T	1	1	1	0	1	Yes
1889	CESC	Female	TCGA-VS-A8QC	TCGA-VS-A8QC-01A-11R-A37O-07	TCGA-VS-A8QC-01A	TP	Primary solid Tumor	A37O	1	1	1	0	1	Yes
1890	CESC	Female	TCGA-EA-A44S	TCGA-EA-A44S-01A-12R-A26T-07	TCGA-EA-A44S-01A	TP	Primary solid Tumor	A26T	1	1	1	0	1	Yes
1891	CESC	Female	TCGA-LP-A4AW	TCGA-LP-A4AW-01A-11R-A24H-07	TCGA-LP-A4AW-01A	TP	Primary solid Tumor	A24H	1	1	1	0	1	Yes
1892	CESC	Female	TCGA-EK-A2R9	TCGA-EK-A2R9-01A-11R-A18M-07	TCGA-EK-A2R9-01A	TP	Primary solid Tumor	A18M	1	1	1	0	1	Yes
1893	CESC	Female	TCGA-C5-A2LT	TCGA-C5-A2LT-01A-11R-A18M-07	TCGA-C5-A2LT-01A	TP	Primary solid Tumor	A18M	1	1	1	0	1	Yes
1894	CESC	Female	TCGA-LP-A4AX	TCGA-LP-A4AX-01A-12R-A24H-07	TCGA-LP-A4AX-01A	TP	Primary solid Tumor	A24H	1	1	1	0	1	Yes
1895	CESC	Female	TCGA-EK-A2PM	TCGA-EK-A2PM-01A-11R-A18M-07	TCGA-EK-A2PM-01A	TP	Primary solid Tumor	A18M	1	1	1	0	1	Yes
1896	CESC	Female	TCGA-LP-A5U3	TCGA-LP-A5U3-01A-11R-A28H-07	TCGA-LP-A5U3-01A	TP	Primary solid Tumor	A28H	1	1	1	0	1	Yes
1897	CESC	Female	TCGA-ZJ-AAX4	TCGA-ZJ-AAX4-01A-11R-A42T-07	TCGA-ZJ-AAX4-01A	TP	Primary solid Tumor	A42T	1	1	1	0	1	Yes
1898	CESC	Female	TCGA-C5-A2LZ	TCGA-C5-A2LZ-01A-11R-A213-07	TCGA-C5-A2LZ-01A	TP	Primary solid Tumor	A213	1	1	1	0	1	Yes
1899	CESC	Female	TCGA-IR-A3LH	TCGA-IR-A3LH-01A-21R-A213-07	TCGA-IR-A3LH-01A	TP	Primary solid Tumor	A213	1	1	1	0	1	Yes
1900	CESC	Female	TCGA-EA-A5ZF	TCGA-EA-A5ZF-01A-11R-A28H-07	TCGA-EA-A5ZF-01A	TP	Primary solid Tumor	A28H	1	1	1	0	1	Yes
1901	CESC	Female	TCGA-MA-AA3Y	TCGA-MA-AA3Y-01A-11R-A38B-07	TCGA-MA-AA3Y-01A	TP	Primary solid Tumor	A38B	1	1	1	0	1	Yes
1902	CESC	Female	TCGA-FU-A3HZ	TCGA-FU-A3HZ-01A-11R-A213-07	TCGA-FU-A3HZ-01A	TP	Primary solid Tumor	A213	1	1	1	0	1	Yes
1903	CESC	Female	TCGA-FU-A3EO	TCGA-FU-A3EO-01A-11R-A213-07	TCGA-FU-A3EO-01A	TP	Primary solid Tumor	A213	1	1	1	0	1	Yes
1904	CESC	Female	TCGA-FU-A3NI	TCGA-FU-A3NI-01A-11R-A21T-07	TCGA-FU-A3NI-01A	TP	Primary solid Tumor	A21T	1	1	1	0	1	Yes
1905	CESC	Female	TCGA-MY-A5BE	TCGA-MY-A5BE-01A-21R-A26T-07	TCGA-MY-A5BE-01A	TP	Primary solid Tumor	A26T	1	1	1	0	1	Yes
1906	CESC	Female	TCGA-MY-A5BF	TCGA-MY-A5BF-01A-11R-A26T-07	TCGA-MY-A5BF-01A	TP	Primary solid Tumor	A26T	1	1	1	0	1	Yes
1907	CESC	Female	TCGA-EK-A3GN	TCGA-EK-A3GN-01A-11R-A213-07	TCGA-EK-A3GN-01A	TP	Primary solid Tumor	A213	1	1	1	0	1	Yes
1908	CESC	Female	TCGA-C5-A0TN	TCGA-C5-A0TN-01A-21R-A14Y-07	TCGA-C5-A0TN-01A	TP	Primary solid Tumor	A14Y	1	1	1	0	1	Yes
1909	CESC	Female	TCGA-ZJ-A8QR	TCGA-ZJ-A8QR-01A-11R-A37O-07	TCGA-ZJ-A8QR-01A	TP	Primary solid Tumor	A37O	1	1	1	0	1	Yes
1910	CESC	Female	TCGA-VS-A9V0	TCGA-VS-A9V0-01A-11R-A42T-07	TCGA-VS-A9V0-01A	TP	Primary solid Tumor	A42T	1	1	1	0	1	Yes
1911	CESC	Female	TCGA-IR-A3LL	TCGA-IR-A3LL-01A-11R-A213-07	TCGA-IR-A3LL-01A	TP	Primary solid Tumor	A213	1	1	1	0	1	Yes
1912	CESC	Female	TCGA-EK-A2IP	TCGA-EK-A2IP-01A-11R-A180-07	TCGA-EK-A2IP-01A	TP	Primary solid Tumor	A180	1	1	1	0	1	Yes
1913	CESC	Female	TCGA-MA-AA3X	TCGA-MA-AA3X-01A-22R-A42S-07	TCGA-MA-AA3X-01A	TP	Primary solid Tumor	A42S	1	1	1	0	1	Yes
1914	CESC	Female	TCGA-EX-A1H6	TCGA-EX-A1H6-01B-11R-A22U-07	TCGA-EX-A1H6-01B	TP	Primary solid Tumor	A22U	1	1	1	0	1	Yes
1915	CESC	Female	TCGA-MA-AA41	TCGA-MA-AA41-01A-11R-A38B-07	TCGA-MA-AA41-01A	TP	Primary solid Tumor	A38B	1	1	1	0	1	Yes
1916	CESC	Female	TCGA-C5-A7X5	TCGA-C5-A7X5-01A-11R-A36F-07	TCGA-C5-A7X5-01A	TP	Primary solid Tumor	A36F	1	1	1	0	1	Yes
1917	CESC	Female	TCGA-EA-A3HR	TCGA-EA-A3HR-01A-11R-A213-07	TCGA-EA-A3HR-01A	TP	Primary solid Tumor	A213	1	1	1	0	1	Yes
1918	CESC	Female	TCGA-EK-A2R7	TCGA-EK-A2R7-01A-11R-A18M-07	TCGA-EK-A2R7-01A	TP	Primary solid Tumor	A18M	1	1	1	0	1	Yes
1919	CESC	Female	TCGA-EK-A2PK	TCGA-EK-A2PK-01A-11R-A18M-07	TCGA-EK-A2PK-01A	TP	Primary solid Tumor	A18M	1	1	1	0	1	Yes
1920	CESC	Female	TCGA-EA-A1QS	TCGA-EA-A1QS-01A-61R-A22U-07	TCGA-EA-A1QS-01A	TP	Primary solid Tumor	A22U	1	1	1	0	1	Yes
1921	CESC	Female	TCGA-EA-A3QE	TCGA-EA-A3QE-01A-21R-A21T-07	TCGA-EA-A3QE-01A	TP	Primary solid Tumor	A21T	1	1	1	0	1	Yes
1922	CESC	Female	TCGA-EA-A3Y4	TCGA-EA-A3Y4-01A-51R-A24H-07	TCGA-EA-A3Y4-01A	TP	Primary solid Tumor	A24H	1	1	1	0	1	Yes
1923	CESC	Female	TCGA-FU-A40J	TCGA-FU-A40J-01A-11R-A24H-07	TCGA-FU-A40J-01A	TP	Primary solid Tumor	A24H	1	1	1	0	1	Yes
1924	CESC	Female	TCGA-VS-A9UY	TCGA-VS-A9UY-01A-11R-A42T-07	TCGA-VS-A9UY-01A	TP	Primary solid Tumor	A42T	1	1	1	0	1	Yes
1925	CESC	Female	TCGA-EA-A5ZD	TCGA-EA-A5ZD-01A-11R-A28H-07	TCGA-EA-A5ZD-01A	TP	Primary solid Tumor	A28H	1	1	1	0	1	Yes
1926	CESC	Female	TCGA-EK-A2H0	TCGA-EK-A2H0-01A-11R-A180-07	TCGA-EK-A2H0-01A	TP	Primary solid Tumor	A180	1	1	1	0	1	Yes
1927	CESC	Female	TCGA-EA-A5ZE	TCGA-EA-A5ZE-01A-11R-A28H-07	TCGA-EA-A5ZE-01A	TP	Primary solid Tumor	A28H	1	1	1	0	1	Yes
1928	CESC	Female	TCGA-VS-A8Q8	TCGA-VS-A8Q8-01A-11R-A37O-07	TCGA-VS-A8Q8-01A	TP	Primary solid Tumor	A37O	1	1	1	0	1	Yes
1929	CESC	Female	TCGA-EA-A50E	TCGA-EA-A50E-01A-21R-A26T-07	TCGA-EA-A50E-01A	TP	Primary solid Tumor	A26T	1	1	1	0	1	Yes
1930	CESC	Female	TCGA-C5-A1MP	TCGA-C5-A1MP-01A-11R-A14Y-07	TCGA-C5-A1MP-01A	TP	Primary solid Tumor	A14Y	1	1	1	0	1	Yes
1931	CESC	Female	TCGA-MY-A5BD	TCGA-MY-A5BD-01A-11R-A26T-07	TCGA-MY-A5BD-01A	TP	Primary solid Tumor	A26T	1	1	1	0	1	Yes
1932	CESC	Female	TCGA-ZJ-AAXB	TCGA-ZJ-AAXB-01A-11R-A42T-07	TCGA-ZJ-AAXB-01A	TP	Primary solid Tumor	A42T	1	1	1	0	1	Yes
1933	CESC	Female	TCGA-HM-A3JK	TCGA-HM-A3JK-01A-11R-A32Y-07	TCGA-HM-A3JK-01A	TP	Primary solid Tumor	A32Y	1	1	1	0	1	Yes
1934	CESC	Female	TCGA-VS-AA62	TCGA-VS-AA62-01A-11R-A42T-07	TCGA-VS-AA62-01A	TP	Primary solid Tumor	A42T	1	1	1	0	1	Yes
1935	CESC	Female	TCGA-EK-A2PL	TCGA-EK-A2PL-01A-11R-A18M-07	TCGA-EK-A2PL-01A	TP	Primary solid Tumor	A18M	1	1	1	0	1	Yes
1936	CESC	Female	TCGA-EA-A3QD	TCGA-EA-A3QD-01A-32R-A22U-07	TCGA-EA-A3QD-01A	TP	Primary solid Tumor	A22U	1	1	1	0	1	Yes
1937	CESC	Female	TCGA-FU-A57G	TCGA-FU-A57G-01A-11R-A26T-07	TCGA-FU-A57G-01A	TP	Primary solid Tumor	A26T	1	1	1	0	1	Yes
1938	CESC	Female	TCGA-MA-AA3W	TCGA-MA-AA3W-01A-11R-A38B-07	TCGA-MA-AA3W-01A	TP	Primary solid Tumor	A38B	1	1	1	0	1	Yes
1939	CESC	Female	TCGA-C5-A7UH	TCGA-C5-A7UH-01A-11R-A352-07	TCGA-C5-A7UH-01A	TP	Primary solid Tumor	A352	1	1	1	0	1	Yes
1940	CESC	Female	TCGA-JX-A3Q0	TCGA-JX-A3Q0-01A-11R-A32Y-07	TCGA-JX-A3Q0-01A	TP	Primary solid Tumor	A32Y	1	1	1	0	1	Yes
1941	CESC	Female	TCGA-JX-A3Q8	TCGA-JX-A3Q8-01A-11R-A21T-07	TCGA-JX-A3Q8-01A	TP	Primary solid Tumor	A21T	1	1	1	0	1	Yes
1942	CESC	Female	TCGA-EA-A78R	TCGA-EA-A78R-01A-11R-A32P-07	TCGA-EA-A78R-01A	TP	Primary solid Tumor	A32P	1	1	1	0	1	Yes
1943	CESC	Female	TCGA-ZJ-AAX8	TCGA-ZJ-AAX8-01A-11R-A42T-07	TCGA-ZJ-AAX8-01A	TP	Primary solid Tumor	A42T	1	1	1	0	1	Yes
1944	CESC	Female	TCGA-VS-A8QA	TCGA-VS-A8QA-01A-11R-A37O-07	TCGA-VS-A8QA-01A	TP	Primary solid Tumor	A37O	1	1	1	0	1	Yes
1945	CESC	Female	TCGA-LP-A4AV	TCGA-LP-A4AV-01A-11R-A32Y-07	TCGA-LP-A4AV-01A	TP	Primary solid Tumor	A32Y	1	1	1	0	1	Yes
1946	CESC	Female	TCGA-EA-A3HQ	TCGA-EA-A3HQ-01A-11R-A213-07	TCGA-EA-A3HQ-01A	TP	Primary solid Tumor	A213	1	1	1	0	1	Yes
1947	CESC	Female	TCGA-ZJ-A8QQ	TCGA-ZJ-A8QQ-01A-11R-A37O-07	TCGA-ZJ-A8QQ-01A	TP	Primary solid Tumor	A37O	1	1	1	0	1	Yes
1948	CESC	Female	TCGA-EK-A3GM	TCGA-EK-A3GM-01A-11R-A213-07	TCGA-EK-A3GM-01A	TP	Primary solid Tumor	A213	1	1	1	0	1	Yes
1949	CESC	Female	TCGA-EK-A2PI	TCGA-EK-A2PI-01A-11R-A18M-07	TCGA-EK-A2PI-01A	TP	Primary solid Tumor	A18M	1	1	1	0	1	Yes
1950	CESC	Female	TCGA-C5-A8XK	TCGA-C5-A8XK-01A-11R-A37O-07	TCGA-C5-A8XK-01A	TP	Primary solid Tumor	A37O	1	1	1	0	1	Yes
1951	CESC	Female	TCGA-EK-A2GZ	TCGA-EK-A2GZ-01A-11R-A180-07	TCGA-EK-A2GZ-01A	TP	Primary solid Tumor	A180	1	1	1	0	1	Yes
1952	CESC	Female	TCGA-C5-A1MH	TCGA-C5-A1MH-01A-11R-A14Y-07	TCGA-C5-A1MH-01A	TP	Primary solid Tumor	A14Y	1	1	1	0	1	Yes
1953	CESC	Female	TCGA-VS-A9UZ	TCGA-VS-A9UZ-01A-11R-A42T-07	TCGA-VS-A9UZ-01A	TP	Primary solid Tumor	A42T	1	1	1	0	1	Yes
1954	CESC	Female	TCGA-DS-A7WI	TCGA-DS-A7WI-01A-12R-A352-07	TCGA-DS-A7WI-01A	TP	Primary solid Tumor	A352	1	1	1	0	1	Yes
1955	CESC	Female	TCGA-C5-A1BM	TCGA-C5-A1BM-01A-11R-A13Y-07	TCGA-C5-A1BM-01A	TP	Primary solid Tumor	A13Y	1	1	1	0	1	Yes
1956	CESC	Female	TCGA-VS-A8Q9	TCGA-VS-A8Q9-01A-12R-A37O-07	TCGA-VS-A8Q9-01A	TP	Primary solid Tumor	A37O	1	1	1	0	1	Yes
1957	CESC	Female	TCGA-VS-A9V2	TCGA-VS-A9V2-01A-11R-A42T-07	TCGA-VS-A9V2-01A	TP	Primary solid Tumor	A42T	1	1	1	0	1	Yes
1958	CESC	Female	TCGA-VS-A9V4	TCGA-VS-A9V4-01A-12R-A42T-07	TCGA-VS-A9V4-01A	TP	Primary solid Tumor	A42T	1	1	1	0	1	Yes
1959	CESC	Female	TCGA-LP-A4AU	TCGA-LP-A4AU-01A-32R-A32Y-07	TCGA-LP-A4AU-01A	TP	Primary solid Tumor	A32Y	1	1	1	0	1	Yes
1960	CESC	Female	TCGA-ZJ-AAXJ	TCGA-ZJ-AAXJ-01A-11R-A42T-07	TCGA-ZJ-AAXJ-01A	TP	Primary solid Tumor	A42T	1	1	1	0	1	Yes
1961	CESC	Female	TCGA-EA-A1QT	TCGA-EA-A1QT-01A-11R-A14Y-07	TCGA-EA-A1QT-01A	TP	Primary solid Tumor	A14Y	1	1	1	0	1	Yes
1962	CESC	Female	TCGA-FU-A3TX	TCGA-FU-A3TX-01A-11R-A22U-07	TCGA-FU-A3TX-01A	TP	Primary solid Tumor	A22U	1	1	1	0	1	Yes
1963	CESC	Female	TCGA-FU-A3YQ	TCGA-FU-A3YQ-01A-11R-A22U-07	TCGA-FU-A3YQ-01A	TP	Primary solid Tumor	A22U	1	1	1	0	1	Yes
1964	CESC	Female	TCGA-ZJ-A8QO	TCGA-ZJ-A8QO-01A-11R-A37O-07	TCGA-ZJ-A8QO-01A	TP	Primary solid Tumor	A37O	1	1	1	0	1	Yes
1965	CESC	Female	TCGA-VS-A9UB	TCGA-VS-A9UB-01A-22R-A42T-07	TCGA-VS-A9UB-01A	TP	Primary solid Tumor	A42T	1	1	1	0	1	Yes
1966	CESC	Female	TCGA-IR-A3LI	TCGA-IR-A3LI-01A-11R-A32Y-07	TCGA-IR-A3LI-01A	TP	Primary solid Tumor	A32Y	1	1	1	0	1	Yes
1967	CESC	Female	TCGA-IR-A3LF	TCGA-IR-A3LF-01A-21R-A22U-07	TCGA-IR-A3LF-01A	TP	Primary solid Tumor	A22U	1	1	1	0	1	Yes
1968	CESC	Female	TCGA-C5-A1MJ	TCGA-C5-A1MJ-01A-11R-A14Y-07	TCGA-C5-A1MJ-01A	TP	Primary solid Tumor	A14Y	1	1	1	0	1	Yes
1969	CESC	Female	TCGA-LP-A7HU	TCGA-LP-A7HU-01A-11R-A33Z-07	TCGA-LP-A7HU-01A	TP	Primary solid Tumor	A33Z	1	1	1	0	1	Yes
1970	CESC	Female	TCGA-ZJ-AAXA	TCGA-ZJ-AAXA-01A-11R-A42T-07	TCGA-ZJ-AAXA-01A	TP	Primary solid Tumor	A42T	1	1	1	0	1	Yes
1971	CESC	Female	TCGA-VS-A8EK	TCGA-VS-A8EK-01A-12R-A37O-07	TCGA-VS-A8EK-01A	TP	Primary solid Tumor	A37O	1	1	1	0	1	Yes
1972	CESC	Female	TCGA-HM-A3JJ	TCGA-HM-A3JJ-11A-12R-A21T-07	TCGA-HM-A3JJ-11A	NT	Solid Tissue Normal	A21T	1	1	1	0	1	Yes
1973	CESC	Female	TCGA-EK-A2R8	TCGA-EK-A2R8-01A-21R-A18M-07	TCGA-EK-A2R8-01A	TP	Primary solid Tumor	A18M	1	1	1	0	1	Yes
1974	CESC	Female	TCGA-C5-A2LS	TCGA-C5-A2LS-01A-22R-A22U-07	TCGA-C5-A2LS-01A	TP	Primary solid Tumor	A22U	1	1	1	0	1	Yes
1975	CESC	Female	TCGA-C5-A8XH	TCGA-C5-A8XH-01A-11R-A37O-07	TCGA-C5-A8XH-01A	TP	Primary solid Tumor	A37O	1	1	1	0	1	Yes
1976	CESC	Female	TCGA-ZJ-AB0H	TCGA-ZJ-AB0H-01A-11R-A42T-07	TCGA-ZJ-AB0H-01A	TP	Primary solid Tumor	A42T	1	1	1	0	1	Yes
1977	CESC	Female	TCGA-C5-A8XI	TCGA-C5-A8XI-01A-11R-A37O-07	TCGA-C5-A8XI-01A	TP	Primary solid Tumor	A37O	1	1	1	0	1	Yes
1978	CESC	Female	TCGA-C5-A1ME	TCGA-C5-A1ME-01A-11R-A13Y-07	TCGA-C5-A1ME-01A	TP	Primary solid Tumor	A13Y	1	1	1	0	1	Yes
1979	CESC	Female	TCGA-DS-A5RQ	TCGA-DS-A5RQ-01A-11R-A28H-07	TCGA-DS-A5RQ-01A	TP	Primary solid Tumor	A28H	1	1	1	0	1	Yes
1980	CESC	Female	TCGA-DS-A7WH	TCGA-DS-A7WH-01A-22R-A352-07	TCGA-DS-A7WH-01A	TP	Primary solid Tumor	A352	1	1	1	0	1	Yes
1981	CESC	Female	TCGA-JX-A3PZ	TCGA-JX-A3PZ-01A-11R-A32Y-07	TCGA-JX-A3PZ-01A	TP	Primary solid Tumor	A32Y	1	1	1	0	1	Yes
1982	CESC	Female	TCGA-MA-AA3Z	TCGA-MA-AA3Z-01A-11R-A38B-07	TCGA-MA-AA3Z-01A	TP	Primary solid Tumor	A38B	1	1	1	0	1	Yes
1983	CESC	Female	TCGA-BI-A20A	TCGA-BI-A20A-01A-11R-A14Y-07	TCGA-BI-A20A-01A	TP	Primary solid Tumor	A14Y	1	1	1	0	1	Yes
1984	CESC	Female	TCGA-VS-A8EL	TCGA-VS-A8EL-01A-11R-A37O-07	TCGA-VS-A8EL-01A	TP	Primary solid Tumor	A37O	1	1	1	0	1	Yes
1985	CESC	Female	TCGA-EA-A439	TCGA-EA-A439-01A-11R-A24H-07	TCGA-EA-A439-01A	TP	Primary solid Tumor	A24H	1	1	1	0	1	Yes
1986	CESC	Female	TCGA-JX-A5QV	TCGA-JX-A5QV-01A-22R-A28H-07	TCGA-JX-A5QV-01A	TP	Primary solid Tumor	A28H	1	1	1	0	1	Yes
1987	CESC	Female	TCGA-FU-A3TQ	TCGA-FU-A3TQ-01A-11R-A22U-07	TCGA-FU-A3TQ-01A	TP	Primary solid Tumor	A22U	1	1	1	0	1	Yes
1988	CESC	Female	TCGA-C5-A1MQ	TCGA-C5-A1MQ-01A-11R-A14Y-07	TCGA-C5-A1MQ-01A	TP	Primary solid Tumor	A14Y	1	1	1	0	1	Yes
1989	CESC	Female	TCGA-ZJ-AAXN	TCGA-ZJ-AAXN-01A-11R-A42T-07	TCGA-ZJ-AAXN-01A	TP	Primary solid Tumor	A42T	1	1	1	0	1	Yes
1990	CESC	Female	TCGA-FU-A3WB	TCGA-FU-A3WB-01A-11R-A22U-07	TCGA-FU-A3WB-01A	TP	Primary solid Tumor	A22U	1	1	1	0	1	Yes
1991	CESC	Female	TCGA-VS-A9U7	TCGA-VS-A9U7-01A-11R-A42T-07	TCGA-VS-A9U7-01A	TP	Primary solid Tumor	A42T	1	1	1	0	1	Yes
1992	CESC	Female	TCGA-IR-A3L7	TCGA-IR-A3L7-01A-21R-A213-07	TCGA-IR-A3L7-01A	TP	Primary solid Tumor	A213	1	1	1	0	1	Yes
1993	CESC	Female	TCGA-IR-A3LB	TCGA-IR-A3LB-01A-11R-A24H-07	TCGA-IR-A3LB-01A	TP	Primary solid Tumor	A24H	1	1	1	0	1	Yes
1994	CESC	Female	TCGA-EX-A1H5	TCGA-EX-A1H5-01A-31R-A13Y-07	TCGA-EX-A1H5-01A	TP	Primary solid Tumor	A13Y	1	1	1	0	1	Yes
1995	CESC	Female	TCGA-C5-A905	TCGA-C5-A905-01A-11R-A37O-07	TCGA-C5-A905-01A	TP	Primary solid Tumor	A37O	1	1	1	0	1	Yes
1996	CESC	Female	TCGA-DS-A3LQ	TCGA-DS-A3LQ-01A-21R-A21T-07	TCGA-DS-A3LQ-01A	TP	Primary solid Tumor	A21T	1	1	1	0	1	Yes
1997	CESC	Female	TCGA-XS-A8TJ	TCGA-XS-A8TJ-01A-11R-A36F-07	TCGA-XS-A8TJ-01A	TP	Primary solid Tumor	A36F	1	1	1	0	1	Yes
1998	CESC	Female	TCGA-C5-A1MI	TCGA-C5-A1MI-01A-11R-A14Y-07	TCGA-C5-A1MI-01A	TP	Primary solid Tumor	A14Y	1	1	1	0	1	Yes
1999	CESC	Female	TCGA-C5-A1ML	TCGA-C5-A1ML-01A-11R-A14Y-07	TCGA-C5-A1ML-01A	TP	Primary solid Tumor	A14Y	1	1	1	0	1	Yes
[truncated: 9,094 more rows]

## Sheet: TableS3
Software	Version	URL	Reference	DOI	Use.in.analysis
OptiType	1.3.2	https://github.com/FRED-2/OptiType	Szolek et al. 2014. Bioinformatics.	10.1093/bioinformatics/btu548	HLA genotype calling from WES BAM files
xCell	1.1.0	https://github.com/dviraran/xCell	Aran et al. 2017. Genome Biology.	10.1186/s13059-017-1349-1	Deconvolution and ssGSEA of 64 immune and stroma cell types
Caret	6.0-84	http://topepo.github.io/caret/index.html	Kuhn. 2008. J of Statistical Software.	10.18637/jss.v028.i05	LASSO regression
R	3.6.1	https://www.r-project.org/	-	-	All analysis
Bioconductor	release 3.10	https://www.bioconductor.org/	-	-	All analysis
Data type or Database name	File or Study name	URL	Reference	DOI	Use.in.analysis
Demographic and clinical	TCGA-CDR.txt	https://api.gdc.cancer.gov/data/1b5f413e-a8d1-4d10-92eb-7c4ae739ed81	Liu et al. 2018. Cell.	10.1016/j.cell.2018.02.052	Clinical correlates
Normalized and batch corrected RSEM RNAseq files	EBPlusPlusAdjustPANCAN_IlluminaHiSeq_RNASeqV2.geneExp.tsv	http://api.gdc.cancer.gov/data/3586c0da-64d0-4b74-a449-5ff4d9136611	The PanCancer Atlas consortium.	-	All analysis
FPKM RNAseq files	GDC	https://portal.gdc.cancer.gov/	Zhang et al. 2019. Biorxiv.	10.1101/788919	Immune and stroma cell subset correlates
Whole-exome sequencing BAM files	GDC	https://portal.gdc.cancer.gov/	Zhang et al. 2019. Biorxiv.	10.1101/788919	HLA correlates
Viral presence	viral.tsv	https://api.gdc.cancer.gov/data/a55229b3-da03-49fc-a310-9b1bf16b8512	Thorsson et al. 2018. Immunity.	10.1016/j.immuni.2018.03.023	Viral correlates
Microbiome	Kraken-TCGA-Voom-SNM-Plate-Center-Filtering-Data.csv	ftp://ftp.microbio.me/pub/cancer_microbiome_analysis/TCGA/Kraken/Kraken-TCGA-Voom-SNM-Plate-Center-Filtering-Data.csv	Poore et al. 2020. Nature.	10.1038/s41586-020-2095-1	Microbiota correlates
Single Cell Portal (Broad's Institute)	Single cell RNA-seq of adult and pediatric glioblastoma (24,131 cells)	https://singlecell.broadinstitute.org/single_cell/study/SCP393/single-cell-rna-seq-of-adult-and-pediatric-glioblastoma	Neftel et al. 2019. Cell.	10.1016/j.cell.2019.06.024	Single cell exploration of ACE2 and TMPRSS2 gene expression
Single Cell Portal (Broad's Institute)	Melanoma immunotherapy resistance (39,744 cells)	https://singlecell.broadinstitute.org/single_cell/study/SCP109/melanoma-immunotherapy-resistance	Jerby-Arnon et al. 2019. Cell.	10.1016/j.cell.2018.09.006	Single cell exploration of ACE2 and TMPRSS2 gene expression
Single Cell Portal (Broad's Institute)	Melanoma intra-tumor heterogeneity (44,645 cells)	https://singlecell.broadinstitute.org/single_cell/study/SCP11/melanoma-intra-tumor-heterogeneity	Tirosh et al. 2016. Science.	10.1126/science.aad0501	Single cell exploration of ACE2 and TMPRSS2 gene expression
Single Cell hosted on NCBI GEO	Single-Cell Transcriptomic Analysis of Primary and Metastatic Tumor Ecosystems in Head and Neck Cancer (5,902 cells)	https://www.ncbi.nlm.nih.gov/geo/query/acc.cgi?acc=GSE103322	Puram et al. 2017. Cell.	10.1016/j.cell.2017.10.044	Single cell exploration of ACE2 and TMPRSS2 gene expression
Human Imune Cell Atlas	Peripheral blood mononuclear cells (PBMCs) (13,316 cells)	https://singlecell.broadinstitute.org/single_cell/study/SCP345/ica-blood-mononuclear-cells-2-donors-2-sites?scpbr=immune-cell-atlas	-	-	Single cell exploration of ACE2 and TMPRSS2 gene expression
Human Imune Cell Atlas	Ileum Lamina Propria Immunocytes (Sinai) (39,563 cells)	https://singlecell.broadinstitute.org/single_cell/study/SCP359/ica-ileum-lamina-propria-immunocytes-sinai?scpbr=immune-cell-atlas	-	-	Single cell exploration of ACE2 and TMPRSS2 gene expression
Single Cell Expression Atlas	Census of Immune Cells: Single-cell RNA-Seq mRNA baseline (594,857 cells)	https://www.ebi.ac.uk/gxa/sc/experiments/E-HCAD-4/results/tsne	-	-	Single cell exploration of ACE2 and TMPRSS2 gene expression
Human Cell Landscape	Human Cell Landscape (702,968 cells)	http://bis.zju.edu.cn/HCL/	Han et al. 2020. Nature.	10.1038/s41586-020-2157-4	Single cell exploration of ACE2 and TMPRSS2 gene expression
Single Cell hosted on Zenodo	Single cell and immune repertoire profiling of COVID-19 patients reveal novel therapeutic candidates (140,956 cells)	https://zenodo.org/record/3747336#.XqGFqshKhPY	Quinghua Jiang. 2020. Zenodo.	10.5281/zenodo.3747336	Single cell exploration of ACE2 and TMPRSS2 gene expression

## Sheet: TableS4
Gene	Clinical.feature	Sample.type	Sample.total	Sample.total.wData	Group1	Group2	Group3	Group4	Group5	Group1.samples	Group2.samples	Group3.samples	Group4.samples	Group5.samples	Group1.isNA.samples	Group2.isNA.samples	Group3.isNA.samples	Group4.isNA.samples	Group5.isNA.samples	term.1	df.1	sumsq.1	meansq.1	statistic.1	p.value.1	term.2	df.2	sumsq.2	meansq.2	statistic.2	p.value.2	term.3	df.3	sumsq.3	meansq.3	statistic.3	p.value.3	term.4	df.4	sumsq.4	meansq.4	statistic.4	p.value.4	p.adj.1	p.adj.2	p.adj.3
ACE2	gender	Normal	708	708	FEMALE	MALE	NA	NA	NA	362	346	NA	NA	NA	0	0	NA	NA	NA	Cancer	22	2351.22	106.874	42.8761	5.94e-112	gender	1	4.89418	4.89418	1.96347	0.161608	Cancer:gender	17	100.409	5.90643	2.36957	0.00149742	Residuals	667	1662.58	2.49262	NA	NA	1.11e-111	0.365398	0.00381161
ACE2	gender	Tumor	10022	10022	FEMALE	MALE	NA	NA	NA	5135	4887	NA	NA	NA	0	0	NA	NA	NA	Cancer	33	51624.5	1564.38	468.946	0	gender	1	18.0815	18.0815	5.42018	0.0199252	Cancer:gender	27	214.463	7.94306	2.38105	7.32e-05	Residuals	9960	33226.1	3.33595	NA	NA	0	0.10035	0.00022779
ACE2	age.group	Normal	708	686	younger	older	NA	NA	NA	389	297	NA	NA	NA	0	0	NA	NA	NA	Cancer	22	2262.15	102.825	39.1274	3.09e-103	age.group	1	0.00419134	0.00419134	0.00159491	0.968156	Cancer:age.group	18	38.8885	2.16047	0.822113	0.674866	Residuals	644	1692.4	2.62795	NA	NA	4.55e-103	0.968156	0.699861
ACE2	age.group	Tumor	10022	9710	younger	older	NA	NA	NA	6124	3586	NA	NA	NA	0	0	NA	NA	NA	Cancer	33	50075.8	1517.45	454.413	0	age.group	1	0.180984	0.180984	0.0541971	0.81592	Cancer:age.group	33	179.02	5.42486	1.62452	0.0133089	Residuals	9642	32198.1	3.33936	NA	NA	0	0.934166	0.0248433
ACE2	race	Normal	708	644	AA	ASIAN	WHITE	NA	NA	48	20	576	NA	NA	0	0	0	NA	NA	Cancer	22	1992.23	90.5561	36.033	1.78e-94	race	2	8.94327	4.47163	1.7793	0.169649	Cancer:race	21	84.3141	4.01496	1.59758	0.0445104	Residuals	598	1502.86	2.51315	NA	NA	2.37e-94	0.365398	0.0655943
ACE2	race	Tumor	10022	8747	AA	ASIAN	WHITE	NA	NA	857	623	7267	NA	NA	0	0	0	NA	NA	Cancer	33	44816.1	1358.06	393.224	0	race	2	15.2991	7.64953	2.21491	0.109226	Cancer:race	63	269.918	4.28441	1.24054	0.0955702	Residuals	8648	29867.3	3.45366	NA	NA	0	0.305832	0.133798
ACE2	stage	Tumor	10730	7327	I	II	III	IV	Normal	1993	2142	1675	809	NA	0	0	0	0	NA	Cancer	27	36875	1365.74	342.004	0	stage	4	303.296	75.8239	18.9875	1.51e-15	Cancer:stage	77	1123.13	14.5861	3.65259	2.04e-24	Residuals	7218	28824	3.99335	NA	NA	0	1.41e-14	1.9e-23
ACE2	grade	Tumor	10730	4751	G1G2	G3G4	Normal	NA	NA	1871	2172	708	NA	NA	0	0	0	NA	NA	Cancer	24	17614	733.918	193.92	0	grade	2	149.098	74.549	19.6978	3.03e-09	Cancer:grade	20	317.031	15.8516	4.18839	1.12e-09	Residuals	4704	17802.9	3.78464	NA	NA	0	2.12e-08	6.28e-09
ACE2	menopause	Normal	708	108	NotPost	Post	NA	NA	NA	35	73	NA	NA	NA	0	0	NA	NA	NA	Cancer	2	2.18355	1.09177	1.25415	0.28968	menopause	1	0.555945	0.555945	0.638629	0.426065	Cancer:menopause	2	3.17393	1.58696	1.82299	0.166766	Residuals	102	88.7939	0.870529	NA	NA	0.28968	0.627885	0.212248
ACE2	menopause	Tumor	10022	1785	NotPost	Post	NA	NA	NA	519	1266	NA	NA	NA	0	0	NA	NA	NA	Cancer	3	1880.47	626.825	195.759	1.1e-109	menopause	1	0.140546	0.140546	0.043893	0.834077	Cancer:menopause	3	14.0664	4.6888	1.46432	0.222428	Residuals	1777	5690	3.20203	NA	NA	1.93e-109	0.934166	0.270781
ACE2	bmi.group	Normal	708	133	level1	level2	level3	level4	NA	47	38	19	29	NA	0	0	0	0	NA	Cancer	8	592.179	74.0224	30.9075	6.29e-24	bmi.group	3	13.2394	4.41315	1.84268	0.144217	Cancer:bmi.group	20	43.3729	2.16864	0.905501	0.581031	Residuals	101	241.891	2.39497	NA	NA	7.33e-24	0.365398	0.625726
ACE2	bmi.group	Tumor	10022	2651	level1	level2	level3	level4	NA	940	833	451	427	NA	0	0	0	0	NA	Cancer	14	12981.8	927.271	229.468	0	bmi.group	3	27.213	9.07099	2.24476	0.0811326	Cancer:bmi.group	42	121.912	2.90267	0.718313	0.912219	Residuals	2591	10470.1	4.04095	NA	NA	0	0.283964	0.912219
ACE2	smoking.group	Normal	708	179	never	light	heavy	NA	NA	61	25	93	NA	NA	0	0	0	NA	NA	Cancer	9	253.36	28.1511	14.5287	7.33e-17	smoking.group	2	2.86798	1.43399	0.740075	0.478767	Cancer:smoking.group	13	50.7162	3.90125	2.01342	0.0229507	Residuals	154	298.394	1.93763	NA	NA	7.9e-17	0.638356	0.0378012
ACE2	smoking.group	Tumor	10022	2402	never	light	heavy	NA	NA	778	431	1193	NA	NA	0	0	0	NA	NA	Cancer	9	5821.92	646.881	181.129	7.9e-262	smoking.group	2	0.404174	0.202087	0.0565851	0.944987	Cancer:smoking.group	18	122.398	6.79989	1.904	0.0120989	Residuals	2372	8471.3	3.57138	NA	NA	1.7e-261	0.968156	0.0241978
TMPRSS2	gender	Normal	708	708	FEMALE	MALE	NA	NA	NA	362	346	NA	NA	NA	0	0	NA	NA	NA	Cancer	22	2869.29	130.422	41.2056	1.11e-108	gender	1	3.43148	3.43148	1.08414	0.298151	Cancer:gender	17	111.618	6.56574	2.07438	0.00671343	Residuals	667	2111.16	3.16516	NA	NA	1.83e-108	0.491072	0.0156647
TMPRSS2	gender	Tumor	10022	10022	FEMALE	MALE	NA	NA	NA	5135	4887	NA	NA	NA	77	101	NA	NA	NA	Cancer	32	102404	3200.13	894.651	0	gender	1	2.54286	2.54286	0.7109	0.399166	Cancer:gender	26	162.316	6.24292	1.74532	0.0108302	Residuals	9784	34996.9	3.57696	NA	NA	0	0.620925	0.0233266
TMPRSS2	age.group	Normal	708	686	younger	older	NA	NA	NA	389	297	NA	NA	NA	0	0	NA	NA	NA	Cancer	22	2807.62	127.619	40.3644	1.1e-105	age.group	1	1.41463	1.41463	0.447431	0.503797	Cancer:age.group	18	107.49	5.97169	1.88877	0.0143484	Residuals	644	2036.12	3.16168	NA	NA	1.71e-105	0.641196	0.0251098
TMPRSS2	age.group	Tumor	10022	9710	younger	older	NA	NA	NA	6124	3586	NA	NA	NA	108	66	NA	NA	NA	Cancer	32	99085	3096.41	862.797	0	age.group	1	5.65654	5.65654	1.57616	0.209345	Cancer:age.group	32	287.769	8.99277	2.50579	5.51e-06	Residuals	9470	33986	3.5888	NA	NA	0	0.366354	2.57e-05
TMPRSS2	race	Normal	708	644	AA	ASIAN	WHITE	NA	NA	48	20	576	NA	NA	0	0	0	NA	NA	Cancer	22	2560.06	116.366	38.0667	1.73e-98	race	2	22.3755	11.1877	3.65983	0.0263151	Cancer:race	21	190.941	9.09244	2.9744	1.13e-05	Residuals	598	1828.03	3.0569	NA	NA	2.43e-98	0.10526	4.53e-05
TMPRSS2	race	Tumor	10022	8747	AA	ASIAN	WHITE	NA	NA	857	623	7267	NA	NA	13	1	145	NA	NA	Cancer	32	76550.5	2392.2	652.623	0	race	2	5.4425	2.72125	0.742391	0.476005	Cancer:race	61	705.272	11.5618	3.15421	2.64e-15	Residuals	8492	31127.6	3.66552	NA	NA	0	0.638356	1.85e-14
TMPRSS2	stage	Tumor	10730	7327	I	II	III	IV	Normal	1993	2142	1675	809	NA	7	3	4	8	NA	Cancer	27	45877	1699.15	445.552	0	stage	4	2602.52	650.631	170.609	8.28e-140	Cancer:stage	77	3637.14	47.2356	12.3862	1.34e-140	Residuals	7196	27442.5	3.81358	NA	NA	0	2.32e-138	3.76e-139
TMPRSS2	grade	Tumor	10730	4751	G1G2	G3G4	Normal	NA	NA	1871	2172	708	NA	NA	13	20	0	NA	NA	Cancer	24	32051.9	1335.5	301.898	0	grade	2	1403.24	701.619	158.606	2.27e-67	Cancer:grade	20	3066.9	153.345	34.6647	2.56e-124	Residuals	4671	20662.9	4.42366	NA	NA	0	3.18e-66	3.58e-123
TMPRSS2	menopause	Normal	708	108	NotPost	Post	NA	NA	NA	35	73	NA	NA	NA	0	0	NA	NA	NA	Cancer	2	177.03	88.5151	12.0172	2.06e-05	menopause	1	11.9423	11.9423	1.62134	0.205799	Cancer:menopause	2	21.3158	10.6579	1.44697	0.240071	Residuals	102	751.298	7.36567	NA	NA	2.14e-05	0.366354	0.280083
TMPRSS2	menopause	Tumor	10022	1785	NotPost	Post	NA	NA	NA	519	1266	NA	NA	NA	0	0	NA	NA	NA	Cancer	3	748.087	249.362	66.7135	7.07e-41	menopause	1	0.0840102	0.0840102	0.0224758	0.880845	Cancer:menopause	3	12.6418	4.21394	1.12738	0.336679	Residuals	1777	6642.09	3.73781	NA	NA	9e-41	0.948603	0.37708
TMPRSS2	bmi.group	Normal	708	133	level1	level2	level3	level4	NA	47	38	19	29	NA	0	0	0	0	NA	Cancer	8	829.601	103.7	42.9868	3.43e-29	bmi.group	3	24.3791	8.12638	3.36863	0.0215035	Cancer:bmi.group	20	83.9431	4.19716	1.73985	0.0386918	Residuals	101	243.649	2.41237	NA	NA	4.18e-29	0.10035	0.0601873
TMPRSS2	bmi.group	Tumor	10022	2651	level1	level2	level3	level4	NA	940	833	451	427	NA	0	0	0	0	NA	Cancer	14	15998.4	1142.74	254.479	0	bmi.group	3	27.3458	9.11527	2.02989	0.107608	Cancer:bmi.group	42	393.335	9.36511	2.08553	5.88e-05	Residuals	2591	11634.9	4.49052	NA	NA	0	0.305832	0.000205674
TMPRSS2	smoking.group	Normal	708	179	never	light	heavy	NA	NA	61	25	93	NA	NA	0	0	0	NA	NA	Cancer	9	378.577	42.0641	16.0606	2.3e-18	smoking.group	2	8.96494	4.48247	1.71146	0.184018	Cancer:smoking.group	13	97.4637	7.49721	2.86253	0.00101332	Residuals	154	403.339	2.61908	NA	NA	2.58e-18	0.366354	0.00283729
TMPRSS2	smoking.group	Tumor	10022	2402	never	light	heavy	NA	NA	778	431	1193	NA	NA	0	0	0	NA	NA	Cancer	9	8101.03	900.115	150.74	1.54e-225	smoking.group	2	4.49395	2.24697	0.376294	0.686441	Cancer:smoking.group	18	153.86	8.54776	1.43147	0.106484	Residuals	2372	14164	5.97132	NA	NA	3.08e-225	0.835668	0.141979

## Sheet: TableS5
Gene	Clinical.feature	Sample.type	Sample.total	Sample.total.wData	Group1	Group2	Group3	Group4	Group5	Group1.samples	Group2.samples	Group3.samples	Group4.samples	Group5.samples	Group1.isNA.samples	Group2.isNA.samples	Group3.isNA.samples	Group4.isNA.samples	Group5.isNA.samples	term	comparison	estimate	conf.low	conf.high	adj.p.value
ACE2	race	Normal	708	644	AA	ASIAN	WHITE	NA	NA	48	20	576	NA	NA	0	0	0	NA	NA	race	ASIAN-AA	-0.220076	-1.2114	0.771245	0.860812
ACE2	race	Normal	708	644	AA	ASIAN	WHITE	NA	NA	48	20	576	NA	NA	0	0	0	NA	NA	race	WHITE-AA	-0.421728	-0.9813	0.137844	0.180346
ACE2	race	Normal	708	644	AA	ASIAN	WHITE	NA	NA	48	20	576	NA	NA	0	0	0	NA	NA	race	WHITE-ASIAN	-0.201652	-1.04886	0.645561	0.841758
ACE2	race	Tumor	10022	8747	AA	ASIAN	WHITE	NA	NA	857	623	7267	NA	NA	0	0	0	NA	NA	race	ASIAN-AA	-0.186894	-0.416252	0.0424635	0.135837
ACE2	race	Tumor	10022	8747	AA	ASIAN	WHITE	NA	NA	857	623	7267	NA	NA	0	0	0	NA	NA	race	WHITE-AA	-0.11259	-0.269928	0.0447479	0.213923
ACE2	race	Tumor	10022	8747	AA	ASIAN	WHITE	NA	NA	857	623	7267	NA	NA	0	0	0	NA	NA	race	WHITE-ASIAN	0.074304	-0.107555	0.256163	0.603666
ACE2	stage	Tumor	10730	7327	I	II	III	IV	Normal	1993	2142	1675	809	NA	0	0	0	0	NA	stage	II-I	-0.116509	-0.286201	0.0531826	0.331858
ACE2	stage	Tumor	10730	7327	I	II	III	IV	Normal	1993	2142	1675	809	NA	0	0	0	0	NA	stage	III-I	-0.153817	-0.334551	0.0269177	0.137926
ACE2	stage	Tumor	10730	7327	I	II	III	IV	Normal	1993	2142	1675	809	NA	0	0	0	0	NA	stage	IV-I	-0.242835	-0.470132	-0.0155385	0.0293593
ACE2	stage	Tumor	10730	7327	I	II	III	IV	Normal	1993	2142	1675	809	NA	0	0	0	0	NA	stage	Normal-I	0.47045	0.2319	0.708999	7.61e-07
ACE2	stage	Tumor	10730	7327	I	II	III	IV	Normal	1993	2142	1675	809	NA	0	0	0	0	NA	stage	III-II	-0.0373072	-0.215148	0.140533	0.979088
ACE2	stage	Tumor	10730	7327	I	II	III	IV	Normal	1993	2142	1675	809	NA	0	0	0	0	NA	stage	IV-II	-0.126326	-0.351329	0.0986769	0.541643
ACE2	stage	Tumor	10730	7327	I	II	III	IV	Normal	1993	2142	1675	809	NA	0	0	0	0	NA	stage	Normal-II	0.586959	0.350594	0.823324	1.43e-10
ACE2	stage	Tumor	10730	7327	I	II	III	IV	Normal	1993	2142	1675	809	NA	0	0	0	0	NA	stage	IV-III	-0.0890186	-0.322462	0.144425	0.836548
ACE2	stage	Tumor	10730	7327	I	II	III	IV	Normal	1993	2142	1675	809	NA	0	0	0	0	NA	stage	Normal-III	0.624266	0.379853	0.86868	4.39e-11
ACE2	stage	Tumor	10730	7327	I	II	III	IV	Normal	1993	2142	1675	809	NA	0	0	0	0	NA	stage	Normal-IV	0.713285	0.432684	0.993886	5.3e-11
ACE2	grade	Tumor	10730	4751	G1G2	G3G4	Normal	NA	NA	1871	2172	708	NA	NA	0	0	0	NA	NA	grade	G3G4-G1G2	-0.278562	-0.422421	-0.134703	1.72e-05
ACE2	grade	Tumor	10730	4751	G1G2	G3G4	Normal	NA	NA	1871	2172	708	NA	NA	0	0	0	NA	NA	grade	Normal-G1G2	0.0355757	-0.165669	0.23682	0.909679
ACE2	grade	Tumor	10730	4751	G1G2	G3G4	Normal	NA	NA	1871	2172	708	NA	NA	0	0	0	NA	NA	grade	Normal-G3G4	0.314138	0.116758	0.511517	0.000564922
ACE2	bmi.group	Normal	708	133	level1	level2	level3	level4	NA	47	38	19	29	NA	0	0	0	0	NA	bmi.group	level2-level1	-0.256165	-1.13812	0.625788	0.872707
ACE2	bmi.group	Normal	708	133	level1	level2	level3	level4	NA	47	38	19	29	NA	0	0	0	0	NA	bmi.group	level3-level1	0.692859	-0.406204	1.79192	0.35736
ACE2	bmi.group	Normal	708	133	level1	level2	level3	level4	NA	47	38	19	29	NA	0	0	0	0	NA	bmi.group	level4-level1	-0.0775014	-1.03213	0.877129	0.996608
ACE2	bmi.group	Normal	708	133	level1	level2	level3	level4	NA	47	38	19	29	NA	0	0	0	0	NA	bmi.group	level3-level2	0.949024	-0.18689	2.08494	0.135112
ACE2	bmi.group	Normal	708	133	level1	level2	level3	level4	NA	47	38	19	29	NA	0	0	0	0	NA	bmi.group	level4-level2	0.178663	-0.818171	1.1755	0.965847
ACE2	bmi.group	Normal	708	133	level1	level2	level3	level4	NA	47	38	19	29	NA	0	0	0	0	NA	bmi.group	level4-level3	-0.77036	-1.96358	0.422862	0.336109
ACE2	bmi.group	Tumor	10022	2651	level1	level2	level3	level4	NA	940	833	451	427	NA	0	0	0	0	NA	bmi.group	level2-level1	0.185435	-0.0604666	0.431336	0.212168
ACE2	bmi.group	Tumor	10022	2651	level1	level2	level3	level4	NA	940	833	451	427	NA	0	0	0	0	NA	bmi.group	level3-level1	0.117538	-0.178471	0.413547	0.737291
ACE2	bmi.group	Tumor	10022	2651	level1	level2	level3	level4	NA	940	833	451	427	NA	0	0	0	0	NA	bmi.group	level4-level1	0.257422	-0.0441555	0.559	0.125033
ACE2	bmi.group	Tumor	10022	2651	level1	level2	level3	level4	NA	940	833	451	427	NA	0	0	0	0	NA	bmi.group	level3-level2	-0.0678972	-0.370007	0.234213	0.938771
ACE2	bmi.group	Tumor	10022	2651	level1	level2	level3	level4	NA	940	833	451	427	NA	0	0	0	0	NA	bmi.group	level4-level2	0.0719875	-0.235581	0.379556	0.931551
ACE2	bmi.group	Tumor	10022	2651	level1	level2	level3	level4	NA	940	833	451	427	NA	0	0	0	0	NA	bmi.group	level4-level3	0.139885	-0.209045	0.488815	0.731499
ACE2	smoking.group	Normal	708	179	never	light	heavy	NA	NA	61	25	93	NA	NA	0	0	0	NA	NA	smoking.group	light-heavy	-0.270966	-1.01311	0.471178	0.663721
ACE2	smoking.group	Normal	708	179	never	light	heavy	NA	NA	61	25	93	NA	NA	0	0	0	NA	NA	smoking.group	never-heavy	-0.18617	-0.728936	0.356596	0.696331
ACE2	smoking.group	Normal	708	179	never	light	heavy	NA	NA	61	25	93	NA	NA	0	0	0	NA	NA	smoking.group	never-light	0.0847965	-0.697503	0.867096	0.964383
ACE2	smoking.group	Tumor	10022	2402	never	light	heavy	NA	NA	778	431	1193	NA	NA	0	0	0	NA	NA	smoking.group	light-heavy	-0.0247237	-0.273797	0.22435	0.970569
ACE2	smoking.group	Tumor	10022	2402	never	light	heavy	NA	NA	778	431	1193	NA	NA	0	0	0	NA	NA	smoking.group	never-heavy	-0.021644	-0.225877	0.182589	0.966523
ACE2	smoking.group	Tumor	10022	2402	never	light	heavy	NA	NA	778	431	1193	NA	NA	0	0	0	NA	NA	smoking.group	never-light	0.00307964	-0.263041	0.2692	0.999594
TMPRSS2	race	Normal	708	644	AA	ASIAN	WHITE	NA	NA	48	20	576	NA	NA	0	0	0	NA	NA	race	ASIAN-AA	-0.874564	-1.96788	0.218753	0.145523
TMPRSS2	race	Normal	708	644	AA	ASIAN	WHITE	NA	NA	48	20	576	NA	NA	0	0	0	NA	NA	race	WHITE-AA	0.113042	-0.504104	0.730187	0.902978
TMPRSS2	race	Normal	708	644	AA	ASIAN	WHITE	NA	NA	48	20	576	NA	NA	0	0	0	NA	NA	race	WHITE-ASIAN	0.987606	0.0532243	1.92199	0.0354034
TMPRSS2	race	Tumor	10022	8747	AA	ASIAN	WHITE	NA	NA	857	623	7267	NA	NA	13	1	145	NA	NA	race	ASIAN-AA	-0.093096	-0.330259	0.144067	0.627536
TMPRSS2	race	Tumor	10022	8747	AA	ASIAN	WHITE	NA	NA	857	623	7267	NA	NA	13	1	145	NA	NA	race	WHITE-AA	-0.00365383	-0.167032	0.159724	0.998486
TMPRSS2	race	Tumor	10022	8747	AA	ASIAN	WHITE	NA	NA	857	623	7267	NA	NA	13	1	145	NA	NA	race	WHITE-ASIAN	0.0894422	-0.098201	0.277085	0.503349
TMPRSS2	stage	Tumor	10730	7327	I	II	III	IV	Normal	1993	2142	1675	809	NA	7	3	4	8	NA	stage	II-I	-0.0623138	-0.22835	0.103722	0.84438
TMPRSS2	stage	Tumor	10730	7327	I	II	III	IV	Normal	1993	2142	1675	809	NA	7	3	4	8	NA	stage	III-I	-0.0853411	-0.262217	0.0915352	0.680963
TMPRSS2	stage	Tumor	10730	7327	I	II	III	IV	Normal	1993	2142	1675	809	NA	7	3	4	8	NA	stage	IV-I	-0.10873	-0.331752	0.114292	0.672314
TMPRSS2	stage	Tumor	10730	7327	I	II	III	IV	Normal	1993	2142	1675	809	NA	7	3	4	8	NA	stage	Normal-I	1.81952	1.58629	2.05275	6.08e-12
TMPRSS2	stage	Tumor	10730	7327	I	II	III	IV	Normal	1993	2142	1675	809	NA	7	3	4	8	NA	stage	III-II	-0.0230273	-0.196989	0.150934	0.996371
TMPRSS2	stage	Tumor	10730	7327	I	II	III	IV	Normal	1993	2142	1675	809	NA	7	3	4	8	NA	stage	IV-II	-0.0464161	-0.267134	0.174301	0.978897
TMPRSS2	stage	Tumor	10730	7327	I	II	III	IV	Normal	1993	2142	1675	809	NA	7	3	4	8	NA	stage	Normal-II	1.88183	1.65081	2.11286	6.08e-12
TMPRSS2	stage	Tumor	10730	7327	I	II	III	IV	Normal	1993	2142	1675	809	NA	7	3	4	8	NA	stage	IV-III	-0.0233888	-0.252373	0.205595	0.998681
TMPRSS2	stage	Tumor	10730	7327	I	II	III	IV	Normal	1993	2142	1675	809	NA	7	3	4	8	NA	stage	Normal-III	1.90486	1.66593	2.14379	6.08e-12
TMPRSS2	stage	Tumor	10730	7327	I	II	III	IV	Normal	1993	2142	1675	809	NA	7	3	4	8	NA	stage	Normal-IV	1.92825	1.6534	2.2031	6.08e-12
TMPRSS2	grade	Tumor	10730	4751	G1G2	G3G4	Normal	NA	NA	1871	2172	708	NA	NA	13	20	0	NA	NA	grade	G3G4-G1G2	-0.244076	-0.400232	-0.0879192	0.000732853
TMPRSS2	grade	Tumor	10730	4751	G1G2	G3G4	Normal	NA	NA	1871	2172	708	NA	NA	13	20	0	NA	NA	grade	Normal-G1G2	0.796794	0.579013	1.01458	3.77e-08
TMPRSS2	grade	Tumor	10730	4751	G1G2	G3G4	Normal	NA	NA	1871	2172	708	NA	NA	13	20	0	NA	NA	grade	Normal-G3G4	1.04087	0.827233	1.25451	3.77e-08
TMPRSS2	bmi.group	Normal	708	133	level1	level2	level3	level4	NA	47	38	19	29	NA	0	0	0	0	NA	bmi.group	level2-level1	0.885195	4.35e-05	1.77035	0.0499838
TMPRSS2	bmi.group	Normal	708	133	level1	level2	level3	level4	NA	47	38	19	29	NA	0	0	0	0	NA	bmi.group	level3-level1	-0.256679	-1.35973	0.84637	0.929359
TMPRSS2	bmi.group	Normal	708	133	level1	level2	level3	level4	NA	47	38	19	29	NA	0	0	0	0	NA	bmi.group	level4-level1	0.414441	-0.543651	1.37253	0.671931
TMPRSS2	bmi.group	Normal	708	133	level1	level2	level3	level4	NA	47	38	19	29	NA	0	0	0	0	NA	bmi.group	level3-level2	-1.14187	-2.28191	-0.0018407	0.0494713
TMPRSS2	bmi.group	Normal	708	133	level1	level2	level3	level4	NA	47	38	19	29	NA	0	0	0	0	NA	bmi.group	level4-level2	-0.470753	-1.4712	0.529697	0.609859
TMPRSS2	bmi.group	Normal	708	133	level1	level2	level3	level4	NA	47	38	19	29	NA	0	0	0	0	NA	bmi.group	level4-level3	0.671121	-0.526429	1.86867	0.462999
TMPRSS2	bmi.group	Tumor	10022	2651	level1	level2	level3	level4	NA	940	833	451	427	NA	0	0	0	0	NA	bmi.group	level2-level1	0.217165	-0.0420547	0.476384	0.136705
TMPRSS2	bmi.group	Tumor	10022	2651	level1	level2	level3	level4	NA	940	833	451	427	NA	0	0	0	0	NA	bmi.group	level3-level1	0.142034	-0.170007	0.454075	0.645811
TMPRSS2	bmi.group	Tumor	10022	2651	level1	level2	level3	level4	NA	940	833	451	427	NA	0	0	0	0	NA	bmi.group	level4-level1	0.220335	-0.0975763	0.538247	0.282365
TMPRSS2	bmi.group	Tumor	10022	2651	level1	level2	level3	level4	NA	940	833	451	427	NA	0	0	0	0	NA	bmi.group	level3-level2	-0.0751308	-0.393603	0.243341	0.930056
TMPRSS2	bmi.group	Tumor	10022	2651	level1	level2	level3	level4	NA	940	833	451	427	NA	0	0	0	0	NA	bmi.group	level4-level2	0.00317036	-0.321056	0.327397	0.999994
TMPRSS2	bmi.group	Tumor	10022	2651	level1	level2	level3	level4	NA	940	833	451	427	NA	0	0	0	0	NA	bmi.group	level4-level3	0.0783011	-0.289527	0.446129	0.947311
TMPRSS2	smoking.group	Normal	708	179	never	light	heavy	NA	NA	61	25	93	NA	NA	0	0	0	NA	NA	smoking.group	light-heavy	-0.647757	-1.51059	0.215079	0.180841
TMPRSS2	smoking.group	Normal	708	179	never	light	heavy	NA	NA	61	25	93	NA	NA	0	0	0	NA	NA	smoking.group	never-heavy	-0.158124	-0.789158	0.47291	0.824071
TMPRSS2	smoking.group	Normal	708	179	never	light	heavy	NA	NA	61	25	93	NA	NA	0	0	0	NA	NA	smoking.group	never-light	0.489633	-0.419889	1.39915	0.411988
TMPRSS2	smoking.group	Tumor	10022	2402	never	light	heavy	NA	NA	778	431	1193	NA	NA	0	0	0	NA	NA	smoking.group	light-heavy	0.112906	-0.20916	0.434972	0.689309
TMPRSS2	smoking.group	Tumor	10022	2402	never	light	heavy	NA	NA	778	431	1193	NA	NA	0	0	0	NA	NA	smoking.group	never-heavy	0.0366729	-0.227412	0.300758	0.943216
TMPRSS2	smoking.group	Tumor	10022	2402	never	light	heavy	NA	NA	778	431	1193	NA	NA	0	0	0	NA	NA	smoking.group	never-light	-0.0762327	-0.420341	0.267876	0.861808

## Sheet: TableS6
ACE2 expression in TUMOR
Sample size		34 tumor types total	79	408	1084	304	36	447	48	161	152	500	65	530	288	145	510	371	512	501	86	264	177	178	495	159	259	367	103	374	134	502	119	530	56	80
Clinical	Groups	Individual tumor types with data available and at least 15 samples in sub-groups	ACC	BLCA	BRCA	CESC	CHOL	COAD	DLBC	ESCA	GBM	HNSC	KICH	KIRC	KIRP	LAML	LGG	LIHC	LUAD	LUSC	MESO	OV	PAAD	PCPG	PRAD	READ	SARC	SKCMmets	SKCMprimary	STAD	TGCT	THCA	THYM	UCEC	UCS	UVM
age	Younger / Older	31																	Younger < Older			Younger > Older
gender	Female / Male	27		Female > Male								Female > Male
race	African American / Asian / White	19
menopause	Not post / Post	3
BMI	Levels 1 / 2 / 3 / 4	14
smoking	Never / Light / Heavy	8
tumor stage	I / II / III / IV	21												I > IV
tumor grade	G1G2 / G3G4	12										G1G2 > G3G4		G1G2 > G3G4			G1G2 < G3G4	G1G2 > G3G4																G1G2> G3G4
ACE2 expression in NORMAL
Sample size		14 tumor types with number of normals >=15	0	19	113	3	9	41	0	9	0	44	24	72	32	0	0	50	59	49	0	0	4	3	52	10	2	1	0	30	0	58	2	22	0	0
Clinical	Groups	Individual tumor types with data available and at least 15 samples in sub-groups	ACC	BLCA	BRCA	CESC	CHOL	COAD	DLBC	ESCA	GBM	HNSC	KICH	KIRC	KIRP	LAML	LGG	LIHC	LUAD	LUSC	MESO	OV	PAAD	PCPG	PRAD	READ	SARC	SKCMmets	SKCMprimary	STAD	TGCT	THCA	THYM	UCEC	UCS	UVM
age	Younger / Older	8
gender	Female / Male	5
race	African American / Asian / White	0
menopause	Not post / Post	1
BMI	Levels 1 / 2 / 3 / 4	0
smoking	Never / Light / Heavy	0
tumor stage	I / II / III / IV	Not applicable
tumor grade	G1G2 / G3G4	Not applicable
TMPRSS2 expression in TUMOR
Sample size		33 tumor types total	79	408	1084	304	36	447	48	161	152	500	65	530	288	excluded	510	371	512	501	86	264	177	178	495	159	259	367	103	374	134	502	119	530	56	80
Clinical	Groups	Individual tumor types with data available and at least 15 samples in sub-groups	ACC	BLCA	BRCA	CESC	CHOL	COAD	DLBC	ESCA	GBM	HNSC	KICH	KIRC	KIRP	LAML	LGG	LIHC	LUAD	LUSC	MESO	OV	PAAD	PCPG	PRAD	READ	SARC	SKCMmets	SKCMprimary	STAD	TGCT	THCA	THYM	UCEC	UCS	UVM
age	Younger / Older	30								Younger < Older
gender	Female / Male	26																	Female > Male
race	African American / Asian / White	19
menopause	Not post / Post	3
BMI	Levels 1 / 2 / 3 / 4	14
smoking	Never / Light / Heavy	8
tumor stage	I / II / III / IV	21																														I > II, II < III
tumor grade	G1G2 / G3G4	12		G1G2 > G3G4		G1G2 > G3G4												G1G2 > G3G4												G1G2 > G3G4				G1G2 > G3G4
TMPRSS2 expression in NORMAL
Sample size		14 tumor types with number of normals >=15	0	19	113	3	9	41	0	9	0	44	24	72	32	excluded	0	50	59	49	0	0	4	3	52	10	2	1	0	30	0	58	2	22	0	0
Clinical	Groups	Individual tumor types with data available and at least 15 samples in sub-groups	ACC	BLCA	BRCA	CESC	CHOL	COAD	DLBC	ESCA	GBM	HNSC	KICH	KIRC	KIRP	LAML	LGG	LIHC	LUAD	LUSC	MESO	OV	PAAD	PCPG	PRAD	READ	SARC	SKCMmets	SKCMprimary	STAD	TGCT	THCA	THYM	UCEC	UCS	UVM
age	Younger / Older	8
gender	Female / Male	5
race	African American / Asian / White	0
menopause	Not post / Post	1
BMI	Levels 1 / 2 / 3 / 4	0
smoking	Never / Light / Heavy	0
tumor stage	I / II / III / IV	Not applicable
tumor grade	G1G2 / G3G4	Not applicable
Footnotes:
Only tumor types at FDR 0.05 shown, with > or < symbols indicating change of direction in gene expression. No additional fold change filter was applied.
Empty cells represent tests not reaching FDR 0.05 (not significant), or number of samples in each sub-group < 15 (not evaluable).
LAML samples do not express TMPRSS2, hence excluded from analysis.
Within individual tumor type, for testing of more than two groups, Tukey's HSD with fitted one-way ANOVA model was used. Otherwise, two-sided Welch's Two-Sample t-test was used. All p-values were corrected using BH-FDR method for multiple comparisons.

## Sheet: TableS7
Gene	Clinical.feature	Cancer	Sample.type	comparison	group1.mean	group2.mean	p.value	p.adj	log2FC	method
ACE2	gender	ACC	Normal	NA	NA	NA	NA	NA	NA	Welch Two Sample t-test
ACE2	gender	ACC	Tumor	FEMALE-MALE	6.81373	7.14858	0.688512	0.81842	-0.334858	Welch Two Sample t-test
ACE2	gender	BLCA	Normal	NA	NA	NA	NA	NA	NA	Welch Two Sample t-test
ACE2	gender	BLCA	Tumor	FEMALE-MALE	5.46485	4.70146	0.00168459	0.0432659	0.763394	Welch Two Sample t-test
ACE2	gender	BRCA	Normal	NA	NA	NA	NA	NA	NA	Welch Two Sample t-test
ACE2	gender	BRCA	Tumor	NA	NA	NA	NA	NA	NA	Welch Two Sample t-test
ACE2	gender	CESC	Normal	NA	NA	NA	NA	NA	NA	Welch Two Sample t-test
ACE2	gender	CESC	Tumor	NA	NA	NA	NA	NA	NA	Welch Two Sample t-test
ACE2	gender	CHOL	Normal	NA	NA	NA	NA	NA	NA	Welch Two Sample t-test
ACE2	gender	CHOL	Tumor	FEMALE-MALE	6.8667	6.83007	0.97103	0.97103	0.0366308	Welch Two Sample t-test
ACE2	gender	COAD	Normal	FEMALE-MALE	10.1926	9.15839	0.0039884	0.0628172	1.03422	Welch Two Sample t-test
ACE2	gender	COAD	Tumor	FEMALE-MALE	8.87865	8.76457	0.59232	0.786825	0.114079	Welch Two Sample t-test
ACE2	gender	DLBC	Normal	NA	NA	NA	NA	NA	NA	Welch Two Sample t-test
ACE2	gender	DLBC	Tumor	FEMALE-MALE	1.88657	1.9309	0.759463	0.839406	-0.0443309	Welch Two Sample t-test
ACE2	gender	ESCA	Normal	NA	NA	NA	NA	NA	NA	Welch Two Sample t-test
ACE2	gender	ESCA	Tumor	FEMALE-MALE	6.66837	6.04636	0.247999	0.581929	0.622007	Welch Two Sample t-test
ACE2	gender	GBM	Normal	NA	NA	NA	NA	NA	NA	Welch Two Sample t-test
ACE2	gender	GBM	Tumor	FEMALE-MALE	2.55804	2.5194	0.730057	0.821314	0.0386377	Welch Two Sample t-test
ACE2	gender	HNSC	Normal	NA	NA	NA	NA	NA	NA	Welch Two Sample t-test
ACE2	gender	HNSC	Tumor	FEMALE-MALE	6.66189	5.99289	1.05e-05	0.000661924	0.668996	Welch Two Sample t-test
ACE2	gender	KICH	Normal	NA	NA	NA	NA	NA	NA	Welch Two Sample t-test
ACE2	gender	KICH	Tumor	FEMALE-MALE	2.85217	2.96859	0.520237	0.776041	-0.116414	Welch Two Sample t-test
ACE2	gender	KIRC	Normal	FEMALE-MALE	9.49804	9.25778	0.702464	0.819541	0.240255	Welch Two Sample t-test
ACE2	gender	KIRC	Tumor	FEMALE-MALE	9.87059	9.29905	0.0229599	0.284817	0.571544	Welch Two Sample t-test
ACE2	gender	KIRP	Normal	NA	NA	NA	NA	NA	NA	Welch Two Sample t-test
ACE2	gender	KIRP	Tumor	FEMALE-MALE	10.0494	10.7867	0.0707432	0.405166	-0.737333	Welch Two Sample t-test
ACE2	gender	LAML	Normal	NA	NA	NA	NA	NA	NA	Welch Two Sample t-test
ACE2	gender	LAML	Tumor	FEMALE-MALE	1.77522	1.87564	0.333001	0.692114	-0.10042	Welch Two Sample t-test
ACE2	gender	LGG	Normal	NA	NA	NA	NA	NA	NA	Welch Two Sample t-test
ACE2	gender	LGG	Tumor	FEMALE-MALE	2.62006	2.68475	0.24413	0.581929	-0.0646932	Welch Two Sample t-test
ACE2	gender	LIHC	Normal	FEMALE-MALE	6.63952	7.11344	0.186352	0.581929	-0.473912	Welch Two Sample t-test
ACE2	gender	LIHC	Tumor	FEMALE-MALE	4.81618	5.31849	0.0908953	0.4772	-0.502309	Welch Two Sample t-test
ACE2	gender	LUAD	Normal	FEMALE-MALE	5.79118	5.92698	0.400693	0.718009	-0.135799	Welch Two Sample t-test
ACE2	gender	LUAD	Tumor	FEMALE-MALE	6.41223	6.30621	0.540749	0.776041	0.106017	Welch Two Sample t-test
ACE2	gender	LUSC	Normal	NA	NA	NA	NA	NA	NA	Welch Two Sample t-test
ACE2	gender	LUSC	Tumor	FEMALE-MALE	6.06084	5.90599	0.360958	0.692114	0.154855	Welch Two Sample t-test
ACE2	gender	MESO	Normal	NA	NA	NA	NA	NA	NA	Welch Two Sample t-test
ACE2	gender	MESO	Tumor	FEMALE-MALE	2.32971	2.64008	0.251355	0.581929	-0.310363	Welch Two Sample t-test
ACE2	gender	OV	Normal	NA	NA	NA	NA	NA	NA	Welch Two Sample t-test
ACE2	gender	OV	Tumor	NA	NA	NA	NA	NA	NA	Welch Two Sample t-test
ACE2	gender	PAAD	Normal	NA	NA	NA	NA	NA	NA	Welch Two Sample t-test
ACE2	gender	PAAD	Tumor	FEMALE-MALE	7.14378	7.3965	0.417833	0.718009	-0.252717	Welch Two Sample t-test
ACE2	gender	PCPG	Normal	NA	NA	NA	NA	NA	NA	Welch Two Sample t-test
ACE2	gender	PCPG	Tumor	FEMALE-MALE	2.87212	2.6211	0.0508205	0.355743	0.25102	Welch Two Sample t-test
ACE2	gender	PRAD	Normal	NA	NA	NA	NA	NA	NA	Welch Two Sample t-test
ACE2	gender	PRAD	Tumor	NA	NA	NA	NA	NA	NA	Welch Two Sample t-test
ACE2	gender	READ	Normal	NA	NA	NA	NA	NA	NA	Welch Two Sample t-test
ACE2	gender	READ	Tumor	FEMALE-MALE	9.23751	9.1214	0.723723	0.821314	0.116116	Welch Two Sample t-test
ACE2	gender	SARC	Normal	NA	NA	NA	NA	NA	NA	Welch Two Sample t-test
ACE2	gender	SARC	Tumor	FEMALE-MALE	2.67512	2.94101	0.17304	0.581929	-0.265887	Welch Two Sample t-test
ACE2	gender	SKCMmets	Normal	NA	NA	NA	NA	NA	NA	Welch Two Sample t-test
ACE2	gender	SKCMmets	Tumor	FEMALE-MALE	2.19558	2.15367	0.546055	0.776041	0.0419051	Welch Two Sample t-test
ACE2	gender	SKCMprimary	Normal	NA	NA	NA	NA	NA	NA	Welch Two Sample t-test
ACE2	gender	SKCMprimary	Tumor	FEMALE-MALE	2.60672	2.47895	0.456518	0.737452	0.127772	Welch Two Sample t-test
ACE2	gender	STAD	Normal	NA	NA	NA	NA	NA	NA	Welch Two Sample t-test
ACE2	gender	STAD	Tumor	FEMALE-MALE	6.70104	6.6476	0.8461	0.873841	0.0534424	Welch Two Sample t-test
ACE2	gender	TGCT	Normal	NA	NA	NA	NA	NA	NA	Welch Two Sample t-test
ACE2	gender	TGCT	Tumor	NA	NA	NA	NA	NA	NA	Welch Two Sample t-test
ACE2	gender	THCA	Normal	FEMALE-MALE	5.79821	5.47945	0.0497839	0.355743	0.318751	Welch Two Sample t-test
ACE2	gender	THCA	Tumor	FEMALE-MALE	5.39294	5.2709	0.148313	0.581929	0.122041	Welch Two Sample t-test
ACE2	gender	THYM	Normal	NA	NA	NA	NA	NA	NA	Welch Two Sample t-test
ACE2	gender	THYM	Tumor	FEMALE-MALE	4.31464	4.48812	0.566633	0.776041	-0.173482	Welch Two Sample t-test
ACE2	gender	UCEC	Normal	NA	NA	NA	NA	NA	NA	Welch Two Sample t-test
ACE2	gender	UCEC	Tumor	NA	NA	NA	NA	NA	NA	Welch Two Sample t-test
ACE2	gender	UCS	Normal	NA	NA	NA	NA	NA	NA	Welch Two Sample t-test
ACE2	gender	UCS	Tumor	NA	NA	NA	NA	NA	NA	Welch Two Sample t-test
ACE2	gender	UVM	Normal	NA	NA	NA	NA	NA	NA	Welch Two Sample t-test
ACE2	gender	UVM	Tumor	FEMALE-MALE	2.71414	2.39988	0.115751	0.560949	0.314256	Welch Two Sample t-test
TMPRSS2	gender	ACC	Normal	NA	NA	NA	NA	NA	NA	Welch Two Sample t-test
TMPRSS2	gender	ACC	Tumor	FEMALE-MALE	1.88929	1.66514	0.203222	0.581929	0.224145	Welch Two Sample t-test
TMPRSS2	gender	BLCA	Normal	NA	NA	NA	NA	NA	NA	Welch Two Sample t-test
TMPRSS2	gender	BLCA	Tumor	FEMALE-MALE	8.57696	9.14467	0.133933	0.562519	-0.567708	Welch Two Sample t-test
TMPRSS2	gender	BRCA	Normal	NA	NA	NA	NA	NA	NA	Welch Two Sample t-test
TMPRSS2	gender	BRCA	Tumor	NA	NA	NA	NA	NA	NA	Welch Two Sample t-test
TMPRSS2	gender	CESC	Normal	NA	NA	NA	NA	NA	NA	Welch Two Sample t-test
TMPRSS2	gender	CESC	Tumor	NA	NA	NA	NA	NA	NA	Welch Two Sample t-test
TMPRSS2	gender	CHOL	Normal	NA	NA	NA	NA	NA	NA	Welch Two Sample t-test
TMPRSS2	gender	CHOL	Tumor	FEMALE-MALE	9.73436	10.3345	0.390389	0.718009	-0.60012	Welch Two Sample t-test
TMPRSS2	gender	COAD	Normal	FEMALE-MALE	13.3495	13.1863	0.445328	0.737452	0.163271	Welch Two Sample t-test
TMPRSS2	gender	COAD	Tumor	FEMALE-MALE	11.8037	11.7746	0.67687	0.81842	0.0290881	Welch Two Sample t-test
TMPRSS2	gender	DLBC	Normal	NA	NA	NA	NA	NA	NA	Welch Two Sample t-test
TMPRSS2	gender	DLBC	Tumor	FEMALE-MALE	2.74727	2.52334	0.65217	0.81842	0.223933	Welch Two Sample t-test
TMPRSS2	gender	ESCA	Normal	NA	NA	NA	NA	NA	NA	Welch Two Sample t-test
TMPRSS2	gender	ESCA	Tumor	FEMALE-MALE	8.99957	8.8467	0.835415	0.873841	0.152875	Welch Two Sample t-test
TMPRSS2	gender	GBM	Normal	NA	NA	NA	NA	NA	NA	Welch Two Sample t-test
TMPRSS2	gender	GBM	Tumor	FEMALE-MALE	2.94315	3.05733	0.660266	0.81842	-0.114188	Welch Two Sample t-test
TMPRSS2	gender	HNSC	Normal	NA	NA	NA	NA	NA	NA	Welch Two Sample t-test
TMPRSS2	gender	HNSC	Tumor	FEMALE-MALE	5.68767	6.23562	0.0419774	0.355743	-0.547949	Welch Two Sample t-test
TMPRSS2	gender	KICH	Normal	NA	NA	NA	NA	NA	NA	Welch Two Sample t-test
TMPRSS2	gender	KICH	Tumor	FEMALE-MALE	12.7836	12.2994	0.193968	0.581929	0.484199	Welch Two Sample t-test
TMPRSS2	gender	KIRC	Normal	FEMALE-MALE	11.2747	11.1407	0.599486	0.786825	0.13394	Welch Two Sample t-test
TMPRSS2	gender	KIRC	Tumor	FEMALE-MALE	4.17641	4.36398	0.354153	0.692114	-0.187571	Welch Two Sample t-test
TMPRSS2	gender	KIRP	Normal	NA	NA	NA	NA	NA	NA	Welch Two Sample t-test
TMPRSS2	gender	KIRP	Tumor	FEMALE-MALE	5.73068	6.0055	0.359359	0.692114	-0.274824	Welch Two Sample t-test
TMPRSS2	gender	LAML	Normal	NA	NA	NA	NA	NA	NA	Welch Two Sample t-test
TMPRSS2	gender	LAML	Tumor	NA	NA	NA	NA	NA	NA	Welch Two Sample t-test
TMPRSS2	gender	LGG	Normal	NA	NA	NA	NA	NA	NA	Welch Two Sample t-test
TMPRSS2	gender	LGG	Tumor	FEMALE-MALE	3.14604	3.21636	0.475911	0.74956	-0.0703234	Welch Two Sample t-test
TMPRSS2	gender	LIHC	Normal	FEMALE-MALE	11.0493	10.8191	0.362536	0.692114	0.230164	Welch Two Sample t-test
TMPRSS2	gender	LIHC	Tumor	FEMALE-MALE	9.64318	9.43998	0.253505	0.581929	0.203202	Welch Two Sample t-test
TMPRSS2	gender	LUAD	Normal	FEMALE-MALE	11.7917	11.9325	0.258635	0.581929	-0.140882	Welch Two Sample t-test
TMPRSS2	gender	LUAD	Tumor	FEMALE-MALE	10.7973	10.3377	0.00206028	0.0432659	0.459637	Welch Two Sample t-test
TMPRSS2	gender	LUSC	Normal	NA	NA	NA	NA	NA	NA	Welch Two Sample t-test
TMPRSS2	gender	LUSC	Tumor	FEMALE-MALE	8.32089	7.86682	0.0271254	0.284817	0.454072	Welch Two Sample t-test
TMPRSS2	gender	MESO	Normal	NA	NA	NA	NA	NA	NA	Welch Two Sample t-test
TMPRSS2	gender	MESO	Tumor	FEMALE-MALE	2.88831	3.20438	0.558467	0.776041	-0.316065	Welch Two Sample t-test
TMPRSS2	gender	OV	Normal	NA	NA	NA	NA	NA	NA	Welch Two Sample t-test
TMPRSS2	gender	OV	Tumor	NA	NA	NA	NA	NA	NA	Welch Two Sample t-test
TMPRSS2	gender	PAAD	Normal	NA	NA	NA	NA	NA	NA	Welch Two Sample t-test
TMPRSS2	gender	PAAD	Tumor	FEMALE-MALE	10.2973	10.5954	0.197309	0.581929	-0.29815	Welch Two Sample t-test
TMPRSS2	gender	PCPG	Normal	NA	NA	NA	NA	NA	NA	Welch Two Sample t-test
TMPRSS2	gender	PCPG	Tumor	FEMALE-MALE	1.7923	1.83579	0.663171	0.81842	-0.0434924	Welch Two Sample t-test
TMPRSS2	gender	PRAD	Normal	NA	NA	NA	NA	NA	NA	Welch Two Sample t-test
TMPRSS2	gender	PRAD	Tumor	NA	NA	NA	NA	NA	NA	Welch Two Sample t-test
TMPRSS2	gender	READ	Normal	NA	NA	NA	NA	NA	NA	Welch Two Sample t-test
TMPRSS2	gender	READ	Tumor	FEMALE-MALE	11.743	11.7053	0.772946	0.839579	0.0377361	Welch Two Sample t-test
TMPRSS2	gender	SARC	Normal	NA	NA	NA	NA	NA	NA	Welch Two Sample t-test
TMPRSS2	gender	SARC	Tumor	FEMALE-MALE	2.47145	2.73473	0.132076	0.562519	-0.263279	Welch Two Sample t-test
TMPRSS2	gender	SKCMmets	Normal	NA	NA	NA	NA	NA	NA	Welch Two Sample t-test
TMPRSS2	gender	SKCMmets	Tumor	FEMALE-MALE	4.02184	3.81531	0.239039	0.581929	0.206534	Welch Two Sample t-test
TMPRSS2	gender	SKCMprimary	Normal	NA	NA	NA	NA	NA	NA	Welch Two Sample t-test
TMPRSS2	gender	SKCMprimary	Tumor	FEMALE-MALE	3.70824	3.88398	0.529577	0.776041	-0.175741	Welch Two Sample t-test
TMPRSS2	gender	STAD	Normal	NA	NA	NA	NA	NA	NA	Welch Two Sample t-test
TMPRSS2	gender	STAD	Tumor	FEMALE-MALE	10.9355	11.1515	0.232003	0.581929	-0.215974	Welch Two Sample t-test
TMPRSS2	gender	TGCT	Normal	NA	NA	NA	NA	NA	NA	Welch Two Sample t-test
TMPRSS2	gender	TGCT	Tumor	NA	NA	NA	NA	NA	NA	Welch Two Sample t-test
TMPRSS2	gender	THCA	Normal	FEMALE-MALE	8.8167	8.83112	0.944598	0.959833	-0.0144282	Welch Two Sample t-test
TMPRSS2	gender	THCA	Tumor	FEMALE-MALE	8.43612	8.72722	0.0704043	0.405166	-0.291104	Welch Two Sample t-test
TMPRSS2	gender	THYM	Normal	NA	NA	NA	NA	NA	NA	Welch Two Sample t-test
TMPRSS2	gender	THYM	Tumor	FEMALE-MALE	4.01539	3.78288	0.421688	0.718009	0.232513	Welch Two Sample t-test
TMPRSS2	gender	UCEC	Normal	NA	NA	NA	NA	NA	NA	Welch Two Sample t-test
TMPRSS2	gender	UCEC	Tumor	NA	NA	NA	NA	NA	NA	Welch Two Sample t-test
TMPRSS2	gender	UCS	Normal	NA	NA	NA	NA	NA	NA	Welch Two Sample t-test
TMPRSS2	gender	UCS	Tumor	NA	NA	NA	NA	NA	NA	Welch Two Sample t-test
TMPRSS2	gender	UVM	Normal	NA	NA	NA	NA	NA	NA	Welch Two Sample t-test
TMPRSS2	gender	UVM	Tumor	FEMALE-MALE	2.29326	2.34277	0.802464	0.856868	-0.0495049	Welch Two Sample t-test
ACE2	age.group	ACC	Normal	NA	NA	NA	NA	NA	NA	Welch Two Sample t-test
ACE2	age.group	ACC	Tumor	NA	NA	NA	NA	NA	NA	Welch Two Sample t-test
ACE2	age.group	BLCA	Normal	NA	NA	NA	NA	NA	NA	Welch Two Sample t-test
ACE2	age.group	BLCA	Tumor	younger-older	5.02152	4.85043	0.424948	0.658707	0.171086	Welch Two Sample t-test
ACE2	age.group	BRCA	Normal	younger-older	4.78363	4.71363	0.666108	0.841681	0.0700021	Welch Two Sample t-test
ACE2	age.group	BRCA	Tumor	younger-older	3.28111	3.00497	0.0346548	0.266842	0.276137	Welch Two Sample t-test
ACE2	age.group	CESC	Normal	NA	NA	NA	NA	NA	NA	Welch Two Sample t-test
ACE2	age.group	CESC	Tumor	younger-older	5.91591	6.00515	0.772916	0.880026	-0.0892471	Welch Two Sample t-test
ACE2	age.group	CHOL	Normal	NA	NA	NA	NA	NA	NA	Welch Two Sample t-test
ACE2	age.group	CHOL	Tumor	younger-older	6.70837	6.97752	0.794737	0.880026	-0.269154	Welch Two Sample t-test
ACE2	age.group	COAD	Normal	NA	NA	NA	NA	NA	NA	Welch Two Sample t-test
ACE2	age.group	COAD	Tumor	younger-older	8.99461	8.67735	0.158097	0.524952	0.317267	Welch Two Sample t-test
ACE2	age.group	DLBC	Normal	NA	NA	NA	NA	NA	NA	Welch Two Sample t-test
ACE2	age.group	DLBC	Tumor	younger-older	1.98951	1.72514	0.0164093	0.210586	0.264367	Welch Two Sample t-test
ACE2	age.group	ESCA	Normal	NA	NA	NA	NA	NA	NA	Welch Two Sample t-test
ACE2	age.group	ESCA	Tumor	younger-older	6.01474	6.36262	0.331926	0.603862	-0.347873	Welch Two Sample t-test
ACE2	age.group	GBM	Normal	NA	NA	NA	NA	NA	NA	Welch Two Sample t-test
ACE2	age.group	GBM	Tumor	younger-older	2.59958	2.42576	0.124344	0.479792	0.173816	Welch Two Sample t-test
ACE2	age.group	HNSC	Normal	younger-older	6.12818	7.08085	0.00554671	0.106774	-0.952675	Welch Two Sample t-test
ACE2	age.group	HNSC	Tumor	younger-older	6.11747	6.23647	0.435276	0.658707	-0.118999	Welch Two Sample t-test
ACE2	age.group	KICH	Normal	NA	NA	NA	NA	NA	NA	Welch Two Sample t-test
ACE2	age.group	KICH	Tumor	NA	NA	NA	NA	NA	NA	Welch Two Sample t-test
ACE2	age.group	KIRC	Normal	younger-older	9.4124	9.02703	0.509356	0.726304	0.385374	Welch Two Sample t-test
ACE2	age.group	KIRC	Tumor	younger-older	9.52258	9.51309	0.971204	0.98386	0.00949652	Welch Two Sample t-test
ACE2	age.group	KIRP	Normal	younger-older	10.047	9.42013	0.443473	0.658707	0.62682	Welch Two Sample t-test
ACE2	age.group	KIRP	Tumor	younger-older	10.5661	10.6492	0.792362	0.880026	-0.0831056	Welch Two Sample t-test
ACE2	age.group	LAML	Normal	NA	NA	NA	NA	NA	NA	Welch Two Sample t-test
ACE2	age.group	LAML	Tumor	younger-older	1.77362	1.99472	0.233764	0.580639	-0.2211	Welch Two Sample t-test
ACE2	age.group	LGG	Normal	NA	NA	NA	NA	NA	NA	Welch Two Sample t-test
ACE2	age.group	LGG	Tumor	younger-older	2.63816	2.9528	0.0157138	0.210586	-0.314641	Welch Two Sample t-test
ACE2	age.group	LIHC	Normal	younger-older	6.99037	6.87285	0.774971	0.880026	0.117522	Welch Two Sample t-test
ACE2	age.group	LIHC	Tumor	younger-older	5.01592	5.44963	0.165069	0.524952	-0.433709	Welch Two Sample t-test
ACE2	age.group	LUAD	Normal	younger-older	5.91457	5.75808	0.345064	0.603862	0.156484	Welch Two Sample t-test
ACE2	age.group	LUAD	Tumor	younger-older	6.06896	6.6164	0.00193559	0.04968	-0.547444	Welch Two Sample t-test
ACE2	age.group	LUSC	Normal	younger-older	5.83326	5.99063	0.562177	0.759432	-0.157368	Welch Two Sample t-test
ACE2	age.group	LUSC	Tumor	younger-older	5.83391	6.00822	0.278525	0.603862	-0.174304	Welch Two Sample t-test
ACE2	age.group	MESO	Normal	NA	NA	NA	NA	NA	NA	Welch Two Sample t-test
ACE2	age.group	MESO	Tumor	younger-older	2.40192	2.75876	0.138068	0.506249	-0.356839	Welch Two Sample t-test
ACE2	age.group	OV	Normal	NA	NA	NA	NA	NA	NA	Welch Two Sample t-test
ACE2	age.group	OV	Tumor	younger-older	4.23065	3.55823	0.00012534	0.0048256	0.672426	Welch Two Sample t-test
ACE2	age.group	PAAD	Normal	NA	NA	NA	NA	NA	NA	Welch Two Sample t-test
ACE2	age.group	PAAD	Tumor	younger-older	7.1903	7.32569	0.672248	0.841681	-0.135389	Welch Two Sample t-test
ACE2	age.group	PCPG	Normal	NA	NA	NA	NA	NA	NA	Welch Two Sample t-test
ACE2	age.group	PCPG	Tumor	younger-older	2.70841	3.20628	0.0256892	0.250181	-0.497868	Welch Two Sample t-test
ACE2	age.group	PRAD	Normal	younger-older	4.56336	4.43331	0.79624	0.880026	0.130053	Welch Two Sample t-test
ACE2	age.group	PRAD	Tumor	younger-older	3.30342	3.46474	0.0937255	0.41992	-0.161321	Welch Two Sample t-test
ACE2	age.group	READ	Normal	NA	NA	NA	NA	NA	NA	Welch Two Sample t-test
ACE2	age.group	READ	Tumor	younger-older	8.95678	9.33105	0.272559	0.603862	-0.374273	Welch Two Sample t-test
ACE2	age.group	SARC	Normal	NA	NA	NA	NA	NA	NA	Welch Two Sample t-test
ACE2	age.group	SARC	Tumor	younger-older	2.89597	2.65132	0.184074	0.524952	0.244645	Welch Two Sample t-test
ACE2	age.group	SKCMmets	Normal	NA	NA	NA	NA	NA	NA	Welch Two Sample t-test
ACE2	age.group	SKCMmets	Tumor	younger-older	2.17083	2.1724	0.98386	0.98386	-0.00156512	Welch Two Sample t-test
ACE2	age.group	SKCMprimary	Normal	NA	NA	NA	NA	NA	NA	Welch Two Sample t-test
ACE2	age.group	SKCMprimary	Tumor	younger-older	2.72632	2.35706	0.0288312	0.250181	0.369259	Welch Two Sample t-test
ACE2	age.group	STAD	Normal	NA	NA	NA	NA	NA	NA	Welch Two Sample t-test
ACE2	age.group	STAD	Tumor	younger-older	6.71046	6.5929	0.667304	0.841681	0.117559	Welch Two Sample t-test
ACE2	age.group	TGCT	Normal	NA	NA	NA	NA	NA	NA	Welch Two Sample t-test
ACE2	age.group	TGCT	Tumor	NA	NA	NA	NA	NA	NA	Welch Two Sample t-test
ACE2	age.group	THCA	Normal	NA	NA	NA	NA	NA	NA	Welch Two Sample t-test
ACE2	age.group	THCA	Tumor	younger-older	5.36561	5.2993	0.547403	0.759432	0.0663107	Welch Two Sample t-test
ACE2	age.group	THYM	Normal	NA	NA	NA	NA	NA	NA	Welch Two Sample t-test
ACE2	age.group	THYM	Tumor	younger-older	4.5269	4.19319	0.295958	0.603862	0.333702	Welch Two Sample t-test
ACE2	age.group	UCEC	Normal	NA	NA	NA	NA	NA	NA	Welch Two Sample t-test
ACE2	age.group	UCEC	Tumor	younger-older	4.91562	4.73675	0.173786	0.524952	0.178879	Welch Two Sample t-test
ACE2	age.group	UCS	Normal	NA	NA	NA	NA	NA	NA	Welch Two Sample t-test
ACE2	age.group	UCS	Tumor	younger-older	3.73384	3.6892	0.932181	0.969972	0.0446303	Welch Two Sample t-test
ACE2	age.group	UVM	Normal	NA	NA	NA	NA	NA	NA	Welch Two Sample t-test
ACE2	age.group	UVM	Tumor	younger-older	2.648	2.40538	0.231235	0.580639	0.242623	Welch Two Sample t-test
TMPRSS2	age.group	ACC	Normal	NA	NA	NA	NA	NA	NA	Welch Two Sample t-test
TMPRSS2	age.group	ACC	Tumor	NA	NA	NA	NA	NA	NA	Welch Two Sample t-test
TMPRSS2	age.group	BLCA	Normal	NA	NA	NA	NA	NA	NA	Welch Two Sample t-test
TMPRSS2	age.group	BLCA	Tumor	younger-older	8.86745	9.02993	0.643154	0.841681	-0.162475	Welch Two Sample t-test
TMPRSS2	age.group	BRCA	Normal	younger-older	8.90686	8.32206	0.336918	0.603862	0.584802	Welch Two Sample t-test
TMPRSS2	age.group	BRCA	Tumor	younger-older	7.77564	7.4932	0.029242	0.250181	0.282434	Welch Two Sample t-test
TMPRSS2	age.group	CESC	Normal	NA	NA	NA	NA	NA	NA	Welch Two Sample t-test
TMPRSS2	age.group	CESC	Tumor	younger-older	8.04749	7.99899	0.919558	0.969945	0.0484992	Welch Two Sample t-test
TMPRSS2	age.group	CHOL	Normal	NA	NA	NA	NA	NA	NA	Welch Two Sample t-test
TMPRSS2	age.group	CHOL	Tumor	younger-older	10.33	9.70678	0.38935	0.629134	0.623239	Welch Two Sample t-test
TMPRSS2	age.group	COAD	Normal	NA	NA	NA	NA	NA	NA	Welch Two Sample t-test
TMPRSS2	age.group	COAD	Tumor	younger-older	11.737	11.806	0.362767	0.617024	-0.0689477	Welch Two Sample t-test
TMPRSS2	age.group	DLBC	Normal	NA	NA	NA	NA	NA	NA	Welch Two Sample t-test
TMPRSS2	age.group	DLBC	Tumor	younger-older	2.77283	2.36261	0.368612	0.617024	0.410222	Welch Two Sample t-test
TMPRSS2	age.group	ESCA	Normal	NA	NA	NA	NA	NA	NA	Welch Two Sample t-test
TMPRSS2	age.group	ESCA	Tumor	younger-older	8.06046	10.0969	8.95e-05	0.0048256	-2.0364	Welch Two Sample t-test
TMPRSS2	age.group	GBM	Normal	NA	NA	NA	NA	NA	NA	Welch Two Sample t-test
TMPRSS2	age.group	GBM	Tumor	younger-older	2.8912	3.24148	0.195735	0.53358	-0.350285	Welch Two Sample t-test
TMPRSS2	age.group	HNSC	Normal	younger-older	9.12458	10.2075	0.0914575	0.41992	-1.08292	Welch Two Sample t-test
TMPRSS2	age.group	HNSC	Tumor	younger-older	6.22943	5.98364	0.339347	0.603862	0.245792	Welch Two Sample t-test
TMPRSS2	age.group	KICH	Normal	NA	NA	NA	NA	NA	NA	Welch Two Sample t-test
TMPRSS2	age.group	KICH	Tumor	NA	NA	NA	NA	NA	NA	Welch Two Sample t-test
TMPRSS2	age.group	KIRC	Normal	younger-older	11.1078	11.3056	0.464804	0.675281	-0.197833	Welch Two Sample t-test
TMPRSS2	age.group	KIRC	Tumor	younger-older	4.29944	4.21304	0.677717	0.841681	0.0863957	Welch Two Sample t-test
TMPRSS2	age.group	KIRP	Normal	younger-older	11.2588	11.3749	0.562127	0.759432	-0.116143	Welch Two Sample t-test
TMPRSS2	age.group	KIRP	Tumor	younger-older	5.91517	5.99463	0.746661	0.880026	-0.079457	Welch Two Sample t-test
TMPRSS2	age.group	LAML	Normal	NA	NA	NA	NA	NA	NA	Welch Two Sample t-test
TMPRSS2	age.group	LAML	Tumor	NA	NA	NA	NA	NA	NA	Welch Two Sample t-test
TMPRSS2	age.group	LGG	Normal	NA	NA	NA	NA	NA	NA	Welch Two Sample t-test
TMPRSS2	age.group	LGG	Tumor	younger-older	3.19952	2.83965	0.0472469	0.298771	0.359868	Welch Two Sample t-test
TMPRSS2	age.group	LIHC	Normal	younger-older	10.9101	10.9639	0.82691	0.884335	-0.0538017	Welch Two Sample t-test
TMPRSS2	age.group	LIHC	Tumor	younger-older	9.49018	9.52622	0.823924	0.884335	-0.0360471	Welch Two Sample t-test
TMPRSS2	age.group	LUAD	Normal	younger-older	11.933	11.7838	0.255777	0.596813	0.14915	Welch Two Sample t-test
TMPRSS2	age.group	LUAD	Tumor	younger-older	10.4019	10.7094	0.0504418	0.298771	-0.307514	Welch Two Sample t-test
TMPRSS2	age.group	LUSC	Normal	younger-older	11.559	11.8485	0.124621	0.479792	-0.289472	Welch Two Sample t-test
TMPRSS2	age.group	LUSC	Tumor	younger-older	7.86442	8.0946	0.250214	0.596813	-0.230175	Welch Two Sample t-test
TMPRSS2	age.group	MESO	Normal	NA	NA	NA	NA	NA	NA	Welch Two Sample t-test
TMPRSS2	age.group	MESO	Tumor	younger-older	2.82376	3.36182	0.200959	0.53358	-0.538059	Welch Two Sample t-test
TMPRSS2	age.group	OV	Normal	NA	NA	NA	NA	NA	NA	Welch Two Sample t-test
TMPRSS2	age.group	OV	Tumor	younger-older	5.21979	5.47817	0.330866	0.603862	-0.258372	Welch Two Sample t-test
TMPRSS2	age.group	PAAD	Normal	NA	NA	NA	NA	NA	NA	Welch Two Sample t-test
TMPRSS2	age.group	PAAD	Tumor	younger-older	10.2171	10.6964	0.0406246	0.284372	-0.479288	Welch Two Sample t-test
TMPRSS2	age.group	PCPG	Normal	NA	NA	NA	NA	NA	NA	Welch Two Sample t-test
TMPRSS2	age.group	PCPG	Tumor	younger-older	1.82296	1.73003	0.298061	0.603862	0.0929316	Welch Two Sample t-test
TMPRSS2	age.group	PRAD	Normal	younger-older	14.0117	14.0261	0.970798	0.98386	-0.0143601	Welch Two Sample t-test
TMPRSS2	age.group	PRAD	Tumor	younger-older	14.6723	14.7128	0.717206	0.876586	-0.0404829	Welch Two Sample t-test
TMPRSS2	age.group	READ	Normal	NA	NA	NA	NA	NA	NA	Welch Two Sample t-test
TMPRSS2	age.group	READ	Tumor	younger-older	11.6385	11.82	0.179058	0.524952	-0.181423	Welch Two Sample t-test
TMPRSS2	age.group	SARC	Normal	NA	NA	NA	NA	NA	NA	Welch Two Sample t-test
TMPRSS2	age.group	SARC	Tumor	younger-older	2.54513	2.69748	0.392187	0.629134	-0.152351	Welch Two Sample t-test
TMPRSS2	age.group	SKCMmets	Normal	NA	NA	NA	NA	NA	NA	Welch Two Sample t-test
TMPRSS2	age.group	SKCMmets	Tumor	younger-older	3.88167	3.92984	0.800024	0.880026	-0.0481753	Welch Two Sample t-test
TMPRSS2	age.group	SKCMprimary	Normal	NA	NA	NA	NA	NA	NA	Welch Two Sample t-test
TMPRSS2	age.group	SKCMprimary	Tumor	younger-older	4.0527	3.5712	0.0981632	0.41992	0.481501	Welch Two Sample t-test
TMPRSS2	age.group	STAD	Normal	NA	NA	NA	NA	NA	NA	Welch Two Sample t-test
TMPRSS2	age.group	STAD	Tumor	younger-older	10.8997	11.1915	0.0895624	0.41992	-0.291772	Welch Two Sample t-test
TMPRSS2	age.group	TGCT	Normal	NA	NA	NA	NA	NA	NA	Welch Two Sample t-test
TMPRSS2	age.group	TGCT	Tumor	NA	NA	NA	NA	NA	NA	Welch Two Sample t-test
TMPRSS2	age.group	THCA	Normal	NA	NA	NA	NA	NA	NA	Welch Two Sample t-test
TMPRSS2	age.group	THCA	Tumor	younger-older	8.56285	8.21388	0.0569602	0.313281	0.348966	Welch Two Sample t-test
TMPRSS2	age.group	THYM	Normal	NA	NA	NA	NA	NA	NA	Welch Two Sample t-test
TMPRSS2	age.group	THYM	Tumor	younger-older	3.97327	3.72503	0.444841	0.658707	0.248239	Welch Two Sample t-test
TMPRSS2	age.group	UCEC	Normal	NA	NA	NA	NA	NA	NA	Welch Two Sample t-test
TMPRSS2	age.group	UCEC	Tumor	younger-older	8.94811	8.79142	0.327654	0.603862	0.156687	Welch Two Sample t-test
TMPRSS2	age.group	UCS	Normal	NA	NA	NA	NA	NA	NA	Welch Two Sample t-test
TMPRSS2	age.group	UCS	Tumor	younger-older	5.41473	6.20509	0.31628	0.603862	-0.790355	Welch Two Sample t-test
TMPRSS2	age.group	UVM	Normal	NA	NA	NA	NA	NA	NA	Welch Two Sample t-test
TMPRSS2	age.group	UVM	Tumor	younger-older	2.18554	2.51267	0.172773	0.524952	-0.327123	Welch Two Sample t-test
ACE2	race	ACC	Normal	NA	NA	NA	NA	NA	NA	Tukey HSD test with ANOVA fit
ACE2	race	ACC	Tumor	NA	NA	NA	NA	NA	NA	Tukey HSD test with ANOVA fit
ACE2	race	BLCA	Normal	NA	NA	NA	NA	NA	NA	Tukey HSD test with ANOVA fit
ACE2	race	BLCA	Tumor	ASIAN-WHITE	4.89286	4.89436	0.999988	0.999988	-0.00150133	Tukey HSD test with ANOVA fit
ACE2	race	BLCA	Tumor	AA-WHITE	5.18992	4.89436	0.78027	0.999988	0.295555	Tukey HSD test with ANOVA fit
ACE2	race	BLCA	Tumor	AA-ASIAN	5.18992	4.89286	0.838311	0.999988	0.297056	Tukey HSD test with ANOVA fit
ACE2	race	BRCA	Normal	NA	NA	NA	NA	NA	NA	Tukey HSD test with ANOVA fit
ACE2	race	BRCA	Tumor	ASIAN-WHITE	3.75199	3.12235	0.0422827	0.317186	0.629642	Tukey HSD test with ANOVA fit
ACE2	race	BRCA	Tumor	AA-WHITE	3.57378	3.12235	0.0149887	0.179865	0.451437	Tukey HSD test with ANOVA fit
ACE2	race	BRCA	Tumor	AA-ASIAN	3.57378	3.75199	0.81211	0.999988	-0.178205	Tukey HSD test with ANOVA fit
ACE2	race	CESC	Normal	NA	NA	NA	NA	NA	NA	Tukey HSD test with ANOVA fit
ACE2	race	CESC	Tumor	ASIAN-WHITE	5.92973	5.94575	0.999132	0.999988	-0.0160132	Tukey HSD test with ANOVA fit
ACE2	race	CESC	Tumor	AA-WHITE	6.31599	5.94575	0.515036	0.999988	0.370245	Tukey HSD test with ANOVA fit
ACE2	race	CESC	Tumor	AA-ASIAN	6.31599	5.92973	0.718082	0.999988	0.386258	Tukey HSD test with ANOVA fit
ACE2	race	CHOL	Normal	NA	NA	NA	NA	NA	NA	Tukey HSD test with ANOVA fit
ACE2	race	CHOL	Tumor	NA	NA	NA	NA	NA	NA	Tukey HSD test with ANOVA fit
ACE2	race	COAD	Normal	NA	NA	NA	NA	NA	NA	Tukey HSD test with ANOVA fit
ACE2	race	COAD	Tumor	NA	NA	NA	NA	NA	NA	Tukey HSD test with ANOVA fit
ACE2	race	DLBC	Normal	NA	NA	NA	NA	NA	NA	Tukey HSD test with ANOVA fit
ACE2	race	DLBC	Tumor	NA	NA	NA	NA	NA	NA	Tukey HSD test with ANOVA fit
ACE2	race	ESCA	Normal	NA	NA	NA	NA	NA	NA	Tukey HSD test with ANOVA fit
ACE2	race	ESCA	Tumor	NA	NA	NA	NA	NA	NA	Tukey HSD test with ANOVA fit
ACE2	race	GBM	Normal	NA	NA	NA	NA	NA	NA	Tukey HSD test with ANOVA fit
ACE2	race	GBM	Tumor	NA	NA	NA	NA	NA	NA	Tukey HSD test with ANOVA fit
ACE2	race	HNSC	Normal	NA	NA	NA	NA	NA	NA	Tukey HSD test with ANOVA fit
ACE2	race	HNSC	Tumor	NA	NA	NA	NA	NA	NA	Tukey HSD test with ANOVA fit
ACE2	race	KICH	Normal	NA	NA	NA	NA	NA	NA	Tukey HSD test with ANOVA fit
ACE2	race	KICH	Tumor	NA	NA	NA	NA	NA	NA	Tukey HSD test with ANOVA fit
ACE2	race	KIRC	Normal	NA	NA	NA	NA	NA	NA	Tukey HSD test with ANOVA fit
ACE2	race	KIRC	Tumor	NA	NA	NA	NA	NA	NA	Tukey HSD test with ANOVA fit
ACE2	race	KIRP	Normal	NA	NA	NA	NA	NA	NA	Tukey HSD test with ANOVA fit
ACE2	race	KIRP	Tumor	NA	NA	NA	NA	NA	NA	Tukey HSD test with ANOVA fit
ACE2	race	LAML	Normal	NA	NA	NA	NA	NA	NA	Tukey HSD test with ANOVA fit
ACE2	race	LAML	Tumor	NA	NA	NA	NA	NA	NA	Tukey HSD test with ANOVA fit
ACE2	race	LGG	Normal	NA	NA	NA	NA	NA	NA	Tukey HSD test with ANOVA fit
ACE2	race	LGG	Tumor	NA	NA	NA	NA	NA	NA	Tukey HSD test with ANOVA fit
ACE2	race	LIHC	Normal	NA	NA	NA	NA	NA	NA	Tukey HSD test with ANOVA fit
ACE2	race	LIHC	Tumor	ASIAN-WHITE	4.81487	5.38662	0.145405	0.614806	-0.571747	Tukey HSD test with ANOVA fit
ACE2	race	LIHC	Tumor	AA-WHITE	6.14067	5.38662	0.538361	0.999988	0.754052	Tukey HSD test with ANOVA fit
ACE2	race	LIHC	Tumor	AA-ASIAN	6.14067	4.81487	0.153701	0.614806	1.3258	Tukey HSD test with ANOVA fit
ACE2	race	LUAD	Normal	NA	NA	NA	NA	NA	NA	Tukey HSD test with ANOVA fit
ACE2	race	LUAD	Tumor	NA	NA	NA	NA	NA	NA	Tukey HSD test with ANOVA fit
ACE2	race	LUSC	Normal	NA	NA	NA	NA	NA	NA	Tukey HSD test with ANOVA fit
ACE2	race	LUSC	Tumor	NA	NA	NA	NA	NA	NA	Tukey HSD test with ANOVA fit
ACE2	race	MESO	Normal	NA	NA	NA	NA	NA	NA	Tukey HSD test with ANOVA fit
ACE2	race	MESO	Tumor	NA	NA	NA	NA	NA	NA	Tukey HSD test with ANOVA fit
ACE2	race	OV	Normal	NA	NA	NA	NA	NA	NA	Tukey HSD test with ANOVA fit
ACE2	race	OV	Tumor	NA	NA	NA	NA	NA	NA	Tukey HSD test with ANOVA fit
ACE2	race	PAAD	Normal	NA	NA	NA	NA	NA	NA	Tukey HSD test with ANOVA fit
ACE2	race	PAAD	Tumor	NA	NA	NA	NA	NA	NA	Tukey HSD test with ANOVA fit
ACE2	race	PCPG	Normal	NA	NA	NA	NA	NA	NA	Tukey HSD test with ANOVA fit
ACE2	race	PCPG	Tumor	NA	NA	NA	NA	NA	NA	Tukey HSD test with ANOVA fit
ACE2	race	PRAD	Normal	NA	NA	NA	NA	NA	NA	Tukey HSD test with ANOVA fit
ACE2	race	PRAD	Tumor	NA	NA	NA	NA	NA	NA	Tukey HSD test with ANOVA fit
ACE2	race	READ	Normal	NA	NA	NA	NA	NA	NA	Tukey HSD test with ANOVA fit
ACE2	race	READ	Tumor	NA	NA	NA	NA	NA	NA	Tukey HSD test with ANOVA fit
ACE2	race	SARC	Normal	NA	NA	NA	NA	NA	NA	Tukey HSD test with ANOVA fit
ACE2	race	SARC	Tumor	NA	NA	NA	NA	NA	NA	Tukey HSD test with ANOVA fit
ACE2	race	SKCMmets	Normal	NA	NA	NA	NA	NA	NA	Tukey HSD test with ANOVA fit
ACE2	race	SKCMmets	Tumor	NA	NA	NA	NA	NA	NA	Tukey HSD test with ANOVA fit
ACE2	race	SKCMprimary	Normal	NA	NA	NA	NA	NA	NA	Tukey HSD test with ANOVA fit
ACE2	race	SKCMprimary	Tumor	NA	NA	NA	NA	NA	NA	Tukey HSD test with ANOVA fit
ACE2	race	STAD	Normal	NA	NA	NA	NA	NA	NA	Tukey HSD test with ANOVA fit
ACE2	race	STAD	Tumor	NA	NA	NA	NA	NA	NA	Tukey HSD test with ANOVA fit
ACE2	race	TGCT	Normal	NA	NA	NA	NA	NA	NA	Tukey HSD test with ANOVA fit
ACE2	race	TGCT	Tumor	NA	NA	NA	NA	NA	NA	Tukey HSD test with ANOVA fit
ACE2	race	THCA	Normal	NA	NA	NA	NA	NA	NA	Tukey HSD test with ANOVA fit
ACE2	race	THCA	Tumor	ASIAN-WHITE	5.34225	5.35103	0.996846	0.999988	-0.00878024	Tukey HSD test with ANOVA fit
ACE2	race	THCA	Tumor	AA-WHITE	5.40056	5.35103	0.94484	0.999988	0.0495257	Tukey HSD test with ANOVA fit
ACE2	race	THCA	Tumor	AA-ASIAN	5.40056	5.34225	0.945916	0.999988	0.058306	Tukey HSD test with ANOVA fit
ACE2	race	THYM	Normal	NA	NA	NA	NA	NA	NA	Tukey HSD test with ANOVA fit
ACE2	race	THYM	Tumor	NA	NA	NA	NA	NA	NA	Tukey HSD test with ANOVA fit
ACE2	race	UCEC	Normal	NA	NA	NA	NA	NA	NA	Tukey HSD test with ANOVA fit
ACE2	race	UCEC	Tumor	ASIAN-WHITE	4.63942	4.87089	0.77072	0.999988	-0.231473	Tukey HSD test with ANOVA fit
ACE2	race	UCEC	Tumor	AA-WHITE	4.65026	4.87089	0.363966	0.999988	-0.220632	Tukey HSD test with ANOVA fit
ACE2	race	UCEC	Tumor	AA-ASIAN	4.65026	4.63942	0.999493	0.999988	0.0108404	Tukey HSD test with ANOVA fit
ACE2	race	UCS	Normal	NA	NA	NA	NA	NA	NA	Tukey HSD test with ANOVA fit
ACE2	race	UCS	Tumor	NA	NA	NA	NA	NA	NA	Tukey HSD test with ANOVA fit
ACE2	race	UVM	Normal	NA	NA	NA	NA	NA	NA	Tukey HSD test with ANOVA fit
ACE2	race	UVM	Tumor	NA	NA	NA	NA	NA	NA	Tukey HSD test with ANOVA fit
TMPRSS2	race	ACC	Normal	NA	NA	NA	NA	NA	NA	Tukey HSD test with ANOVA fit
TMPRSS2	race	ACC	Tumor	NA	NA	NA	NA	NA	NA	Tukey HSD test with ANOVA fit
TMPRSS2	race	BLCA	Normal	NA	NA	NA	NA	NA	NA	Tukey HSD test with ANOVA fit
TMPRSS2	race	BLCA	Tumor	ASIAN-WHITE	10.4896	8.88924	0.00780344	0.179865	1.60033	Tukey HSD test with ANOVA fit
TMPRSS2	race	BLCA	Tumor	AA-WHITE	8.09868	8.88924	0.51009	0.999988	-0.790556	Tukey HSD test with ANOVA fit
TMPRSS2	race	BLCA	Tumor	AA-ASIAN	8.09868	10.4896	0.0144313	0.179865	-2.39089	Tukey HSD test with ANOVA fit
TMPRSS2	race	BRCA	Normal	NA	NA	NA	NA	NA	NA	Tukey HSD test with ANOVA fit
TMPRSS2	race	BRCA	Tumor	ASIAN-WHITE	8.01227	7.64996	0.293351	0.960056	0.362311	Tukey HSD test with ANOVA fit
TMPRSS2	race	BRCA	Tumor	AA-WHITE	7.96522	7.64996	0.0910506	0.546303	0.315264	Tukey HSD test with ANOVA fit
TMPRSS2	race	BRCA	Tumor	AA-ASIAN	7.96522	8.01227	0.98329	0.999988	-0.0470475	Tukey HSD test with ANOVA fit
TMPRSS2	race	CESC	Normal	NA	NA	NA	NA	NA	NA	Tukey HSD test with ANOVA fit
TMPRSS2	race	CESC	Tumor	ASIAN-WHITE	7.95221	8.19315	0.906368	0.999988	-0.240945	Tukey HSD test with ANOVA fit
TMPRSS2	race	CESC	Tumor	AA-WHITE	7.4532	8.19315	0.267086	0.960056	-0.739952	Tukey HSD test with ANOVA fit
TMPRSS2	race	CESC	Tumor	AA-ASIAN	7.4532	7.95221	0.758183	0.999988	-0.499007	Tukey HSD test with ANOVA fit
TMPRSS2	race	CHOL	Normal	NA	NA	NA	NA	NA	NA	Tukey HSD test with ANOVA fit
TMPRSS2	race	CHOL	Tumor	NA	NA	NA	NA	NA	NA	Tukey HSD test with ANOVA fit
TMPRSS2	race	COAD	Normal	NA	NA	NA	NA	NA	NA	Tukey HSD test with ANOVA fit
TMPRSS2	race	COAD	Tumor	NA	NA	NA	NA	NA	NA	Tukey HSD test with ANOVA fit
TMPRSS2	race	DLBC	Normal	NA	NA	NA	NA	NA	NA	Tukey HSD test with ANOVA fit
TMPRSS2	race	DLBC	Tumor	NA	NA	NA	NA	NA	NA	Tukey HSD test with ANOVA fit
TMPRSS2	race	ESCA	Normal	NA	NA	NA	NA	NA	NA	Tukey HSD test with ANOVA fit
TMPRSS2	race	ESCA	Tumor	NA	NA	NA	NA	NA	NA	Tukey HSD test with ANOVA fit
TMPRSS2	race	GBM	Normal	NA	NA	NA	NA	NA	NA	Tukey HSD test with ANOVA fit
TMPRSS2	race	GBM	Tumor	NA	NA	NA	NA	NA	NA	Tukey HSD test with ANOVA fit
TMPRSS2	race	HNSC	Normal	NA	NA	NA	NA	NA	NA	Tukey HSD test with ANOVA fit
TMPRSS2	race	HNSC	Tumor	NA	NA	NA	NA	NA	NA	Tukey HSD test with ANOVA fit
TMPRSS2	race	KICH	Normal	NA	NA	NA	NA	NA	NA	Tukey HSD test with ANOVA fit
TMPRSS2	race	KICH	Tumor	NA	NA	NA	NA	NA	NA	Tukey HSD test with ANOVA fit
TMPRSS2	race	KIRC	Normal	NA	NA	NA	NA	NA	NA	Tukey HSD test with ANOVA fit
TMPRSS2	race	KIRC	Tumor	NA	NA	NA	NA	NA	NA	Tukey HSD test with ANOVA fit
TMPRSS2	race	KIRP	Normal	NA	NA	NA	NA	NA	NA	Tukey HSD test with ANOVA fit
TMPRSS2	race	KIRP	Tumor	NA	NA	NA	NA	NA	NA	Tukey HSD test with ANOVA fit
TMPRSS2	race	LAML	Normal	NA	NA	NA	NA	NA	NA	Tukey HSD test with ANOVA fit
TMPRSS2	race	LAML	Tumor	NA	NA	NA	NA	NA	NA	Tukey HSD test with ANOVA fit
TMPRSS2	race	LGG	Normal	NA	NA	NA	NA	NA	NA	Tukey HSD test with ANOVA fit
TMPRSS2	race	LGG	Tumor	NA	NA	NA	NA	NA	NA	Tukey HSD test with ANOVA fit
TMPRSS2	race	LIHC	Normal	NA	NA	NA	NA	NA	NA	Tukey HSD test with ANOVA fit
TMPRSS2	race	LIHC	Tumor	ASIAN-WHITE	9.29824	9.68978	0.0440536	0.317186	-0.391541	Tukey HSD test with ANOVA fit
TMPRSS2	race	LIHC	Tumor	AA-WHITE	9.48341	9.68978	0.850584	0.999988	-0.206369	Tukey HSD test with ANOVA fit
TMPRSS2	race	LIHC	Tumor	AA-ASIAN	9.48341	9.29824	0.879383	0.999988	0.185172	Tukey HSD test with ANOVA fit
TMPRSS2	race	LUAD	Normal	NA	NA	NA	NA	NA	NA	Tukey HSD test with ANOVA fit
TMPRSS2	race	LUAD	Tumor	NA	NA	NA	NA	NA	NA	Tukey HSD test with ANOVA fit
TMPRSS2	race	LUSC	Normal	NA	NA	NA	NA	NA	NA	Tukey HSD test with ANOVA fit
TMPRSS2	race	LUSC	Tumor	NA	NA	NA	NA	NA	NA	Tukey HSD test with ANOVA fit
TMPRSS2	race	MESO	Normal	NA	NA	NA	NA	NA	NA	Tukey HSD test with ANOVA fit
TMPRSS2	race	MESO	Tumor	NA	NA	NA	NA	NA	NA	Tukey HSD test with ANOVA fit
TMPRSS2	race	OV	Normal	NA	NA	NA	NA	NA	NA	Tukey HSD test with ANOVA fit
TMPRSS2	race	OV	Tumor	NA	NA	NA	NA	NA	NA	Tukey HSD test with ANOVA fit
TMPRSS2	race	PAAD	Normal	NA	NA	NA	NA	NA	NA	Tukey HSD test with ANOVA fit
TMPRSS2	race	PAAD	Tumor	NA	NA	NA	NA	NA	NA	Tukey HSD test with ANOVA fit
TMPRSS2	race	PCPG	Normal	NA	NA	NA	NA	NA	NA	Tukey HSD test with ANOVA fit
TMPRSS2	race	PCPG	Tumor	NA	NA	NA	NA	NA	NA	Tukey HSD test with ANOVA fit
TMPRSS2	race	PRAD	Normal	NA	NA	NA	NA	NA	NA	Tukey HSD test with ANOVA fit
TMPRSS2	race	PRAD	Tumor	NA	NA	NA	NA	NA	NA	Tukey HSD test with ANOVA fit
TMPRSS2	race	READ	Normal	NA	NA	NA	NA	NA	NA	Tukey HSD test with ANOVA fit
TMPRSS2	race	READ	Tumor	NA	NA	NA	NA	NA	NA	Tukey HSD test with ANOVA fit
TMPRSS2	race	SARC	Normal	NA	NA	NA	NA	NA	NA	Tukey HSD test with ANOVA fit
TMPRSS2	race	SARC	Tumor	NA	NA	NA	NA	NA	NA	Tukey HSD test with ANOVA fit
TMPRSS2	race	SKCMmets	Normal	NA	NA	NA	NA	NA	NA	Tukey HSD test with ANOVA fit
TMPRSS2	race	SKCMmets	Tumor	NA	NA	NA	NA	NA	NA	Tukey HSD test with ANOVA fit
TMPRSS2	race	SKCMprimary	Normal	NA	NA	NA	NA	NA	NA	Tukey HSD test with ANOVA fit
TMPRSS2	race	SKCMprimary	Tumor	NA	NA	NA	NA	NA	NA	Tukey HSD test with ANOVA fit
TMPRSS2	race	STAD	Normal	NA	NA	NA	NA	NA	NA	Tukey HSD test with ANOVA fit
TMPRSS2	race	STAD	Tumor	NA	NA	NA	NA	NA	NA	Tukey HSD test with ANOVA fit
TMPRSS2	race	TGCT	Normal	NA	NA	NA	NA	NA	NA	Tukey HSD test with ANOVA fit
TMPRSS2	race	TGCT	Tumor	NA	NA	NA	NA	NA	NA	Tukey HSD test with ANOVA fit
TMPRSS2	race	THCA	Normal	NA	NA	NA	NA	NA	NA	Tukey HSD test with ANOVA fit
TMPRSS2	race	THCA	Tumor	ASIAN-WHITE	8.64271	8.63305	0.999054	0.999988	0.00966682	Tukey HSD test with ANOVA fit
TMPRSS2	race	THCA	Tumor	AA-WHITE	8.48186	8.63305	0.877487	0.999988	-0.151189	Tukey HSD test with ANOVA fit
TMPRSS2	race	THCA	Tumor	AA-ASIAN	8.48186	8.64271	0.900672	0.999988	-0.160855	Tukey HSD test with ANOVA fit
TMPRSS2	race	THYM	Normal	NA	NA	NA	NA	NA	NA	Tukey HSD test with ANOVA fit
TMPRSS2	race	THYM	Tumor	NA	NA	NA	NA	NA	NA	Tukey HSD test with ANOVA fit
TMPRSS2	race	UCEC	Normal	NA	NA	NA	NA	NA	NA	Tukey HSD test with ANOVA fit
TMPRSS2	race	UCEC	Tumor	ASIAN-WHITE	8.82733	9.0269	0.867065	0.999988	-0.199561	Tukey HSD test with ANOVA fit
TMPRSS2	race	UCEC	Tumor	AA-WHITE	8.64928	9.0269	0.114651	0.589632	-0.377615	Tukey HSD test with ANOVA fit
TMPRSS2	race	UCEC	Tumor	AA-ASIAN	8.64928	8.82733	0.904197	0.999988	-0.178054	Tukey HSD test with ANOVA fit
TMPRSS2	race	UCS	Normal	NA	NA	NA	NA	NA	NA	Tukey HSD test with ANOVA fit
TMPRSS2	race	UCS	Tumor	NA	NA	NA	NA	NA	NA	Tukey HSD test with ANOVA fit
TMPRSS2	race	UVM	Normal	NA	NA	NA	NA	NA	NA	Tukey HSD test with ANOVA fit
TMPRSS2	race	UVM	Tumor	NA	NA	NA	NA	NA	NA	Tukey HSD test with ANOVA fit
ACE2	stage	ACC	Tumor	NA	NA	NA	NA	NA	NA	Tukey HSD test with ANOVA fit
ACE2	stage	BLCA	Tumor	NA	NA	NA	NA	NA	NA	Tukey HSD test with ANOVA fit
ACE2	stage	BRCA	Tumor	III-IV	3.00268	3.07067	0.998763	0.999999	-0.0679877	Tukey HSD test with ANOVA fit
ACE2	stage	BRCA	Tumor	II-IV	3.33977	3.07067	0.927877	0.999999	0.269097	Tukey HSD test with ANOVA fit
ACE2	stage	BRCA	Tumor	I-IV	3.00497	3.07067	0.998929	0.999999	-0.0656961	Tukey HSD test with ANOVA fit
ACE2	stage	BRCA	Tumor	II-III	3.33977	3.00268	0.0947758	0.999999	0.337084	Tukey HSD test with ANOVA fit
ACE2	stage	BRCA	Tumor	I-III	3.00497	3.00268	0.999999	0.999999	0.00229162	Tukey HSD test with ANOVA fit
ACE2	stage	BRCA	Tumor	I-II	3.00497	3.33977	0.173573	0.999999	-0.334793	Tukey HSD test with ANOVA fit
ACE2	stage	CESC	Tumor	NA	NA	NA	NA	NA	NA	Tukey HSD test with ANOVA fit
ACE2	stage	CHOL	Tumor	NA	NA	NA	NA	NA	NA	Tukey HSD test with ANOVA fit
ACE2	stage	COAD	Tumor	III-IV	8.76924	8.9197	0.97238	0.999999	-0.150458	Tukey HSD test with ANOVA fit
ACE2	stage	COAD	Tumor	II-IV	8.69643	8.9197	0.904674	0.999999	-0.223266	Tukey HSD test with ANOVA fit
ACE2	stage	COAD	Tumor	I-IV	9.0288	8.9197	0.991939	0.999999	0.109099	Tukey HSD test with ANOVA fit
ACE2	stage	COAD	Tumor	II-III	8.69643	8.76924	0.992526	0.999999	-0.0728078	Tukey HSD test with ANOVA fit
ACE2	stage	COAD	Tumor	I-III	9.0288	8.76924	0.858673	0.999999	0.259557	Tukey HSD test with ANOVA fit
ACE2	stage	COAD	Tumor	I-II	9.0288	8.69643	0.706447	0.999999	0.332364	Tukey HSD test with ANOVA fit
ACE2	stage	DLBC	Tumor	NA	NA	NA	NA	NA	NA	Tukey HSD test with ANOVA fit
ACE2	stage	ESCA	Tumor	NA	NA	NA	NA	NA	NA	Tukey HSD test with ANOVA fit
ACE2	stage	GBM	Tumor	NA	NA	NA	NA	NA	NA	Tukey HSD test with ANOVA fit
ACE2	stage	HNSC	Tumor	III-IV	6.23006	6.14875	0.979395	0.999999	0.0813088	Tukey HSD test with ANOVA fit
ACE2	stage	HNSC	Tumor	II-IV	6.2637	6.14875	0.951089	0.999999	0.114949	Tukey HSD test with ANOVA fit
ACE2	stage	HNSC	Tumor	I-IV	6.42415	6.14875	0.844597	0.999999	0.275406	Tukey HSD test with ANOVA fit
ACE2	stage	HNSC	Tumor	II-III	6.2637	6.23006	0.999258	0.999999	0.0336403	Tukey HSD test with ANOVA fit
ACE2	stage	HNSC	Tumor	I-III	6.42415	6.23006	0.95248	0.999999	0.194097	Tukey HSD test with ANOVA fit
ACE2	stage	HNSC	Tumor	I-II	6.42415	6.2637	0.973329	0.999999	0.160456	Tukey HSD test with ANOVA fit
ACE2	stage	KICH	Tumor	NA	NA	NA	NA	NA	NA	Tukey HSD test with ANOVA fit
ACE2	stage	KIRC	Tumor	III-IV	9.2746	8.54849	0.256604	0.999999	0.726112	Tukey HSD test with ANOVA fit
ACE2	stage	KIRC	Tumor	II-IV	9.31435	8.54849	0.377876	0.999999	0.765863	Tukey HSD test with ANOVA fit
ACE2	stage	KIRC	Tumor	I-IV	9.93614	8.54849	0.000487607	0.02457	1.38765	Tukey HSD test with ANOVA fit
ACE2	stage	KIRC	Tumor	II-III	9.31435	9.2746	0.999743	0.999999	0.0397504	Tukey HSD test with ANOVA fit
ACE2	stage	KIRC	Tumor	I-III	9.93614	9.2746	0.127788	0.999999	0.66154	Tukey HSD test with ANOVA fit
ACE2	stage	KIRC	Tumor	I-II	9.93614	9.31435	0.416071	0.999999	0.62179	Tukey HSD test with ANOVA fit
ACE2	stage	KIRP	Tumor	III-IV	10.3282	9.28636	0.466372	0.999999	1.0418	Tukey HSD test with ANOVA fit
ACE2	stage	KIRP	Tumor	II-IV	10.9253	9.28636	0.194918	0.999999	1.63891	Tukey HSD test with ANOVA fit
ACE2	stage	KIRP	Tumor	I-IV	10.8082	9.28636	0.0964103	0.999999	1.52189	Tukey HSD test with ANOVA fit
ACE2	stage	KIRP	Tumor	II-III	10.9253	10.3282	0.780734	0.999999	0.597106	Tukey HSD test with ANOVA fit
ACE2	stage	KIRP	Tumor	I-III	10.8082	10.3282	0.605055	0.999999	0.480089	Tukey HSD test with ANOVA fit
ACE2	stage	KIRP	Tumor	I-II	10.8082	10.9253	0.996826	0.999999	-0.117018	Tukey HSD test with ANOVA fit
ACE2	stage	LAML	Tumor	NA	NA	NA	NA	NA	NA	Tukey HSD test with ANOVA fit
ACE2	stage	LGG	Tumor	NA	NA	NA	NA	NA	NA	Tukey HSD test with ANOVA fit
ACE2	stage	LIHC	Tumor	NA	NA	NA	NA	NA	NA	Tukey HSD test with ANOVA fit
ACE2	stage	LUAD	Tumor	III-IV	6.46047	6.57364	0.993781	0.999999	-0.113164	Tukey HSD test with ANOVA fit
ACE2	stage	LUAD	Tumor	II-IV	6.27122	6.57364	0.887679	0.999999	-0.302419	Tukey HSD test with ANOVA fit
ACE2	stage	LUAD	Tumor	I-IV	6.36358	6.57364	0.951945	0.999999	-0.210059	Tukey HSD test with ANOVA fit
ACE2	stage	LUAD	Tumor	II-III	6.27122	6.46047	0.901213	0.999999	-0.189254	Tukey HSD test with ANOVA fit
ACE2	stage	LUAD	Tumor	I-III	6.36358	6.46047	0.978062	0.999999	-0.0968947	Tukey HSD test with ANOVA fit
ACE2	stage	LUAD	Tumor	I-II	6.36358	6.27122	0.971983	0.999999	0.0923597	Tukey HSD test with ANOVA fit
ACE2	stage	LUSC	Tumor	NA	NA	NA	NA	NA	NA	Tukey HSD test with ANOVA fit
ACE2	stage	MESO	Tumor	NA	NA	NA	NA	NA	NA	Tukey HSD test with ANOVA fit
ACE2	stage	OV	Tumor	NA	NA	NA	NA	NA	NA	Tukey HSD test with ANOVA fit
ACE2	stage	PAAD	Tumor	NA	NA	NA	NA	NA	NA	Tukey HSD test with ANOVA fit
ACE2	stage	PCPG	Tumor	NA	NA	NA	NA	NA	NA	Tukey HSD test with ANOVA fit
ACE2	stage	PRAD	Tumor	NA	NA	NA	NA	NA	NA	Tukey HSD test with ANOVA fit
ACE2	stage	READ	Tumor	III-IV	9.24621	9.41113	0.99036	0.999999	-0.164921	Tukey HSD test with ANOVA fit
ACE2	stage	READ	Tumor	II-IV	8.96684	9.41113	0.848682	0.999999	-0.44429	Tukey HSD test with ANOVA fit
ACE2	stage	READ	Tumor	I-IV	9.20502	9.41113	0.986192	0.999999	-0.206113	Tukey HSD test with ANOVA fit
ACE2	stage	READ	Tumor	II-III	8.96684	9.24621	0.91473	0.999999	-0.279369	Tukey HSD test with ANOVA fit
ACE2	stage	READ	Tumor	I-III	9.20502	9.24621	0.999796	0.999999	-0.0411919	Tukey HSD test with ANOVA fit
ACE2	stage	READ	Tumor	I-II	9.20502	8.96684	0.964082	0.999999	0.238178	Tukey HSD test with ANOVA fit
ACE2	stage	SARC	Tumor	NA	NA	NA	NA	NA	NA	Tukey HSD test with ANOVA fit
ACE2	stage	SKCMmets	Tumor	III-IV	2.16656	2.31586	0.747902	0.999999	-0.149301	Tukey HSD test with ANOVA fit
ACE2	stage	SKCMmets	Tumor	II-IV	2.18351	2.31586	0.834317	0.999999	-0.132354	Tukey HSD test with ANOVA fit
ACE2	stage	SKCMmets	Tumor	I-IV	2.06561	2.31586	0.384566	0.999999	-0.250257	Tukey HSD test with ANOVA fit
ACE2	stage	SKCMmets	Tumor	II-III	2.18351	2.16656	0.997573	0.999999	0.0169471	Tukey HSD test with ANOVA fit
ACE2	stage	SKCMmets	Tumor	I-III	2.06561	2.16656	0.671024	0.999999	-0.100956	Tukey HSD test with ANOVA fit
ACE2	stage	SKCMmets	Tumor	I-II	2.06561	2.18351	0.658844	0.999999	-0.117903	Tukey HSD test with ANOVA fit
ACE2	stage	SKCMprimary	Tumor	NA	NA	NA	NA	NA	NA	Tukey HSD test with ANOVA fit
ACE2	stage	STAD	Tumor	III-IV	6.83487	6.89852	0.999081	0.999999	-0.063647	Tukey HSD test with ANOVA fit
ACE2	stage	STAD	Tumor	II-IV	6.55275	6.89852	0.889473	0.999999	-0.345773	Tukey HSD test with ANOVA fit
ACE2	stage	STAD	Tumor	I-IV	6.33077	6.89852	0.72615	0.999999	-0.567754	Tukey HSD test with ANOVA fit
ACE2	stage	STAD	Tumor	II-III	6.55275	6.83487	0.814857	0.999999	-0.282126	Tukey HSD test with ANOVA fit
ACE2	stage	STAD	Tumor	I-III	6.33077	6.83487	0.611763	0.999999	-0.504107	Tukey HSD test with ANOVA fit
ACE2	stage	STAD	Tumor	I-II	6.33077	6.55275	0.95516	0.999999	-0.221981	Tukey HSD test with ANOVA fit
ACE2	stage	TGCT	Tumor	NA	NA	NA	NA	NA	NA	Tukey HSD test with ANOVA fit
ACE2	stage	THCA	Tumor	III-IV	5.42673	5.15022	0.152376	0.999999	0.276518	Tukey HSD test with ANOVA fit
ACE2	stage	THCA	Tumor	II-IV	5.39027	5.15022	0.404495	0.999999	0.240049	Tukey HSD test with ANOVA fit
ACE2	stage	THCA	Tumor	I-IV	5.36669	5.15022	0.255095	0.999999	0.216475	Tukey HSD test with ANOVA fit
ACE2	stage	THCA	Tumor	II-III	5.39027	5.42673	0.992913	0.999999	-0.0364687	Tukey HSD test with ANOVA fit
ACE2	stage	THCA	Tumor	I-III	5.36669	5.42673	0.906909	0.999999	-0.0600432	Tukey HSD test with ANOVA fit
ACE2	stage	THCA	Tumor	I-II	5.36669	5.39027	0.997335	0.999999	-0.0235746	Tukey HSD test with ANOVA fit
ACE2	stage	THYM	Tumor	NA	NA	NA	NA	NA	NA	Tukey HSD test with ANOVA fit
ACE2	stage	UCEC	Tumor	NA	NA	NA	NA	NA	NA	Tukey HSD test with ANOVA fit
ACE2	stage	UCS	Tumor	NA	NA	NA	NA	NA	NA	Tukey HSD test with ANOVA fit
ACE2	stage	UVM	Tumor	NA	NA	NA	NA	NA	NA	Tukey HSD test with ANOVA fit
TMPRSS2	stage	ACC	Tumor	NA	NA	NA	NA	NA	NA	Tukey HSD test with ANOVA fit
TMPRSS2	stage	BLCA	Tumor	NA	NA	NA	NA	NA	NA	Tukey HSD test with ANOVA fit
TMPRSS2	stage	BRCA	Tumor	III-IV	7.58337	8.41526	0.222633	0.999999	-0.831892	Tukey HSD test with ANOVA fit
TMPRSS2	stage	BRCA	Tumor	II-IV	7.66006	8.41526	0.284503	0.999999	-0.755206	Tukey HSD test with ANOVA fit
TMPRSS2	stage	BRCA	Tumor	I-IV	7.85566	8.41526	0.582496	0.999999	-0.559605	Tukey HSD test with ANOVA fit
TMPRSS2	stage	BRCA	Tumor	II-III	7.66006	7.58337	0.94801	0.999999	0.0766864	Tukey HSD test with ANOVA fit
TMPRSS2	stage	BRCA	Tumor	I-III	7.85566	7.58337	0.44761	0.999999	0.272287	Tukey HSD test with ANOVA fit
TMPRSS2	stage	BRCA	Tumor	I-II	7.85566	7.66006	0.606561	0.999999	0.195601	Tukey HSD test with ANOVA fit
TMPRSS2	stage	CESC	Tumor	NA	NA	NA	NA	NA	NA	Tukey HSD test with ANOVA fit
TMPRSS2	stage	CHOL	Tumor	NA	NA	NA	NA	NA	NA	Tukey HSD test with ANOVA fit
TMPRSS2	stage	COAD	Tumor	III-IV	11.7964	11.7514	0.979037	0.999999	0.0450169	Tukey HSD test with ANOVA fit
TMPRSS2	stage	COAD	Tumor	II-IV	11.756	11.7514	0.999971	0.999999	0.0046874	Tukey HSD test with ANOVA fit
TMPRSS2	stage	COAD	Tumor	I-IV	11.8567	11.7514	0.837702	0.999999	0.105375	Tukey HSD test with ANOVA fit
TMPRSS2	stage	COAD	Tumor	II-III	11.756	11.7964	0.966268	0.999999	-0.0403295	Tukey HSD test with ANOVA fit
TMPRSS2	stage	COAD	Tumor	I-III	11.8567	11.7964	0.944264	0.999999	0.0603578	Tukey HSD test with ANOVA fit
TMPRSS2	stage	COAD	Tumor	I-II	11.8567	11.756	0.757194	0.999999	0.100687	Tukey HSD test with ANOVA fit
TMPRSS2	stage	DLBC	Tumor	NA	NA	NA	NA	NA	NA	Tukey HSD test with ANOVA fit
TMPRSS2	stage	ESCA	Tumor	NA	NA	NA	NA	NA	NA	Tukey HSD test with ANOVA fit
TMPRSS2	stage	GBM	Tumor	NA	NA	NA	NA	NA	NA	Tukey HSD test with ANOVA fit
TMPRSS2	stage	HNSC	Tumor	III-IV	6.27508	5.9626	0.804647	0.999999	0.312473	Tukey HSD test with ANOVA fit
TMPRSS2	stage	HNSC	Tumor	II-IV	5.68059	5.9626	0.863924	0.999999	-0.282012	Tukey HSD test with ANOVA fit
TMPRSS2	stage	HNSC	Tumor	I-IV	5.97031	5.9626	0.999999	0.999999	0.00770755	Tukey HSD test with ANOVA fit
TMPRSS2	stage	HNSC	Tumor	II-III	5.68059	6.27508	0.535542	0.999999	-0.594485	Tukey HSD test with ANOVA fit
TMPRSS2	stage	HNSC	Tumor	I-III	5.97031	6.27508	0.960521	0.999999	-0.304765	Tukey HSD test with ANOVA fit
TMPRSS2	stage	HNSC	Tumor	I-II	5.97031	5.68059	0.967092	0.999999	0.28972	Tukey HSD test with ANOVA fit
TMPRSS2	stage	KICH	Tumor	NA	NA	NA	NA	NA	NA	Tukey HSD test with ANOVA fit
TMPRSS2	stage	KIRC	Tumor	III-IV	3.90546	4.28261	0.651778	0.999999	-0.377152	Tukey HSD test with ANOVA fit
TMPRSS2	stage	KIRC	Tumor	II-IV	4.58994	4.28261	0.862581	0.999999	0.307331	Tukey HSD test with ANOVA fit
TMPRSS2	stage	KIRC	Tumor	I-IV	4.43507	4.28261	0.951908	0.999999	0.152463	Tukey HSD test with ANOVA fit
TMPRSS2	stage	KIRC	Tumor	II-III	4.58994	3.90546	0.240215	0.999999	0.684484	Tukey HSD test with ANOVA fit
TMPRSS2	stage	KIRC	Tumor	I-III	4.43507	3.90546	0.144873	0.999999	0.529615	Tukey HSD test with ANOVA fit
TMPRSS2	stage	KIRC	Tumor	I-II	4.43507	4.58994	0.966543	0.999999	-0.154869	Tukey HSD test with ANOVA fit
TMPRSS2	stage	KIRP	Tumor	III-IV	5.33862	4.70588	0.659787	0.999999	0.632743	Tukey HSD test with ANOVA fit
TMPRSS2	stage	KIRP	Tumor	II-IV	5.36465	4.70588	0.726709	0.999999	0.658769	Tukey HSD test with ANOVA fit
TMPRSS2	stage	KIRP	Tumor	I-IV	6.2138	4.70588	0.016275	0.333256	1.50792	Tukey HSD test with ANOVA fit
TMPRSS2	stage	KIRP	Tumor	II-III	5.36465	5.33862	0.999945	0.999999	0.0260266	Tukey HSD test with ANOVA fit
TMPRSS2	stage	KIRP	Tumor	I-III	6.2138	5.33862	0.0194399	0.333256	0.875182	Tukey HSD test with ANOVA fit
TMPRSS2	stage	KIRP	Tumor	I-II	6.2138	5.36465	0.206586	0.999999	0.849155	Tukey HSD test with ANOVA fit
TMPRSS2	stage	LAML	Tumor	NA	NA	NA	NA	NA	NA	Tukey HSD test with ANOVA fit
TMPRSS2	stage	LGG	Tumor	NA	NA	NA	NA	NA	NA	Tukey HSD test with ANOVA fit
TMPRSS2	stage	LIHC	Tumor	NA	NA	NA	NA	NA	NA	Tukey HSD test with ANOVA fit
TMPRSS2	stage	LUAD	Tumor	III-IV	10.1468	9.8367	0.839808	0.999999	0.31006	Tukey HSD test with ANOVA fit
TMPRSS2	stage	LUAD	Tumor	II-IV	10.4552	9.8367	0.313949	0.999999	0.618498	Tukey HSD test with ANOVA fit
TMPRSS2	stage	LUAD	Tumor	I-IV	10.8391	9.8367	0.0181516	0.333256	1.00243	Tukey HSD test with ANOVA fit
TMPRSS2	stage	LUAD	Tumor	II-III	10.4552	10.1468	0.559469	0.999999	0.308437	Tukey HSD test with ANOVA fit
TMPRSS2	stage	LUAD	Tumor	I-III	10.8391	10.1468	0.00502325	0.150697	0.692368	Tukey HSD test with ANOVA fit
TMPRSS2	stage	LUAD	Tumor	I-II	10.8391	10.4552	0.149991	0.999999	0.383931	Tukey HSD test with ANOVA fit
TMPRSS2	stage	LUSC	Tumor	NA	NA	NA	NA	NA	NA	Tukey HSD test with ANOVA fit
TMPRSS2	stage	MESO	Tumor	NA	NA	NA	NA	NA	NA	Tukey HSD test with ANOVA fit
TMPRSS2	stage	OV	Tumor	NA	NA	NA	NA	NA	NA	Tukey HSD test with ANOVA fit
TMPRSS2	stage	PAAD	Tumor	NA	NA	NA	NA	NA	NA	Tukey HSD test with ANOVA fit
TMPRSS2	stage	PCPG	Tumor	NA	NA	NA	NA	NA	NA	Tukey HSD test with ANOVA fit
TMPRSS2	stage	PRAD	Tumor	NA	NA	NA	NA	NA	NA	Tukey HSD test with ANOVA fit
TMPRSS2	stage	READ	Tumor	III-IV	11.6134	11.7879	0.840014	0.999999	-0.174554	Tukey HSD test with ANOVA fit
TMPRSS2	stage	READ	Tumor	II-IV	11.5923	11.7879	0.790057	0.999999	-0.195643	Tukey HSD test with ANOVA fit
TMPRSS2	stage	READ	Tumor	I-IV	12.0287	11.7879	0.728496	0.999999	0.240744	Tukey HSD test with ANOVA fit
TMPRSS2	stage	READ	Tumor	II-III	11.5923	11.6134	0.999253	0.999999	-0.0210893	Tukey HSD test with ANOVA fit
TMPRSS2	stage	READ	Tumor	I-III	12.0287	11.6134	0.137943	0.999999	0.415298	Tukey HSD test with ANOVA fit
TMPRSS2	stage	READ	Tumor	I-II	12.0287	11.5923	0.110702	0.999999	0.436387	Tukey HSD test with ANOVA fit
TMPRSS2	stage	SARC	Tumor	NA	NA	NA	NA	NA	NA	Tukey HSD test with ANOVA fit
TMPRSS2	stage	SKCMmets	Tumor	III-IV	3.93408	3.41047	0.501129	0.999999	0.523616	Tukey HSD test with ANOVA fit
TMPRSS2	stage	SKCMmets	Tumor	II-IV	3.84972	3.41047	0.682762	0.999999	0.439246	Tukey HSD test with ANOVA fit
TMPRSS2	stage	SKCMmets	Tumor	I-IV	3.70819	3.41047	0.875194	0.999999	0.297723	Tukey HSD test with ANOVA fit
TMPRSS2	stage	SKCMmets	Tumor	II-III	3.84972	3.93408	0.981893	0.999999	-0.0843696	Tukey HSD test with ANOVA fit
TMPRSS2	stage	SKCMmets	Tumor	I-III	3.70819	3.93408	0.746064	0.999999	-0.225893	Tukey HSD test with ANOVA fit
TMPRSS2	stage	SKCMmets	Tumor	I-II	3.70819	3.84972	0.946782	0.999999	-0.141523	Tukey HSD test with ANOVA fit
TMPRSS2	stage	SKCMprimary	Tumor	NA	NA	NA	NA	NA	NA	Tukey HSD test with ANOVA fit
TMPRSS2	stage	STAD	Tumor	III-IV	11.0355	11.1489	0.982685	0.999999	-0.11339	Tukey HSD test with ANOVA fit
TMPRSS2	stage	STAD	Tumor	II-IV	11.0728	11.1489	0.995075	0.999999	-0.0760205	Tukey HSD test with ANOVA fit
TMPRSS2	stage	STAD	Tumor	I-IV	11.2423	11.1489	0.993889	0.999999	0.0934038	Tukey HSD test with ANOVA fit
TMPRSS2	stage	STAD	Tumor	II-III	11.0728	11.0355	0.997465	0.999999	0.0373692	Tukey HSD test with ANOVA fit
TMPRSS2	stage	STAD	Tumor	I-III	11.2423	11.0355	0.857494	0.999999	0.206794	Tukey HSD test with ANOVA fit
TMPRSS2	stage	STAD	Tumor	I-II	11.2423	11.0728	0.924159	0.999999	0.169424	Tukey HSD test with ANOVA fit
TMPRSS2	stage	TGCT	Tumor	NA	NA	NA	NA	NA	NA	Tukey HSD test with ANOVA fit
TMPRSS2	stage	THCA	Tumor	III-IV	8.75028	8.40345	0.533252	0.999999	0.346831	Tukey HSD test with ANOVA fit
TMPRSS2	stage	THCA	Tumor	II-IV	7.67464	8.40345	0.0765114	0.999999	-0.728815	Tukey HSD test with ANOVA fit
TMPRSS2	stage	THCA	Tumor	I-IV	8.59681	8.40345	0.835967	0.999999	0.193362	Tukey HSD test with ANOVA fit
TMPRSS2	stage	THCA	Tumor	II-III	7.67464	8.75028	0.000281562	0.02457	-1.07565	Tukey HSD test with ANOVA fit
TMPRSS2	stage	THCA	Tumor	I-III	8.59681	8.75028	0.816083	0.999999	-0.15347	Tukey HSD test with ANOVA fit
TMPRSS2	stage	THCA	Tumor	I-II	8.59681	7.67464	0.00061425	0.02457	0.922176	Tukey HSD test with ANOVA fit
TMPRSS2	stage	THYM	Tumor	NA	NA	NA	NA	NA	NA	Tukey HSD test with ANOVA fit
TMPRSS2	stage	UCEC	Tumor	NA	NA	NA	NA	NA	NA	Tukey HSD test with ANOVA fit
TMPRSS2	stage	UCS	Tumor	NA	NA	NA	NA	NA	NA	Tukey HSD test with ANOVA fit
TMPRSS2	stage	UVM	Tumor	NA	NA	NA	NA	NA	NA	Tukey HSD test with ANOVA fit
ACE2	grade	ACC	Tumor	NA	NA	NA	NA	NA	NA	Welch Two Sample t-test
ACE2	grade	BLCA	Tumor	G1G2-G3G4	4.6325	4.91963	0.384127	0.614603	-0.287132	Welch Two Sample t-test
ACE2	grade	BRCA	Tumor	NA	NA	NA	NA	NA	NA	Welch Two Sample t-test
ACE2	grade	CESC	Tumor	G1G2-G3G4	6.04891	5.67821	0.0738626	0.161155	0.370705	Welch Two Sample t-test
ACE2	grade	CHOL	Tumor	G1G2-G3G4	6.71372	6.95978	0.810806	0.926636	-0.246056	Welch Two Sample t-test
ACE2	grade	COAD	Tumor	NA	NA	NA	NA	NA	NA	Welch Two Sample t-test
ACE2	grade	DLBC	Tumor	NA	NA	NA	NA	NA	NA	Welch Two Sample t-test
ACE2	grade	ESCA	Tumor	G1G2-G3G4	6.10806	5.77781	0.446055	0.629724	0.330248	Welch Two Sample t-test
ACE2	grade	GBM	Tumor	NA	NA	NA	NA	NA	NA	Welch Two Sample t-test
ACE2	grade	HNSC	Tumor	G1G2-G3G4	6.38108	5.59117	1.5e-05	0.000119986	0.789916	Welch Two Sample t-test
ACE2	grade	KICH	Tumor	NA	NA	NA	NA	NA	NA	Welch Two Sample t-test
ACE2	grade	KIRC	Tumor	G1G2-G3G4	9.88699	9.28749	0.0119808	0.0316017	0.5995	Welch Two Sample t-test
ACE2	grade	KIRP	Tumor	NA	NA	NA	NA	NA	NA	Welch Two Sample t-test
ACE2	grade	LAML	Tumor	NA	NA	NA	NA	NA	NA	Welch Two Sample t-test
ACE2	grade	LGG	Tumor	G1G2-G3G4	2.5858	2.72297	0.0123583	0.0316017	-0.137166	Welch Two Sample t-test
ACE2	grade	LIHC	Tumor	G1G2-G3G4	5.3921	4.65896	0.0131674	0.0316017	0.73314	Welch Two Sample t-test
ACE2	grade	LUAD	Tumor	NA	NA	NA	NA	NA	NA	Welch Two Sample t-test
ACE2	grade	LUSC	Tumor	NA	NA	NA	NA	NA	NA	Welch Two Sample t-test
ACE2	grade	MESO	Tumor	NA	NA	NA	NA	NA	NA	Welch Two Sample t-test
ACE2	grade	OV	Tumor	G1G2-G3G4	3.80464	4.01031	0.4184	0.6276	-0.205668	Welch Two Sample t-test
ACE2	grade	PAAD	Tumor	G1G2-G3G4	7.29671	7.26001	0.913158	0.940703	0.036699	Welch Two Sample t-test
ACE2	grade	PCPG	Tumor	NA	NA	NA	NA	NA	NA	Welch Two Sample t-test
ACE2	grade	PRAD	Tumor	NA	NA	NA	NA	NA	NA	Welch Two Sample t-test
ACE2	grade	READ	Tumor	NA	NA	NA	NA	NA	NA	Welch Two Sample t-test
ACE2	grade	SARC	Tumor	NA	NA	NA	NA	NA	NA	Welch Two Sample t-test
ACE2	grade	SKCMmets	Tumor	NA	NA	NA	NA	NA	NA	Welch Two Sample t-test
ACE2	grade	SKCMprimary	Tumor	NA	NA	NA	NA	NA	NA	Welch Two Sample t-test
ACE2	grade	STAD	Tumor	G1G2-G3G4	6.72929	6.64316	0.747654	0.897185	0.0861383	Welch Two Sample t-test
ACE2	grade	TGCT	Tumor	NA	NA	NA	NA	NA	NA	Welch Two Sample t-test
ACE2	grade	THCA	Tumor	NA	NA	NA	NA	NA	NA	Welch Two Sample t-test
ACE2	grade	THYM	Tumor	NA	NA	NA	NA	NA	NA	Welch Two Sample t-test
ACE2	grade	UCEC	Tumor	G1G2-G3G4	5.10668	4.59817	3.94e-05	0.000189071	0.508514	Welch Two Sample t-test
ACE2	grade	UCS	Tumor	NA	NA	NA	NA	NA	NA	Welch Two Sample t-test
ACE2	grade	UVM	Tumor	NA	NA	NA	NA	NA	NA	Welch Two Sample t-test
TMPRSS2	grade	ACC	Tumor	NA	NA	NA	NA	NA	NA	Welch Two Sample t-test
TMPRSS2	grade	BLCA	Tumor	G1G2-G3G4	10.6196	8.88542	3.81e-05	0.000189071	1.73421	Welch Two Sample t-test
TMPRSS2	grade	BRCA	Tumor	NA	NA	NA	NA	NA	NA	Welch Two Sample t-test
TMPRSS2	grade	CESC	Tumor	G1G2-G3G4	8.59874	7.38264	5.77e-05	0.000230807	1.21609	Welch Two Sample t-test
TMPRSS2	grade	CHOL	Tumor	G1G2-G3G4	10.4867	9.61261	0.211922	0.363295	0.874066	Welch Two Sample t-test
TMPRSS2	grade	COAD	Tumor	NA	NA	NA	NA	NA	NA	Welch Two Sample t-test
TMPRSS2	grade	DLBC	Tumor	NA	NA	NA	NA	NA	NA	Welch Two Sample t-test
TMPRSS2	grade	ESCA	Tumor	G1G2-G3G4	8.20365	9.00827	0.18311	0.33805	-0.804617	Welch Two Sample t-test
TMPRSS2	grade	GBM	Tumor	NA	NA	NA	NA	NA	NA	Welch Two Sample t-test
TMPRSS2	grade	HNSC	Tumor	G1G2-G3G4	5.94254	6.41547	0.115297	0.230595	-0.472936	Welch Two Sample t-test
TMPRSS2	grade	KICH	Tumor	NA	NA	NA	NA	NA	NA	Welch Two Sample t-test
TMPRSS2	grade	KIRC	Tumor	G1G2-G3G4	4.16444	4.2934	0.497982	0.663977	-0.128954	Welch Two Sample t-test
TMPRSS2	grade	KIRP	Tumor	NA	NA	NA	NA	NA	NA	Welch Two Sample t-test
TMPRSS2	grade	LAML	Tumor	NA	NA	NA	NA	NA	NA	Welch Two Sample t-test
TMPRSS2	grade	LGG	Tumor	G1G2-G3G4	3.18811	3.18085	0.940703	0.940703	0.00725271	Welch Two Sample t-test
TMPRSS2	grade	LIHC	Tumor	G1G2-G3G4	9.72305	9.13396	0.000604468	0.00207246	0.589092	Welch Two Sample t-test
TMPRSS2	grade	LUAD	Tumor	NA	NA	NA	NA	NA	NA	Welch Two Sample t-test
TMPRSS2	grade	LUSC	Tumor	NA	NA	NA	NA	NA	NA	Welch Two Sample t-test
TMPRSS2	grade	MESO	Tumor	NA	NA	NA	NA	NA	NA	Welch Two Sample t-test
TMPRSS2	grade	OV	Tumor	G1G2-G3G4	5.31846	5.26846	0.904917	0.940703	0.0500031	Welch Two Sample t-test
TMPRSS2	grade	PAAD	Tumor	G1G2-G3G4	10.4872	10.3936	0.729434	0.897185	0.0935537	Welch Two Sample t-test
TMPRSS2	grade	PCPG	Tumor	NA	NA	NA	NA	NA	NA	Welch Two Sample t-test
TMPRSS2	grade	PRAD	Tumor	NA	NA	NA	NA	NA	NA	Welch Two Sample t-test
TMPRSS2	grade	READ	Tumor	NA	NA	NA	NA	NA	NA	Welch Two Sample t-test
TMPRSS2	grade	SARC	Tumor	NA	NA	NA	NA	NA	NA	Welch Two Sample t-test
TMPRSS2	grade	SKCMmets	Tumor	NA	NA	NA	NA	NA	NA	Welch Two Sample t-test
TMPRSS2	grade	SKCMprimary	Tumor	NA	NA	NA	NA	NA	NA	Welch Two Sample t-test
TMPRSS2	grade	STAD	Tumor	G1G2-G3G4	11.5418	10.7794	6.59e-07	7.91e-06	0.762446	Welch Two Sample t-test
TMPRSS2	grade	TGCT	Tumor	NA	NA	NA	NA	NA	NA	Welch Two Sample t-test
TMPRSS2	grade	THCA	Tumor	NA	NA	NA	NA	NA	NA	Welch Two Sample t-test
TMPRSS2	grade	THYM	Tumor	NA	NA	NA	NA	NA	NA	Welch Two Sample t-test
TMPRSS2	grade	UCEC	Tumor	G1G2-G3G4	9.56445	8.38935	1.04e-17	2.5e-16	1.1751	Welch Two Sample t-test
TMPRSS2	grade	UCS	Tumor	NA	NA	NA	NA	NA	NA	Welch Two Sample t-test
TMPRSS2	grade	UVM	Tumor	NA	NA	NA	NA	NA	NA	Welch Two Sample t-test
ACE2	menopause	ACC	Normal	NA	NA	NA	NA	NA	NA	Welch Two Sample t-test
ACE2	menopause	ACC	Tumor	NA	NA	NA	NA	NA	NA	Welch Two Sample t-test
ACE2	menopause	BLCA	Normal	NA	NA	NA	NA	NA	NA	Welch Two Sample t-test
ACE2	menopause	BLCA	Tumor	NA	NA	NA	NA	NA	NA	Welch Two Sample t-test
ACE2	menopause	BRCA	Normal	NotPost-Post	5.01833	4.71753	0.195277	0.390553	0.300798	Welch Two Sample t-test
ACE2	menopause	BRCA	Tumor	NotPost-Post	3.26623	3.17084	0.475121	0.579681	0.0953935	Welch Two Sample t-test
ACE2	menopause	CESC	Normal	NA	NA	NA	NA	NA	NA	Welch Two Sample t-test
ACE2	menopause	CESC	Tumor	NotPost-Post	5.8075	6.23096	0.0808358	0.323343	-0.423464	Welch Two Sample t-test
ACE2	menopause	CHOL	Normal	NA	NA	NA	NA	NA	NA	Welch Two Sample t-test
ACE2	menopause	CHOL	Tumor	NA	NA	NA	NA	NA	NA	Welch Two Sample t-test
ACE2	menopause	COAD	Normal	NA	NA	NA	NA	NA	NA	Welch Two Sample t-test
ACE2	menopause	COAD	Tumor	NA	NA	NA	NA	NA	NA	Welch Two Sample t-test
ACE2	menopause	DLBC	Normal	NA	NA	NA	NA	NA	NA	Welch Two Sample t-test
ACE2	menopause	DLBC	Tumor	NA	NA	NA	NA	NA	NA	Welch Two Sample t-test
ACE2	menopause	ESCA	Normal	NA	NA	NA	NA	NA	NA	Welch Two Sample t-test
ACE2	menopause	ESCA	Tumor	NA	NA	NA	NA	NA	NA	Welch Two Sample t-test
ACE2	menopause	GBM	Normal	NA	NA	NA	NA	NA	NA	Welch Two Sample t-test
ACE2	menopause	GBM	Tumor	NA	NA	NA	NA	NA	NA	Welch Two Sample t-test
ACE2	menopause	HNSC	Normal	NA	NA	NA	NA	NA	NA	Welch Two Sample t-test
ACE2	menopause	HNSC	Tumor	NA	NA	NA	NA	NA	NA	Welch Two Sample t-test
ACE2	menopause	KICH	Normal	NA	NA	NA	NA	NA	NA	Welch Two Sample t-test
ACE2	menopause	KICH	Tumor	NA	NA	NA	NA	NA	NA	Welch Two Sample t-test
ACE2	menopause	KIRC	Normal	NA	NA	NA	NA	NA	NA	Welch Two Sample t-test
ACE2	menopause	KIRC	Tumor	NA	NA	NA	NA	NA	NA	Welch Two Sample t-test
ACE2	menopause	KIRP	Normal	NA	NA	NA	NA	NA	NA	Welch Two Sample t-test
ACE2	menopause	KIRP	Tumor	NA	NA	NA	NA	NA	NA	Welch Two Sample t-test
ACE2	menopause	LAML	Normal	NA	NA	NA	NA	NA	NA	Welch Two Sample t-test
ACE2	menopause	LAML	Tumor	NA	NA	NA	NA	NA	NA	Welch Two Sample t-test
ACE2	menopause	LGG	Normal	NA	NA	NA	NA	NA	NA	Welch Two Sample t-test
ACE2	menopause	LGG	Tumor	NA	NA	NA	NA	NA	NA	Welch Two Sample t-test
ACE2	menopause	LIHC	Normal	NA	NA	NA	NA	NA	NA	Welch Two Sample t-test
ACE2	menopause	LIHC	Tumor	NA	NA	NA	NA	NA	NA	Welch Two Sample t-test
ACE2	menopause	LUAD	Normal	NA	NA	NA	NA	NA	NA	Welch Two Sample t-test
ACE2	menopause	LUAD	Tumor	NA	NA	NA	NA	NA	NA	Welch Two Sample t-test
ACE2	menopause	LUSC	Normal	NA	NA	NA	NA	NA	NA	Welch Two Sample t-test
ACE2	menopause	LUSC	Tumor	NA	NA	NA	NA	NA	NA	Welch Two Sample t-test
ACE2	menopause	MESO	Normal	NA	NA	NA	NA	NA	NA	Welch Two Sample t-test
ACE2	menopause	MESO	Tumor	NA	NA	NA	NA	NA	NA	Welch Two Sample t-test
ACE2	menopause	OV	Normal	NA	NA	NA	NA	NA	NA	Welch Two Sample t-test
ACE2	menopause	OV	Tumor	NA	NA	NA	NA	NA	NA	Welch Two Sample t-test
ACE2	menopause	PAAD	Normal	NA	NA	NA	NA	NA	NA	Welch Two Sample t-test
ACE2	menopause	PAAD	Tumor	NA	NA	NA	NA	NA	NA	Welch Two Sample t-test
ACE2	menopause	PCPG	Normal	NA	NA	NA	NA	NA	NA	Welch Two Sample t-test
ACE2	menopause	PCPG	Tumor	NA	NA	NA	NA	NA	NA	Welch Two Sample t-test
ACE2	menopause	PRAD	Normal	NA	NA	NA	NA	NA	NA	Welch Two Sample t-test
ACE2	menopause	PRAD	Tumor	NA	NA	NA	NA	NA	NA	Welch Two Sample t-test
ACE2	menopause	READ	Normal	NA	NA	NA	NA	NA	NA	Welch Two Sample t-test
ACE2	menopause	READ	Tumor	NA	NA	NA	NA	NA	NA	Welch Two Sample t-test
ACE2	menopause	SARC	Normal	NA	NA	NA	NA	NA	NA	Welch Two Sample t-test
ACE2	menopause	SARC	Tumor	NA	NA	NA	NA	NA	NA	Welch Two Sample t-test
ACE2	menopause	SKCMmets	Normal	NA	NA	NA	NA	NA	NA	Welch Two Sample t-test
ACE2	menopause	SKCMmets	Tumor	NA	NA	NA	NA	NA	NA	Welch Two Sample t-test
ACE2	menopause	SKCMprimary	Normal	NA	NA	NA	NA	NA	NA	Welch Two Sample t-test
ACE2	menopause	SKCMprimary	Tumor	NA	NA	NA	NA	NA	NA	Welch Two Sample t-test
ACE2	menopause	STAD	Normal	NA	NA	NA	NA	NA	NA	Welch Two Sample t-test
ACE2	menopause	STAD	Tumor	NA	NA	NA	NA	NA	NA	Welch Two Sample t-test
ACE2	menopause	TGCT	Normal	NA	NA	NA	NA	NA	NA	Welch Two Sample t-test
ACE2	menopause	TGCT	Tumor	NA	NA	NA	NA	NA	NA	Welch Two Sample t-test
ACE2	menopause	THCA	Normal	NA	NA	NA	NA	NA	NA	Welch Two Sample t-test
ACE2	menopause	THCA	Tumor	NA	NA	NA	NA	NA	NA	Welch Two Sample t-test
ACE2	menopause	THYM	Normal	NA	NA	NA	NA	NA	NA	Welch Two Sample t-test
ACE2	menopause	THYM	Tumor	NA	NA	NA	NA	NA	NA	Welch Two Sample t-test
ACE2	menopause	UCEC	Normal	NA	NA	NA	NA	NA	NA	Welch Two Sample t-test
ACE2	menopause	UCEC	Tumor	NotPost-Post	4.94404	4.80628	0.489352	0.579681	0.137758	Welch Two Sample t-test
ACE2	menopause	UCS	Normal	NA	NA	NA	NA	NA	NA	Welch Two Sample t-test
ACE2	menopause	UCS	Tumor	NA	NA	NA	NA	NA	NA	Welch Two Sample t-test
ACE2	menopause	UVM	Normal	NA	NA	NA	NA	NA	NA	Welch Two Sample t-test
ACE2	menopause	UVM	Tumor	NA	NA	NA	NA	NA	NA	Welch Two Sample t-test
TMPRSS2	menopause	ACC	Normal	NA	NA	NA	NA	NA	NA	Welch Two Sample t-test
TMPRSS2	menopause	ACC	Tumor	NA	NA	NA	NA	NA	NA	Welch Two Sample t-test
TMPRSS2	menopause	BLCA	Normal	NA	NA	NA	NA	NA	NA	Welch Two Sample t-test
TMPRSS2	menopause	BLCA	Tumor	NA	NA	NA	NA	NA	NA	Welch Two Sample t-test
TMPRSS2	menopause	BRCA	Normal	NotPost-Post	9.35408	8.36339	0.0756979	0.323343	0.990684	Welch Two Sample t-test
TMPRSS2	menopause	BRCA	Tumor	NotPost-Post	7.62839	7.71337	0.507221	0.579681	-0.0849847	Welch Two Sample t-test
TMPRSS2	menopause	CESC	Normal	NA	NA	NA	NA	NA	NA	Welch Two Sample t-test
TMPRSS2	menopause	CESC	Tumor	NotPost-Post	8.2562	8.21526	0.904626	0.904626	0.040941	Welch Two Sample t-test
TMPRSS2	menopause	CHOL	Normal	NA	NA	NA	NA	NA	NA	Welch Two Sample t-test
TMPRSS2	menopause	CHOL	Tumor	NA	NA	NA	NA	NA	NA	Welch Two Sample t-test
TMPRSS2	menopause	COAD	Normal	NA	NA	NA	NA	NA	NA	Welch Two Sample t-test
TMPRSS2	menopause	COAD	Tumor	NA	NA	NA	NA	NA	NA	Welch Two Sample t-test
TMPRSS2	menopause	DLBC	Normal	NA	NA	NA	NA	NA	NA	Welch Two Sample t-test
TMPRSS2	menopause	DLBC	Tumor	NA	NA	NA	NA	NA	NA	Welch Two Sample t-test
TMPRSS2	menopause	ESCA	Normal	NA	NA	NA	NA	NA	NA	Welch Two Sample t-test
TMPRSS2	menopause	ESCA	Tumor	NA	NA	NA	NA	NA	NA	Welch Two Sample t-test
TMPRSS2	menopause	GBM	Normal	NA	NA	NA	NA	NA	NA	Welch Two Sample t-test
TMPRSS2	menopause	GBM	Tumor	NA	NA	NA	NA	NA	NA	Welch Two Sample t-test
TMPRSS2	menopause	HNSC	Normal	NA	NA	NA	NA	NA	NA	Welch Two Sample t-test
TMPRSS2	menopause	HNSC	Tumor	NA	NA	NA	NA	NA	NA	Welch Two Sample t-test
TMPRSS2	menopause	KICH	Normal	NA	NA	NA	NA	NA	NA	Welch Two Sample t-test
TMPRSS2	menopause	KICH	Tumor	NA	NA	NA	NA	NA	NA	Welch Two Sample t-test
TMPRSS2	menopause	KIRC	Normal	NA	NA	NA	NA	NA	NA	Welch Two Sample t-test
TMPRSS2	menopause	KIRC	Tumor	NA	NA	NA	NA	NA	NA	Welch Two Sample t-test
TMPRSS2	menopause	KIRP	Normal	NA	NA	NA	NA	NA	NA	Welch Two Sample t-test
TMPRSS2	menopause	KIRP	Tumor	NA	NA	NA	NA	NA	NA	Welch Two Sample t-test
TMPRSS2	menopause	LAML	Normal	NA	NA	NA	NA	NA	NA	Welch Two Sample t-test
TMPRSS2	menopause	LAML	Tumor	NA	NA	NA	NA	NA	NA	Welch Two Sample t-test
TMPRSS2	menopause	LGG	Normal	NA	NA	NA	NA	NA	NA	Welch Two Sample t-test
TMPRSS2	menopause	LGG	Tumor	NA	NA	NA	NA	NA	NA	Welch Two Sample t-test
TMPRSS2	menopause	LIHC	Normal	NA	NA	NA	NA	NA	NA	Welch Two Sample t-test
TMPRSS2	menopause	LIHC	Tumor	NA	NA	NA	NA	NA	NA	Welch Two Sample t-test
TMPRSS2	menopause	LUAD	Normal	NA	NA	NA	NA	NA	NA	Welch Two Sample t-test
TMPRSS2	menopause	LUAD	Tumor	NA	NA	NA	NA	NA	NA	Welch Two Sample t-test
TMPRSS2	menopause	LUSC	Normal	NA	NA	NA	NA	NA	NA	Welch Two Sample t-test
TMPRSS2	menopause	LUSC	Tumor	NA	NA	NA	NA	NA	NA	Welch Two Sample t-test
TMPRSS2	menopause	MESO	Normal	NA	NA	NA	NA	NA	NA	Welch Two Sample t-test
TMPRSS2	menopause	MESO	Tumor	NA	NA	NA	NA	NA	NA	Welch Two Sample t-test
TMPRSS2	menopause	OV	Normal	NA	NA	NA	NA	NA	NA	Welch Two Sample t-test
TMPRSS2	menopause	OV	Tumor	NA	NA	NA	NA	NA	NA	Welch Two Sample t-test
TMPRSS2	menopause	PAAD	Normal	NA	NA	NA	NA	NA	NA	Welch Two Sample t-test
TMPRSS2	menopause	PAAD	Tumor	NA	NA	NA	NA	NA	NA	Welch Two Sample t-test
TMPRSS2	menopause	PCPG	Normal	NA	NA	NA	NA	NA	NA	Welch Two Sample t-test
TMPRSS2	menopause	PCPG	Tumor	NA	NA	NA	NA	NA	NA	Welch Two Sample t-test
TMPRSS2	menopause	PRAD	Normal	NA	NA	NA	NA	NA	NA	Welch Two Sample t-test
TMPRSS2	menopause	PRAD	Tumor	NA	NA	NA	NA	NA	NA	Welch Two Sample t-test
TMPRSS2	menopause	READ	Normal	NA	NA	NA	NA	NA	NA	Welch Two Sample t-test
TMPRSS2	menopause	READ	Tumor	NA	NA	NA	NA	NA	NA	Welch Two Sample t-test
TMPRSS2	menopause	SARC	Normal	NA	NA	NA	NA	NA	NA	Welch Two Sample t-test
TMPRSS2	menopause	SARC	Tumor	NA	NA	NA	NA	NA	NA	Welch Two Sample t-test
TMPRSS2	menopause	SKCMmets	Normal	NA	NA	NA	NA	NA	NA	Welch Two Sample t-test
TMPRSS2	menopause	SKCMmets	Tumor	NA	NA	NA	NA	NA	NA	Welch Two Sample t-test
TMPRSS2	menopause	SKCMprimary	Normal	NA	NA	NA	NA	NA	NA	Welch Two Sample t-test
TMPRSS2	menopause	SKCMprimary	Tumor	NA	NA	NA	NA	NA	NA	Welch Two Sample t-test
TMPRSS2	menopause	STAD	Normal	NA	NA	NA	NA	NA	NA	Welch Two Sample t-test
TMPRSS2	menopause	STAD	Tumor	NA	NA	NA	NA	NA	NA	Welch Two Sample t-test
TMPRSS2	menopause	TGCT	Normal	NA	NA	NA	NA	NA	NA	Welch Two Sample t-test
TMPRSS2	menopause	TGCT	Tumor	NA	NA	NA	NA	NA	NA	Welch Two Sample t-test
TMPRSS2	menopause	THCA	Normal	NA	NA	NA	NA	NA	NA	Welch Two Sample t-test
TMPRSS2	menopause	THCA	Tumor	NA	NA	NA	NA	NA	NA	Welch Two Sample t-test
TMPRSS2	menopause	THYM	Normal	NA	NA	NA	NA	NA	NA	Welch Two Sample t-test
TMPRSS2	menopause	THYM	Tumor	NA	NA	NA	NA	NA	NA	Welch Two Sample t-test
TMPRSS2	menopause	UCEC	Normal	NA	NA	NA	NA	NA	NA	Welch Two Sample t-test
TMPRSS2	menopause	UCEC	Tumor	NotPost-Post	9.17032	8.85609	0.141209	0.376557	0.31423	Welch Two Sample t-test
TMPRSS2	menopause	UCS	Normal	NA	NA	NA	NA	NA	NA	Welch Two Sample t-test
TMPRSS2	menopause	UCS	Tumor	NA	NA	NA	NA	NA	NA	Welch Two Sample t-test
TMPRSS2	menopause	UVM	Normal	NA	NA	NA	NA	NA	NA	Welch Two Sample t-test
TMPRSS2	menopause	UVM	Tumor	NA	NA	NA	NA	NA	NA	Welch Two Sample t-test
ACE2	bmi.group	ACC	Normal	NA	NA	NA	NA	NA	NA	Tukey HSD test with ANOVA fit
ACE2	bmi.group	ACC	Tumor	NA	NA	NA	NA	NA	NA	Tukey HSD test with ANOVA fit
ACE2	bmi.group	BLCA	Normal	NA	NA	NA	NA	NA	NA	Tukey HSD test with ANOVA fit
ACE2	bmi.group	BLCA	Tumor	level3-level4	4.77946	5.26713	0.723795	0.99999	-0.487664	Tukey HSD test with ANOVA fit
ACE2	bmi.group	BLCA	Tumor	level2-level4	4.93102	5.26713	0.85101	0.99999	-0.336105	Tukey HSD test with ANOVA fit
ACE2	bmi.group	BLCA	Tumor	level1-level4	4.84397	5.26713	0.72968	0.99999	-0.423162	Tukey HSD test with ANOVA fit
ACE2	bmi.group	BLCA	Tumor	level2-level3	4.93102	4.77946	0.969921	0.99999	0.151559	Tukey HSD test with ANOVA fit
ACE2	bmi.group	BLCA	Tumor	level1-level3	4.84397	4.77946	0.997335	0.99999	0.0645016	Tukey HSD test with ANOVA fit
ACE2	bmi.group	BLCA	Tumor	level1-level2	4.84397	4.93102	0.985818	0.99999	-0.0870569	Tukey HSD test with ANOVA fit
ACE2	bmi.group	BRCA	Normal	NA	NA	NA	NA	NA	NA	Tukey HSD test with ANOVA fit
ACE2	bmi.group	BRCA	Tumor	NA	NA	NA	NA	NA	NA	Tukey HSD test with ANOVA fit
ACE2	bmi.group	CESC	Normal	NA	NA	NA	NA	NA	NA	Tukey HSD test with ANOVA fit
ACE2	bmi.group	CESC	Tumor	level3-level4	5.84769	5.88317	0.999709	0.99999	-0.0354813	Tukey HSD test with ANOVA fit
ACE2	bmi.group	CESC	Tumor	level2-level4	5.93224	5.88317	0.998943	0.99999	0.0490658	Tukey HSD test with ANOVA fit
ACE2	bmi.group	CESC	Tumor	level1-level4	5.97311	5.88317	0.992554	0.99999	0.0899356	Tukey HSD test with ANOVA fit
ACE2	bmi.group	CESC	Tumor	level2-level3	5.93224	5.84769	0.994439	0.99999	0.0845471	Tukey HSD test with ANOVA fit
ACE2	bmi.group	CESC	Tumor	level1-level3	5.97311	5.84769	0.979405	0.99999	0.125417	Tukey HSD test with ANOVA fit
ACE2	bmi.group	CESC	Tumor	level1-level2	5.97311	5.93224	0.998785	0.99999	0.0408698	Tukey HSD test with ANOVA fit
ACE2	bmi.group	CHOL	Normal	NA	NA	NA	NA	NA	NA	Tukey HSD test with ANOVA fit
ACE2	bmi.group	CHOL	Tumor	NA	NA	NA	NA	NA	NA	Tukey HSD test with ANOVA fit
ACE2	bmi.group	COAD	Normal	NA	NA	NA	NA	NA	NA	Tukey HSD test with ANOVA fit
ACE2	bmi.group	COAD	Tumor	level3-level4	8.84119	8.39209	0.858471	0.99999	0.449106	Tukey HSD test with ANOVA fit
ACE2	bmi.group	COAD	Tumor	level2-level4	8.85561	8.39209	0.779938	0.99999	0.463524	Tukey HSD test with ANOVA fit
ACE2	bmi.group	COAD	Tumor	level1-level4	8.61391	8.39209	0.969379	0.99999	0.221827	Tukey HSD test with ANOVA fit
ACE2	bmi.group	COAD	Tumor	level2-level3	8.85561	8.84119	0.99999	0.99999	0.0144181	Tukey HSD test with ANOVA fit
ACE2	bmi.group	COAD	Tumor	level1-level3	8.61391	8.84119	0.965436	0.99999	-0.227279	Tukey HSD test with ANOVA fit
ACE2	bmi.group	COAD	Tumor	level1-level2	8.61391	8.85561	0.924874	0.99999	-0.241697	Tukey HSD test with ANOVA fit
ACE2	bmi.group	DLBC	Normal	NA	NA	NA	NA	NA	NA	Tukey HSD test with ANOVA fit
ACE2	bmi.group	DLBC	Tumor	NA	NA	NA	NA	NA	NA	Tukey HSD test with ANOVA fit
ACE2	bmi.group	ESCA	Normal	NA	NA	NA	NA	NA	NA	Tukey HSD test with ANOVA fit
ACE2	bmi.group	ESCA	Tumor	NA	NA	NA	NA	NA	NA	Tukey HSD test with ANOVA fit
ACE2	bmi.group	GBM	Normal	NA	NA	NA	NA	NA	NA	Tukey HSD test with ANOVA fit
ACE2	bmi.group	GBM	Tumor	NA	NA	NA	NA	NA	NA	Tukey HSD test with ANOVA fit
ACE2	bmi.group	HNSC	Normal	NA	NA	NA	NA	NA	NA	Tukey HSD test with ANOVA fit
ACE2	bmi.group	HNSC	Tumor	NA	NA	NA	NA	NA	NA	Tukey HSD test with ANOVA fit
ACE2	bmi.group	KICH	Normal	NA	NA	NA	NA	NA	NA	Tukey HSD test with ANOVA fit
ACE2	bmi.group	KICH	Tumor	NA	NA	NA	NA	NA	NA	Tukey HSD test with ANOVA fit
ACE2	bmi.group	KIRC	Normal	NA	NA	NA	NA	NA	NA	Tukey HSD test with ANOVA fit
ACE2	bmi.group	KIRC	Tumor	NA	NA	NA	NA	NA	NA	Tukey HSD test with ANOVA fit
ACE2	bmi.group	KIRP	Normal	NA	NA	NA	NA	NA	NA	Tukey HSD test with ANOVA fit
ACE2	bmi.group	KIRP	Tumor	level3-level4	10.4851	10.8367	0.925361	0.99999	-0.351673	Tukey HSD test with ANOVA fit
ACE2	bmi.group	KIRP	Tumor	level2-level4	10.6345	10.8367	0.976713	0.99999	-0.202285	Tukey HSD test with ANOVA fit
ACE2	bmi.group	KIRP	Tumor	level1-level4	9.96181	10.8367	0.373762	0.99999	-0.87493	Tukey HSD test with ANOVA fit
ACE2	bmi.group	KIRP	Tumor	level2-level3	10.6345	10.4851	0.988664	0.99999	0.149388	Tukey HSD test with ANOVA fit
ACE2	bmi.group	KIRP	Tumor	level1-level3	9.96181	10.4851	0.744447	0.99999	-0.523257	Tukey HSD test with ANOVA fit
ACE2	bmi.group	KIRP	Tumor	level1-level2	9.96181	10.6345	0.417682	0.99999	-0.672645	Tukey HSD test with ANOVA fit
ACE2	bmi.group	LAML	Normal	NA	NA	NA	NA	NA	NA	Tukey HSD test with ANOVA fit
ACE2	bmi.group	LAML	Tumor	NA	NA	NA	NA	NA	NA	Tukey HSD test with ANOVA fit
ACE2	bmi.group	LGG	Normal	NA	NA	NA	NA	NA	NA	Tukey HSD test with ANOVA fit
ACE2	bmi.group	LGG	Tumor	NA	NA	NA	NA	NA	NA	Tukey HSD test with ANOVA fit
ACE2	bmi.group	LIHC	Normal	NA	NA	NA	NA	NA	NA	Tukey HSD test with ANOVA fit
ACE2	bmi.group	LIHC	Tumor	level3-level4	5.57375	5.86271	0.974381	0.99999	-0.288966	Tukey HSD test with ANOVA fit
ACE2	bmi.group	LIHC	Tumor	level2-level4	5.2364	5.86271	0.705626	0.99999	-0.626309	Tukey HSD test with ANOVA fit
ACE2	bmi.group	LIHC	Tumor	level1-level4	4.8786	5.86271	0.272734	0.99999	-0.984117	Tukey HSD test with ANOVA fit
ACE2	bmi.group	LIHC	Tumor	level2-level3	5.2364	5.57375	0.926655	0.99999	-0.337344	Tukey HSD test with ANOVA fit
ACE2	bmi.group	LIHC	Tumor	level1-level3	4.8786	5.57375	0.516996	0.99999	-0.695151	Tukey HSD test with ANOVA fit
ACE2	bmi.group	LIHC	Tumor	level1-level2	4.8786	5.2364	0.756964	0.99999	-0.357807	Tukey HSD test with ANOVA fit
ACE2	bmi.group	LUAD	Normal	NA	NA	NA	NA	NA	NA	Tukey HSD test with ANOVA fit
ACE2	bmi.group	LUAD	Tumor	NA	NA	NA	NA	NA	NA	Tukey HSD test with ANOVA fit
ACE2	bmi.group	LUSC	Normal	NA	NA	NA	NA	NA	NA	Tukey HSD test with ANOVA fit
ACE2	bmi.group	LUSC	Tumor	NA	NA	NA	NA	NA	NA	Tukey HSD test with ANOVA fit
ACE2	bmi.group	MESO	Normal	NA	NA	NA	NA	NA	NA	Tukey HSD test with ANOVA fit
ACE2	bmi.group	MESO	Tumor	NA	NA	NA	NA	NA	NA	Tukey HSD test with ANOVA fit
ACE2	bmi.group	OV	Normal	NA	NA	NA	NA	NA	NA	Tukey HSD test with ANOVA fit
ACE2	bmi.group	OV	Tumor	NA	NA	NA	NA	NA	NA	Tukey HSD test with ANOVA fit
ACE2	bmi.group	PAAD	Normal	NA	NA	NA	NA	NA	NA	Tukey HSD test with ANOVA fit
ACE2	bmi.group	PAAD	Tumor	NA	NA	NA	NA	NA	NA	Tukey HSD test with ANOVA fit
ACE2	bmi.group	PCPG	Normal	NA	NA	NA	NA	NA	NA	Tukey HSD test with ANOVA fit
ACE2	bmi.group	PCPG	Tumor	NA	NA	NA	NA	NA	NA	Tukey HSD test with ANOVA fit
ACE2	bmi.group	PRAD	Normal	NA	NA	NA	NA	NA	NA	Tukey HSD test with ANOVA fit
ACE2	bmi.group	PRAD	Tumor	NA	NA	NA	NA	NA	NA	Tukey HSD test with ANOVA fit
ACE2	bmi.group	READ	Normal	NA	NA	NA	NA	NA	NA	Tukey HSD test with ANOVA fit
ACE2	bmi.group	READ	Tumor	NA	NA	NA	NA	NA	NA	Tukey HSD test with ANOVA fit
ACE2	bmi.group	SARC	Normal	NA	NA	NA	NA	NA	NA	Tukey HSD test with ANOVA fit
ACE2	bmi.group	SARC	Tumor	NA	NA	NA	NA	NA	NA	Tukey HSD test with ANOVA fit
ACE2	bmi.group	SKCMmets	Normal	NA	NA	NA	NA	NA	NA	Tukey HSD test with ANOVA fit
ACE2	bmi.group	SKCMmets	Tumor	level3-level4	2.11052	2.0774	0.998186	0.99999	0.0331241	Tukey HSD test with ANOVA fit
ACE2	bmi.group	SKCMmets	Tumor	level2-level4	2.22406	2.0774	0.852755	0.99999	0.146656	Tukey HSD test with ANOVA fit
ACE2	bmi.group	SKCMmets	Tumor	level1-level4	2.1799	2.0774	0.94629	0.99999	0.102498	Tukey HSD test with ANOVA fit
ACE2	bmi.group	SKCMmets	Tumor	level2-level3	2.22406	2.11052	0.868381	0.99999	0.113532	Tukey HSD test with ANOVA fit
ACE2	bmi.group	SKCMmets	Tumor	level1-level3	2.1799	2.11052	0.968374	0.99999	0.0693737	Tukey HSD test with ANOVA fit
ACE2	bmi.group	SKCMmets	Tumor	level1-level2	2.1799	2.22406	0.988892	0.99999	-0.0441584	Tukey HSD test with ANOVA fit
ACE2	bmi.group	SKCMprimary	Normal	NA	NA	NA	NA	NA	NA	Tukey HSD test with ANOVA fit
ACE2	bmi.group	SKCMprimary	Tumor	NA	NA	NA	NA	NA	NA	Tukey HSD test with ANOVA fit
ACE2	bmi.group	STAD	Normal	NA	NA	NA	NA	NA	NA	Tukey HSD test with ANOVA fit
ACE2	bmi.group	STAD	Tumor	NA	NA	NA	NA	NA	NA	Tukey HSD test with ANOVA fit
ACE2	bmi.group	TGCT	Normal	NA	NA	NA	NA	NA	NA	Tukey HSD test with ANOVA fit
ACE2	bmi.group	TGCT	Tumor	NA	NA	NA	NA	NA	NA	Tukey HSD test with ANOVA fit
ACE2	bmi.group	THCA	Normal	NA	NA	NA	NA	NA	NA	Tukey HSD test with ANOVA fit
ACE2	bmi.group	THCA	Tumor	NA	NA	NA	NA	NA	NA	Tukey HSD test with ANOVA fit
ACE2	bmi.group	THYM	Normal	NA	NA	NA	NA	NA	NA	Tukey HSD test with ANOVA fit
ACE2	bmi.group	THYM	Tumor	NA	NA	NA	NA	NA	NA	Tukey HSD test with ANOVA fit
ACE2	bmi.group	UCEC	Normal	NA	NA	NA	NA	NA	NA	Tukey HSD test with ANOVA fit
ACE2	bmi.group	UCEC	Tumor	level3-level4	4.72376	4.879	0.814066	0.99999	-0.155239	Tukey HSD test with ANOVA fit
ACE2	bmi.group	UCEC	Tumor	level2-level4	4.86937	4.879	0.999942	0.99999	-0.00962956	Tukey HSD test with ANOVA fit
ACE2	bmi.group	UCEC	Tumor	level1-level4	4.78081	4.879	0.951701	0.99999	-0.0981845	Tukey HSD test with ANOVA fit
ACE2	bmi.group	UCEC	Tumor	level2-level3	4.86937	4.72376	0.883655	0.99999	0.14561	Tukey HSD test with ANOVA fit
ACE2	bmi.group	UCEC	Tumor	level1-level3	4.78081	4.72376	0.992562	0.99999	0.0570546	Tukey HSD test with ANOVA fit
ACE2	bmi.group	UCEC	Tumor	level1-level2	4.78081	4.86937	0.973612	0.99999	-0.0885549	Tukey HSD test with ANOVA fit
ACE2	bmi.group	UCS	Normal	NA	NA	NA	NA	NA	NA	Tukey HSD test with ANOVA fit
ACE2	bmi.group	UCS	Tumor	NA	NA	NA	NA	NA	NA	Tukey HSD test with ANOVA fit
ACE2	bmi.group	UVM	Normal	NA	NA	NA	NA	NA	NA	Tukey HSD test with ANOVA fit
ACE2	bmi.group	UVM	Tumor	NA	NA	NA	NA	NA	NA	Tukey HSD test with ANOVA fit
TMPRSS2	bmi.group	ACC	Normal	NA	NA	NA	NA	NA	NA	Tukey HSD test with ANOVA fit
TMPRSS2	bmi.group	ACC	Tumor	NA	NA	NA	NA	NA	NA	Tukey HSD test with ANOVA fit
TMPRSS2	bmi.group	BLCA	Normal	NA	NA	NA	NA	NA	NA	Tukey HSD test with ANOVA fit
TMPRSS2	bmi.group	BLCA	Tumor	level3-level4	9.03201	8.84188	0.994273	0.99999	0.190131	Tukey HSD test with ANOVA fit
TMPRSS2	bmi.group	BLCA	Tumor	level2-level4	8.99004	8.84188	0.996149	0.99999	0.148164	Tukey HSD test with ANOVA fit
TMPRSS2	bmi.group	BLCA	Tumor	level1-level4	9.20171	8.84188	0.947118	0.99999	0.35983	Tukey HSD test with ANOVA fit
TMPRSS2	bmi.group	BLCA	Tumor	level2-level3	8.99004	9.03201	0.999834	0.99999	-0.0419668	Tukey HSD test with ANOVA fit
TMPRSS2	bmi.group	BLCA	Tumor	level1-level3	9.20171	9.03201	0.988543	0.99999	0.169699	Tukey HSD test with ANOVA fit
TMPRSS2	bmi.group	BLCA	Tumor	level1-level2	9.20171	8.99004	0.953449	0.99999	0.211666	Tukey HSD test with ANOVA fit
TMPRSS2	bmi.group	BRCA	Normal	NA	NA	NA	NA	NA	NA	Tukey HSD test with ANOVA fit
TMPRSS2	bmi.group	BRCA	Tumor	NA	NA	NA	NA	NA	NA	Tukey HSD test with ANOVA fit
TMPRSS2	bmi.group	CESC	Normal	NA	NA	NA	NA	NA	NA	Tukey HSD test with ANOVA fit
TMPRSS2	bmi.group	CESC	Tumor	level3-level4	7.45412	7.8633	0.865655	0.99999	-0.40918	Tukey HSD test with ANOVA fit
TMPRSS2	bmi.group	CESC	Tumor	level2-level4	8.50941	7.8633	0.523554	0.99999	0.646114	Tukey HSD test with ANOVA fit
TMPRSS2	bmi.group	CESC	Tumor	level1-level4	8.09445	7.8633	0.955764	0.99999	0.23115	Tukey HSD test with ANOVA fit
TMPRSS2	bmi.group	CESC	Tumor	level2-level3	8.50941	7.45412	0.1104	0.99999	1.05529	Tukey HSD test with ANOVA fit
TMPRSS2	bmi.group	CESC	Tumor	level1-level3	8.09445	7.45412	0.471622	0.99999	0.64033	Tukey HSD test with ANOVA fit
TMPRSS2	bmi.group	CESC	Tumor	level1-level2	8.09445	8.50941	0.688902	0.99999	-0.414964	Tukey HSD test with ANOVA fit
TMPRSS2	bmi.group	CHOL	Normal	NA	NA	NA	NA	NA	NA	Tukey HSD test with ANOVA fit
TMPRSS2	bmi.group	CHOL	Tumor	NA	NA	NA	NA	NA	NA	Tukey HSD test with ANOVA fit
TMPRSS2	bmi.group	COAD	Normal	NA	NA	NA	NA	NA	NA	Tukey HSD test with ANOVA fit
TMPRSS2	bmi.group	COAD	Tumor	level3-level4	11.8187	11.6754	0.851488	0.99999	0.143353	Tukey HSD test with ANOVA fit
TMPRSS2	bmi.group	COAD	Tumor	level2-level4	11.7679	11.6754	0.931043	0.99999	0.0925202	Tukey HSD test with ANOVA fit
TMPRSS2	bmi.group	COAD	Tumor	level1-level4	11.7484	11.6754	0.96474	0.99999	0.0730148	Tukey HSD test with ANOVA fit
TMPRSS2	bmi.group	COAD	Tumor	level2-level3	11.7679	11.8187	0.986734	0.99999	-0.0508329	Tukey HSD test with ANOVA fit
TMPRSS2	bmi.group	COAD	Tumor	level1-level3	11.7484	11.8187	0.96659	0.99999	-0.0703382	Tukey HSD test with ANOVA fit
TMPRSS2	bmi.group	COAD	Tumor	level1-level2	11.7484	11.7679	0.998529	0.99999	-0.0195053	Tukey HSD test with ANOVA fit
TMPRSS2	bmi.group	DLBC	Normal	NA	NA	NA	NA	NA	NA	Tukey HSD test with ANOVA fit
TMPRSS2	bmi.group	DLBC	Tumor	NA	NA	NA	NA	NA	NA	Tukey HSD test with ANOVA fit
TMPRSS2	bmi.group	ESCA	Normal	NA	NA	NA	NA	NA	NA	Tukey HSD test with ANOVA fit
TMPRSS2	bmi.group	ESCA	Tumor	NA	NA	NA	NA	NA	NA	Tukey HSD test with ANOVA fit
TMPRSS2	bmi.group	GBM	Normal	NA	NA	NA	NA	NA	NA	Tukey HSD test with ANOVA fit
TMPRSS2	bmi.group	GBM	Tumor	NA	NA	NA	NA	NA	NA	Tukey HSD test with ANOVA fit
TMPRSS2	bmi.group	HNSC	Normal	NA	NA	NA	NA	NA	NA	Tukey HSD test with ANOVA fit
TMPRSS2	bmi.group	HNSC	Tumor	NA	NA	NA	NA	NA	NA	Tukey HSD test with ANOVA fit
TMPRSS2	bmi.group	KICH	Normal	NA	NA	NA	NA	NA	NA	Tukey HSD test with ANOVA fit
TMPRSS2	bmi.group	KICH	Tumor	NA	NA	NA	NA	NA	NA	Tukey HSD test with ANOVA fit
TMPRSS2	bmi.group	KIRC	Normal	NA	NA	NA	NA	NA	NA	Tukey HSD test with ANOVA fit
TMPRSS2	bmi.group	KIRC	Tumor	NA	NA	NA	NA	NA	NA	Tukey HSD test with ANOVA fit
TMPRSS2	bmi.group	KIRP	Normal	NA	NA	NA	NA	NA	NA	Tukey HSD test with ANOVA fit
TMPRSS2	bmi.group	KIRP	Tumor	level3-level4	5.91495	6.28447	0.859982	0.99999	-0.369518	Tukey HSD test with ANOVA fit
TMPRSS2	bmi.group	KIRP	Tumor	level2-level4	5.86409	6.28447	0.73287	0.99999	-0.420387	Tukey HSD test with ANOVA fit
TMPRSS2	bmi.group	KIRP	Tumor	level1-level4	5.94981	6.28447	0.878727	0.99999	-0.334666	Tukey HSD test with ANOVA fit
TMPRSS2	bmi.group	KIRP	Tumor	level2-level3	5.86409	5.91495	0.999186	0.99999	-0.0508685	Tukey HSD test with ANOVA fit
TMPRSS2	bmi.group	KIRP	Tumor	level1-level3	5.94981	5.91495	0.999808	0.99999	0.034852	Tukey HSD test with ANOVA fit
TMPRSS2	bmi.group	KIRP	Tumor	level1-level2	5.94981	5.86409	0.995334	0.99999	0.0857205	Tukey HSD test with ANOVA fit
TMPRSS2	bmi.group	LAML	Normal	NA	NA	NA	NA	NA	NA	Tukey HSD test with ANOVA fit
TMPRSS2	bmi.group	LAML	Tumor	NA	NA	NA	NA	NA	NA	Tukey HSD test with ANOVA fit
TMPRSS2	bmi.group	LGG	Normal	NA	NA	NA	NA	NA	NA	Tukey HSD test with ANOVA fit
TMPRSS2	bmi.group	LGG	Tumor	NA	NA	NA	NA	NA	NA	Tukey HSD test with ANOVA fit
TMPRSS2	bmi.group	LIHC	Normal	NA	NA	NA	NA	NA	NA	Tukey HSD test with ANOVA fit
TMPRSS2	bmi.group	LIHC	Tumor	level3-level4	9.68443	9.76758	0.995953	0.99999	-0.0831484	Tukey HSD test with ANOVA fit
TMPRSS2	bmi.group	LIHC	Tumor	level2-level4	9.49204	9.76758	0.818559	0.99999	-0.275546	Tukey HSD test with ANOVA fit
TMPRSS2	bmi.group	LIHC	Tumor	level1-level4	9.36835	9.76758	0.529377	0.99999	-0.399234	Tukey HSD test with ANOVA fit
TMPRSS2	bmi.group	LIHC	Tumor	level2-level3	9.49204	9.68443	0.915357	0.99999	-0.192398	Tukey HSD test with ANOVA fit
TMPRSS2	bmi.group	LIHC	Tumor	level1-level3	9.36835	9.68443	0.656011	0.99999	-0.316086	Tukey HSD test with ANOVA fit
TMPRSS2	bmi.group	LIHC	Tumor	level1-level2	9.36835	9.49204	0.922094	0.99999	-0.123688	Tukey HSD test with ANOVA fit
TMPRSS2	bmi.group	LUAD	Normal	NA	NA	NA	NA	NA	NA	Tukey HSD test with ANOVA fit
TMPRSS2	bmi.group	LUAD	Tumor	NA	NA	NA	NA	NA	NA	Tukey HSD test with ANOVA fit
TMPRSS2	bmi.group	LUSC	Normal	NA	NA	NA	NA	NA	NA	Tukey HSD test with ANOVA fit
TMPRSS2	bmi.group	LUSC	Tumor	NA	NA	NA	NA	NA	NA	Tukey HSD test with ANOVA fit
TMPRSS2	bmi.group	MESO	Normal	NA	NA	NA	NA	NA	NA	Tukey HSD test with ANOVA fit
TMPRSS2	bmi.group	MESO	Tumor	NA	NA	NA	NA	NA	NA	Tukey HSD test with ANOVA fit
TMPRSS2	bmi.group	OV	Normal	NA	NA	NA	NA	NA	NA	Tukey HSD test with ANOVA fit
TMPRSS2	bmi.group	OV	Tumor	NA	NA	NA	NA	NA	NA	Tukey HSD test with ANOVA fit
TMPRSS2	bmi.group	PAAD	Normal	NA	NA	NA	NA	NA	NA	Tukey HSD test with ANOVA fit
TMPRSS2	bmi.group	PAAD	Tumor	NA	NA	NA	NA	NA	NA	Tukey HSD test with ANOVA fit
TMPRSS2	bmi.group	PCPG	Normal	NA	NA	NA	NA	NA	NA	Tukey HSD test with ANOVA fit
TMPRSS2	bmi.group	PCPG	Tumor	NA	NA	NA	NA	NA	NA	Tukey HSD test with ANOVA fit
TMPRSS2	bmi.group	PRAD	Normal	NA	NA	NA	NA	NA	NA	Tukey HSD test with ANOVA fit
TMPRSS2	bmi.group	PRAD	Tumor	NA	NA	NA	NA	NA	NA	Tukey HSD test with ANOVA fit
TMPRSS2	bmi.group	READ	Normal	NA	NA	NA	NA	NA	NA	Tukey HSD test with ANOVA fit
TMPRSS2	bmi.group	READ	Tumor	NA	NA	NA	NA	NA	NA	Tukey HSD test with ANOVA fit
TMPRSS2	bmi.group	SARC	Normal	NA	NA	NA	NA	NA	NA	Tukey HSD test with ANOVA fit
TMPRSS2	bmi.group	SARC	Tumor	NA	NA	NA	NA	NA	NA	Tukey HSD test with ANOVA fit
TMPRSS2	bmi.group	SKCMmets	Normal	NA	NA	NA	NA	NA	NA	Tukey HSD test with ANOVA fit
TMPRSS2	bmi.group	SKCMmets	Tumor	level3-level4	3.98551	3.77721	0.974086	0.99999	0.208297	Tukey HSD test with ANOVA fit
TMPRSS2	bmi.group	SKCMmets	Tumor	level2-level4	4.17788	3.77721	0.823743	0.99999	0.40067	Tukey HSD test with ANOVA fit
TMPRSS2	bmi.group	SKCMmets	Tumor	level1-level4	3.62247	3.77721	0.987897	0.99999	-0.154737	Tukey HSD test with ANOVA fit
TMPRSS2	bmi.group	SKCMmets	Tumor	level2-level3	4.17788	3.98551	0.956033	0.99999	0.192374	Tukey HSD test with ANOVA fit
TMPRSS2	bmi.group	SKCMmets	Tumor	level1-level3	3.62247	3.98551	0.784168	0.99999	-0.363034	Tukey HSD test with ANOVA fit
TMPRSS2	bmi.group	SKCMmets	Tumor	level1-level2	3.62247	4.17788	0.398649	0.99999	-0.555407	Tukey HSD test with ANOVA fit
TMPRSS2	bmi.group	SKCMprimary	Normal	NA	NA	NA	NA	NA	NA	Tukey HSD test with ANOVA fit
TMPRSS2	bmi.group	SKCMprimary	Tumor	NA	NA	NA	NA	NA	NA	Tukey HSD test with ANOVA fit
TMPRSS2	bmi.group	STAD	Normal	NA	NA	NA	NA	NA	NA	Tukey HSD test with ANOVA fit
TMPRSS2	bmi.group	STAD	Tumor	NA	NA	NA	NA	NA	NA	Tukey HSD test with ANOVA fit
TMPRSS2	bmi.group	TGCT	Normal	NA	NA	NA	NA	NA	NA	Tukey HSD test with ANOVA fit
TMPRSS2	bmi.group	TGCT	Tumor	NA	NA	NA	NA	NA	NA	Tukey HSD test with ANOVA fit
TMPRSS2	bmi.group	THCA	Normal	NA	NA	NA	NA	NA	NA	Tukey HSD test with ANOVA fit
TMPRSS2	bmi.group	THCA	Tumor	NA	NA	NA	NA	NA	NA	Tukey HSD test with ANOVA fit
TMPRSS2	bmi.group	THYM	Normal	NA	NA	NA	NA	NA	NA	Tukey HSD test with ANOVA fit
TMPRSS2	bmi.group	THYM	Tumor	NA	NA	NA	NA	NA	NA	Tukey HSD test with ANOVA fit
TMPRSS2	bmi.group	UCEC	Normal	NA	NA	NA	NA	NA	NA	Tukey HSD test with ANOVA fit
TMPRSS2	bmi.group	UCEC	Tumor	level3-level4	8.84671	8.95052	0.962411	0.99999	-0.103809	Tukey HSD test with ANOVA fit
TMPRSS2	bmi.group	UCEC	Tumor	level2-level4	8.83742	8.95052	0.952945	0.99999	-0.113097	Tukey HSD test with ANOVA fit
TMPRSS2	bmi.group	UCEC	Tumor	level1-level4	8.73093	8.95052	0.763808	0.99999	-0.219586	Tukey HSD test with ANOVA fit
TMPRSS2	bmi.group	UCEC	Tumor	level2-level3	8.83742	8.84671	0.99998	0.99999	-0.00928772	Tukey HSD test with ANOVA fit
TMPRSS2	bmi.group	UCEC	Tumor	level1-level3	8.73093	8.84671	0.96719	0.99999	-0.115776	Tukey HSD test with ANOVA fit
TMPRSS2	bmi.group	UCEC	Tumor	level1-level2	8.73093	8.83742	0.974469	0.99999	-0.106489	Tukey HSD test with ANOVA fit
TMPRSS2	bmi.group	UCS	Normal	NA	NA	NA	NA	NA	NA	Tukey HSD test with ANOVA fit
TMPRSS2	bmi.group	UCS	Tumor	NA	NA	NA	NA	NA	NA	Tukey HSD test with ANOVA fit
TMPRSS2	bmi.group	UVM	Normal	NA	NA	NA	NA	NA	NA	Tukey HSD test with ANOVA fit
TMPRSS2	bmi.group	UVM	Tumor	NA	NA	NA	NA	NA	NA	Tukey HSD test with ANOVA fit
ACE2	smoking.group	ACC	Normal	NA	NA	NA	NA	NA	NA	Tukey HSD test with ANOVA fit
ACE2	smoking.group	ACC	Tumor	NA	NA	NA	NA	NA	NA	Tukey HSD test with ANOVA fit
ACE2	smoking.group	BLCA	Normal	NA	NA	NA	NA	NA	NA	Tukey HSD test with ANOVA fit
ACE2	smoking.group	BLCA	Tumor	light-heavy	4.5803	4.78673	0.749653	0.999304	-0.206428	Tukey HSD test with ANOVA fit
ACE2	smoking.group	BLCA	Tumor	never-heavy	5.13361	4.78673	0.360455	0.999304	0.346888	Tukey HSD test with ANOVA fit
ACE2	smoking.group	BLCA	Tumor	never-light	5.13361	4.5803	0.159946	0.977045	0.553315	Tukey HSD test with ANOVA fit
ACE2	smoking.group	BRCA	Normal	NA	NA	NA	NA	NA	NA	Tukey HSD test with ANOVA fit
ACE2	smoking.group	BRCA	Tumor	NA	NA	NA	NA	NA	NA	Tukey HSD test with ANOVA fit
ACE2	smoking.group	CESC	Normal	NA	NA	NA	NA	NA	NA	Tukey HSD test with ANOVA fit
ACE2	smoking.group	CESC	Tumor	light-heavy	5.77363	6.08201	0.719995	0.999304	-0.308384	Tukey HSD test with ANOVA fit
ACE2	smoking.group	CESC	Tumor	never-heavy	5.96085	6.08201	0.940936	0.999304	-0.121166	Tukey HSD test with ANOVA fit
ACE2	smoking.group	CESC	Tumor	never-light	5.96085	5.77363	0.757908	0.999304	0.187218	Tukey HSD test with ANOVA fit
ACE2	smoking.group	CHOL	Normal	NA	NA	NA	NA	NA	NA	Tukey HSD test with ANOVA fit
ACE2	smoking.group	CHOL	Tumor	NA	NA	NA	NA	NA	NA	Tukey HSD test with ANOVA fit
ACE2	smoking.group	COAD	Normal	NA	NA	NA	NA	NA	NA	Tukey HSD test with ANOVA fit
ACE2	smoking.group	COAD	Tumor	NA	NA	NA	NA	NA	NA	Tukey HSD test with ANOVA fit
ACE2	smoking.group	DLBC	Normal	NA	NA	NA	NA	NA	NA	Tukey HSD test with ANOVA fit
ACE2	smoking.group	DLBC	Tumor	NA	NA	NA	NA	NA	NA	Tukey HSD test with ANOVA fit
ACE2	smoking.group	ESCA	Normal	NA	NA	NA	NA	NA	NA	Tukey HSD test with ANOVA fit
ACE2	smoking.group	ESCA	Tumor	light-heavy	6.80315	6.22988	0.448824	0.999304	0.57327	Tukey HSD test with ANOVA fit
ACE2	smoking.group	ESCA	Tumor	never-heavy	5.96121	6.22988	0.789087	0.999304	-0.268668	Tukey HSD test with ANOVA fit
ACE2	smoking.group	ESCA	Tumor	never-light	5.96121	6.80315	0.200458	0.977045	-0.841938	Tukey HSD test with ANOVA fit
ACE2	smoking.group	GBM	Normal	NA	NA	NA	NA	NA	NA	Tukey HSD test with ANOVA fit
ACE2	smoking.group	GBM	Tumor	NA	NA	NA	NA	NA	NA	Tukey HSD test with ANOVA fit
ACE2	smoking.group	HNSC	Normal	NA	NA	NA	NA	NA	NA	Tukey HSD test with ANOVA fit
ACE2	smoking.group	HNSC	Tumor	light-heavy	6.05721	6.26702	0.641456	0.999304	-0.209803	Tukey HSD test with ANOVA fit
ACE2	smoking.group	HNSC	Tumor	never-heavy	6.14311	6.26702	0.78116	0.999304	-0.123906	Tukey HSD test with ANOVA fit
ACE2	smoking.group	HNSC	Tumor	never-light	6.14311	6.05721	0.940522	0.999304	0.0858969	Tukey HSD test with ANOVA fit
ACE2	smoking.group	KICH	Normal	NA	NA	NA	NA	NA	NA	Tukey HSD test with ANOVA fit
ACE2	smoking.group	KICH	Tumor	NA	NA	NA	NA	NA	NA	Tukey HSD test with ANOVA fit
ACE2	smoking.group	KIRC	Normal	NA	NA	NA	NA	NA	NA	Tukey HSD test with ANOVA fit
ACE2	smoking.group	KIRC	Tumor	NA	NA	NA	NA	NA	NA	Tukey HSD test with ANOVA fit
ACE2	smoking.group	KIRP	Normal	NA	NA	NA	NA	NA	NA	Tukey HSD test with ANOVA fit
ACE2	smoking.group	KIRP	Tumor	light-heavy	11.2797	10.5608	0.385949	0.999304	0.718911	Tukey HSD test with ANOVA fit
ACE2	smoking.group	KIRP	Tumor	never-heavy	10.5391	10.5608	0.99855	0.999304	-0.0217094	Tukey HSD test with ANOVA fit
ACE2	smoking.group	KIRP	Tumor	never-light	10.5391	11.2797	0.243199	0.999304	-0.74062	Tukey HSD test with ANOVA fit
ACE2	smoking.group	LAML	Normal	NA	NA	NA	NA	NA	NA	Tukey HSD test with ANOVA fit
ACE2	smoking.group	LAML	Tumor	NA	NA	NA	NA	NA	NA	Tukey HSD test with ANOVA fit
ACE2	smoking.group	LGG	Normal	NA	NA	NA	NA	NA	NA	Tukey HSD test with ANOVA fit
ACE2	smoking.group	LGG	Tumor	NA	NA	NA	NA	NA	NA	Tukey HSD test with ANOVA fit
ACE2	smoking.group	LIHC	Normal	NA	NA	NA	NA	NA	NA	Tukey HSD test with ANOVA fit
ACE2	smoking.group	LIHC	Tumor	NA	NA	NA	NA	NA	NA	Tukey HSD test with ANOVA fit
ACE2	smoking.group	LUAD	Normal	NA	NA	NA	NA	NA	NA	Tukey HSD test with ANOVA fit
ACE2	smoking.group	LUAD	Tumor	light-heavy	6.25289	6.36986	0.875841	0.999304	-0.116974	Tukey HSD test with ANOVA fit
ACE2	smoking.group	LUAD	Tumor	never-heavy	6.91978	6.36986	0.0780089	0.748885	0.549918	Tukey HSD test with ANOVA fit
ACE2	smoking.group	LUAD	Tumor	never-light	6.91978	6.25289	0.0744997	0.748885	0.666891	Tukey HSD test with ANOVA fit
ACE2	smoking.group	LUSC	Normal	NA	NA	NA	NA	NA	NA	Tukey HSD test with ANOVA fit
ACE2	smoking.group	LUSC	Tumor	light-heavy	5.81402	5.99749	0.775092	0.999304	-0.18347	Tukey HSD test with ANOVA fit
ACE2	smoking.group	LUSC	Tumor	never-heavy	5.43271	5.99749	0.358234	0.999304	-0.564773	Tukey HSD test with ANOVA fit
ACE2	smoking.group	LUSC	Tumor	never-light	5.43271	5.81402	0.703605	0.999304	-0.381304	Tukey HSD test with ANOVA fit
ACE2	smoking.group	MESO	Normal	NA	NA	NA	NA	NA	NA	Tukey HSD test with ANOVA fit
ACE2	smoking.group	MESO	Tumor	NA	NA	NA	NA	NA	NA	Tukey HSD test with ANOVA fit
ACE2	smoking.group	OV	Normal	NA	NA	NA	NA	NA	NA	Tukey HSD test with ANOVA fit
ACE2	smoking.group	OV	Tumor	NA	NA	NA	NA	NA	NA	Tukey HSD test with ANOVA fit
ACE2	smoking.group	PAAD	Normal	NA	NA	NA	NA	NA	NA	Tukey HSD test with ANOVA fit
ACE2	smoking.group	PAAD	Tumor	light-heavy	7.47579	7.66971	0.925597	0.999304	-0.19392	Tukey HSD test with ANOVA fit
ACE2	smoking.group	PAAD	Tumor	never-heavy	6.62484	7.66971	0.0334412	0.748885	-1.04487	Tukey HSD test with ANOVA fit
ACE2	smoking.group	PAAD	Tumor	never-light	6.62484	7.47579	0.15907	0.977045	-0.85095	Tukey HSD test with ANOVA fit
ACE2	smoking.group	PCPG	Normal	NA	NA	NA	NA	NA	NA	Tukey HSD test with ANOVA fit
ACE2	smoking.group	PCPG	Tumor	NA	NA	NA	NA	NA	NA	Tukey HSD test with ANOVA fit
ACE2	smoking.group	PRAD	Normal	NA	NA	NA	NA	NA	NA	Tukey HSD test with ANOVA fit
ACE2	smoking.group	PRAD	Tumor	NA	NA	NA	NA	NA	NA	Tukey HSD test with ANOVA fit
ACE2	smoking.group	READ	Normal	NA	NA	NA	NA	NA	NA	Tukey HSD test with ANOVA fit
ACE2	smoking.group	READ	Tumor	NA	NA	NA	NA	NA	NA	Tukey HSD test with ANOVA fit
ACE2	smoking.group	SARC	Normal	NA	NA	NA	NA	NA	NA	Tukey HSD test with ANOVA fit
ACE2	smoking.group	SARC	Tumor	NA	NA	NA	NA	NA	NA	Tukey HSD test with ANOVA fit
ACE2	smoking.group	SKCMmets	Normal	NA	NA	NA	NA	NA	NA	Tukey HSD test with ANOVA fit
ACE2	smoking.group	SKCMmets	Tumor	NA	NA	NA	NA	NA	NA	Tukey HSD test with ANOVA fit
ACE2	smoking.group	SKCMprimary	Normal	NA	NA	NA	NA	NA	NA	Tukey HSD test with ANOVA fit
ACE2	smoking.group	SKCMprimary	Tumor	NA	NA	NA	NA	NA	NA	Tukey HSD test with ANOVA fit
ACE2	smoking.group	STAD	Normal	NA	NA	NA	NA	NA	NA	Tukey HSD test with ANOVA fit
ACE2	smoking.group	STAD	Tumor	NA	NA	NA	NA	NA	NA	Tukey HSD test with ANOVA fit
ACE2	smoking.group	TGCT	Normal	NA	NA	NA	NA	NA	NA	Tukey HSD test with ANOVA fit
ACE2	smoking.group	TGCT	Tumor	NA	NA	NA	NA	NA	NA	Tukey HSD test with ANOVA fit
ACE2	smoking.group	THCA	Normal	NA	NA	NA	NA	NA	NA	Tukey HSD test with ANOVA fit
ACE2	smoking.group	THCA	Tumor	NA	NA	NA	NA	NA	NA	Tukey HSD test with ANOVA fit
ACE2	smoking.group	THYM	Normal	NA	NA	NA	NA	NA	NA	Tukey HSD test with ANOVA fit
ACE2	smoking.group	THYM	Tumor	NA	NA	NA	NA	NA	NA	Tukey HSD test with ANOVA fit
ACE2	smoking.group	UCEC	Normal	NA	NA	NA	NA	NA	NA	Tukey HSD test with ANOVA fit
ACE2	smoking.group	UCEC	Tumor	NA	NA	NA	NA	NA	NA	Tukey HSD test with ANOVA fit
ACE2	smoking.group	UCS	Normal	NA	NA	NA	NA	NA	NA	Tukey HSD test with ANOVA fit
ACE2	smoking.group	UCS	Tumor	NA	NA	NA	NA	NA	NA	Tukey HSD test with ANOVA fit
ACE2	smoking.group	UVM	Normal	NA	NA	NA	NA	NA	NA	Tukey HSD test with ANOVA fit
ACE2	smoking.group	UVM	Tumor	NA	NA	NA	NA	NA	NA	Tukey HSD test with ANOVA fit
TMPRSS2	smoking.group	ACC	Normal	NA	NA	NA	NA	NA	NA	Tukey HSD test with ANOVA fit
TMPRSS2	smoking.group	ACC	Tumor	NA	NA	NA	NA	NA	NA	Tukey HSD test with ANOVA fit
TMPRSS2	smoking.group	BLCA	Normal	NA	NA	NA	NA	NA	NA	Tukey HSD test with ANOVA fit
TMPRSS2	smoking.group	BLCA	Tumor	light-heavy	9.18152	8.59156	0.42399	0.999304	0.58996	Tukey HSD test with ANOVA fit
TMPRSS2	smoking.group	BLCA	Tumor	never-heavy	9.56854	8.59156	0.0536424	0.748885	0.976977	Tukey HSD test with ANOVA fit
TMPRSS2	smoking.group	BLCA	Tumor	never-light	9.56854	9.18152	0.717822	0.999304	0.387017	Tukey HSD test with ANOVA fit
TMPRSS2	smoking.group	BRCA	Normal	NA	NA	NA	NA	NA	NA	Tukey HSD test with ANOVA fit
TMPRSS2	smoking.group	BRCA	Tumor	NA	NA	NA	NA	NA	NA	Tukey HSD test with ANOVA fit
TMPRSS2	smoking.group	CESC	Normal	NA	NA	NA	NA	NA	NA	Tukey HSD test with ANOVA fit
TMPRSS2	smoking.group	CESC	Tumor	light-heavy	8.1107	8.81274	0.417706	0.999304	-0.702043	Tukey HSD test with ANOVA fit
TMPRSS2	smoking.group	CESC	Tumor	never-heavy	8.05755	8.81274	0.299149	0.999304	-0.755193	Tukey HSD test with ANOVA fit
TMPRSS2	smoking.group	CESC	Tumor	never-light	8.05755	8.1107	0.988536	0.999304	-0.0531501	Tukey HSD test with ANOVA fit
TMPRSS2	smoking.group	CHOL	Normal	NA	NA	NA	NA	NA	NA	Tukey HSD test with ANOVA fit
TMPRSS2	smoking.group	CHOL	Tumor	NA	NA	NA	NA	NA	NA	Tukey HSD test with ANOVA fit
TMPRSS2	smoking.group	COAD	Normal	NA	NA	NA	NA	NA	NA	Tukey HSD test with ANOVA fit
TMPRSS2	smoking.group	COAD	Tumor	NA	NA	NA	NA	NA	NA	Tukey HSD test with ANOVA fit
TMPRSS2	smoking.group	DLBC	Normal	NA	NA	NA	NA	NA	NA	Tukey HSD test with ANOVA fit
TMPRSS2	smoking.group	DLBC	Tumor	NA	NA	NA	NA	NA	NA	Tukey HSD test with ANOVA fit
TMPRSS2	smoking.group	ESCA	Normal	NA	NA	NA	NA	NA	NA	Tukey HSD test with ANOVA fit
TMPRSS2	smoking.group	ESCA	Tumor	light-heavy	8.28104	8.90953	0.691481	0.999304	-0.628486	Tukey HSD test with ANOVA fit
TMPRSS2	smoking.group	ESCA	Tumor	never-heavy	8.51975	8.90953	0.826817	0.999304	-0.389774	Tukey HSD test with ANOVA fit
TMPRSS2	smoking.group	ESCA	Tumor	never-light	8.51975	8.28104	0.951093	0.999304	0.238712	Tukey HSD test with ANOVA fit
TMPRSS2	smoking.group	GBM	Normal	NA	NA	NA	NA	NA	NA	Tukey HSD test with ANOVA fit
TMPRSS2	smoking.group	GBM	Tumor	NA	NA	NA	NA	NA	NA	Tukey HSD test with ANOVA fit
TMPRSS2	smoking.group	HNSC	Normal	NA	NA	NA	NA	NA	NA	Tukey HSD test with ANOVA fit
TMPRSS2	smoking.group	HNSC	Tumor	light-heavy	6.28382	6.23197	0.990913	0.999304	0.0518502	Tukey HSD test with ANOVA fit
TMPRSS2	smoking.group	HNSC	Tumor	never-heavy	5.68674	6.23197	0.203551	0.977045	-0.545226	Tukey HSD test with ANOVA fit
TMPRSS2	smoking.group	HNSC	Tumor	never-light	5.68674	6.28382	0.372036	0.999304	-0.597076	Tukey HSD test with ANOVA fit
TMPRSS2	smoking.group	KICH	Normal	NA	NA	NA	NA	NA	NA	Tukey HSD test with ANOVA fit
TMPRSS2	smoking.group	KICH	Tumor	NA	NA	NA	NA	NA	NA	Tukey HSD test with ANOVA fit
TMPRSS2	smoking.group	KIRC	Normal	NA	NA	NA	NA	NA	NA	Tukey HSD test with ANOVA fit
TMPRSS2	smoking.group	KIRC	Tumor	NA	NA	NA	NA	NA	NA	Tukey HSD test with ANOVA fit
TMPRSS2	smoking.group	KIRP	Normal	NA	NA	NA	NA	NA	NA	Tukey HSD test with ANOVA fit
TMPRSS2	smoking.group	KIRP	Tumor	light-heavy	6.18339	5.73804	0.57063	0.999304	0.445357	Tukey HSD test with ANOVA fit
TMPRSS2	smoking.group	KIRP	Tumor	never-heavy	5.76532	5.73804	0.9965	0.999304	0.0272841	Tukey HSD test with ANOVA fit
TMPRSS2	smoking.group	KIRP	Tumor	never-light	5.76532	6.18339	0.499657	0.999304	-0.418073	Tukey HSD test with ANOVA fit
TMPRSS2	smoking.group	LAML	Normal	NA	NA	NA	NA	NA	NA	Tukey HSD test with ANOVA fit
TMPRSS2	smoking.group	LAML	Tumor	NA	NA	NA	NA	NA	NA	Tukey HSD test with ANOVA fit
TMPRSS2	smoking.group	LGG	Normal	NA	NA	NA	NA	NA	NA	Tukey HSD test with ANOVA fit
TMPRSS2	smoking.group	LGG	Tumor	NA	NA	NA	NA	NA	NA	Tukey HSD test with ANOVA fit
TMPRSS2	smoking.group	LIHC	Normal	NA	NA	NA	NA	NA	NA	Tukey HSD test with ANOVA fit
TMPRSS2	smoking.group	LIHC	Tumor	NA	NA	NA	NA	NA	NA	Tukey HSD test with ANOVA fit
TMPRSS2	smoking.group	LUAD	Normal	NA	NA	NA	NA	NA	NA	Tukey HSD test with ANOVA fit
TMPRSS2	smoking.group	LUAD	Tumor	light-heavy	10.732	10.4221	0.28482	0.999304	0.309906	Tukey HSD test with ANOVA fit
TMPRSS2	smoking.group	LUAD	Tumor	never-heavy	11.0996	10.4221	0.00559726	0.268668	0.677544	Tukey HSD test with ANOVA fit
TMPRSS2	smoking.group	LUAD	Tumor	never-light	11.0996	10.732	0.338847	0.999304	0.367638	Tukey HSD test with ANOVA fit
TMPRSS2	smoking.group	LUSC	Normal	NA	NA	NA	NA	NA	NA	Tukey HSD test with ANOVA fit
TMPRSS2	smoking.group	LUSC	Tumor	light-heavy	8.1014	8.00982	0.956096	0.999304	0.0915734	Tukey HSD test with ANOVA fit
TMPRSS2	smoking.group	LUSC	Tumor	never-heavy	8.08124	8.00982	0.988401	0.999304	0.0714128	Tukey HSD test with ANOVA fit
TMPRSS2	smoking.group	LUSC	Tumor	never-light	8.08124	8.1014	0.999304	0.999304	-0.0201607	Tukey HSD test with ANOVA fit
TMPRSS2	smoking.group	MESO	Normal	NA	NA	NA	NA	NA	NA	Tukey HSD test with ANOVA fit
TMPRSS2	smoking.group	MESO	Tumor	NA	NA	NA	NA	NA	NA	Tukey HSD test with ANOVA fit
TMPRSS2	smoking.group	OV	Normal	NA	NA	NA	NA	NA	NA	Tukey HSD test with ANOVA fit
TMPRSS2	smoking.group	OV	Tumor	NA	NA	NA	NA	NA	NA	Tukey HSD test with ANOVA fit
TMPRSS2	smoking.group	PAAD	Normal	NA	NA	NA	NA	NA	NA	Tukey HSD test with ANOVA fit
TMPRSS2	smoking.group	PAAD	Tumor	light-heavy	10.6054	10.7835	0.913049	0.999304	-0.178116	Tukey HSD test with ANOVA fit
TMPRSS2	smoking.group	PAAD	Tumor	never-heavy	10.1761	10.7835	0.194925	0.977045	-0.607349	Tukey HSD test with ANOVA fit
TMPRSS2	smoking.group	PAAD	Tumor	never-light	10.1761	10.6054	0.515934	0.999304	-0.429233	Tukey HSD test with ANOVA fit
TMPRSS2	smoking.group	PCPG	Normal	NA	NA	NA	NA	NA	NA	Tukey HSD test with ANOVA fit
TMPRSS2	smoking.group	PCPG	Tumor	NA	NA	NA	NA	NA	NA	Tukey HSD test with ANOVA fit
TMPRSS2	smoking.group	PRAD	Normal	NA	NA	NA	NA	NA	NA	Tukey HSD test with ANOVA fit
TMPRSS2	smoking.group	PRAD	Tumor	NA	NA	NA	NA	NA	NA	Tukey HSD test with ANOVA fit
TMPRSS2	smoking.group	READ	Normal	NA	NA	NA	NA	NA	NA	Tukey HSD test with ANOVA fit
TMPRSS2	smoking.group	READ	Tumor	NA	NA	NA	NA	NA	NA	Tukey HSD test with ANOVA fit
TMPRSS2	smoking.group	SARC	Normal	NA	NA	NA	NA	NA	NA	Tukey HSD test with ANOVA fit
TMPRSS2	smoking.group	SARC	Tumor	NA	NA	NA	NA	NA	NA	Tukey HSD test with ANOVA fit
TMPRSS2	smoking.group	SKCMmets	Normal	NA	NA	NA	NA	NA	NA	Tukey HSD test with ANOVA fit
TMPRSS2	smoking.group	SKCMmets	Tumor	NA	NA	NA	NA	NA	NA	Tukey HSD test with ANOVA fit
TMPRSS2	smoking.group	SKCMprimary	Normal	NA	NA	NA	NA	NA	NA	Tukey HSD test with ANOVA fit
TMPRSS2	smoking.group	SKCMprimary	Tumor	NA	NA	NA	NA	NA	NA	Tukey HSD test with ANOVA fit
TMPRSS2	smoking.group	STAD	Normal	NA	NA	NA	NA	NA	NA	Tukey HSD test with ANOVA fit
TMPRSS2	smoking.group	STAD	Tumor	NA	NA	NA	NA	NA	NA	Tukey HSD test with ANOVA fit
TMPRSS2	smoking.group	TGCT	Normal	NA	NA	NA	NA	NA	NA	Tukey HSD test with ANOVA fit
TMPRSS2	smoking.group	TGCT	Tumor	NA	NA	NA	NA	NA	NA	Tukey HSD test with ANOVA fit
TMPRSS2	smoking.group	THCA	Normal	NA	NA	NA	NA	NA	NA	Tukey HSD test with ANOVA fit
TMPRSS2	smoking.group	THCA	Tumor	NA	NA	NA	NA	NA	NA	Tukey HSD test with ANOVA fit
TMPRSS2	smoking.group	THYM	Normal	NA	NA	NA	NA	NA	NA	Tukey HSD test with ANOVA fit
TMPRSS2	smoking.group	THYM	Tumor	NA	NA	NA	NA	NA	NA	Tukey HSD test with ANOVA fit
TMPRSS2	smoking.group	UCEC	Normal	NA	NA	NA	NA	NA	NA	Tukey HSD test with ANOVA fit
TMPRSS2	smoking.group	UCEC	Tumor	NA	NA	NA	NA	NA	NA	Tukey HSD test with ANOVA fit
TMPRSS2	smoking.group	UCS	Normal	NA	NA	NA	NA	NA	NA	Tukey HSD test with ANOVA fit
TMPRSS2	smoking.group	UCS	Tumor	NA	NA	NA	NA	NA	NA	Tukey HSD test with ANOVA fit
TMPRSS2	smoking.group	UVM	Normal	NA	NA	NA	NA	NA	NA	Tukey HSD test with ANOVA fit
TMPRSS2	smoking.group	UVM	Tumor	NA	NA	NA	NA	NA	NA	Tukey HSD test with ANOVA fit

## Sheet: TableS8
Signature name	Signature description	Genes	Reference	DOI
ISG	Interferon stimulated genes	ADAR,DDX60,HERC6,IRF7,OASL,PSME2,STAT2,TRIM25,BST2,DHX58,IFI35,ISG15,OGFR,RSAD2,TDRD7,UBE2L6,CASP1,EIF2AK2,IFIH1,ISG20,PARP12,RTP4,TRAFD1,USP18,CMPK2,EPSTI1,IFIT2,MX1,PARP14,SAMD9L,TRIM14,CXCL10,GBP4,IFIT3,NMI,PNPT1,SP110,TRIM21	Liu et al. 2019. Nat Med.	10.1038/s41591-018-0302-5
Tinfl	T cell-inflamed gene expression	HLA-DOB,ADORA3,AIF1,ALOX5AP,AMICA1,ARHGAP30,ARHGAP9,BTK,C1orf162,C1QA,C1QB,C1QC,C5AR1,C5orf20,CCL2,CCL3,CCL4,CCL5,CCR1,CCR2,CCR5,CCR7,CD163,CD180,CD247,CD28,CD2,CD300A,CD300C,CD300LF,CD33,CD37,CD3D,CD3E,CD3G,CD48,CD52,CD53,CD6,CD72,CD74,CD7,CD80,CD86,CD8A,CIITA,CRTAM,CST7,CXCL10,CXCL11,CXCL9,CXCR6,CXorf21,CYBB,CYTH4,CYTIP,DOCK2,DOK2,EVI2B,FASLG,FCER1G,FCN1,FCRL6,FGD2,FYB,GBP5,GPR171,GPR18,GPR34,G…	Spranger et al. 2016. PNAS.	10.1073/pnas.1609376113
Myeloid	myeloid cell gene expression	IL6,CXCL1,CXCL2,CXCL3,CXCL8,PTGS2	McDermott et al. 2018. Nat Med.	10.1038/s41591-018-0053-3
Angio	angiogenesis gene expression	VEGFA,KDR,ESM1,PECAM1,ANGPTL4,CD34	McDermott et al. 2018. Nat Med.	10.1038/s41591-018-0053-3
TGF-β	pan-fibroblast TGF-β response signature (Pan-F-TBRS)	ACTA2,ACTG2,ADAM12,ADAM19,CNN1,COL4A1,CTGF,CTPS1,FAM101B,FSTL3,HSPB1,IGFBP3,PXDC1,SEMA7A,SH3PXD2A,TAGLN,TGFBI,TNS1,TPM1	Mariathasan et al. 2018. Nature.	10.1038/nature25501

## Sheet: TableS9
Cancer	Sample.type	Sample.total	Gene1	Gene2	Spearman ρ estimate	statistic	p.value	method	alternative	p.adj
ACC	Tumor	79	ACE2	Angio.gene6	-0.0104187	83016	0.927304	Spearman's rank correlation rho	two.sided	0.957208
ACC	Normal	0	ACE2	Angio.gene6	NA	NA	NA	NA	NA	NA
BLCA	Tumor	408	ACE2	Angio.gene6	-0.148224	1.29973e+07	0.00268745	Spearman's rank correlation rho	two.sided	0.0120113
BLCA	Normal	19	ACE2	Angio.gene6	-0.338596	1526	0.156296	Spearman's rank correlation rho	two.sided	0.287085
BRCA	Tumor	1084	ACE2	Angio.gene6	0.187117	1.7257e+08	5.35018e-10	Spearman's rank correlation rho	two.sided	8.47111e-09
BRCA	Normal	113	ACE2	Angio.gene6	0.0128418	237376	0.892475	Spearman's rank correlation rho	two.sided	0.93257
CESC	Tumor	304	ACE2	Angio.gene6	0.0327959	4528798	0.568737	Spearman's rank correlation rho	two.sided	0.684099
CESC	Normal	3	ACE2	Angio.gene6	NA	NA	NA	NA	NA	NA
CHOL	Tumor	36	ACE2	Angio.gene6	0.0043758	7736	0.980282	Spearman's rank correlation rho	two.sided	0.98641
CHOL	Normal	9	ACE2	Angio.gene6	NA	NA	NA	NA	NA	NA
COAD	Tumor	447	ACE2	Angio.gene6	-0.0904699	16232404	0.0559866	Spearman's rank correlation rho	two.sided	0.135682
COAD	Normal	41	ACE2	Angio.gene6	-0.0977352	12602	0.541968	Spearman's rank correlation rho	two.sided	0.664156
DLBC	Tumor	48	ACE2	Angio.gene6	0.243347	13940.6	0.0955786	Spearman's rank correlation rho	two.sided	0.200884
DLBC	Normal	0	ACE2	Angio.gene6	NA	NA	NA	NA	NA	NA
ESCA	Tumor	161	ACE2	Angio.gene6	0.0793248	640348	0.316834	Spearman's rank correlation rho	two.sided	0.453582
ESCA	Normal	9	ACE2	Angio.gene6	NA	NA	NA	NA	NA	NA
GBM	Tumor	152	ACE2	Angio.gene6	-0.0899642	637930	0.27036	Spearman's rank correlation rho	two.sided	0.408984
GBM	Normal	0	ACE2	Angio.gene6	NA	NA	NA	NA	NA	NA
HNSC	Tumor	500	ACE2	Angio.gene6	-0.207846	25163366	2.91632e-06	Spearman's rank correlation rho	two.sided	2.27091e-05
HNSC	Normal	44	ACE2	Angio.gene6	-0.456237	20664	0.00205478	Spearman's rank correlation rho	two.sided	0.00966356
KICH	Tumor	65	ACE2	Angio.gene6	0.171287	37921.9	0.172483	Spearman's rank correlation rho	two.sided	0.305706
KICH	Normal	24	ACE2	Angio.gene6	-0.0226087	2352	0.917403	Spearman's rank correlation rho	two.sided	0.949382
KIRC	Tumor	530	ACE2	Angio.gene6	0.0909071	2.25571e+07	0.0364179	Spearman's rank correlation rho	two.sided	0.0961028
KIRC	Normal	72	ACE2	Angio.gene6	0.132324	53966	0.267195	Spearman's rank correlation rho	two.sided	0.405487
KIRP	Tumor	288	ACE2	Angio.gene6	-0.21256	4827520	0.000288483	Spearman's rank correlation rho	two.sided	0.00165096
KIRP	Normal	32	ACE2	Angio.gene6	0.244501	4122	0.176884	Spearman's rank correlation rho	two.sided	0.306663
LAML	Tumor	145	ACE2	Angio.gene6	-0.014964	515683	0.85822	Spearman's rank correlation rho	two.sided	0.909174
LAML	Normal	0	ACE2	Angio.gene6	NA	NA	NA	NA	NA	NA
LGG	Tumor	510	ACE2	Angio.gene6	0.11368	1.95951e+07	0.0101905	Spearman's rank correlation rho	two.sided	0.0348237
LGG	Normal	0	ACE2	Angio.gene6	NA	NA	NA	NA	NA	NA
LIHC	Tumor	371	ACE2	Angio.gene6	0.0697491	7.91712e+06	0.180062	Spearman's rank correlation rho	two.sided	0.30989
LIHC	Normal	50	ACE2	Angio.gene6	-0.161393	24186	0.261972	Spearman's rank correlation rho	two.sided	0.401409
LUAD	Tumor	512	ACE2	Angio.gene6	-0.0446653	2.33687e+07	0.313122	Spearman's rank correlation rho	two.sided	0.451996
LUAD	Normal	59	ACE2	Angio.gene6	-0.27031	43470	0.0387147	Spearman's rank correlation rho	two.sided	0.0994025
LUSC	Tumor	501	ACE2	Angio.gene6	-0.058126	22176734	0.193914	Spearman's rank correlation rho	two.sided	0.328961
LUSC	Normal	49	ACE2	Angio.gene6	-0.23398	24186	0.105603	Spearman's rank correlation rho	two.sided	0.217954
MESO	Tumor	86	ACE2	Angio.gene6	0.249809	79516.5	0.0203604	Spearman's rank correlation rho	two.sided	0.06121
MESO	Normal	0	ACE2	Angio.gene6	NA	NA	NA	NA	NA	NA
OV	Tumor	264	ACE2	Angio.gene6	0.0504937	2.91174e+06	0.413898	Spearman's rank correlation rho	two.sided	0.555371
OV	Normal	0	ACE2	Angio.gene6	NA	NA	NA	NA	NA	NA
PAAD	Tumor	177	ACE2	Angio.gene6	0.0200027	905690	0.791386	Spearman's rank correlation rho	two.sided	0.858238
PAAD	Normal	4	ACE2	Angio.gene6	NA	NA	NA	NA	NA	NA
PCPG	Tumor	178	ACE2	Angio.gene6	-0.0123609	951547	0.869921	Spearman's rank correlation rho	two.sided	0.91825
PCPG	Normal	3	ACE2	Angio.gene6	NA	NA	NA	NA	NA	NA
PRAD	Tumor	495	ACE2	Angio.gene6	0.24319	1.52985e+07	4.26672e-08	Spearman's rank correlation rho	two.sided	4.94316e-07
PRAD	Normal	52	ACE2	Angio.gene6	0.0658243	21884	0.642011	Spearman's rank correlation rho	two.sided	0.734832
READ	Tumor	159	ACE2	Angio.gene6	-0.047943	702038	0.548039	Spearman's rank correlation rho	two.sided	0.667483
READ	Normal	10	ACE2	Angio.gene6	NA	NA	NA	NA	NA	NA
SARC	Tumor	259	ACE2	Angio.gene6	0.0855037	2.64803e+06	0.170092	Spearman's rank correlation rho	two.sided	0.304081
SARC	Normal	2	ACE2	Angio.gene6	NA	NA	NA	NA	NA	NA
SKCMmets	Tumor	367	ACE2	Angio.gene6	0.0233647	8.04593e+06	0.655498	Spearman's rank correlation rho	two.sided	0.74667
SKCMmets	Normal	1	ACE2	Angio.gene6	NA	NA	NA	NA	NA	NA
SKCMprimary	Tumor	103	ACE2	Angio.gene6	0.209705	143916	0.033503	Spearman's rank correlation rho	two.sided	0.0889047
SKCMprimary	Normal	0	ACE2	Angio.gene6	NA	NA	NA	NA	NA	NA
STAD	Tumor	374	ACE2	Angio.gene6	0.0262086	8.49037e+06	0.61339	Spearman's rank correlation rho	two.sided	0.715873
STAD	Normal	30	ACE2	Angio.gene6	-0.473192	6622	0.00891452	Spearman's rank correlation rho	two.sided	0.0314217
TGCT	Tumor	134	ACE2	Angio.gene6	0.500177	200426	7.58143e-10	Spearman's rank correlation rho	two.sided	1.09127e-08
TGCT	Normal	0	ACE2	Angio.gene6	NA	NA	NA	NA	NA	NA
THCA	Tumor	502	ACE2	Angio.gene6	-0.0970915	2.31314e+07	0.0296236	Spearman's rank correlation rho	two.sided	0.07995
THCA	Normal	58	ACE2	Angio.gene6	0.180289	26648	0.175221	Spearman's rank correlation rho	two.sided	0.306663
THYM	Tumor	119	ACE2	Angio.gene6	-0.298796	364754	0.00101101	Spearman's rank correlation rho	two.sided	0.00510883
THYM	Normal	2	ACE2	Angio.gene6	NA	NA	NA	NA	NA	NA
UCEC	Tumor	530	ACE2	Angio.gene6	0.0988797	2.23593e+07	0.0228108	Spearman's rank correlation rho	two.sided	0.0656674
UCEC	Normal	22	ACE2	Angio.gene6	-0.59345	2822	0.00426607	Spearman's rank correlation rho	two.sided	0.0168865
UCS	Tumor	56	ACE2	Angio.gene6	0.0562894	27613	0.680297	Spearman's rank correlation rho	two.sided	0.769384
UCS	Normal	0	ACE2	Angio.gene6	NA	NA	NA	NA	NA	NA
UVM	Tumor	80	ACE2	Angio.gene6	-0.0746188	91686.5	0.510651	Spearman's rank correlation rho	two.sided	0.636638
UVM	Normal	0	ACE2	Angio.gene6	NA	NA	NA	NA	NA	NA
ACC	Tumor	79	ACE2	Tinfl.gene160	0.00925024	81400	0.935448	Spearman's rank correlation rho	two.sided	0.957208
ACC	Normal	0	ACE2	Tinfl.gene160	NA	NA	NA	NA	NA	NA
BLCA	Tumor	408	ACE2	Tinfl.gene160	0.114391	1.00246e+07	0.0208283	Spearman's rank correlation rho	two.sided	0.0618341
BLCA	Normal	19	ACE2	Tinfl.gene160	-0.0298246	1174	0.905336	Spearman's rank correlation rho	two.sided	0.940675
BRCA	Tumor	1084	ACE2	Tinfl.gene160	0.223837	1.64774e+08	8.92244e-14	Spearman's rank correlation rho	two.sided	2.35453e-12
BRCA	Normal	113	ACE2	Tinfl.gene160	0.059302	226204	0.532124	Spearman's rank correlation rho	two.sided	0.658226
CESC	Tumor	304	ACE2	Tinfl.gene160	0.214576	3677636	0.000168895	Spearman's rank correlation rho	two.sided	0.00104188
CESC	Normal	3	ACE2	Tinfl.gene160	NA	NA	NA	NA	NA	NA
CHOL	Tumor	36	ACE2	Tinfl.gene160	-0.0435006	8108	0.800663	Spearman's rank correlation rho	two.sided	0.863605
CHOL	Normal	9	ACE2	Tinfl.gene160	NA	NA	NA	NA	NA	NA
COAD	Tumor	447	ACE2	Tinfl.gene160	-0.240174	18460854	3.00619e-07	Spearman's rank correlation rho	two.sided	2.85588e-06
COAD	Normal	41	ACE2	Tinfl.gene160	-0.0763066	12356	0.634302	Spearman's rank correlation rho	two.sided	0.733074
DLBC	Tumor	48	ACE2	Tinfl.gene160	0.0902053	16762.1	0.542039	Spearman's rank correlation rho	two.sided	0.664156
DLBC	Normal	0	ACE2	Tinfl.gene160	NA	NA	NA	NA	NA	NA
ESCA	Tumor	161	ACE2	Tinfl.gene160	0.102116	624496	0.197186	Spearman's rank correlation rho	two.sided	0.333322
ESCA	Normal	9	ACE2	Tinfl.gene160	NA	NA	NA	NA	NA	NA
GBM	Tumor	152	ACE2	Tinfl.gene160	-0.0869736	636180	0.286672	Spearman's rank correlation rho	two.sided	0.427716
GBM	Normal	0	ACE2	Tinfl.gene160	NA	NA	NA	NA	NA	NA
HNSC	Tumor	500	ACE2	Tinfl.gene160	0.116813	18399664	0.00896954	Spearman's rank correlation rho	two.sided	0.0314217
HNSC	Normal	44	ACE2	Tinfl.gene160	-0.0520085	14928	0.736703	Spearman's rank correlation rho	two.sided	0.813799
KICH	Tumor	65	ACE2	Tinfl.gene160	0.127799	39911.9	0.310334	Spearman's rank correlation rho	two.sided	0.451996
KICH	Normal	24	ACE2	Tinfl.gene160	0.367826	1454	0.0777488	Spearman's rank correlation rho	two.sided	0.172573
KIRC	Tumor	530	ACE2	Tinfl.gene160	0.000968333	2.47887e+07	0.982256	Spearman's rank correlation rho	two.sided	0.98641
KIRC	Normal	72	ACE2	Tinfl.gene160	0.306804	43114	0.00899654	Spearman's rank correlation rho	two.sided	0.0314217
KIRP	Tumor	288	ACE2	Tinfl.gene160	0.10998	3543404	0.0623546	Spearman's rank correlation rho	two.sided	0.146958
KIRP	Normal	32	ACE2	Tinfl.gene160	0.193548	4400	0.287245	Spearman's rank correlation rho	two.sided	0.427716
LAML	Tumor	145	ACE2	Tinfl.gene160	-0.0730985	545220	0.382242	Spearman's rank correlation rho	two.sided	0.521738
LAML	Normal	0	ACE2	Tinfl.gene160	NA	NA	NA	NA	NA	NA
LGG	Tumor	510	ACE2	Tinfl.gene160	-0.0974841	2.42636e+07	0.0277116	Spearman's rank correlation rho	two.sided	0.0760869
LGG	Normal	0	ACE2	Tinfl.gene160	NA	NA	NA	NA	NA	NA
LIHC	Tumor	371	ACE2	Tinfl.gene160	-0.119077	9.52417e+06	0.0217897	Spearman's rank correlation rho	two.sided	0.0634977
LIHC	Normal	50	ACE2	Tinfl.gene160	-0.16946	24354	0.238625	Spearman's rank correlation rho	two.sided	0.382536
LUAD	Tumor	512	ACE2	Tinfl.gene160	-0.031638	2.30773e+07	0.475032	Spearman's rank correlation rho	two.sided	0.608195
LUAD	Normal	59	ACE2	Tinfl.gene160	0.202046	27306	0.124719	Spearman's rank correlation rho	two.sided	0.244505
LUSC	Tumor	501	ACE2	Tinfl.gene160	-0.0313813	21616206	0.483279	Spearman's rank correlation rho	two.sided	0.612447
LUSC	Normal	49	ACE2	Tinfl.gene160	-0.117551	21904	0.419978	Spearman's rank correlation rho	two.sided	0.560363
MESO	Tumor	86	ACE2	Tinfl.gene160	0.11436	93873.4	0.294428	Spearman's rank correlation rho	two.sided	0.435681
MESO	Normal	0	ACE2	Tinfl.gene160	NA	NA	NA	NA	NA	NA
OV	Tumor	264	ACE2	Tinfl.gene160	0.148351	2.61165e+06	0.0158504	Spearman's rank correlation rho	two.sided	0.0501928
OV	Normal	0	ACE2	Tinfl.gene160	NA	NA	NA	NA	NA	NA
PAAD	Tumor	177	ACE2	Tinfl.gene160	0.174928	762512	0.0199777	Spearman's rank correlation rho	two.sided	0.0608296
PAAD	Normal	4	ACE2	Tinfl.gene160	NA	NA	NA	NA	NA	NA
PCPG	Tumor	178	ACE2	Tinfl.gene160	0.0652924	878559	0.386547	Spearman's rank correlation rho	two.sided	0.526103
PCPG	Normal	3	ACE2	Tinfl.gene160	NA	NA	NA	NA	NA	NA
PRAD	Tumor	495	ACE2	Tinfl.gene160	0.339787	1.33459e+07	7.65712e-15	Spearman's rank correlation rho	two.sided	2.42475e-13
PRAD	Normal	52	ACE2	Tinfl.gene160	0.162981	19608	0.247531	Spearman's rank correlation rho	two.sided	0.388044
READ	Tumor	159	ACE2	Tinfl.gene160	-0.162536	778806	0.0407596	Spearman's rank correlation rho	two.sided	0.103534
READ	Normal	10	ACE2	Tinfl.gene160	NA	NA	NA	NA	NA	NA
SARC	Tumor	259	ACE2	Tinfl.gene160	-0.151714	3.33493e+06	0.014527	Spearman's rank correlation rho	two.sided	0.046941
SARC	Normal	2	ACE2	Tinfl.gene160	NA	NA	NA	NA	NA	NA
SKCMmets	Tumor	367	ACE2	Tinfl.gene160	-0.0817765	8.91212e+06	0.117844	Spearman's rank correlation rho	two.sided	0.234208
SKCMmets	Normal	1	ACE2	Tinfl.gene160	NA	NA	NA	NA	NA	NA
SKCMprimary	Tumor	103	ACE2	Tinfl.gene160	0.0231418	177890	0.816516	Spearman's rank correlation rho	two.sided	0.875497
SKCMprimary	Normal	0	ACE2	Tinfl.gene160	NA	NA	NA	NA	NA	NA
STAD	Tumor	374	ACE2	Tinfl.gene160	0.0698709	8.10968e+06	0.177542	Spearman's rank correlation rho	two.sided	0.306663
STAD	Normal	30	ACE2	Tinfl.gene160	0.41535	2628	0.023287	Spearman's rank correlation rho	two.sided	0.0666346
TGCT	Tumor	134	ACE2	Tinfl.gene160	-0.187424	476151	0.0301196	Spearman's rank correlation rho	two.sided	0.0808295
TGCT	Normal	0	ACE2	Tinfl.gene160	NA	NA	NA	NA	NA	NA
THCA	Tumor	502	ACE2	Tinfl.gene160	0.144104	1.80459e+07	0.00120551	Spearman's rank correlation rho	two.sided	0.00602755
THCA	Normal	58	ACE2	Tinfl.gene160	0.15488	27474	0.244979	Spearman's rank correlation rho	two.sided	0.387074
THYM	Tumor	119	ACE2	Tinfl.gene160	-0.167547	327894	0.0686167	Spearman's rank correlation rho	two.sided	0.159769
THYM	Normal	2	ACE2	Tinfl.gene160	NA	NA	NA	NA	NA	NA
UCEC	Tumor	530	ACE2	Tinfl.gene160	0.229498	1.91183e+07	9.17041e-08	Spearman's rank correlation rho	two.sided	9.89987e-07
UCEC	Normal	22	ACE2	Tinfl.gene160	0.079616	1630	0.724251	Spearman's rank correlation rho	two.sided	0.805666
UCS	Tumor	56	ACE2	Tinfl.gene160	0.234215	22406.9	0.0823119	Spearman's rank correlation rho	two.sided	0.18101
UCS	Normal	0	ACE2	Tinfl.gene160	NA	NA	NA	NA	NA	NA
UVM	Tumor	80	ACE2	Tinfl.gene160	-0.0880601	92833.3	0.437308	Spearman's rank correlation rho	two.sided	0.579858
UVM	Normal	0	ACE2	Tinfl.gene160	NA	NA	NA	NA	NA	NA
ACC	Tumor	79	ACE2	myeloid.gene6	-0.115117	91618	0.311697	Spearman's rank correlation rho	two.sided	0.451996
ACC	Normal	0	ACE2	myeloid.gene6	NA	NA	NA	NA	NA	NA
BLCA	Tumor	408	ACE2	myeloid.gene6	0.205712	8.99093e+06	2.82294e-05	Spearman's rank correlation rho	two.sided	0.000206292
BLCA	Normal	19	ACE2	myeloid.gene6	-0.359649	1550	0.130915	Spearman's rank correlation rho	two.sided	0.250867
BRCA	Tumor	1084	ACE2	myeloid.gene6	0.497419	1.06695e+08	7.94523e-69	Spearman's rank correlation rho	two.sided	4.71748e-67
BRCA	Normal	113	ACE2	myeloid.gene6	0.0845948	220122	0.372464	Spearman's rank correlation rho	two.sided	0.514303
CESC	Tumor	304	ACE2	myeloid.gene6	0.0430292	4480882	0.454549	Spearman's rank correlation rho	two.sided	0.586714
CESC	Normal	3	ACE2	myeloid.gene6	NA	NA	NA	NA	NA	NA
CHOL	Tumor	36	ACE2	myeloid.gene6	0.381725	4804	0.0222498	Spearman's rank correlation rho	two.sided	0.0644431
CHOL	Normal	9	ACE2	myeloid.gene6	NA	NA	NA	NA	NA	NA
COAD	Tumor	447	ACE2	myeloid.gene6	0.0941134	13484752	0.0467715	Spearman's rank correlation rho	two.sided	0.116235
COAD	Normal	41	ACE2	myeloid.gene6	-0.223868	14050	0.159002	Spearman's rank correlation rho	two.sided	0.290484
DLBC	Tumor	48	ACE2	myeloid.gene6	0.198245	14771.5	0.176784	Spearman's rank correlation rho	two.sided	0.306663
DLBC	Normal	0	ACE2	myeloid.gene6	NA	NA	NA	NA	NA	NA
ESCA	Tumor	161	ACE2	myeloid.gene6	0.0905883	632514	0.252816	Spearman's rank correlation rho	two.sided	0.395025
ESCA	Normal	9	ACE2	myeloid.gene6	NA	NA	NA	NA	NA	NA
GBM	Tumor	152	ACE2	myeloid.gene6	-0.131457	662214	0.106453	Spearman's rank correlation rho	two.sided	0.217954
GBM	Normal	0	ACE2	myeloid.gene6	NA	NA	NA	NA	NA	NA
HNSC	Tumor	500	ACE2	myeloid.gene6	-0.0559369	21998598	0.21172	Spearman's rank correlation rho	two.sided	0.350408
HNSC	Normal	44	ACE2	myeloid.gene6	-0.278647	18144	0.0672947	Spearman's rank correlation rho	two.sided	0.157463
KICH	Tumor	65	ACE2	myeloid.gene6	0.0101618	45295	0.935967	Spearman's rank correlation rho	two.sided	0.957208
KICH	Normal	24	ACE2	myeloid.gene6	-0.213913	2792	0.314018	Spearman's rank correlation rho	two.sided	0.451996
KIRC	Tumor	530	ACE2	myeloid.gene6	-0.316719	3.26714e+07	8.18576e-14	Spearman's rank correlation rho	two.sided	2.2872e-12
KIRC	Normal	72	ACE2	myeloid.gene6	-0.427841	88806	0.000203961	Spearman's rank correlation rho	two.sided	0.00122635
KIRP	Tumor	288	ACE2	myeloid.gene6	-0.168309	4651348	0.00422043	Spearman's rank correlation rho	two.sided	0.0168462
KIRP	Normal	32	ACE2	myeloid.gene6	-0.27676	6966	0.125083	Spearman's rank correlation rho	two.sided	0.244505
LAML	Tumor	145	ACE2	myeloid.gene6	0.100702	456915	0.228132	Spearman's rank correlation rho	two.sided	0.368581
LAML	Normal	0	ACE2	myeloid.gene6	NA	NA	NA	NA	NA	NA
LGG	Tumor	510	ACE2	myeloid.gene6	-0.0605207	2.34464e+07	0.172364	Spearman's rank correlation rho	two.sided	0.305706
LGG	Normal	0	ACE2	myeloid.gene6	NA	NA	NA	NA	NA	NA
LIHC	Tumor	371	ACE2	myeloid.gene6	0.0281419	8.27123e+06	0.58897	Spearman's rank correlation rho	two.sided	0.699402
LIHC	Normal	50	ACE2	myeloid.gene6	-0.0840816	22576	0.560469	Spearman's rank correlation rho	two.sided	0.679139
LUAD	Tumor	512	ACE2	myeloid.gene6	-0.107072	2.47647e+07	0.0153586	Spearman's rank correlation rho	two.sided	0.0492927
LUAD	Normal	59	ACE2	myeloid.gene6	0.108708	30500	0.411448	Spearman's rank correlation rho	two.sided	0.553648
LUSC	Tumor	501	ACE2	myeloid.gene6	0.202485	16714716	5.14998e-06	Spearman's rank correlation rho	two.sided	3.94555e-05
LUSC	Normal	49	ACE2	myeloid.gene6	0.322143	13286	0.024427	Spearman's rank correlation rho	two.sided	0.0690645
MESO	Tumor	86	ACE2	myeloid.gene6	0.20765	83985.1	0.0550534	Spearman's rank correlation rho	two.sided	0.13474
MESO	Normal	0	ACE2	myeloid.gene6	NA	NA	NA	NA	NA	NA
OV	Tumor	264	ACE2	myeloid.gene6	0.0982068	2.76542e+06	0.111396	Spearman's rank correlation rho	two.sided	0.224208
OV	Normal	0	ACE2	myeloid.gene6	NA	NA	NA	NA	NA	NA
PAAD	Tumor	177	ACE2	myeloid.gene6	0.0499126	878048	0.509051	Spearman's rank correlation rho	two.sided	0.636314
PAAD	Normal	4	ACE2	myeloid.gene6	NA	NA	NA	NA	NA	NA
PCPG	Tumor	178	ACE2	myeloid.gene6	0.119858	827271	0.111028	Spearman's rank correlation rho	two.sided	0.224208
PCPG	Normal	3	ACE2	myeloid.gene6	NA	NA	NA	NA	NA	NA
PRAD	Tumor	495	ACE2	myeloid.gene6	0.307303	1.40025e+07	2.75659e-12	Spearman's rank correlation rho	two.sided	5.69296e-11
PRAD	Normal	52	ACE2	myeloid.gene6	0.665671	7832	1.98253e-07	Spearman's rank correlation rho	two.sided	1.96187e-06
READ	Tumor	159	ACE2	myeloid.gene6	0.0331323	647724	0.67812	Spearman's rank correlation rho	two.sided	0.768751
READ	Normal	10	ACE2	myeloid.gene6	NA	NA	NA	NA	NA	NA
SARC	Tumor	259	ACE2	myeloid.gene6	-0.0110593	2.92764e+06	0.859409	Spearman's rank correlation rho	two.sided	0.909174
SARC	Normal	2	ACE2	myeloid.gene6	NA	NA	NA	NA	NA	NA
[truncated: 484 more rows]

[truncated: 3 more sheets: TableS10, TableS11, TableS12]
